# Supplementary material for: A signature of immune-related gene pairs (IRGPs) for risk stratification and prognosis of oral cancer patients
Source: World J Surg Oncol. 2022 Jul 8;20:227. doi: 10.1186/s12957-022-02630-1 (PMC9264557; doi:10.1186/s12957-022-02630-1)
Supplement: Supplementary file 1 — Additional file 1. [file 12957_2022_2630_MOESM1_ESM.xls]

NAME	GS<br> follow link to MSigDB	GS DETAILS	SIZE	ES	NES	NOM p-val	FDR q-val	FWER p-val	RANK AT MAX	LEADING EDGE
GO_DEFENSE_RESPONSE_TO_BACTERIUM	GO_DEFENSE_RESPONSE_TO_BACTERIUM	Details ...	310	0.6595832	2.296736	0	0.001688096	0.001	5617	tags=44%, list=10%, signal=48%
GO_DEFENSE_RESPONSE_TO_OTHER_ORGANISM	GO_DEFENSE_RESPONSE_TO_OTHER_ORGANISM	Details ...	548	0.6009738	2.2695603	0	8.44E-04	0.001	7014	tags=41%, list=13%, signal=47%
GO_T_CELL_ACTIVATION_INVOLVED_IN_IMMUNE_RESPONSE	GO_T_CELL_ACTIVATION_INVOLVED_IN_IMMUNE_RESPONSE	Details ...	98	0.7295425	2.2695155	0	5.63E-04	0.001	9099	tags=62%, list=16%, signal=74%
GO_POSITIVE_REGULATION_OF_T_CELL_PROLIFERATION	GO_POSITIVE_REGULATION_OF_T_CELL_PROLIFERATION	Details ...	94	0.7334085	2.2648206	0	4.22E-04	0.001	2386	tags=45%, list=4%, signal=47%
GO_REGULATION_OF_CELL_ACTIVATION	GO_REGULATION_OF_CELL_ACTIVATION	Details ...	594	0.6555503	2.2506819	0	3.38E-04	0.001	5792	tags=45%, list=10%, signal=49%
GO_ADAPTIVE_IMMUNE_RESPONSE	GO_ADAPTIVE_IMMUNE_RESPONSE	Details ...	608	0.7871243	2.2477322	0	2.81E-04	0.001	4698	tags=62%, list=9%, signal=67%
GO_REGULATION_OF_T_CELL_DIFFERENTIATION	GO_REGULATION_OF_T_CELL_DIFFERENTIATION	Details ...	134	0.69418085	2.2433376	0	2.41E-04	0.001	3442	tags=41%, list=6%, signal=44%
GO_ANTIGEN_RECEPTOR_MEDIATED_SIGNALING_PATHWAY	GO_ANTIGEN_RECEPTOR_MEDIATED_SIGNALING_PATHWAY	Details ...	297	0.70863295	2.2418363	0	2.11E-04	0.001	2733	tags=48%, list=5%, signal=51%
GO_REGULATION_OF_LYMPHOCYTE_ACTIVATION	GO_REGULATION_OF_LYMPHOCYTE_ACTIVATION	Details ...	469	0.6816211	2.2417097	0	1.88E-04	0.001	5792	tags=49%, list=10%, signal=54%
GO_NATURAL_KILLER_CELL_ACTIVATION	GO_NATURAL_KILLER_CELL_ACTIVATION	Details ...	86	0.6551208	2.2380373	0	2.48E-04	0.002	4922	tags=38%, list=9%, signal=42%
GO_POSITIVE_REGULATION_OF_LYMPHOCYTE_ACTIVATION	GO_POSITIVE_REGULATION_OF_LYMPHOCYTE_ACTIVATION		321	0.7081967	2.237594	0	2.25E-04	0.002	4333	tags=49%, list=8%, signal=53%
GO_POSITIVE_REGULATION_OF_CELL_ACTIVATION	GO_POSITIVE_REGULATION_OF_CELL_ACTIVATION		377	0.69396394	2.235056	0	2.06E-04	0.002	4735	tags=47%, list=9%, signal=51%
GO_POSITIVE_REGULATION_OF_LEUKOCYTE_PROLIFERATION	GO_POSITIVE_REGULATION_OF_LEUKOCYTE_PROLIFERATION		137	0.6874241	2.224689	0	2.48E-04	0.003	4333	tags=45%, list=8%, signal=48%
GO_T_CELL_ACTIVATION	GO_T_CELL_ACTIVATION		454	0.63768417	2.2173154	0	2.30E-04	0.003	6256	tags=43%, list=11%, signal=49%
GO_LYMPHOCYTE_ACTIVATION	GO_LYMPHOCYTE_ACTIVATION		710	0.6606852	2.216955	0	2.15E-04	0.003	5033	tags=44%, list=9%, signal=47%
GO_REGULATION_OF_T_CELL_ACTIVATION	GO_REGULATION_OF_T_CELL_ACTIVATION		308	0.64887416	2.2096653	0	2.47E-04	0.003	6216	tags=44%, list=11%, signal=50%
GO_REGULATORY_T_CELL_DIFFERENTIATION	GO_REGULATORY_T_CELL_DIFFERENTIATION		30	0.84314	2.209339	0	2.33E-04	0.003	2232	tags=53%, list=4%, signal=56%
GO_REGULATION_OF_LYMPHOCYTE_DIFFERENTIATION	GO_REGULATION_OF_LYMPHOCYTE_DIFFERENTIATION		164	0.67410445	2.207457	0	2.61E-04	0.003	3885	tags=41%, list=7%, signal=44%
GO_LYMPHOCYTE_DIFFERENTIATION	GO_LYMPHOCYTE_DIFFERENTIATION		343	0.6573743	2.2010946	0	2.47E-04	0.003	6256	tags=46%, list=11%, signal=51%
GO_B_CELL_ACTIVATION	GO_B_CELL_ACTIVATION		295	0.71674716	2.1982462	0	2.35E-04	0.003	4974	tags=51%, list=9%, signal=56%
GO_T_CELL_DIFFERENTIATION	GO_T_CELL_DIFFERENTIATION		231	0.68029577	2.186749	0	3.67E-04	0.005	8739	tags=56%, list=16%, signal=67%
GO_REGULATION_OF_LEUKOCYTE_PROLIFERATION	GO_REGULATION_OF_LEUKOCYTE_PROLIFERATION		217	0.65239173	2.1864038	0	3.50E-04	0.005	5289	tags=43%, list=10%, signal=48%
GO_RESPONSE_TO_BACTERIUM	GO_RESPONSE_TO_BACTERIUM		669	0.5778678	2.1818566	0	3.35E-04	0.005	6873	tags=39%, list=12%, signal=45%
GO_LYMPHOCYTE_MEDIATED_IMMUNITY	GO_LYMPHOCYTE_MEDIATED_IMMUNITY		339	0.73231286	2.181823	0	3.21E-04	0.005	4696	tags=55%, list=9%, signal=59%
GO_LEUKOCYTE_CELL_CELL_ADHESION	GO_LEUKOCYTE_CELL_CELL_ADHESION		328	0.6375357	2.1813087	0	3.08E-04	0.005	6216	tags=44%, list=11%, signal=49%
GO_REGULATION_OF_CELL_KILLING	GO_REGULATION_OF_CELL_KILLING		91	0.70497334	2.1811566	0	2.97E-04	0.005	5207	tags=53%, list=9%, signal=58%
GO_REGULATION_OF_IMMUNE_EFFECTOR_PROCESS	GO_REGULATION_OF_IMMUNE_EFFECTOR_PROCESS		451	0.6485917	2.1796315	0	2.86E-04	0.005	6623	tags=47%, list=12%, signal=53%
GO_NEGATIVE_REGULATION_OF_LYMPHOCYTE_ACTIVATION	GO_NEGATIVE_REGULATION_OF_LYMPHOCYTE_ACTIVATION		139	0.6492041	2.1777225	0	2.75E-04	0.005	6358	tags=47%, list=12%, signal=54%
GO_GRANULOCYTE_MACROPHAGE_COLONY_STIMULATING_FACTOR_PRODUCTION	GO_GRANULOCYTE_MACROPHAGE_COLONY_STIMULATING_FACTOR_PRODUCTION		16	0.86427146	2.17762	0	2.66E-04	0.005	3099	tags=63%, list=6%, signal=66%
GO_IMMUNE_RESPONSE_REGULATING_SIGNALING_PATHWAY	GO_IMMUNE_RESPONSE_REGULATING_SIGNALING_PATHWAY		650	0.6395862	2.175058	0	2.57E-04	0.005	6270	tags=48%, list=11%, signal=54%
GO_IMMUNE_RESPONSE_REGULATING_CELL_SURFACE_RECEPTOR_SIGNALING_PATHWAY	GO_IMMUNE_RESPONSE_REGULATING_CELL_SURFACE_RECEPTOR_SIGNALING_PATHWAY		485	0.67513424	2.1737514	0.001733102	2.49E-04	0.005	6216	tags=53%, list=11%, signal=59%
GO_REGULATION_OF_B_CELL_ACTIVATION	GO_REGULATION_OF_B_CELL_ACTIVATION		175	0.7802968	2.1704476	0	2.64E-04	0.005	4333	tags=61%, list=8%, signal=66%
GO_ALPHA_BETA_T_CELL_DIFFERENTIATION	GO_ALPHA_BETA_T_CELL_DIFFERENTIATION		99	0.74509627	2.1701648	0	2.56E-04	0.005	8739	tags=69%, list=16%, signal=81%
GO_INNATE_IMMUNE_RESPONSE	GO_INNATE_IMMUNE_RESPONSE		967	0.5745305	2.1651802	0	4.44E-04	0.008	7532	tags=42%, list=14%, signal=48%
GO_CD4_POSITIVE_ALPHA_BETA_T_CELL_ACTIVATION	GO_CD4_POSITIVE_ALPHA_BETA_T_CELL_ACTIVATION		85	0.7250675	2.1650562	0	4.31E-04	0.008	3101	tags=49%, list=6%, signal=52%
GO_LEUKOCYTE_PROLIFERATION	GO_LEUKOCYTE_PROLIFERATION		288	0.62863857	2.1633644	0	4.19E-04	0.008	6358	tags=42%, list=12%, signal=48%
GO_ADAPTIVE_IMMUNE_RESPONSE_BASED_ON_SOMATIC_RECOMBINATION_OF_IMMUNE_RECEPTORS_BUILT_FROM_IMMUNOGLOBULIN_SUPERFAMILY_DOMAINS	GO_ADAPTIVE_IMMUNE_RESPONSE_BASED_ON_SOMATIC_RECOMBINATION_OF_IMMUNE_RECEPTORS_BUILT_FROM_IMMUNOGLOBULIN_SUPERFAMILY_DOMAINS		344	0.72518307	2.162581	0	4.08E-04	0.008	4696	tags=54%, list=9%, signal=58%
GO_LEUKOCYTE_MEDIATED_CYTOTOXICITY	GO_LEUKOCYTE_MEDIATED_CYTOTOXICITY		108	0.6739077	2.1621284	0	3.97E-04	0.008	4696	tags=45%, list=9%, signal=49%
GO_ALPHA_BETA_T_CELL_ACTIVATION	GO_ALPHA_BETA_T_CELL_ACTIVATION		133	0.7179981	2.1594937	0	4.25E-04	0.008	3222	tags=48%, list=6%, signal=51%
GO_T_CELL_DIFFERENTIATION_INVOLVED_IN_IMMUNE_RESPONSE	GO_T_CELL_DIFFERENTIATION_INVOLVED_IN_IMMUNE_RESPONSE		64	0.76244783	2.1546588	0	5.32E-04	0.01	8662	tags=72%, list=16%, signal=85%
GO_POSITIVE_REGULATION_OF_LEUKOCYTE_CELL_CELL_ADHESION	GO_POSITIVE_REGULATION_OF_LEUKOCYTE_CELL_CELL_ADHESION		212	0.66052204	2.1531487	0	5.37E-04	0.01	4704	tags=43%, list=9%, signal=47%
GO_POSITIVE_REGULATION_OF_LYMPHOCYTE_DIFFERENTIATION	GO_POSITIVE_REGULATION_OF_LYMPHOCYTE_DIFFERENTIATION		90	0.7026043	2.151574	0	5.24E-04	0.01	3442	tags=44%, list=6%, signal=47%
GO_RESPIRATORY_BURST	GO_RESPIRATORY_BURST		36	0.75910646	2.1486752	0	6.69E-04	0.015	2076	tags=42%, list=4%, signal=43%
GO_ACTIVATION_OF_IMMUNE_RESPONSE	GO_ACTIVATION_OF_IMMUNE_RESPONSE		696	0.6233636	2.1475673	0.001718213	6.72E-04	0.016	6914	tags=47%, list=13%, signal=54%
GO_REGULATION_OF_IMMUNE_RESPONSE	GO_REGULATION_OF_IMMUNE_RESPONSE		1076	0.6103581	2.1452935	0.001757469	6.75E-04	0.017	7307	tags=46%, list=13%, signal=51%
GO_B_CELL_PROLIFERATION	GO_B_CELL_PROLIFERATION		93	0.69789505	2.144585	0	6.60E-04	0.017	6544	tags=48%, list=12%, signal=55%
GO_MEMBRANE_INVAGINATION	GO_MEMBRANE_INVAGINATION		124	0.783466	2.1438112	0	6.62E-04	0.017	2910	tags=55%, list=5%, signal=58%
GO_POSITIVE_REGULATION_OF_CELL_CELL_ADHESION	GO_POSITIVE_REGULATION_OF_CELL_CELL_ADHESION		249	0.6334236	2.1425455	0.001769912	6.68E-04	0.018	6216	tags=43%, list=11%, signal=48%
GO_POSITIVE_REGULATION_OF_INFLAMMATORY_RESPONSE	GO_POSITIVE_REGULATION_OF_INFLAMMATORY_RESPONSE		138	0.629371	2.1420016	0	6.55E-04	0.018	4644	tags=41%, list=8%, signal=44%
GO_REGULATION_OF_CD4_POSITIVE_ALPHA_BETA_T_CELL_DIFFERENTIATION	GO_REGULATION_OF_CD4_POSITIVE_ALPHA_BETA_T_CELL_DIFFERENTIATION		45	0.77619743	2.139737	0	6.66E-04	0.019	3101	tags=56%, list=6%, signal=59%
GO_CELLULAR_DEFENSE_RESPONSE	GO_CELLULAR_DEFENSE_RESPONSE		53	0.7562022	2.13756	0	6.53E-04	0.019	5024	tags=49%, list=9%, signal=54%
GO_HUMORAL_IMMUNE_RESPONSE	GO_HUMORAL_IMMUNE_RESPONSE		343	0.67385554	2.1343288	0	7.06E-04	0.021	6216	tags=50%, list=11%, signal=56%
GO_NATURAL_KILLER_CELL_MEDIATED_IMMUNITY	GO_NATURAL_KILLER_CELL_MEDIATED_IMMUNITY		65	0.72382224	2.1317255	0	7.95E-04	0.023	2952	tags=48%, list=5%, signal=50%
GO_NEGATIVE_REGULATION_OF_CELL_ACTIVATION	GO_NEGATIVE_REGULATION_OF_CELL_ACTIVATION		189	0.6250419	2.1315854	0	7.81E-04	0.023	6358	tags=44%, list=12%, signal=50%
GO_POSITIVE_REGULATION_OF_CELL_KILLING	GO_POSITIVE_REGULATION_OF_CELL_KILLING		66	0.703073	2.1307795	0	7.66E-04	0.023	5207	tags=53%, list=9%, signal=58%
GO_T_CELL_PROLIFERATION	GO_T_CELL_PROLIFERATION		177	0.6342154	2.1291783	0	7.53E-04	0.023	2386	tags=35%, list=4%, signal=36%
GO_POSITIVE_REGULATION_OF_INTERFERON_GAMMA_PRODUCTION	GO_POSITIVE_REGULATION_OF_INTERFERON_GAMMA_PRODUCTION		64	0.76171815	2.1279867	0	7.53E-04	0.023	4284	tags=55%, list=8%, signal=59%
GO_REGULATION_OF_CD4_POSITIVE_ALPHA_BETA_T_CELL_ACTIVATION	GO_REGULATION_OF_CD4_POSITIVE_ALPHA_BETA_T_CELL_ACTIVATION		56	0.7173934	2.126327	0	7.65E-04	0.024	3101	tags=48%, list=6%, signal=51%
GO_POSITIVE_REGULATION_OF_IMMUNE_RESPONSE	GO_POSITIVE_REGULATION_OF_IMMUNE_RESPONSE		874	0.60642904	2.1254468	0.001733102	7.52E-04	0.024	5496	tags=41%, list=10%, signal=45%
GO_POSITIVE_REGULATION_OF_IMMUNE_SYSTEM_PROCESS	GO_POSITIVE_REGULATION_OF_IMMUNE_SYSTEM_PROCESS		1149	0.59012955	2.1250448	0.001724138	7.52E-04	0.025	6270	tags=40%, list=11%, signal=45%
GO_B_CELL_RECEPTOR_SIGNALING_PATHWAY	GO_B_CELL_RECEPTOR_SIGNALING_PATHWAY		113	0.88030434	2.124784	0	7.40E-04	0.025	2733	tags=78%, list=5%, signal=82%
GO_REGULATION_OF_LYMPHOCYTE_MIGRATION	GO_REGULATION_OF_LYMPHOCYTE_MIGRATION		61	0.67156625	2.1223967	0	7.28E-04	0.025	4704	tags=43%, list=9%, signal=47%
GO_POSITIVE_REGULATION_OF_CYTOKINE_PRODUCTION_INVOLVED_IN_INFLAMMATORY_RESPONSE	GO_POSITIVE_REGULATION_OF_CYTOKINE_PRODUCTION_INVOLVED_IN_INFLAMMATORY_RESPONSE		15	0.8179618	2.1214666	0	7.75E-04	0.027	4255	tags=73%, list=8%, signal=79%
GO_POSITIVE_REGULATION_OF_B_CELL_ACTIVATION	GO_POSITIVE_REGULATION_OF_B_CELL_ACTIVATION		132	0.7920287	2.121318	0	7.63E-04	0.027	2295	tags=58%, list=4%, signal=60%
GO_REGULATION_OF_ALPHA_BETA_T_CELL_ACTIVATION	GO_REGULATION_OF_ALPHA_BETA_T_CELL_ACTIVATION		90	0.70172983	2.1202025	0	7.63E-04	0.027	3101	tags=46%, list=6%, signal=48%
GO_REGULATION_OF_ANTIGEN_RECEPTOR_MEDIATED_SIGNALING_PATHWAY	GO_REGULATION_OF_ANTIGEN_RECEPTOR_MEDIATED_SIGNALING_PATHWAY		61	0.7554285	2.1176858	0	7.51E-04	0.027	4634	tags=56%, list=8%, signal=61%
GO_LEUKOCYTE_MIGRATION	GO_LEUKOCYTE_MIGRATION		482	0.6306774	2.1175082	0	7.40E-04	0.027	4704	tags=41%, list=9%, signal=45%
GO_REGULATION_OF_ALPHA_BETA_T_CELL_DIFFERENTIATION	GO_REGULATION_OF_ALPHA_BETA_T_CELL_DIFFERENTIATION		61	0.7197838	2.1166387	0	7.29E-04	0.027	3101	tags=48%, list=6%, signal=50%
GO_INTERFERON_GAMMA_PRODUCTION	GO_INTERFERON_GAMMA_PRODUCTION		108	0.67736304	2.1162558	0	7.39E-04	0.028	6764	tags=52%, list=12%, signal=59%
GO_NEGATIVE_REGULATION_OF_LEUKOCYTE_CELL_CELL_ADHESION	GO_NEGATIVE_REGULATION_OF_LEUKOCYTE_CELL_CELL_ADHESION		121	0.62944984	2.115263	0	7.41E-04	0.028	6358	tags=44%, list=12%, signal=49%
GO_DEFENSE_RESPONSE	GO_DEFENSE_RESPONSE		1679	0.54051	2.1125197	0	7.43E-04	0.029	7532	tags=38%, list=14%, signal=43%
GO_REGULATION_OF_CELL_CELL_ADHESION	GO_REGULATION_OF_CELL_CELL_ADHESION		389	0.58490187	2.1108494	0	7.94E-04	0.031	6216	tags=38%, list=11%, signal=43%
GO_RESPONSE_TO_BIOTIC_STIMULUS	GO_RESPONSE_TO_BIOTIC_STIMULUS		1011	0.5334911	2.1104445	0	7.83E-04	0.031	7120	tags=37%, list=13%, signal=42%
GO_CELL_KILLING	GO_CELL_KILLING		160	0.60600525	2.108757	0	8.10E-04	0.033	5470	tags=40%, list=10%, signal=44%
GO_REGULATION_OF_IMMUNE_SYSTEM_PROCESS	GO_REGULATION_OF_IMMUNE_SYSTEM_PROCESS		1606	0.5689838	2.1046157	0.001730104	8.44E-04	0.034	7307	tags=40%, list=13%, signal=45%
GO_POSITIVE_T_CELL_SELECTION	GO_POSITIVE_T_CELL_SELECTION		35	0.85291845	2.1038694	0	8.54E-04	0.035	3424	tags=69%, list=6%, signal=73%
GO_LYMPHOCYTE_ACTIVATION_INVOLVED_IN_IMMUNE_RESPONSE	GO_LYMPHOCYTE_ACTIVATION_INVOLVED_IN_IMMUNE_RESPONSE		173	0.6422762	2.1032772	0	8.63E-04	0.037	9099	tags=51%, list=16%, signal=61%
GO_LYMPHOCYTE_MIGRATION	GO_LYMPHOCYTE_MIGRATION		105	0.67286617	2.0990486	0	9.76E-04	0.039	4704	tags=46%, list=9%, signal=50%
GO_PHAGOCYTOSIS	GO_PHAGOCYTOSIS		343	0.67735255	2.097319	0.001760563	9.95E-04	0.041	4644	tags=45%, list=8%, signal=49%
GO_CELL_RECOGNITION	GO_CELL_RECOGNITION		203	0.6533209	2.0939915	0	0.001084725	0.045	2542	tags=37%, list=5%, signal=39%
GO_T_CELL_SELECTION	GO_T_CELL_SELECTION		48	0.7942019	2.0938058	0	0.001080486	0.045	5593	tags=65%, list=10%, signal=72%
GO_PRODUCTION_OF_MOLECULAR_MEDIATOR_OF_IMMUNE_RESPONSE	GO_PRODUCTION_OF_MOLECULAR_MEDIATOR_OF_IMMUNE_RESPONSE		276	0.6713941	2.0927713	0.001727116	0.001112212	0.047	4609	tags=47%, list=8%, signal=51%
GO_CD4_POSITIVE_OR_CD8_POSITIVE_ALPHA_BETA_T_CELL_LINEAGE_COMMITMENT	GO_CD4_POSITIVE_OR_CD8_POSITIVE_ALPHA_BETA_T_CELL_LINEAGE_COMMITMENT		21	0.8690989	2.089474	0	0.001128264	0.049	1732	tags=62%, list=3%, signal=64%
GO_REGULATION_OF_LEUKOCYTE_DIFFERENTIATION	GO_REGULATION_OF_LEUKOCYTE_DIFFERENTIATION		266	0.60947156	2.0882843	0	0.001123658	0.049	4255	tags=36%, list=8%, signal=39%
GO_RESPONSE_TO_CHEMOKINE	GO_RESPONSE_TO_CHEMOKINE		94	0.69839424	2.0876725	0	0.001147571	0.05	8158	tags=57%, list=15%, signal=67%
GO_POSITIVE_REGULATION_OF_ALPHA_BETA_T_CELL_ACTIVATION	GO_POSITIVE_REGULATION_OF_ALPHA_BETA_T_CELL_ACTIVATION		60	0.70457435	2.0875893	0	0.001134227	0.05	2970	tags=45%, list=5%, signal=48%
GO_REGULATION_OF_B_CELL_PROLIFERATION	GO_REGULATION_OF_B_CELL_PROLIFERATION		60	0.74566776	2.0840526	0	0.001261803	0.056	4735	tags=55%, list=9%, signal=60%
GO_B_CELL_MEDIATED_IMMUNITY	GO_B_CELL_MEDIATED_IMMUNITY		207	0.7756384	2.0835693	0	0.001273797	0.057	4609	tags=61%, list=8%, signal=66%
GO_T_CELL_MIGRATION	GO_T_CELL_MIGRATION		61	0.7102749	2.0826528	0	0.00128536	0.057	5633	tags=51%, list=10%, signal=57%
GO_REGULATION_OF_MYELOID_LEUKOCYTE_MEDIATED_IMMUNITY	GO_REGULATION_OF_MYELOID_LEUKOCYTE_MEDIATED_IMMUNITY		53	0.6586539	2.0807786	0	0.001304216	0.057	7459	tags=49%, list=14%, signal=57%
GO_REGULATION_OF_LEUKOCYTE_MEDIATED_IMMUNITY	GO_REGULATION_OF_LEUKOCYTE_MEDIATED_IMMUNITY		200	0.6187803	2.0790515	0	0.001308865	0.058	7459	tags=46%, list=14%, signal=53%
GO_POSITIVE_REGULATION_OF_CYTOKINE_PRODUCTION	GO_POSITIVE_REGULATION_OF_CYTOKINE_PRODUCTION		443	0.5594839	2.0783448	0	0.001313307	0.058	7874	tags=40%, list=14%, signal=46%
GO_LEUKOCYTE_DIFFERENTIATION	GO_LEUKOCYTE_DIFFERENTIATION		503	0.58798414	2.0780797	0	0.00130835	0.058	6256	tags=38%, list=11%, signal=43%
GO_NEGATIVE_REGULATION_OF_LEUKOCYTE_PROLIFERATION	GO_NEGATIVE_REGULATION_OF_LEUKOCYTE_PROLIFERATION		76	0.6475149	2.0774639	0	0.001327472	0.06	6358	tags=49%, list=12%, signal=55%
GO_INTERLEUKIN_6_PRODUCTION	GO_INTERLEUKIN_6_PRODUCTION		137	0.6179046	2.0749865	0	0.001412307	0.065	6270	tags=42%, list=11%, signal=48%
GO_MAST_CELL_ACTIVATION	GO_MAST_CELL_ACTIVATION		58	0.6822425	2.0746324	0	0.001397595	0.065	7259	tags=57%, list=13%, signal=65%
GO_T_HELPER_17_TYPE_IMMUNE_RESPONSE	GO_T_HELPER_17_TYPE_IMMUNE_RESPONSE		26	0.82702583	2.0737312	0	0.001420552	0.069	4243	tags=65%, list=8%, signal=71%
GO_CELL_ACTIVATION	GO_CELL_ACTIVATION		1406	0.55062586	2.0718493	0.001748252	0.001437058	0.07	6270	tags=36%, list=11%, signal=39%
GO_CYTOKINE_PRODUCTION_INVOLVED_IN_INFLAMMATORY_RESPONSE	GO_CYTOKINE_PRODUCTION_INVOLVED_IN_INFLAMMATORY_RESPONSE		44	0.6373293	2.0689678	0	0.001479562	0.073	7624	tags=50%, list=14%, signal=58%
GO_NEGATIVE_REGULATION_OF_ANTIGEN_RECEPTOR_MEDIATED_SIGNALING_PATHWAY	GO_NEGATIVE_REGULATION_OF_ANTIGEN_RECEPTOR_MEDIATED_SIGNALING_PATHWAY		27	0.7796343	2.0682006	0	0.001495545	0.074	4634	tags=63%, list=8%, signal=69%
GO_LEUKOCYTE_HOMEOSTASIS	GO_LEUKOCYTE_HOMEOSTASIS		86	0.6617494	2.0679927	0	0.001480737	0.074	5891	tags=48%, list=11%, signal=53%
GO_ALPHA_BETA_T_CELL_PROLIFERATION	GO_ALPHA_BETA_T_CELL_PROLIFERATION		32	0.7643688	2.0678136	0	0.00146622	0.074	2232	tags=47%, list=4%, signal=49%
GO_IMMUNE_EFFECTOR_PROCESS	GO_IMMUNE_EFFECTOR_PROCESS		1243	0.55329055	2.0671296	0.001736111	0.00147499	0.074	7259	tags=39%, list=13%, signal=44%
GO_REGULATION_OF_T_HELPER_CELL_DIFFERENTIATION	GO_REGULATION_OF_T_HELPER_CELL_DIFFERENTIATION		33	0.7566588	2.0664108	0	0.001522431	0.076	8064	tags=70%, list=15%, signal=82%
GO_ALPHA_BETA_T_CELL_LINEAGE_COMMITMENT	GO_ALPHA_BETA_T_CELL_LINEAGE_COMMITMENT		19	0.8884192	2.0660007	0	0.001540271	0.078	1732	tags=63%, list=3%, signal=65%
GO_NEUTROPHIL_MIGRATION	GO_NEUTROPHIL_MIGRATION		111	0.6706727	2.0657134	0	0.001533774	0.078	6965	tags=50%, list=13%, signal=57%
GO_POSITIVE_REGULATION_OF_GRANULOCYTE_MACROPHAGE_COLONY_STIMULATING_FACTOR_PRODUCTION	GO_POSITIVE_REGULATION_OF_GRANULOCYTE_MACROPHAGE_COLONY_STIMULATING_FACTOR_PRODUCTION		13	0.8374476	2.0628424	0	0.001646354	0.083	3099	tags=54%, list=6%, signal=57%
GO_POSITIVE_REGULATION_OF_ALPHA_BETA_T_CELL_DIFFERENTIATION	GO_POSITIVE_REGULATION_OF_ALPHA_BETA_T_CELL_DIFFERENTIATION		45	0.7159454	2.061751	0	0.00163111	0.083	2970	tags=47%, list=5%, signal=49%
GO_T_CELL_LINEAGE_COMMITMENT	GO_T_CELL_LINEAGE_COMMITMENT		26	0.81669915	2.0579123	0	0.001773341	0.088	1732	tags=54%, list=3%, signal=56%
GO_LEUKOCYTE_MEDIATED_IMMUNITY	GO_LEUKOCYTE_MEDIATED_IMMUNITY		860	0.5696131	2.054957	0.001763668	0.001822243	0.091	4696	tags=35%, list=9%, signal=38%
GO_POSITIVE_REGULATION_OF_CD4_POSITIVE_ALPHA_BETA_T_CELL_ACTIVATION	GO_POSITIVE_REGULATION_OF_CD4_POSITIVE_ALPHA_BETA_T_CELL_ACTIVATION		33	0.7566065	2.052044	0	0.001953366	0.097	2970	tags=58%, list=5%, signal=61%
GO_LYMPHOCYTE_CHEMOTAXIS	GO_LYMPHOCYTE_CHEMOTAXIS		61	0.6876405	2.0513136	0	0.001987396	0.099	5633	tags=49%, list=10%, signal=55%
GO_GRANULOCYTE_MIGRATION	GO_GRANULOCYTE_MIGRATION		133	0.6513476	2.0500183	0	0.001996135	0.099	8214	tags=50%, list=15%, signal=59%
GO_FC_RECEPTOR_MEDIATED_STIMULATORY_SIGNALING_PATHWAY	GO_FC_RECEPTOR_MEDIATED_STIMULATORY_SIGNALING_PATHWAY		143	0.74238163	2.0496666	0	0.002005382	0.1	2805	tags=51%, list=5%, signal=54%
GO_POSITIVE_REGULATION_OF_LEUKOCYTE_MEDIATED_IMMUNITY	GO_POSITIVE_REGULATION_OF_LEUKOCYTE_MEDIATED_IMMUNITY		132	0.61130595	2.0492582	0.001795332	0.001996821	0.101	4130	tags=37%, list=7%, signal=40%
GO_REGULATION_OF_LYMPHOCYTE_MEDIATED_IMMUNITY	GO_REGULATION_OF_LYMPHOCYTE_MEDIATED_IMMUNITY		150	0.6271217	2.0484614	0.00177305	0.002039131	0.102	6358	tags=45%, list=12%, signal=50%
GO_INTERLEUKIN_17_PRODUCTION	GO_INTERLEUKIN_17_PRODUCTION		31	0.7566881	2.0472746	0	0.002036264	0.103	4255	tags=52%, list=8%, signal=56%
GO_RESPONSE_TO_INTERFERON_GAMMA	GO_RESPONSE_TO_INTERFERON_GAMMA		194	0.6107868	2.047257	0	0.002019008	0.103	8566	tags=51%, list=16%, signal=60%
GO_IMMUNOGLOBULIN_PRODUCTION	GO_IMMUNOGLOBULIN_PRODUCTION		185	0.73582137	2.0472445	0.001739131	0.002002042	0.103	3680	tags=52%, list=7%, signal=56%
GO_NEGATIVE_REGULATION_OF_IMMUNE_RESPONSE	GO_NEGATIVE_REGULATION_OF_IMMUNE_RESPONSE		139	0.6033203	2.0463612	0	0.002007922	0.103	8822	tags=51%, list=16%, signal=61%
GO_B_CELL_HOMEOSTASIS	GO_B_CELL_HOMEOSTASIS		30	0.7287261	2.0456328	0	0.002033091	0.106	6544	tags=53%, list=12%, signal=60%
GO_CYTOKINE_PRODUCTION	GO_CYTOKINE_PRODUCTION		749	0.537832	2.0451045	0	0.002043546	0.108	7206	tags=38%, list=13%, signal=43%
GO_T_HELPER_1_TYPE_IMMUNE_RESPONSE	GO_T_HELPER_1_TYPE_IMMUNE_RESPONSE		41	0.72055185	2.044748	0	0.002047823	0.108	8822	tags=61%, list=16%, signal=73%
GO_NEGATIVE_REGULATION_OF_IMMUNE_SYSTEM_PROCESS	GO_NEGATIVE_REGULATION_OF_IMMUNE_SYSTEM_PROCESS		445	0.5569291	2.043766	0.001769912	0.002064616	0.108	6374	tags=38%, list=12%, signal=43%
GO_POSITIVE_REGULATION_OF_HEMOPOIESIS	GO_POSITIVE_REGULATION_OF_HEMOPOIESIS		180	0.59186745	2.0380893	0	0.002199615	0.112	3914	tags=32%, list=7%, signal=35%
GO_POSITIVE_REGULATION_OF_B_CELL_PROLIFERATION	GO_POSITIVE_REGULATION_OF_B_CELL_PROLIFERATION		40	0.71330386	2.0377548	0	0.002196816	0.112	4735	tags=50%, list=9%, signal=55%
GO_REGULATION_OF_NATURAL_KILLER_CELL_MEDIATED_IMMUNITY	GO_REGULATION_OF_NATURAL_KILLER_CELL_MEDIATED_IMMUNITY		47	0.73613286	2.0360591	0	0.002271357	0.117	4553	tags=55%, list=8%, signal=60%
GO_POSITIVE_REGULATION_OF_TOLL_LIKE_RECEPTOR_4_SIGNALING_PATHWAY	GO_POSITIVE_REGULATION_OF_TOLL_LIKE_RECEPTOR_4_SIGNALING_PATHWAY		9	0.90094554	2.035342	0	0.002274836	0.117	4683	tags=78%, list=8%, signal=85%
GO_TUMOR_NECROSIS_FACTOR_SUPERFAMILY_CYTOKINE_PRODUCTION	GO_TUMOR_NECROSIS_FACTOR_SUPERFAMILY_CYTOKINE_PRODUCTION		145	0.60976577	2.0342565	0	0.002307866	0.118	7650	tags=47%, list=14%, signal=54%
GO_POSITIVE_REGULATION_OF_IMMUNE_EFFECTOR_PROCESS	GO_POSITIVE_REGULATION_OF_IMMUNE_EFFECTOR_PROCESS		212	0.58922184	2.0329998	0.001814882	0.002394346	0.122	5579	tags=39%, list=10%, signal=43%
GO_RESPONSE_TO_PROTOZOAN	GO_RESPONSE_TO_PROTOZOAN		20	0.7857847	2.0326283	0	0.00239527	0.123	6948	tags=55%, list=13%, signal=63%
GO_T_HELPER_17_CELL_LINEAGE_COMMITMENT	GO_T_HELPER_17_CELL_LINEAGE_COMMITMENT		12	0.9559789	2.0309086	0	0.002460525	0.126	1732	tags=75%, list=3%, signal=77%
GO_PHAGOCYTOSIS_RECOGNITION	GO_PHAGOCYTOSIS_RECOGNITION		73	0.8785987	2.0305915	0	0.00246827	0.128	2238	tags=75%, list=4%, signal=78%
GO_CD4_POSITIVE_ALPHA_BETA_T_CELL_LINEAGE_COMMITMENT	GO_CD4_POSITIVE_ALPHA_BETA_T_CELL_LINEAGE_COMMITMENT		17	0.88876224	2.029849	0	0.002473959	0.13	1732	tags=65%, list=3%, signal=67%
GO_REGULATION_OF_HUMORAL_IMMUNE_RESPONSE	GO_REGULATION_OF_HUMORAL_IMMUNE_RESPONSE		130	0.7672613	2.0293345	0	0.002480855	0.13	6623	tags=68%, list=12%, signal=77%
GO_POSITIVE_REGULATION_OF_LEUKOCYTE_DIFFERENTIATION	GO_POSITIVE_REGULATION_OF_LEUKOCYTE_DIFFERENTIATION		140	0.62712264	2.0290828	0	0.002468064	0.13	3757	tags=36%, list=7%, signal=39%
GO_INTERLEUKIN_12_PRODUCTION	GO_INTERLEUKIN_12_PRODUCTION		53	0.71235305	2.0286107	0	0.002463612	0.13	6270	tags=53%, list=11%, signal=60%
GO_NEGATIVE_REGULATION_OF_CD4_POSITIVE_ALPHA_BETA_T_CELL_DIFFERENTIATION	GO_NEGATIVE_REGULATION_OF_CD4_POSITIVE_ALPHA_BETA_T_CELL_DIFFERENTIATION		20	0.78202945	2.0263276	0	0.002586901	0.135	8064	tags=65%, list=15%, signal=76%
GO_LYMPHOCYTE_COSTIMULATION	GO_LYMPHOCYTE_COSTIMULATION		56	0.71303993	2.0261245	0.001834862	0.002577937	0.136	2725	tags=48%, list=5%, signal=51%
GO_REGULATION_OF_LYMPHOCYTE_CHEMOTAXIS	GO_REGULATION_OF_LYMPHOCYTE_CHEMOTAXIS		26	0.72535646	2.0254707	0	0.002606516	0.139	5617	tags=46%, list=10%, signal=51%
GO_POSITIVE_REGULATION_OF_REGULATORY_T_CELL_DIFFERENTIATION	GO_POSITIVE_REGULATION_OF_REGULATORY_T_CELL_DIFFERENTIATION		13	0.88462806	2.024867	0	0.002605672	0.139	1920	tags=62%, list=3%, signal=64%
GO_POSITIVE_REGULATION_OF_LEUKOCYTE_APOPTOTIC_PROCESS	GO_POSITIVE_REGULATION_OF_LEUKOCYTE_APOPTOTIC_PROCESS		27	0.7056074	2.02479	0.001869159	0.002587322	0.139	6122	tags=48%, list=11%, signal=54%
GO_ACTIVATION_OF_JANUS_KINASE_ACTIVITY	GO_ACTIVATION_OF_JANUS_KINASE_ACTIVITY		15	0.7926375	2.024713	0	0.002569229	0.139	2733	tags=47%, list=5%, signal=49%
GO_REGULATION_OF_LEUKOCYTE_APOPTOTIC_PROCESS	GO_REGULATION_OF_LEUKOCYTE_APOPTOTIC_PROCESS		85	0.6080404	2.0234115	0.001782531	0.002635988	0.141	6216	tags=45%, list=11%, signal=50%
GO_PRODUCTION_OF_MOLECULAR_MEDIATOR_INVOLVED_IN_INFLAMMATORY_RESPONSE	GO_PRODUCTION_OF_MOLECULAR_MEDIATOR_INVOLVED_IN_INFLAMMATORY_RESPONSE		67	0.60012645	2.0226905	0	0.002647859	0.141	7624	tags=45%, list=14%, signal=52%
GO_FC_RECEPTOR_SIGNALING_PATHWAY	GO_FC_RECEPTOR_SIGNALING_PATHWAY		240	0.6225998	2.0207262	0.001763668	0.0027199	0.144	5441	tags=46%, list=10%, signal=51%
GO_POSITIVE_REGULATION_OF_CYTOKINE_BIOSYNTHETIC_PROCESS	GO_POSITIVE_REGULATION_OF_CYTOKINE_BIOSYNTHETIC_PROCESS		61	0.6957717	2.0205526	0	0.002707004	0.144	4932	tags=51%, list=9%, signal=56%
GO_REGULATION_OF_T_HELPER_17_TYPE_IMMUNE_RESPONSE	GO_REGULATION_OF_T_HELPER_17_TYPE_IMMUNE_RESPONSE		18	0.82281643	2.0205224	0	0.002688713	0.144	5786	tags=72%, list=10%, signal=81%
GO_REGULATION_OF_INFLAMMATORY_RESPONSE	GO_REGULATION_OF_INFLAMMATORY_RESPONSE		343	0.53373843	2.0202923	0	0.002686082	0.144	6216	tags=35%, list=11%, signal=39%
GO_POSITIVE_REGULATION_OF_LYMPHOCYTE_MEDIATED_IMMUNITY	GO_POSITIVE_REGULATION_OF_LYMPHOCYTE_MEDIATED_IMMUNITY		105	0.6298485	2.0170383	0.001785714	0.002789899	0.147	4130	tags=39%, list=7%, signal=42%
GO_POSITIVE_REGULATION_OF_RECEPTOR_SIGNALING_PATHWAY_VIA_STAT	GO_POSITIVE_REGULATION_OF_RECEPTOR_SIGNALING_PATHWAY_VIA_STAT		89	0.58522475	2.0101693	0	0.003290209	0.166	6136	tags=35%, list=11%, signal=39%
GO_LEUKOCYTE_MIGRATION_INVOLVED_IN_INFLAMMATORY_RESPONSE	GO_LEUKOCYTE_MIGRATION_INVOLVED_IN_INFLAMMATORY_RESPONSE		12	0.86703247	2.0099366	0	0.003268563	0.166	4524	tags=75%, list=8%, signal=82%
GO_NEGATIVE_REGULATION_OF_CELL_CELL_ADHESION	GO_NEGATIVE_REGULATION_OF_CELL_CELL_ADHESION		169	0.55964446	2.0094337	0	0.003291103	0.167	8499	tags=43%, list=15%, signal=50%
GO_REGULATION_OF_ACTIVATION_OF_JANUS_KINASE_ACTIVITY	GO_REGULATION_OF_ACTIVATION_OF_JANUS_KINASE_ACTIVITY		9	0.9098841	2.009013	0	0.003291763	0.167	2733	tags=67%, list=5%, signal=70%
GO_B_CELL_DIFFERENTIATION	GO_B_CELL_DIFFERENTIATION		127	0.6139278	2.0071692	0	0.003368122	0.168	4960	tags=39%, list=9%, signal=42%
GO_MYELOID_DENDRITIC_CELL_ACTIVATION	GO_MYELOID_DENDRITIC_CELL_ACTIVATION		29	0.76223665	2.0070715	0	0.003356058	0.168	3709	tags=52%, list=7%, signal=55%
GO_T_CELL_RECEPTOR_SIGNALING_PATHWAY	GO_T_CELL_RECEPTOR_SIGNALING_PATHWAY		198	0.5861718	2.0058503	0	0.003380655	0.17	3501	tags=36%, list=6%, signal=39%
GO_NEGATIVE_REGULATION_OF_NEUROINFLAMMATORY_RESPONSE	GO_NEGATIVE_REGULATION_OF_NEUROINFLAMMATORY_RESPONSE		13	0.79571074	2.0054598	0	0.003397512	0.171	4605	tags=46%, list=8%, signal=50%
GO_POSITIVE_REGULATION_OF_T_CELL_APOPTOTIC_PROCESS	GO_POSITIVE_REGULATION_OF_T_CELL_APOPTOTIC_PROCESS		13	0.79118735	2.004799	0.003745318	0.003425025	0.172	3638	tags=54%, list=7%, signal=58%
GO_LEUKOCYTE_CHEMOTAXIS	GO_LEUKOCYTE_CHEMOTAXIS		216	0.59948885	2.0047326	0	0.003414541	0.173	6965	tags=43%, list=13%, signal=49%
GO_NEGATIVE_REGULATION_OF_CD4_POSITIVE_ALPHA_BETA_T_CELL_ACTIVATION	GO_NEGATIVE_REGULATION_OF_CD4_POSITIVE_ALPHA_BETA_T_CELL_ACTIVATION		27	0.70845795	2.0044587	0	0.003421752	0.173	8064	tags=56%, list=15%, signal=65%
GO_NK_T_CELL_ACTIVATION	GO_NK_T_CELL_ACTIVATION		12	0.8306734	2.0037498	0.001934236	0.003441965	0.174	2733	tags=42%, list=5%, signal=44%
GO_CELL_CHEMOTAXIS	GO_CELL_CHEMOTAXIS		294	0.58095527	2.0026798	0	0.003471305	0.175	6965	tags=41%, list=13%, signal=46%
GO_REGULATION_OF_T_CELL_RECEPTOR_SIGNALING_PATHWAY	GO_REGULATION_OF_T_CELL_RECEPTOR_SIGNALING_PATHWAY		38	0.712056	2.0014098	0	0.00352967	0.178	4634	tags=50%, list=8%, signal=55%
GO_CYTOKINE_MEDIATED_SIGNALING_PATHWAY	GO_CYTOKINE_MEDIATED_SIGNALING_PATHWAY		776	0.51410586	2.0004194	0	0.003582614	0.182	8158	tags=40%, list=15%, signal=46%
GO_DENDRITIC_CELL_DIFFERENTIATION	GO_DENDRITIC_CELL_DIFFERENTIATION		40	0.70577556	1.9989598	0.001763668	0.003678535	0.187	1984	tags=40%, list=4%, signal=41%
GO_INFLAMMATORY_RESPONSE	GO_INFLAMMATORY_RESPONSE		706	0.53501207	1.9987016	0	0.003695139	0.188	7512	tags=39%, list=14%, signal=44%
GO_RECEPTOR_SIGNALING_PATHWAY_VIA_STAT	GO_RECEPTOR_SIGNALING_PATHWAY_VIA_STAT		157	0.5345733	1.9960693	0	0.003925859	0.196	5349	tags=31%, list=10%, signal=34%
GO_HUMORAL_IMMUNE_RESPONSE_MEDIATED_BY_CIRCULATING_IMMUNOGLOBULIN	GO_HUMORAL_IMMUNE_RESPONSE_MEDIATED_BY_CIRCULATING_IMMUNOGLOBULIN		139	0.83418524	1.9957911	0	0.003921364	0.196	2308	tags=68%, list=4%, signal=71%
GO_REGULATION_OF_RECEPTOR_SIGNALING_PATHWAY_VIA_STAT	GO_REGULATION_OF_RECEPTOR_SIGNALING_PATHWAY_VIA_STAT		136	0.52818227	1.9947115	0	0.003987393	0.2	6136	tags=30%, list=11%, signal=34%
GO_NEGATIVE_REGULATION_OF_LYMPHOCYTE_DIFFERENTIATION	GO_NEGATIVE_REGULATION_OF_LYMPHOCYTE_DIFFERENTIATION		49	0.62065583	1.9937029	0	0.004027573	0.201	8499	tags=49%, list=15%, signal=58%
GO_POSITIVE_REGULATION_OF_LYMPHOCYTE_APOPTOTIC_PROCESS	GO_POSITIVE_REGULATION_OF_LYMPHOCYTE_APOPTOTIC_PROCESS		17	0.7506454	1.9924619	0.001915709	0.004090652	0.203	6122	tags=53%, list=11%, signal=60%
GO_GAMMA_DELTA_T_CELL_ACTIVATION	GO_GAMMA_DELTA_T_CELL_ACTIVATION		15	0.8196844	1.9909519	0	0.004195995	0.206	2977	tags=60%, list=5%, signal=63%
GO_CD8_POSITIVE_ALPHA_BETA_T_CELL_DIFFERENTIATION	GO_CD8_POSITIVE_ALPHA_BETA_T_CELL_DIFFERENTIATION		14	0.87741524	1.9907964	0	0.004177026	0.206	2232	tags=71%, list=4%, signal=74%
GO_NEGATIVE_REGULATION_OF_T_CELL_DIFFERENTIATION	GO_NEGATIVE_REGULATION_OF_T_CELL_DIFFERENTIATION		40	0.6516976	1.9895825	0	0.004258216	0.208	8499	tags=50%, list=15%, signal=59%
GO_T_CELL_CHEMOTAXIS	GO_T_CELL_CHEMOTAXIS		27	0.7342526	1.9889634	0.003752345	0.004286605	0.212	5633	tags=52%, list=10%, signal=58%
GO_REGULATION_OF_NK_T_CELL_ACTIVATION	GO_REGULATION_OF_NK_T_CELL_ACTIVATION		10	0.8536626	1.9888294	0.001912046	0.004285103	0.213	2733	tags=50%, list=5%, signal=53%
GO_COMPLEMENT_ACTIVATION	GO_COMPLEMENT_ACTIVATION		161	0.78380793	1.988802	0	0.004261029	0.213	5441	tags=67%, list=10%, signal=74%
GO_POSITIVE_REGULATION_OF_TUMOR_NECROSIS_FACTOR_SUPERFAMILY_CYTOKINE_PRODUCTION	GO_POSITIVE_REGULATION_OF_TUMOR_NECROSIS_FACTOR_SUPERFAMILY_CYTOKINE_PRODUCTION		81	0.63653624	1.9886469	0.003663004	0.004252601	0.214	5324	tags=42%, list=10%, signal=46%
GO_POSITIVE_REGULATION_OF_ALPHA_BETA_T_CELL_PROLIFERATION	GO_POSITIVE_REGULATION_OF_ALPHA_BETA_T_CELL_PROLIFERATION		19	0.8151302	1.986684	0.001821494	0.004428688	0.216	1591	tags=53%, list=3%, signal=54%
GO_REGULATION_OF_DEFENSE_RESPONSE	GO_REGULATION_OF_DEFENSE_RESPONSE		749	0.50465393	1.9837247	0.001724138	0.004659724	0.223	8747	tags=39%, list=16%, signal=46%
GO_REGULATION_OF_T_CELL_MIGRATION	GO_REGULATION_OF_T_CELL_MIGRATION		42	0.65911204	1.9827135	0.003663004	0.004727021	0.224	5617	tags=48%, list=10%, signal=53%
GO_CD8_POSITIVE_ALPHA_BETA_T_CELL_ACTIVATION	GO_CD8_POSITIVE_ALPHA_BETA_T_CELL_ACTIVATION		23	0.75197434	1.9823642	0	0.004734681	0.225	2232	tags=52%, list=4%, signal=54%
GO_INTERFERON_GAMMA_MEDIATED_SIGNALING_PATHWAY	GO_INTERFERON_GAMMA_MEDIATED_SIGNALING_PATHWAY		88	0.6829339	1.9814146	0.0056926	0.004813124	0.228	8425	tags=60%, list=15%, signal=71%
GO_NEGATIVE_REGULATION_OF_B_CELL_ACTIVATION	GO_NEGATIVE_REGULATION_OF_B_CELL_ACTIVATION		31	0.74591815	1.981277	0	0.004796501	0.229	3788	tags=55%, list=7%, signal=59%
GO_POSITIVE_REGULATION_OF_TYROSINE_PHOSPHORYLATION_OF_STAT_PROTEIN	GO_POSITIVE_REGULATION_OF_TYROSINE_PHOSPHORYLATION_OF_STAT_PROTEIN		68	0.5816301	1.9810351	0	0.004775701	0.23	6136	tags=34%, list=11%, signal=38%
GO_FC_EPSILON_RECEPTOR_SIGNALING_PATHWAY	GO_FC_EPSILON_RECEPTOR_SIGNALING_PATHWAY		168	0.64507824	1.9772129	0.003539823	0.005128803	0.239	2725	tags=42%, list=5%, signal=44%
GO_POSITIVE_REGULATION_OF_INTERLEUKIN_17_PRODUCTION	GO_POSITIVE_REGULATION_OF_INTERLEUKIN_17_PRODUCTION		14	0.84933066	1.975544	0.001851852	0.005242246	0.244	2295	tags=57%, list=4%, signal=60%
GO_NEGATIVE_REGULATION_OF_INNATE_IMMUNE_RESPONSE	GO_NEGATIVE_REGULATION_OF_INNATE_IMMUNE_RESPONSE		52	0.65130174	1.9749161	0.003802281	0.005305532	0.246	8589	tags=54%, list=16%, signal=64%
GO_REGULATION_OF_LYMPHOCYTE_APOPTOTIC_PROCESS	GO_REGULATION_OF_LYMPHOCYTE_APOPTOTIC_PROCESS		55	0.6039345	1.9747478	0.001745201	0.005302805	0.248	6122	tags=42%, list=11%, signal=47%
GO_CYTOKINE_METABOLIC_PROCESS	GO_CYTOKINE_METABOLIC_PROCESS		110	0.5946076	1.9734807	0	0.005376255	0.252	5140	tags=41%, list=9%, signal=45%
GO_POSITIVE_REGULATION_OF_RESPONSE_TO_EXTERNAL_STIMULUS	GO_POSITIVE_REGULATION_OF_RESPONSE_TO_EXTERNAL_STIMULUS		304	0.540455	1.9719136	0	0.005460261	0.253	5624	tags=34%, list=10%, signal=38%
GO_NK_T_CELL_PROLIFERATION	GO_NK_T_CELL_PROLIFERATION		7	0.9213092	1.9713773	0	0.005452822	0.253	2132	tags=57%, list=4%, signal=59%
GO_MAST_CELL_MEDIATED_IMMUNITY	GO_MAST_CELL_MEDIATED_IMMUNITY		47	0.6547362	1.971076	0.003649635	0.005441011	0.254	7259	tags=53%, list=13%, signal=61%
GO_REGULATION_OF_MAST_CELL_ACTIVATION	GO_REGULATION_OF_MAST_CELL_ACTIVATION		40	0.6672353	1.9686877	0.001766785	0.005620081	0.26	7259	tags=50%, list=13%, signal=58%
GO_NEGATIVE_REGULATION_OF_DEFENSE_RESPONSE	GO_NEGATIVE_REGULATION_OF_DEFENSE_RESPONSE		211	0.52245903	1.9686761	0.00174216	0.005591407	0.26	8642	tags=41%, list=16%, signal=48%
GO_POSITIVE_REGULATION_OF_NATURAL_KILLER_CELL_MEDIATED_IMMUNITY	GO_POSITIVE_REGULATION_OF_NATURAL_KILLER_CELL_MEDIATED_IMMUNITY		34	0.7152434	1.9677773	0.001805054	0.005646096	0.263	4006	tags=50%, list=7%, signal=54%
GO_NEGATIVE_REGULATION_OF_CYTOKINE_SECRETION	GO_NEGATIVE_REGULATION_OF_CYTOKINE_SECRETION		64	0.6296032	1.9666977	0	0.005694063	0.267	8345	tags=55%, list=15%, signal=64%
GO_NEGATIVE_REGULATION_OF_ALPHA_BETA_T_CELL_ACTIVATION	GO_NEGATIVE_REGULATION_OF_ALPHA_BETA_T_CELL_ACTIVATION		37	0.68235004	1.9641366	0	0.005928255	0.28	4243	tags=46%, list=8%, signal=50%
GO_REGULATION_OF_CD8_POSITIVE_ALPHA_BETA_T_CELL_DIFFERENTIATION	GO_REGULATION_OF_CD8_POSITIVE_ALPHA_BETA_T_CELL_DIFFERENTIATION		6	0.94044024	1.9634703	0	0.00597982	0.285	2132	tags=67%, list=4%, signal=69%
GO_NEGATIVE_REGULATION_OF_IMMUNE_EFFECTOR_PROCESS	GO_NEGATIVE_REGULATION_OF_IMMUNE_EFFECTOR_PROCESS		117	0.57469434	1.9626437	0.001821494	0.006045506	0.29	8345	tags=48%, list=15%, signal=56%
GO_NEGATIVE_REGULATION_OF_LEUKOCYTE_MEDIATED_IMMUNITY	GO_NEGATIVE_REGULATION_OF_LEUKOCYTE_MEDIATED_IMMUNITY		49	0.6659699	1.9602154	0	0.006203797	0.295	7459	tags=55%, list=14%, signal=64%
GO_NEGATIVE_REGULATION_OF_T_CELL_RECEPTOR_SIGNALING_PATHWAY	GO_NEGATIVE_REGULATION_OF_T_CELL_RECEPTOR_SIGNALING_PATHWAY		20	0.728343	1.959854	0.001865672	0.006195803	0.296	4634	tags=55%, list=8%, signal=60%
GO_NATURAL_KILLER_CELL_CHEMOTAXIS	GO_NATURAL_KILLER_CELL_CHEMOTAXIS		11	0.8705196	1.9588897	0	0.00628208	0.3	2610	tags=64%, list=5%, signal=67%
GO_NEGATIVE_REGULATION_OF_I_KAPPAB_KINASE_NF_KAPPAB_SIGNALING	GO_NEGATIVE_REGULATION_OF_I_KAPPAB_KINASE_NF_KAPPAB_SIGNALING		44	0.60849375	1.9584363	0	0.006292126	0.303	11130	tags=50%, list=20%, signal=63%
GO_NEGATIVE_REGULATION_OF_T_HELPER_CELL_DIFFERENTIATION	GO_NEGATIVE_REGULATION_OF_T_HELPER_CELL_DIFFERENTIATION		16	0.79172033	1.9577066	0	0.006329767	0.306	8064	tags=75%, list=15%, signal=88%
GO_CELLULAR_EXTRAVASATION	GO_CELLULAR_EXTRAVASATION		57	0.6982679	1.957549	0.001886793	0.006312326	0.306	4704	tags=47%, list=9%, signal=52%
GO_REGULATION_OF_INTERFERON_GAMMA_SECRETION	GO_REGULATION_OF_INTERFERON_GAMMA_SECRETION		11	0.87087405	1.9572932	0	0.006314157	0.307	3794	tags=82%, list=7%, signal=88%
GO_REGULATION_OF_B_CELL_RECEPTOR_SIGNALING_PATHWAY	GO_REGULATION_OF_B_CELL_RECEPTOR_SIGNALING_PATHWAY		27	0.83424646	1.9572339	0	0.006283946	0.307	4596	tags=70%, list=8%, signal=77%
GO_NEGATIVE_REGULATION_OF_INTERLEUKIN_6_PRODUCTION	GO_NEGATIVE_REGULATION_OF_INTERLEUKIN_6_PRODUCTION		41	0.71795434	1.954145	0	0.006552371	0.314	8369	tags=68%, list=15%, signal=80%
GO_NATURAL_KILLER_CELL_DIFFERENTIATION	GO_NATURAL_KILLER_CELL_DIFFERENTIATION		22	0.7094774	1.9537122	0	0.006579235	0.316	4922	tags=50%, list=9%, signal=55%
GO_POSITIVE_REGULATION_OF_INTERLEUKIN_6_PRODUCTION	GO_POSITIVE_REGULATION_OF_INTERLEUKIN_6_PRODUCTION		86	0.5919155	1.9526592	0	0.006671683	0.32	4333	tags=36%, list=8%, signal=39%
GO_INTERLEUKIN_2_PRODUCTION	GO_INTERLEUKIN_2_PRODUCTION		63	0.6363927	1.9518868	0	0.006724179	0.321	3794	tags=37%, list=7%, signal=39%
GO_NEGATIVE_REGULATION_OF_CELL_KILLING	GO_NEGATIVE_REGULATION_OF_CELL_KILLING		21	0.7398679	1.9506892	0.001848429	0.006821639	0.324	7459	tags=62%, list=14%, signal=72%
GO_REGULATION_OF_GLIAL_CELL_MIGRATION	GO_REGULATION_OF_GLIAL_CELL_MIGRATION		16	0.78555787	1.94817	0.001845019	0.006997957	0.333	2275	tags=44%, list=4%, signal=46%
GO_NEGATIVE_REGULATION_OF_CYTOKINE_PRODUCTION	GO_NEGATIVE_REGULATION_OF_CYTOKINE_PRODUCTION		269	0.52944046	1.9480088	0	0.006973312	0.333	7691	tags=40%, list=14%, signal=46%
GO_POSITIVE_REGULATION_OF_DEFENSE_RESPONSE	GO_POSITIVE_REGULATION_OF_DEFENSE_RESPONSE		497	0.50073296	1.947597	0.001724138	0.006959954	0.333	7307	tags=37%, list=13%, signal=42%
GO_REGULATION_OF_DENDRITIC_CELL_DIFFERENTIATION	GO_REGULATION_OF_DENDRITIC_CELL_DIFFERENTIATION		11	0.90212595	1.9468126	0	0.006993596	0.335	1984	tags=64%, list=4%, signal=66%
GO_REGULATION_OF_B_CELL_DIFFERENTIATION	GO_REGULATION_OF_B_CELL_DIFFERENTIATION		28	0.739872	1.9450485	0.001904762	0.007192208	0.345	3885	tags=54%, list=7%, signal=58%
GO_LYMPHOCYTE_HOMEOSTASIS	GO_LYMPHOCYTE_HOMEOSTASIS		62	0.6459134	1.9449253	0	0.007173955	0.345	2961	tags=40%, list=5%, signal=43%
GO_POSITIVE_REGULATION_OF_T_HELPER_1_TYPE_IMMUNE_RESPONSE	GO_POSITIVE_REGULATION_OF_T_HELPER_1_TYPE_IMMUNE_RESPONSE		20	0.751	1.9441359	0	0.007220554	0.348	2386	tags=45%, list=4%, signal=47%
GO_CYTOKINE_SECRETION	GO_CYTOKINE_SECRETION		217	0.55385834	1.9439901	0	0.007214014	0.349	8504	tags=43%, list=15%, signal=50%
GO_NEGATIVE_REGULATION_OF_INTERLEUKIN_1_PRODUCTION	GO_NEGATIVE_REGULATION_OF_INTERLEUKIN_1_PRODUCTION		28	0.67060417	1.9411178	0	0.007522098	0.358	8092	tags=54%, list=15%, signal=63%
GO_REGULATION_OF_ADAPTIVE_IMMUNE_RESPONSE	GO_REGULATION_OF_ADAPTIVE_IMMUNE_RESPONSE		158	0.5915108	1.9407762	0.001808318	0.007524778	0.358	9187	tags=49%, list=17%, signal=59%
GO_LEUKOCYTE_ADHESION_TO_VASCULAR_ENDOTHELIAL_CELL	GO_LEUKOCYTE_ADHESION_TO_VASCULAR_ENDOTHELIAL_CELL		38	0.69179994	1.9391103	0.003745318	0.007683748	0.364	4704	tags=42%, list=9%, signal=46%
GO_POSITIVE_REGULATION_OF_T_HELPER_17_CELL_DIFFERENTIATION	GO_POSITIVE_REGULATION_OF_T_HELPER_17_CELL_DIFFERENTIATION		7	0.95643884	1.9379301	0	0.007745122	0.365	1380	tags=71%, list=3%, signal=73%
GO_POSITIVE_REGULATION_OF_GRANULOCYTE_CHEMOTAXIS	GO_POSITIVE_REGULATION_OF_GRANULOCYTE_CHEMOTAXIS		25	0.71437615	1.9370508	0.001862197	0.00783114	0.368	6216	tags=56%, list=11%, signal=63%
GO_G_PROTEIN_COUPLED_PURINERGIC_NUCLEOTIDE_RECEPTOR_SIGNALING_PATHWAY	GO_G_PROTEIN_COUPLED_PURINERGIC_NUCLEOTIDE_RECEPTOR_SIGNALING_PATHWAY		14	0.8357864	1.9368165	0.001855288	0.007816793	0.369	1407	tags=57%, list=3%, signal=59%
GO_REGULATION_OF_INNATE_IMMUNE_RESPONSE	GO_REGULATION_OF_INNATE_IMMUNE_RESPONSE		435	0.5132379	1.9361407	0.003478261	0.007854635	0.37	7307	tags=39%, list=13%, signal=44%
GO_CELLULAR_RESPONSE_TO_BIOTIC_STIMULUS	GO_CELLULAR_RESPONSE_TO_BIOTIC_STIMULUS		228	0.5410306	1.9354134	0	0.007909807	0.375	7071	tags=38%, list=13%, signal=43%
GO_INTERLEUKIN_10_PRODUCTION	GO_INTERLEUKIN_10_PRODUCTION		49	0.6570019	1.9343941	0.001805054	0.008009107	0.38	5963	tags=51%, list=11%, signal=57%
GO_NEGATIVE_REGULATION_OF_LEUKOCYTE_DIFFERENTIATION	GO_NEGATIVE_REGULATION_OF_LEUKOCYTE_DIFFERENTIATION		98	0.5642012	1.9341573	0	0.007995171	0.381	6973	tags=40%, list=13%, signal=45%
GO_LEUKOCYTE_TETHERING_OR_ROLLING	GO_LEUKOCYTE_TETHERING_OR_ROLLING		25	0.7594983	1.9341354	0.001851852	0.007966564	0.381	8345	tags=68%, list=15%, signal=80%
GO_POSITIVE_REGULATION_OF_INTERLEUKIN_10_PRODUCTION	GO_POSITIVE_REGULATION_OF_INTERLEUKIN_10_PRODUCTION		31	0.6737319	1.9339584	0.001769912	0.007949756	0.382	4991	tags=52%, list=9%, signal=57%
GO_ACTIVATED_T_CELL_PROLIFERATION	GO_ACTIVATED_T_CELL_PROLIFERATION		42	0.62110716	1.9294062	0	0.008598949	0.41	6544	tags=45%, list=12%, signal=51%
GO_NEGATIVE_REGULATION_OF_ALPHA_BETA_T_CELL_DIFFERENTIATION	GO_NEGATIVE_REGULATION_OF_ALPHA_BETA_T_CELL_DIFFERENTIATION		24	0.72570264	1.9291347	0	0.008608574	0.412	8064	tags=58%, list=15%, signal=68%
GO_POSITIVE_REGULATION_OF_CELL_ADHESION	GO_POSITIVE_REGULATION_OF_CELL_ADHESION		395	0.5464904	1.9285058	0.001838235	0.008632864	0.415	6216	tags=35%, list=11%, signal=39%
GO_LEUKOCYTE_APOPTOTIC_PROCESS	GO_LEUKOCYTE_APOPTOTIC_PROCESS		105	0.56300974	1.9278994	0.005291005	0.00870814	0.421	6216	tags=40%, list=11%, signal=45%
GO_NEGATIVE_REGULATION_OF_ADAPTIVE_IMMUNE_RESPONSE	GO_NEGATIVE_REGULATION_OF_ADAPTIVE_IMMUNE_RESPONSE		45	0.6462427	1.9263821	0	0.008892783	0.427	6948	tags=51%, list=13%, signal=58%
GO_MYD88_DEPENDENT_TOLL_LIKE_RECEPTOR_SIGNALING_PATHWAY	GO_MYD88_DEPENDENT_TOLL_LIKE_RECEPTOR_SIGNALING_PATHWAY		36	0.6861571	1.9249506	0	0.00902798	0.429	4809	tags=53%, list=9%, signal=58%
GO_POSITIVE_REGULATION_OF_ACTIVATION_OF_JANUS_KINASE_ACTIVITY	GO_POSITIVE_REGULATION_OF_ACTIVATION_OF_JANUS_KINASE_ACTIVITY		7	0.90477556	1.9248253	0	0.009023863	0.431	2185	tags=57%, list=4%, signal=59%
GO_NEGATIVE_REGULATION_OF_VIRAL_PROCESS	GO_NEGATIVE_REGULATION_OF_VIRAL_PROCESS		97	0.5820012	1.9222778	0	0.009326137	0.439	10069	tags=53%, list=18%, signal=64%
GO_NEGATIVE_REGULATION_OF_INFLAMMATORY_RESPONSE	GO_NEGATIVE_REGULATION_OF_INFLAMMATORY_RESPONSE		148	0.51729506	1.9220226	0.001677852	0.009314506	0.44	5159	tags=33%, list=9%, signal=36%
GO_REGULATION_OF_PRODUCTION_OF_MOLECULAR_MEDIATOR_OF_IMMUNE_RESPONSE	GO_REGULATION_OF_PRODUCTION_OF_MOLECULAR_MEDIATOR_OF_IMMUNE_RESPONSE		140	0.56283784	1.921909	0.001779359	0.009285553	0.44	9187	tags=44%, list=17%, signal=53%
GO_IMMUNOLOGICAL_MEMORY_PROCESS	GO_IMMUNOLOGICAL_MEMORY_PROCESS		11	0.82824576	1.9215981	0	0.009290121	0.442	5409	tags=55%, list=10%, signal=60%
GO_REGULATION_OF_LEUKOCYTE_DEGRANULATION	GO_REGULATION_OF_LEUKOCYTE_DEGRANULATION		44	0.63239646	1.9213336	0.001851852	0.009308395	0.443	7259	tags=45%, list=13%, signal=52%
GO_CHEMOKINE_SECRETION	GO_CHEMOKINE_SECRETION		19	0.70177114	1.9213336	0	0.009270709	0.443	10505	tags=58%, list=19%, signal=71%
GO_PATTERN_RECOGNITION_RECEPTOR_SIGNALING_PATHWAY	GO_PATTERN_RECOGNITION_RECEPTOR_SIGNALING_PATHWAY		192	0.5342704	1.9213119	0	0.009236839	0.443	5354	tags=36%, list=10%, signal=40%
GO_INTERFERON_GAMMA_SECRETION	GO_INTERFERON_GAMMA_SECRETION		18	0.7585747	1.9201151	0.001937985	0.00938552	0.449	6764	tags=67%, list=12%, signal=76%
GO_REGULATION_OF_RESPONSE_TO_CYTOKINE_STIMULUS	GO_REGULATION_OF_RESPONSE_TO_CYTOKINE_STIMULUS		171	0.52236104	1.9193732	0.003533569	0.009468964	0.455	6889	tags=37%, list=12%, signal=43%
GO_REGULATION_OF_CD8_POSITIVE_ALPHA_BETA_T_CELL_ACTIVATION	GO_REGULATION_OF_CD8_POSITIVE_ALPHA_BETA_T_CELL_ACTIVATION		15	0.7323799	1.9190919	0	0.00946233	0.455	2232	tags=47%, list=4%, signal=49%
GO_INTERLEUKIN_8_PRODUCTION	GO_INTERLEUKIN_8_PRODUCTION		72	0.5853556	1.917806	0.001792115	0.009644112	0.459	6122	tags=42%, list=11%, signal=47%
GO_RESPONSE_TO_MOLECULE_OF_BACTERIAL_ORIGIN	GO_RESPONSE_TO_MOLECULE_OF_BACTERIAL_ORIGIN		336	0.5188027	1.9150827	0	0.009982984	0.471	7399	tags=36%, list=13%, signal=41%
GO_NEUROINFLAMMATORY_RESPONSE	GO_NEUROINFLAMMATORY_RESPONSE		63	0.6041905	1.9147025	0.001811594	0.009987797	0.471	4644	tags=37%, list=8%, signal=40%
GO_REGULATION_OF_RESPIRATORY_BURST	GO_REGULATION_OF_RESPIRATORY_BURST		16	0.72478014	1.9142556	0	0.009990069	0.473	5615	tags=44%, list=10%, signal=49%
GO_TYROSINE_PHOSPHORYLATION_OF_STAT_PROTEIN	GO_TYROSINE_PHOSPHORYLATION_OF_STAT_PROTEIN		81	0.5510116	1.913126	0	0.010100544	0.479	4571	tags=30%, list=8%, signal=32%
GO_REGULATION_OF_OSTEOCLAST_DIFFERENTIATION	GO_REGULATION_OF_OSTEOCLAST_DIFFERENTIATION		64	0.61680424	1.9130979	0	0.010061242	0.479	4255	tags=34%, list=8%, signal=37%
GO_POSITIVE_REGULATION_OF_INTERLEUKIN_2_PRODUCTION	GO_POSITIVE_REGULATION_OF_INTERLEUKIN_2_PRODUCTION		30	0.73741853	1.9127871	0.003696858	0.010056917	0.479	2970	tags=43%, list=5%, signal=46%
GO_NEGATIVE_REGULATION_OF_INTERLEUKIN_1_BETA_PRODUCTION	GO_NEGATIVE_REGULATION_OF_INTERLEUKIN_1_BETA_PRODUCTION		22	0.6761581	1.9116473	0.001697793	0.010186999	0.482	8092	tags=50%, list=15%, signal=59%
GO_REGULATION_OF_LEUKOCYTE_MIGRATION	GO_REGULATION_OF_LEUKOCYTE_MIGRATION		183	0.54892075	1.9114513	0.001792115	0.01017	0.482	6216	tags=36%, list=11%, signal=41%
GO_REGULATION_OF_RESPONSE_TO_BIOTIC_STIMULUS	GO_REGULATION_OF_RESPONSE_TO_BIOTIC_STIMULUS		136	0.5275317	1.9098322	0.001782531	0.010356423	0.485	7194	tags=37%, list=13%, signal=42%
GO_ENDOCYTOSIS	GO_ENDOCYTOSIS		636	0.5336954	1.9092239	0.001757469	0.010400023	0.488	8961	tags=41%, list=16%, signal=48%
GO_REGULATION_OF_CELL_ADHESION	GO_REGULATION_OF_CELL_ADHESION		670	0.5143658	1.9085369	0.003539823	0.01045572	0.49	6390	tags=33%, list=12%, signal=37%
GO_POSITIVE_REGULATION_OF_CELL_FATE_COMMITMENT	GO_POSITIVE_REGULATION_OF_CELL_FATE_COMMITMENT		12	0.7738588	1.908462	0	0.010425328	0.49	5314	tags=42%, list=10%, signal=46%
GO_REGULATION_OF_KILLING_OF_CELLS_OF_OTHER_ORGANISM	GO_REGULATION_OF_KILLING_OF_CELLS_OF_OTHER_ORGANISM		15	0.73018664	1.9079657	0	0.010447646	0.491	6358	tags=67%, list=12%, signal=75%
GO_IMMUNE_RESPONSE_TO_TUMOR_CELL	GO_IMMUNE_RESPONSE_TO_TUMOR_CELL		18	0.7586132	1.905259	0.001834862	0.010857582	0.501	2089	tags=56%, list=4%, signal=58%
GO_MYELOID_LEUKOCYTE_MIGRATION	GO_MYELOID_LEUKOCYTE_MIGRATION		198	0.5725786	1.9024991	0	0.011185721	0.514	8214	tags=44%, list=15%, signal=52%
GO_NEGATIVE_REGULATION_OF_ACTIVATED_T_CELL_PROLIFERATION	GO_NEGATIVE_REGULATION_OF_ACTIVATED_T_CELL_PROLIFERATION		11	0.8350454	1.9020603	0	0.011243197	0.514	6358	tags=64%, list=12%, signal=72%
GO_TUMOR_NECROSIS_FACTOR_SECRETION	GO_TUMOR_NECROSIS_FACTOR_SECRETION		24	0.67893636	1.9012842	0	0.011357603	0.518	3910	tags=46%, list=7%, signal=49%
GO_POSITIVE_REGULATION_OF_INTERLEUKIN_12_PRODUCTION	GO_POSITIVE_REGULATION_OF_INTERLEUKIN_12_PRODUCTION		32	0.70619774	1.9006646	0.001897533	0.011428199	0.519	4333	tags=44%, list=8%, signal=47%
GO_DEFENSE_RESPONSE_TO_VIRUS	GO_DEFENSE_RESPONSE_TO_VIRUS		238	0.52840453	1.9005582	0.010830325	0.011412792	0.52	9271	tags=42%, list=17%, signal=50%
GO_NEGATIVE_REGULATION_OF_TOLL_LIKE_RECEPTOR_SIGNALING_PATHWAY	GO_NEGATIVE_REGULATION_OF_TOLL_LIKE_RECEPTOR_SIGNALING_PATHWAY		39	0.6274906	1.8992758	0	0.011625623	0.524	10019	tags=54%, list=18%, signal=66%
GO_DENDRITIC_CELL_MIGRATION	GO_DENDRITIC_CELL_MIGRATION		27	0.73153627	1.8976566	0.001831502	0.011906058	0.531	2593	tags=48%, list=5%, signal=50%
GO_NEGATIVE_REGULATION_OF_EXOCYTOSIS	GO_NEGATIVE_REGULATION_OF_EXOCYTOSIS		33	0.66558397	1.8975738	0	0.011865437	0.531	3156	tags=39%, list=6%, signal=42%
GO_T_HELPER_1_CELL_DIFFERENTIATION	GO_T_HELPER_1_CELL_DIFFERENTIATION		18	0.7656428	1.896945	0	0.011936059	0.532	8064	tags=72%, list=15%, signal=85%
GO_INTERLEUKIN_4_PRODUCTION	GO_INTERLEUKIN_4_PRODUCTION		34	0.6866532	1.8952236	0.003584229	0.012225574	0.538	3764	tags=50%, list=7%, signal=54%
GO_REGULATION_OF_TOLERANCE_INDUCTION	GO_REGULATION_OF_TOLERANCE_INDUCTION		16	0.80318534	1.8946409	0.001831502	0.0122778	0.54	1994	tags=56%, list=4%, signal=58%
GO_TOLERANCE_INDUCTION	GO_TOLERANCE_INDUCTION		24	0.76577175	1.8933284	0.001801802	0.012425595	0.54	1994	tags=50%, list=4%, signal=52%
GO_INTERLEUKIN_6_SECRETION	GO_INTERLEUKIN_6_SECRETION		38	0.6335744	1.8916255	0	0.012703093	0.546	5848	tags=45%, list=11%, signal=50%
GO_RECEPTOR_MEDIATED_ENDOCYTOSIS	GO_RECEPTOR_MEDIATED_ENDOCYTOSIS		353	0.54503304	1.8911602	0.00172117	0.012755458	0.548	8705	tags=42%, list=16%, signal=50%
GO_T_CELL_DIFFERENTIATION_IN_THYMUS	GO_T_CELL_DIFFERENTIATION_IN_THYMUS		68	0.5945056	1.88866	0.003565062	0.013183804	0.562	6256	tags=40%, list=11%, signal=45%
GO_NEGATIVE_REGULATION_OF_OLIGODENDROCYTE_DIFFERENTIATION	GO_NEGATIVE_REGULATION_OF_OLIGODENDROCYTE_DIFFERENTIATION		12	0.7841895	1.8885468	0.001838235	0.013154908	0.562	9142	tags=58%, list=17%, signal=70%
GO_LEUKOCYTE_ACTIVATION_INVOLVED_IN_INFLAMMATORY_RESPONSE	GO_LEUKOCYTE_ACTIVATION_INVOLVED_IN_INFLAMMATORY_RESPONSE		41	0.65432805	1.8880129	0.003787879	0.01321185	0.564	4644	tags=44%, list=8%, signal=48%
GO_NEGATIVE_REGULATION_OF_TYPE_I_INTERFERON_PRODUCTION	GO_NEGATIVE_REGULATION_OF_TYPE_I_INTERFERON_PRODUCTION		44	0.6157054	1.8867571	0.001890359	0.013402202	0.57	7624	tags=50%, list=14%, signal=58%
GO_NEGATIVE_REGULATION_OF_LYMPHOCYTE_MEDIATED_IMMUNITY	GO_NEGATIVE_REGULATION_OF_LYMPHOCYTE_MEDIATED_IMMUNITY		39	0.64408153	1.8864304	0.001828154	0.013407956	0.571	6358	tags=49%, list=12%, signal=55%
GO_PURINERGIC_NUCLEOTIDE_RECEPTOR_SIGNALING_PATHWAY	GO_PURINERGIC_NUCLEOTIDE_RECEPTOR_SIGNALING_PATHWAY		22	0.73406047	1.8855239	0.001795332	0.013569869	0.576	2321	tags=45%, list=4%, signal=47%
GO_POSITIVE_REGULATION_OF_NK_T_CELL_ACTIVATION	GO_POSITIVE_REGULATION_OF_NK_T_CELL_ACTIVATION		8	0.85819805	1.8850638	0.001901141	0.013598566	0.578	770	tags=38%, list=1%, signal=38%
GO_NEGATIVE_REGULATION_OF_T_CELL_PROLIFERATION	GO_NEGATIVE_REGULATION_OF_T_CELL_PROLIFERATION		56	0.57921046	1.8847661	0.001763668	0.013591699	0.578	6358	tags=43%, list=12%, signal=48%
GO_INTERFERON_BETA_PRODUCTION	GO_INTERFERON_BETA_PRODUCTION		50	0.5984579	1.8844968	0	0.013576162	0.579	11130	tags=54%, list=20%, signal=68%
GO_POSITIVE_REGULATION_OF_ANTIGEN_RECEPTOR_MEDIATED_SIGNALING_PATHWAY	GO_POSITIVE_REGULATION_OF_ANTIGEN_RECEPTOR_MEDIATED_SIGNALING_PATHWAY		22	0.7669919	1.8833632	0.001865672	0.013742657	0.58	1298	tags=45%, list=2%, signal=47%
GO_REGULATION_OF_T_HELPER_1_TYPE_IMMUNE_RESPONSE	GO_REGULATION_OF_T_HELPER_1_TYPE_IMMUNE_RESPONSE		27	0.6984393	1.8822756	0.001818182	0.013895458	0.586	2386	tags=41%, list=4%, signal=43%
GO_NEGATIVE_REGULATION_OF_CELL_ADHESION	GO_NEGATIVE_REGULATION_OF_CELL_ADHESION		268	0.5134975	1.882044	0.003508772	0.013884044	0.587	6948	tags=35%, list=13%, signal=40%
GO_POSITIVE_REGULATION_OF_MYELOID_LEUKOCYTE_MEDIATED_IMMUNITY	GO_POSITIVE_REGULATION_OF_MYELOID_LEUKOCYTE_MEDIATED_IMMUNITY		30	0.6256798	1.8808695	0.001904762	0.014037807	0.589	7459	tags=47%, list=14%, signal=54%
GO_NEGATIVE_REGULATION_OF_MULTI_ORGANISM_PROCESS	GO_NEGATIVE_REGULATION_OF_MULTI_ORGANISM_PROCESS		177	0.50606817	1.8772177	0	0.014690412	0.598	7120	tags=39%, list=13%, signal=45%
GO_NEGATIVE_REGULATION_OF_T_HELPER_17_CELL_DIFFERENTIATION	GO_NEGATIVE_REGULATION_OF_T_HELPER_17_CELL_DIFFERENTIATION		9	0.8767159	1.8772043	0	0.014640614	0.598	5786	tags=89%, list=10%, signal=99%
GO_LYMPH_NODE_DEVELOPMENT	GO_LYMPH_NODE_DEVELOPMENT		16	0.75703096	1.8760957	0.001901141	0.014840868	0.601	5786	tags=63%, list=10%, signal=70%
GO_POSITIVE_REGULATION_OF_T_HELPER_CELL_DIFFERENTIATION	GO_POSITIVE_REGULATION_OF_T_HELPER_CELL_DIFFERENTIATION		20	0.72627044	1.8755913	0.005617978	0.014873886	0.601	2386	tags=50%, list=4%, signal=52%
GO_POSITIVE_REGULATION_OF_ADAPTIVE_IMMUNE_RESPONSE	GO_POSITIVE_REGULATION_OF_ADAPTIVE_IMMUNE_RESPONSE		102	0.5866565	1.8747658	0.001801802	0.014962683	0.603	4130	tags=36%, list=7%, signal=39%
GO_POSITIVE_REGULATION_OF_RESPONSE_TO_BIOTIC_STIMULUS	GO_POSITIVE_REGULATION_OF_RESPONSE_TO_BIOTIC_STIMULUS		46	0.59363407	1.8741813	0.003603604	0.015031943	0.605	6771	tags=43%, list=12%, signal=50%
GO_INFLAMMATORY_RESPONSE_TO_ANTIGENIC_STIMULUS	GO_INFLAMMATORY_RESPONSE_TO_ANTIGENIC_STIMULUS		46	0.6177526	1.8738595	0.005385996	0.015035767	0.606	8642	tags=57%, list=16%, signal=67%
GO_TOLL_LIKE_RECEPTOR_9_SIGNALING_PATHWAY	GO_TOLL_LIKE_RECEPTOR_9_SIGNALING_PATHWAY		23	0.69090706	1.8725973	0.003759399	0.015248345	0.61	11068	tags=70%, list=20%, signal=87%
GO_NEGATIVE_REGULATION_OF_LEUKOCYTE_DEGRANULATION	GO_NEGATIVE_REGULATION_OF_LEUKOCYTE_DEGRANULATION		12	0.8323611	1.872255	0	0.015273144	0.611	2733	tags=67%, list=5%, signal=70%
GO_POSITIVE_REGULATION_OF_DEFENSE_RESPONSE_TO_VIRUS_BY_HOST	GO_POSITIVE_REGULATION_OF_DEFENSE_RESPONSE_TO_VIRUS_BY_HOST		26	0.6822864	1.8715768	0.007766991	0.01534535	0.613	3657	tags=38%, list=7%, signal=41%
GO_MACROPHAGE_ACTIVATION	GO_MACROPHAGE_ACTIVATION		88	0.58005965	1.8707792	0.005545287	0.015440473	0.617	4644	tags=39%, list=8%, signal=42%
GO_REGULATION_OF_MONOCYTE_DIFFERENTIATION	GO_REGULATION_OF_MONOCYTE_DIFFERENTIATION		21	0.69465345	1.8705215	0	0.015443012	0.617	11233	tags=57%, list=20%, signal=72%
GO_REGULATION_OF_LIPID_KINASE_ACTIVITY	GO_REGULATION_OF_LIPID_KINASE_ACTIVITY		63	0.5975469	1.8703758	0.003738318	0.015424678	0.617	7307	tags=40%, list=13%, signal=46%
GO_REGULATION_OF_TOLL_LIKE_RECEPTOR_SIGNALING_PATHWAY	GO_REGULATION_OF_TOLL_LIKE_RECEPTOR_SIGNALING_PATHWAY		68	0.5766608	1.8680646	0.003472222	0.0159351	0.624	10396	tags=54%, list=19%, signal=67%
GO_POSITIVE_REGULATION_OF_CELL_ADHESION_MEDIATED_BY_INTEGRIN	GO_POSITIVE_REGULATION_OF_CELL_ADHESION_MEDIATED_BY_INTEGRIN		20	0.70343155	1.866417	0.003642987	0.016221058	0.628	5088	tags=50%, list=9%, signal=55%
GO_T_CELL_HOMEOSTASIS	GO_T_CELL_HOMEOSTASIS		37	0.64995325	1.8657387	0.003603604	0.016322026	0.63	2961	tags=43%, list=5%, signal=46%
GO_REGULATION_OF_GRANULOCYTE_CHEMOTAXIS	GO_REGULATION_OF_GRANULOCYTE_CHEMOTAXIS		42	0.62437445	1.8656489	0	0.016288841	0.63	6216	tags=43%, list=11%, signal=48%
GO_I_KAPPAB_KINASE_NF_KAPPAB_SIGNALING	GO_I_KAPPAB_KINASE_NF_KAPPAB_SIGNALING		261	0.48727185	1.8648716	0.001828154	0.016447067	0.635	7797	tags=38%, list=14%, signal=44%
GO_TYPE_I_INTERFERON_PRODUCTION	GO_TYPE_I_INTERFERON_PRODUCTION		125	0.5473521	1.8648031	0	0.016406557	0.635	7874	tags=40%, list=14%, signal=47%
GO_REGULATION_OF_CYTOKINE_PRODUCTION_INVOLVED_IN_IMMUNE_RESPONSE	GO_REGULATION_OF_CYTOKINE_PRODUCTION_INVOLVED_IN_IMMUNE_RESPONSE		82	0.58500415	1.8617064	0.001805054	0.017036093	0.646	8497	tags=45%, list=15%, signal=53%
GO_G_PROTEIN_COUPLED_PURINERGIC_RECEPTOR_SIGNALING_PATHWAY	GO_G_PROTEIN_COUPLED_PURINERGIC_RECEPTOR_SIGNALING_PATHWAY		23	0.71556705	1.861109	0.008833922	0.017109765	0.647	1465	tags=43%, list=3%, signal=45%
GO_WATER_HOMEOSTASIS	GO_WATER_HOMEOSTASIS		70	0.5506607	1.8608866	0.001733102	0.017118992	0.647	10625	tags=49%, list=19%, signal=60%
GO_POSITIVE_THYMIC_T_CELL_SELECTION	GO_POSITIVE_THYMIC_T_CELL_SELECTION		13	0.8441415	1.8605027	0	0.017172521	0.648	790	tags=62%, list=1%, signal=62%
GO_REGULATION_OF_NEUTROPHIL_ACTIVATION	GO_REGULATION_OF_NEUTROPHIL_ACTIVATION		11	0.8515578	1.8601824	0	0.017185453	0.649	4644	tags=73%, list=8%, signal=79%
GO_NEGATIVE_REGULATION_OF_NATURAL_KILLER_CELL_MEDIATED_IMMUNITY	GO_NEGATIVE_REGULATION_OF_NATURAL_KILLER_CELL_MEDIATED_IMMUNITY		15	0.7663586	1.8600444	0.007751938	0.017162638	0.649	7459	tags=67%, list=14%, signal=77%
GO_POSITIVE_REGULATION_OF_CYTOKINE_SECRETION	GO_POSITIVE_REGULATION_OF_CYTOKINE_SECRETION		130	0.53133506	1.8574411	0.005172414	0.01773929	0.656	9187	tags=39%, list=17%, signal=47%
GO_TYPE_2_IMMUNE_RESPONSE	GO_TYPE_2_IMMUNE_RESPONSE		36	0.6296169	1.8568896	0.001869159	0.01776886	0.658	8822	tags=56%, list=16%, signal=66%
GO_RESPONSE_TO_CYTOKINE	GO_RESPONSE_TO_CYTOKINE		1176	0.46133965	1.8552176	0	0.018170439	0.662	7811	tags=34%, list=14%, signal=39%
GO_GLIAL_CELL_ACTIVATION	GO_GLIAL_CELL_ACTIVATION		51	0.6050842	1.8542207	0.005555556	0.018353464	0.664	4644	tags=37%, list=8%, signal=41%
GO_REGULATION_OF_PHOSPHOLIPID_METABOLIC_PROCESS	GO_REGULATION_OF_PHOSPHOLIPID_METABOLIC_PROCESS		66	0.5802697	1.8537401	0.003669725	0.018393775	0.666	7307	tags=39%, list=13%, signal=45%
GO_IMPORT_INTO_CELL	GO_IMPORT_INTO_CELL		776	0.5037041	1.8535619	0.001724138	0.018371837	0.667	8961	tags=38%, list=16%, signal=45%
GO_NEGATIVE_REGULATION_OF_VIRAL_GENOME_REPLICATION	GO_NEGATIVE_REGULATION_OF_VIRAL_GENOME_REPLICATION		59	0.60630524	1.8510257	0.011029412	0.018949477	0.674	9929	tags=56%, list=18%, signal=68%
GO_POSITIVE_REGULATION_OF_TOLERANCE_INDUCTION	GO_POSITIVE_REGULATION_OF_TOLERANCE_INDUCTION		10	0.82827437	1.8507751	0.001858736	0.01895231	0.676	1994	tags=60%, list=4%, signal=62%
GO_REGULATION_OF_LEUKOCYTE_CHEMOTAXIS	GO_REGULATION_OF_LEUKOCYTE_CHEMOTAXIS		110	0.5492071	1.8504723	0.003623189	0.018974958	0.677	6216	tags=35%, list=11%, signal=40%
GO_T_CELL_MEDIATED_IMMUNITY	GO_T_CELL_MEDIATED_IMMUNITY		104	0.5670966	1.8494943	0.005454545	0.019181995	0.68	4696	tags=37%, list=9%, signal=40%
GO_REGULATION_OF_HEMOPOIESIS	GO_REGULATION_OF_HEMOPOIESIS		465	0.4811918	1.8487475	0.001760563	0.01933054	0.681	4255	tags=27%, list=8%, signal=29%
GO_RESPONSE_TO_TUMOR_CELL	GO_RESPONSE_TO_TUMOR_CELL		24	0.6942783	1.8478824	0.005514706	0.019510625	0.683	2089	tags=42%, list=4%, signal=43%
GO_POSITIVE_REGULATION_OF_T_HELPER_17_TYPE_IMMUNE_RESPONSE	GO_POSITIVE_REGULATION_OF_T_HELPER_17_TYPE_IMMUNE_RESPONSE		9	0.84046793	1.847645	0	0.019516809	0.687	1380	tags=56%, list=3%, signal=57%
GO_REGULATION_OF_NK_T_CELL_PROLIFERATION	GO_REGULATION_OF_NK_T_CELL_PROLIFERATION		5	0.9528622	1.8473843	0	0.019540397	0.689	2132	tags=80%, list=4%, signal=83%
GO_IMMUNE_SYSTEM_DEVELOPMENT	GO_IMMUNE_SYSTEM_DEVELOPMENT		966	0.48251098	1.8450588	0.001795332	0.020060938	0.699	5593	tags=29%, list=10%, signal=32%
GO_CELL_CELL_ADHESION	GO_CELL_CELL_ADHESION		819	0.48150292	1.8446641	0.001675042	0.020084763	0.701	6416	tags=30%, list=12%, signal=33%
GO_NEGATIVE_REGULATION_OF_TUMOR_NECROSIS_FACTOR_SUPERFAMILY_CYTOKINE_PRODUCTION	GO_NEGATIVE_REGULATION_OF_TUMOR_NECROSIS_FACTOR_SUPERFAMILY_CYTOKINE_PRODUCTION		59	0.589094	1.8442005	0	0.020184863	0.704	7624	tags=47%, list=14%, signal=55%
GO_POSITIVE_REGULATION_OF_LYMPHOCYTE_MIGRATION	GO_POSITIVE_REGULATION_OF_LYMPHOCYTE_MIGRATION		36	0.61260635	1.8441087	0.009310987	0.020150697	0.705	5617	tags=39%, list=10%, signal=43%
GO_NEGATIVE_REGULATION_OF_PRODUCTION_OF_MOLECULAR_MEDIATOR_OF_IMMUNE_RESPONSE	GO_NEGATIVE_REGULATION_OF_PRODUCTION_OF_MOLECULAR_MEDIATOR_OF_IMMUNE_RESPONSE		35	0.6457605	1.8438661	0.003472222	0.02017168	0.705	8822	tags=54%, list=16%, signal=65%
GO_NATURAL_KILLER_CELL_ACTIVATION_INVOLVED_IN_IMMUNE_RESPONSE	GO_NATURAL_KILLER_CELL_ACTIVATION_INVOLVED_IN_IMMUNE_RESPONSE		32	0.5898299	1.8430575	0.009451796	0.020324469	0.707	10233	tags=38%, list=19%, signal=46%
GO_REGULATION_OF_RESPONSE_TO_TUMOR_CELL	GO_REGULATION_OF_RESPONSE_TO_TUMOR_CELL		15	0.78335184	1.8430309	0.001872659	0.02027366	0.707	2089	tags=60%, list=4%, signal=62%
GO_POSITIVE_REGULATION_OF_JNK_CASCADE	GO_POSITIVE_REGULATION_OF_JNK_CASCADE		138	0.49875426	1.8423847	0.001814882	0.020369545	0.711	9187	tags=36%, list=17%, signal=42%
GO_HOMEOSTASIS_OF_NUMBER_OF_CELLS	GO_HOMEOSTASIS_OF_NUMBER_OF_CELLS		247	0.5094507	1.8416384	0	0.0205469	0.715	8497	tags=37%, list=15%, signal=43%
GO_NEUTROPHIL_EXTRAVASATION	GO_NEUTROPHIL_EXTRAVASATION		10	0.8560351	1.8401405	0	0.020855684	0.72	1550	tags=50%, list=3%, signal=51%
GO_REGULATION_OF_NEUROINFLAMMATORY_RESPONSE	GO_REGULATION_OF_NEUROINFLAMMATORY_RESPONSE		38	0.6122807	1.8388841	0.003773585	0.021156235	0.724	4644	tags=37%, list=8%, signal=40%
GO_COMPLEMENT_ACTIVATION_ALTERNATIVE_PATHWAY	GO_COMPLEMENT_ACTIVATION_ALTERNATIVE_PATHWAY		16	0.7374325	1.838087	0	0.021340214	0.726	10894	tags=63%, list=20%, signal=78%
GO_NEGATIVE_REGULATION_OF_LYMPHOCYTE_MIGRATION	GO_NEGATIVE_REGULATION_OF_LYMPHOCYTE_MIGRATION		14	0.7732216	1.8377049	0	0.021386882	0.726	4605	tags=57%, list=8%, signal=62%
GO_TOLL_LIKE_RECEPTOR_4_SIGNALING_PATHWAY	GO_TOLL_LIKE_RECEPTOR_4_SIGNALING_PATHWAY		34	0.6337004	1.8376979	0.005444646	0.02132507	0.726	9746	tags=53%, list=18%, signal=64%
GO_INTERLEUKIN_6_MEDIATED_SIGNALING_PATHWAY	GO_INTERLEUKIN_6_MEDIATED_SIGNALING_PATHWAY		24	0.6945328	1.8367958	0.003883495	0.021558592	0.728	5245	tags=42%, list=10%, signal=46%
GO_OSTEOCLAST_DIFFERENTIATION	GO_OSTEOCLAST_DIFFERENTIATION		94	0.55615175	1.8350798	0.003773585	0.02198837	0.736	4872	tags=32%, list=9%, signal=35%
GO_REGULATION_OF_T_CELL_CHEMOTAXIS	GO_REGULATION_OF_T_CELL_CHEMOTAXIS		16	0.6905556	1.8338519	0.003853565	0.022289293	0.741	5617	tags=50%, list=10%, signal=56%
GO_LYMPHOCYTE_APOPTOTIC_PROCESS	GO_LYMPHOCYTE_APOPTOTIC_PROCESS		70	0.5489265	1.8336375	0.005415163	0.022295794	0.742	6122	tags=39%, list=11%, signal=43%
GO_REGULATION_OF_T_CELL_MEDIATED_IMMUNITY	GO_REGULATION_OF_T_CELL_MEDIATED_IMMUNITY		68	0.6002776	1.8336124	0.005545287	0.022239728	0.742	4696	tags=38%, list=9%, signal=42%
GO_NEGATIVE_REGULATION_OF_REGULATED_SECRETORY_PATHWAY	GO_NEGATIVE_REGULATION_OF_REGULATED_SECRETORY_PATHWAY		24	0.69415104	1.832398	0	0.022552093	0.744	3156	tags=46%, list=6%, signal=49%
GO_REGULATION_OF_T_HELPER_17_CELL_LINEAGE_COMMITMENT	GO_REGULATION_OF_T_HELPER_17_CELL_LINEAGE_COMMITMENT		6	0.9598152	1.8317527	0	0.022686264	0.744	770	tags=67%, list=1%, signal=68%
GO_IMMUNOLOGICAL_MEMORY_FORMATION_PROCESS	GO_IMMUNOLOGICAL_MEMORY_FORMATION_PROCESS		9	0.80424637	1.8303134	0	0.02306943	0.745	5409	tags=44%, list=10%, signal=49%
GO_INTERLEUKIN_1_PRODUCTION	GO_INTERLEUKIN_1_PRODUCTION		94	0.53808445	1.8302828	0.001769912	0.023013344	0.745	9187	tags=45%, list=17%, signal=54%
GO_TOLL_LIKE_RECEPTOR_SIGNALING_PATHWAY	GO_TOLL_LIKE_RECEPTOR_SIGNALING_PATHWAY		141	0.52410334	1.8297652	0.003565062	0.023075387	0.747	5324	tags=35%, list=10%, signal=38%
GO_INTERLEUKIN_2_BIOSYNTHETIC_PROCESS	GO_INTERLEUKIN_2_BIOSYNTHETIC_PROCESS		22	0.7137091	1.8277416	0.007490637	0.023717074	0.751	2386	tags=45%, list=4%, signal=47%
GO_POSITIVE_REGULATION_OF_MEMORY_T_CELL_DIFFERENTIATION	GO_POSITIVE_REGULATION_OF_MEMORY_T_CELL_DIFFERENTIATION		6	0.91963756	1.8265278	0	0.023985337	0.753	770	tags=50%, list=1%, signal=51%
GO_INTERFERON_ALPHA_PRODUCTION	GO_INTERFERON_ALPHA_PRODUCTION		30	0.6752874	1.826159	0.012987013	0.024046864	0.755	10127	tags=57%, list=18%, signal=69%
GO_THYMIC_T_CELL_SELECTION	GO_THYMIC_T_CELL_SELECTION		21	0.7387411	1.8255041	0.003629764	0.024232492	0.758	6216	tags=62%, list=11%, signal=70%
GO_RESPONSE_TO_VIRUS	GO_RESPONSE_TO_VIRUS		321	0.48022994	1.8250604	0.010526316	0.02430017	0.759	10127	tags=42%, list=18%, signal=51%
GO_REGULATION_OF_NATURAL_KILLER_CELL_CHEMOTAXIS	GO_REGULATION_OF_NATURAL_KILLER_CELL_CHEMOTAXIS		9	0.83728385	1.8248948	0.001851852	0.024285253	0.759	2610	tags=56%, list=5%, signal=58%
GO_POSITIVE_REGULATION_OF_GTPASE_ACTIVITY	GO_POSITIVE_REGULATION_OF_GTPASE_ACTIVITY		397	0.49974477	1.8240591	0.001865672	0.024479728	0.76	8608	tags=36%, list=16%, signal=42%
GO_POSITIVE_REGULATION_OF_GLIAL_CELL_MIGRATION	GO_POSITIVE_REGULATION_OF_GLIAL_CELL_MIGRATION		11	0.7701131	1.8236942	0.003649635	0.024549602	0.764	2008	tags=36%, list=4%, signal=38%
GO_POSITIVE_REGULATION_OF_T_CELL_MIGRATION	GO_POSITIVE_REGULATION_OF_T_CELL_MIGRATION		30	0.61977094	1.8235003	0.009191177	0.024544729	0.765	5617	tags=43%, list=10%, signal=48%
GO_CHEMOKINE_PRODUCTION	GO_CHEMOKINE_PRODUCTION		83	0.5376325	1.8234651	0.003642987	0.024482084	0.765	10613	tags=48%, list=19%, signal=60%
GO_REGULATION_OF_T_CELL_APOPTOTIC_PROCESS	GO_REGULATION_OF_T_CELL_APOPTOTIC_PROCESS		35	0.5957678	1.8232373	0.007246377	0.02446411	0.766	5662	tags=43%, list=10%, signal=48%
GO_POSITIVE_REGULATION_OF_INTERLEUKIN_8_PRODUCTION	GO_POSITIVE_REGULATION_OF_INTERLEUKIN_8_PRODUCTION		46	0.5854583	1.8226148	0.003629764	0.024571896	0.767	5324	tags=39%, list=10%, signal=43%
GO_INTERLEUKIN_1_BETA_PRODUCTION	GO_INTERLEUKIN_1_BETA_PRODUCTION		80	0.5472582	1.8221681	0.001782531	0.024647687	0.768	8504	tags=43%, list=15%, signal=50%
GO_BASE_CONVERSION_OR_SUBSTITUTION_EDITING	GO_BASE_CONVERSION_OR_SUBSTITUTION_EDITING		21	0.68868434	1.8213956	0.003577818	0.024837317	0.771	4326	tags=43%, list=8%, signal=46%
GO_INTERLEUKIN_27_MEDIATED_SIGNALING_PATHWAY	GO_INTERLEUKIN_27_MEDIATED_SIGNALING_PATHWAY		11	0.83649	1.8207067	0.003731343	0.024980081	0.773	7194	tags=82%, list=13%, signal=94%
GO_POSITIVE_REGULATION_OF_INTERFERON_BETA_PRODUCTION	GO_POSITIVE_REGULATION_OF_INTERFERON_BETA_PRODUCTION		30	0.6103865	1.8185154	0.011090573	0.025582649	0.78	10127	tags=50%, list=18%, signal=61%
GO_IMMUNOLOGICAL_SYNAPSE_FORMATION	GO_IMMUNOLOGICAL_SYNAPSE_FORMATION		13	0.803201	1.8183197	0.003853565	0.02556914	0.781	7736	tags=69%, list=14%, signal=80%
GO_CELL_ACTIVATION_INVOLVED_IN_IMMUNE_RESPONSE	GO_CELL_ACTIVATION_INVOLVED_IN_IMMUNE_RESPONSE		700	0.47286686	1.8175435	0.007259528	0.025731927	0.781	7313	tags=33%, list=13%, signal=38%
GO_INTERLEUKIN_1_BETA_SECRETION	GO_INTERLEUKIN_1_BETA_SECRETION		49	0.584634	1.8165294	0.001788909	0.026018742	0.788	13870	tags=55%, list=25%, signal=74%
GO_NEGATIVE_REGULATION_OF_B_CELL_PROLIFERATION	GO_NEGATIVE_REGULATION_OF_B_CELL_PROLIFERATION		16	0.79088336	1.8135482	0.007736944	0.026968062	0.791	3085	tags=63%, list=6%, signal=66%
GO_LYSOSOME_LOCALIZATION	GO_LYSOSOME_LOCALIZATION		66	0.539375	1.8120179	0.001855288	0.027465753	0.796	7259	tags=39%, list=13%, signal=45%
GO_REGULATION_OF_RESPONSE_TO_EXTERNAL_STIMULUS	GO_REGULATION_OF_RESPONSE_TO_EXTERNAL_STIMULUS		771	0.4611433	1.8119397	0.001706485	0.027425623	0.796	6225	tags=29%, list=11%, signal=32%
GO_NEGATIVE_REGULATION_OF_OSTEOCLAST_DIFFERENTIATION	GO_NEGATIVE_REGULATION_OF_OSTEOCLAST_DIFFERENTIATION		27	0.66061383	1.8099581	0.001865672	0.028015938	0.801	4255	tags=41%, list=8%, signal=44%
GO_POSITIVE_REGULATION_OF_MYELOID_CELL_DIFFERENTIATION	GO_POSITIVE_REGULATION_OF_MYELOID_CELL_DIFFERENTIATION		90	0.5379997	1.8098826	0.007104796	0.027968323	0.801	10069	tags=38%, list=18%, signal=46%
GO_CHRONIC_INFLAMMATORY_RESPONSE	GO_CHRONIC_INFLAMMATORY_RESPONSE		18	0.70304644	1.808497	0.008818342	0.028384484	0.804	3330	tags=50%, list=6%, signal=53%
GO_REGULATION_OF_MICROGLIAL_CELL_ACTIVATION	GO_REGULATION_OF_MICROGLIAL_CELL_ACTIVATION		23	0.66594523	1.8079545	0.00390625	0.028558895	0.804	4644	tags=43%, list=8%, signal=47%
GO_REGULATION_OF_CELL_CELL_ADHESION_MEDIATED_BY_INTEGRIN	GO_REGULATION_OF_CELL_CELL_ADHESION_MEDIATED_BY_INTEGRIN		11	0.7710731	1.8069072	0.005535055	0.028859971	0.806	2804	tags=55%, list=5%, signal=57%
GO_INTERLEUKIN_21_MEDIATED_SIGNALING_PATHWAY	GO_INTERLEUKIN_21_MEDIATED_SIGNALING_PATHWAY		8	0.9041887	1.8056107	0	0.029245112	0.809	2560	tags=88%, list=5%, signal=92%
GO_HOMEOSTASIS_OF_NUMBER_OF_CELLS_WITHIN_A_TISSUE	GO_HOMEOSTASIS_OF_NUMBER_OF_CELLS_WITHIN_A_TISSUE		31	0.6103346	1.8053132	0.001766785	0.029284423	0.809	12249	tags=58%, list=22%, signal=75%
GO_NEGATIVE_REGULATION_OF_RESPONSE_TO_CYTOKINE_STIMULUS	GO_NEGATIVE_REGULATION_OF_RESPONSE_TO_CYTOKINE_STIMULUS		64	0.50907767	1.8042746	0.003418803	0.029621394	0.81	6889	tags=34%, list=12%, signal=39%
GO_POSITIVE_REGULATION_OF_LEUKOCYTE_MIGRATION	GO_POSITIVE_REGULATION_OF_LEUKOCYTE_MIGRATION		122	0.53123415	1.8029139	0.010830325	0.030007191	0.814	5143	tags=33%, list=9%, signal=36%
GO_MACROPHAGE_ACTIVATION_INVOLVED_IN_IMMUNE_RESPONSE	GO_MACROPHAGE_ACTIVATION_INVOLVED_IN_IMMUNE_RESPONSE		12	0.8053361	1.8020359	0.005928854	0.030234735	0.817	4068	tags=50%, list=7%, signal=54%
GO_POSITIVE_REGULATION_OF_LEUKOCYTE_CHEMOTAXIS	GO_POSITIVE_REGULATION_OF_LEUKOCYTE_CHEMOTAXIS		84	0.54808646	1.8013	0.009124087	0.030427407	0.818	6216	tags=36%, list=11%, signal=40%
GO_MEGAKARYOCYTE_DEVELOPMENT	GO_MEGAKARYOCYTE_DEVELOPMENT		15	0.70627904	1.8006785	0.003921569	0.03057258	0.819	8168	tags=53%, list=15%, signal=63%
GO_REGULATION_OF_TOLL_LIKE_RECEPTOR_4_SIGNALING_PATHWAY	GO_REGULATION_OF_TOLL_LIKE_RECEPTOR_4_SIGNALING_PATHWAY		20	0.686963	1.8006532	0.003703704	0.030499345	0.819	15091	tags=75%, list=27%, signal=103%
GO_T_CELL_TOLERANCE_INDUCTION	GO_T_CELL_TOLERANCE_INDUCTION		12	0.8056918	1.7978846	0.007067138	0.03146139	0.823	5255	tags=67%, list=10%, signal=74%
GO_ACTIVATION_OF_INNATE_IMMUNE_RESPONSE	GO_ACTIVATION_OF_INNATE_IMMUNE_RESPONSE		312	0.4719207	1.7968408	0.005136986	0.031767506	0.826	7307	tags=38%, list=13%, signal=43%
GO_POSITIVE_REGULATION_OF_I_KAPPAB_KINASE_NF_KAPPAB_SIGNALING	GO_POSITIVE_REGULATION_OF_I_KAPPAB_KINASE_NF_KAPPAB_SIGNALING		182	0.48425475	1.7966863	0.005444646	0.031741578	0.827	7148	tags=36%, list=13%, signal=42%
GO_REGULATION_OF_APOPTOTIC_CELL_CLEARANCE	GO_REGULATION_OF_APOPTOTIC_CELL_CLEARANCE		9	0.8522682	1.796339	0	0.03178037	0.829	6692	tags=78%, list=12%, signal=88%
GO_NEGATIVE_REGULATION_OF_T_CELL_MEDIATED_IMMUNITY	GO_NEGATIVE_REGULATION_OF_T_CELL_MEDIATED_IMMUNITY		19	0.6816763	1.795511	0.007181329	0.032026533	0.834	6358	tags=53%, list=12%, signal=59%
GO_CELL_CELL_JUNCTION_MAINTENANCE	GO_CELL_CELL_JUNCTION_MAINTENANCE		11	0.6907678	1.7947195	0.005181347	0.032269176	0.838	4268	tags=27%, list=8%, signal=30%
GO_POSITIVE_REGULATION_OF_INTERFERON_GAMMA_SECRETION	GO_POSITIVE_REGULATION_OF_INTERFERON_GAMMA_SECRETION		8	0.887399	1.7945791	0	0.032240584	0.839	2089	tags=75%, list=4%, signal=78%
GO_EOSINOPHIL_ACTIVATION	GO_EOSINOPHIL_ACTIVATION		7	0.8386134	1.7945311	0	0.03217952	0.839	2733	tags=29%, list=5%, signal=30%
GO_INTERFERON_GAMMA_BIOSYNTHETIC_PROCESS	GO_INTERFERON_GAMMA_BIOSYNTHETIC_PROCESS		17	0.7068355	1.7945193	0.012844036	0.032107666	0.839	4075	tags=53%, list=7%, signal=57%
GO_POSITIVE_REGULATION_OF_NEUTROPHIL_MIGRATION	GO_POSITIVE_REGULATION_OF_NEUTROPHIL_MIGRATION		26	0.666013	1.7943112	0.005454545	0.03210377	0.84	6216	tags=50%, list=11%, signal=56%
GO_PURINERGIC_RECEPTOR_SIGNALING_PATHWAY	GO_PURINERGIC_RECEPTOR_SIGNALING_PATHWAY		31	0.6549494	1.794284	0.008591065	0.032037187	0.84	2321	tags=39%, list=4%, signal=40%
GO_NEGATIVE_REGULATION_OF_LEUKOCYTE_APOPTOTIC_PROCESS	GO_NEGATIVE_REGULATION_OF_LEUKOCYTE_APOPTOTIC_PROCESS		50	0.55921626	1.7941159	0.015384615	0.03201942	0.842	6216	tags=44%, list=11%, signal=50%
GO_MULTI_ORGANISM_CELLULAR_PROCESS	GO_MULTI_ORGANISM_CELLULAR_PROCESS		48	0.5228547	1.7936503	0.003401361	0.032148514	0.842	4969	tags=35%, list=9%, signal=39%
GO_NLRP3_INFLAMMASOME_COMPLEX_ASSEMBLY	GO_NLRP3_INFLAMMASOME_COMPLEX_ASSEMBLY		14	0.6816163	1.7930604	0.005454545	0.0323318	0.846	4255	tags=43%, list=8%, signal=46%
GO_INFLAMMATORY_CELL_APOPTOTIC_PROCESS	GO_INFLAMMATORY_CELL_APOPTOTIC_PROCESS		21	0.6168388	1.7911025	0.007054674	0.03302543	0.849	2593	tags=33%, list=5%, signal=35%
GO_NEGATIVE_REGULATION_OF_MACROPHAGE_ACTIVATION	GO_NEGATIVE_REGULATION_OF_MACROPHAGE_ACTIVATION		15	0.7337215	1.7908994	0.011406845	0.033034466	0.85	4636	tags=53%, list=8%, signal=58%
GO_MYELOID_DENDRITIC_CELL_DIFFERENTIATION	GO_MYELOID_DENDRITIC_CELL_DIFFERENTIATION		17	0.6861794	1.7906597	0.007117438	0.033019148	0.85	3709	tags=41%, list=7%, signal=44%
GO_RESPONSE_TO_TYPE_I_INTERFERON	GO_RESPONSE_TO_TYPE_I_INTERFERON		95	0.58009875	1.7902863	0.027131783	0.033098225	0.85	9929	tags=48%, list=18%, signal=59%
GO_NEGATIVE_REGULATION_OF_INTERLEUKIN_10_PRODUCTION	GO_NEGATIVE_REGULATION_OF_INTERLEUKIN_10_PRODUCTION		18	0.7332123	1.7890797	0.012681159	0.03351456	0.851	5792	tags=61%, list=10%, signal=68%
GO_NEGATIVE_REGULATION_OF_MYELOID_LEUKOCYTE_MEDIATED_IMMUNITY	GO_NEGATIVE_REGULATION_OF_MYELOID_LEUKOCYTE_MEDIATED_IMMUNITY		10	0.84016573	1.7879046	0	0.033965856	0.853	2733	tags=70%, list=5%, signal=74%
GO_PEPTIDYL_TYROSINE_AUTOPHOSPHORYLATION	GO_PEPTIDYL_TYROSINE_AUTOPHOSPHORYLATION		37	0.6202843	1.786852	0.015384615	0.0342371	0.859	2362	tags=35%, list=4%, signal=37%
GO_REGULATION_OF_T_CELL_CYTOKINE_PRODUCTION	GO_REGULATION_OF_T_CELL_CYTOKINE_PRODUCTION		30	0.6415324	1.7864466	0.010752688	0.034284282	0.859	9187	tags=50%, list=17%, signal=60%
GO_CYTOLYSIS	GO_CYTOLYSIS		39	0.6102112	1.7855784	0.00974026	0.034556143	0.862	4922	tags=33%, list=9%, signal=37%
GO_POSITIVE_REGULATION_OF_MAST_CELL_ACTIVATION	GO_POSITIVE_REGULATION_OF_MAST_CELL_ACTIVATION		19	0.636725	1.7852554	0.010810811	0.034630053	0.863	6948	tags=42%, list=13%, signal=48%
GO_INTERLEUKIN_23_MEDIATED_SIGNALING_PATHWAY	GO_INTERLEUKIN_23_MEDIATED_SIGNALING_PATHWAY		9	0.8219671	1.7851613	0	0.03459067	0.863	2194	tags=67%, list=4%, signal=69%
GO_DETECTION_OF_OTHER_ORGANISM	GO_DETECTION_OF_OTHER_ORGANISM		13	0.7463859	1.7849813	0.005484461	0.03456067	0.863	4922	tags=62%, list=9%, signal=68%
GO_POSITIVE_REGULATION_OF_INTERLEUKIN_6_SECRETION	GO_POSITIVE_REGULATION_OF_INTERLEUKIN_6_SECRETION		27	0.61131054	1.7824825	0.007155635	0.035548545	0.869	10505	tags=48%, list=19%, signal=59%
GO_SEROTONIN_TRANSPORT	GO_SEROTONIN_TRANSPORT		15	0.7369713	1.7822523	0.005347594	0.03555831	0.869	2770	tags=40%, list=5%, signal=42%
GO_ACTIVATION_OF_PHOSPHOLIPASE_C_ACTIVITY	GO_ACTIVATION_OF_PHOSPHOLIPASE_C_ACTIVITY		30	0.63305616	1.7818862	0.003623189	0.035638064	0.87	2203	tags=27%, list=4%, signal=28%
GO_NEGATIVE_REGULATION_OF_SMOOTH_MUSCLE_CELL_APOPTOTIC_PROCESS	GO_NEGATIVE_REGULATION_OF_SMOOTH_MUSCLE_CELL_APOPTOTIC_PROCESS		10	0.7261779	1.779911	0	0.036409874	0.875	8873	tags=60%, list=16%, signal=71%
GO_NEGATIVE_REGULATION_OF_HEMOPOIESIS	GO_NEGATIVE_REGULATION_OF_HEMOPOIESIS		151	0.48316115	1.7797543	0	0.03639469	0.875	6973	tags=32%, list=13%, signal=37%
GO_REGULATION_OF_NEUTROPHIL_DEGRANULATION	GO_REGULATION_OF_NEUTROPHIL_DEGRANULATION		8	0.86382955	1.7787912	0.003992016	0.036800534	0.877	4644	tags=75%, list=8%, signal=82%
GO_3_UTR_MEDIATED_MRNA_DESTABILIZATION	GO_3_UTR_MEDIATED_MRNA_DESTABILIZATION		16	0.72464204	1.778632	0.003802281	0.03682034	0.878	6592	tags=63%, list=12%, signal=71%
GO_NEGATIVE_REGULATION_OF_INTERLEUKIN_12_PRODUCTION	GO_NEGATIVE_REGULATION_OF_INTERLEUKIN_12_PRODUCTION		16	0.7666095	1.7785931	0.007462686	0.03675551	0.878	6270	tags=69%, list=11%, signal=78%
GO_NEUTROPHIL_HOMEOSTASIS	GO_NEUTROPHIL_HOMEOSTASIS		16	0.6746432	1.7780784	0.003571429	0.03688336	0.879	5891	tags=50%, list=11%, signal=56%
GO_POSITIVE_REGULATION_OF_NIK_NF_KAPPAB_SIGNALING	GO_POSITIVE_REGULATION_OF_NIK_NF_KAPPAB_SIGNALING		75	0.5213838	1.7770835	0.003616637	0.037177544	0.88	6364	tags=35%, list=12%, signal=39%
GO_POSITIVE_REGULATION_OF_KILLING_OF_CELLS_OF_OTHER_ORGANISM	GO_POSITIVE_REGULATION_OF_KILLING_OF_CELLS_OF_OTHER_ORGANISM		12	0.70537406	1.776266	0.005067567	0.037478823	0.881	6358	tags=67%, list=12%, signal=75%
GO_INTERLEUKIN_8_SECRETION	GO_INTERLEUKIN_8_SECRETION		28	0.6408994	1.7757204	0.014760148	0.03764849	0.881	5848	tags=46%, list=11%, signal=52%
GO_SUPEROXIDE_ANION_GENERATION	GO_SUPEROXIDE_ANION_GENERATION		32	0.59004164	1.7754236	0.001776199	0.03767314	0.881	5012	tags=31%, list=9%, signal=34%
GO_TYPE_I_INTERFERON_BIOSYNTHETIC_PROCESS	GO_TYPE_I_INTERFERON_BIOSYNTHETIC_PROCESS		11	0.7889381	1.7748235	0.007648184	0.037876233	0.884	6771	tags=82%, list=12%, signal=93%
GO_POSITIVE_REGULATION_OF_CYTOSOLIC_CALCIUM_ION_CONCENTRATION_INVOLVED_IN_PHOSPHOLIPASE_C_ACTIVATING_G_PROTEIN_COUPLED_SIGNALING_PATHWAY	GO_POSITIVE_REGULATION_OF_CYTOSOLIC_CALCIUM_ION_CONCENTRATION_INVOLVED_IN_PHOSPHOLIPASE_C_ACTIVATING_G_PROTEIN_COUPLED_SIGNALING_PATHWAY		31	0.6714394	1.7744898	0.011029412	0.03794311	0.884	6658	tags=45%, list=12%, signal=51%
GO_REGULATION_OF_MYD88_INDEPENDENT_TOLL_LIKE_RECEPTOR_SIGNALING_PATHWAY	GO_REGULATION_OF_MYD88_INDEPENDENT_TOLL_LIKE_RECEPTOR_SIGNALING_PATHWAY		8	0.8183188	1.7730625	0.00591716	0.03851401	0.889	4683	tags=75%, list=8%, signal=82%
GO_REGULATION_OF_ANTIGEN_PROCESSING_AND_PRESENTATION	GO_REGULATION_OF_ANTIGEN_PROCESSING_AND_PRESENTATION		18	0.7304246	1.7713411	0.018450184	0.03912544	0.892	6216	tags=61%, list=11%, signal=69%
GO_POSITIVE_REGULATION_OF_PRODUCTION_OF_MOLECULAR_MEDIATOR_OF_IMMUNE_RESPONSE	GO_POSITIVE_REGULATION_OF_PRODUCTION_OF_MOLECULAR_MEDIATOR_OF_IMMUNE_RESPONSE		95	0.5177116	1.7713364	0.005415163	0.039035495	0.892	9187	tags=41%, list=17%, signal=49%
GO_POSITIVE_REGULATION_OF_APOPTOTIC_PROCESS_INVOLVED_IN_MORPHOGENESIS	GO_POSITIVE_REGULATION_OF_APOPTOTIC_PROCESS_INVOLVED_IN_MORPHOGENESIS		5	0.863037	1.7706561	0	0.039310507	0.896	1476	tags=40%, list=3%, signal=41%
GO_POSITIVE_REGULATION_OF_APOPTOTIC_PROCESS_INVOLVED_IN_DEVELOPMENT	GO_POSITIVE_REGULATION_OF_APOPTOTIC_PROCESS_INVOLVED_IN_DEVELOPMENT		5	0.863037	1.7706561	0	0.039220557	0.896	1476	tags=40%, list=3%, signal=41%
GO_POSITIVE_REGULATION_OF_LYMPHOCYTE_CHEMOTAXIS	GO_POSITIVE_REGULATION_OF_LYMPHOCYTE_CHEMOTAXIS		20	0.6519066	1.7701555	0.007984032	0.039338794	0.896	5617	tags=40%, list=10%, signal=45%
GO_NEGATIVE_REGULATION_OF_MAST_CELL_ACTIVATION	GO_NEGATIVE_REGULATION_OF_MAST_CELL_ACTIVATION		12	0.7946292	1.7672395	0.005154639	0.040573545	0.903	5579	tags=75%, list=10%, signal=83%
GO_MONONUCLEAR_CELL_MIGRATION	GO_MONONUCLEAR_CELL_MIGRATION		85	0.5794578	1.7659372	0.012681159	0.041076906	0.904	8808	tags=51%, list=16%, signal=60%
GO_LYMPHOID_PROGENITOR_CELL_DIFFERENTIATION	GO_LYMPHOID_PROGENITOR_CELL_DIFFERENTIATION		20	0.67165524	1.7643949	0.009451796	0.04175788	0.906	6256	tags=45%, list=11%, signal=51%
GO_NEGATIVE_REGULATION_OF_ACTIN_NUCLEATION	GO_NEGATIVE_REGULATION_OF_ACTIN_NUCLEATION		8	0.7487551	1.7632945	0.005736138	0.042235546	0.907	4980	tags=50%, list=9%, signal=55%
GO_REGULATION_OF_TYPE_2_IMMUNE_RESPONSE	GO_REGULATION_OF_TYPE_2_IMMUNE_RESPONSE		30	0.6096093	1.7629472	0.007434944	0.04229508	0.909	8822	tags=53%, list=16%, signal=63%
GO_REGULATION_OF_TISSUE_REMODELING	GO_REGULATION_OF_TISSUE_REMODELING		74	0.5101471	1.7620243	0.003642987	0.042654846	0.91	5147	tags=28%, list=9%, signal=31%
GO_NEGATIVE_REGULATION_OF_CYTOKINE_PRODUCTION_INVOLVED_IN_IMMUNE_RESPONSE	GO_NEGATIVE_REGULATION_OF_CYTOKINE_PRODUCTION_INVOLVED_IN_IMMUNE_RESPONSE		24	0.6603625	1.7608004	0.00877193	0.043103274	0.913	8345	tags=54%, list=15%, signal=64%
GO_POSITIVE_REGULATION_OF_INTERLEUKIN_1_SECRETION	GO_POSITIVE_REGULATION_OF_INTERLEUKIN_1_SECRETION		36	0.5811871	1.7588683	0.005263158	0.04402724	0.917	13870	tags=56%, list=25%, signal=74%
GO_SUPEROXIDE_METABOLIC_PROCESS	GO_SUPEROXIDE_METABOLIC_PROCESS		69	0.52827513	1.7578704	0.00174216	0.044512715	0.919	8566	tags=36%, list=16%, signal=43%
GO_RNA_DESTABILIZATION	GO_RNA_DESTABILIZATION		31	0.66821057	1.7569382	0.011695907	0.044958446	0.921	8084	tags=52%, list=15%, signal=60%
GO_LEUKOTRIENE_SIGNALING_PATHWAY	GO_LEUKOTRIENE_SIGNALING_PATHWAY		5	0.9678337	1.7565023	0	0.045091387	0.922	1779	tags=100%, list=3%, signal=103%
GO_NEGATIVE_REGULATION_OF_INTERLEUKIN_6_SECRETION	GO_NEGATIVE_REGULATION_OF_INTERLEUKIN_6_SECRETION		9	0.7869434	1.756499	0.003527337	0.044992894	0.922	5848	tags=78%, list=11%, signal=87%
GO_NEGATIVE_REGULATION_OF_B_CELL_RECEPTOR_SIGNALING_PATHWAY	GO_NEGATIVE_REGULATION_OF_B_CELL_RECEPTOR_SIGNALING_PATHWAY		8	0.9070838	1.7556318	0	0.04533314	0.922	4496	tags=88%, list=8%, signal=95%
GO_NEGATIVE_REGULATION_OF_TYPE_2_IMMUNE_RESPONSE	GO_NEGATIVE_REGULATION_OF_TYPE_2_IMMUNE_RESPONSE		14	0.66914356	1.755068	0.003565062	0.04554654	0.922	8064	tags=57%, list=15%, signal=67%
GO_T_CELL_MEDIATED_CYTOTOXICITY	GO_T_CELL_MEDIATED_CYTOTOXICITY		49	0.59096074	1.7544874	0.02226345	0.04576144	0.923	4696	tags=39%, list=9%, signal=42%
GO_SEBACEOUS_GLAND_DEVELOPMENT	GO_SEBACEOUS_GLAND_DEVELOPMENT		8	0.82684207	1.7539291	0	0.045976028	0.923	4895	tags=75%, list=9%, signal=82%
GO_REGULATION_OF_MAST_CELL_ACTIVATION_INVOLVED_IN_IMMUNE_RESPONSE	GO_REGULATION_OF_MAST_CELL_ACTIVATION_INVOLVED_IN_IMMUNE_RESPONSE		30	0.5879684	1.7530588	0.016129032	0.046350658	0.923	7259	tags=43%, list=13%, signal=50%
GO_TUMOR_NECROSIS_FACTOR_BIOSYNTHETIC_PROCESS	GO_TUMOR_NECROSIS_FACTOR_BIOSYNTHETIC_PROCESS		23	0.69634825	1.7526499	0.005576208	0.046467666	0.924	6122	tags=57%, list=11%, signal=64%
GO_REGULATION_OF_NATURAL_KILLER_CELL_ACTIVATION	GO_REGULATION_OF_NATURAL_KILLER_CELL_ACTIVATION		33	0.57980746	1.7520005	0.007380074	0.046715055	0.924	4922	tags=39%, list=9%, signal=43%
GO_POSITIVE_REGULATION_OF_RESPONSE_TO_TUMOR_CELL	GO_POSITIVE_REGULATION_OF_RESPONSE_TO_TUMOR_CELL		12	0.7596373	1.7519022	0.012727273	0.046671603	0.924	2089	tags=58%, list=4%, signal=61%
GO_REGULATION_OF_RHO_PROTEIN_SIGNAL_TRANSDUCTION	GO_REGULATION_OF_RHO_PROTEIN_SIGNAL_TRANSDUCTION		138	0.542644	1.7504469	0.011214953	0.047378477	0.928	5199	tags=31%, list=9%, signal=34%
GO_POSITIVE_REGULATION_OF_NF_KAPPAB_TRANSCRIPTION_FACTOR_ACTIVITY	GO_POSITIVE_REGULATION_OF_NF_KAPPAB_TRANSCRIPTION_FACTOR_ACTIVITY		150	0.48470628	1.7496387	0.008802817	0.047694713	0.928	7360	tags=37%, list=13%, signal=42%
GO_NEGATIVE_REGULATION_OF_INTERFERON_BETA_PRODUCTION	GO_NEGATIVE_REGULATION_OF_INTERFERON_BETA_PRODUCTION		14	0.6426335	1.7488747	0.007407407	0.048008732	0.929	11130	tags=71%, list=20%, signal=89%
GO_CYTOKINE_PRODUCTION_INVOLVED_IN_IMMUNE_RESPONSE	GO_CYTOKINE_PRODUCTION_INVOLVED_IN_IMMUNE_RESPONSE		99	0.52715534	1.7475905	0.014010508	0.04862909	0.93	7650	tags=39%, list=14%, signal=46%
GO_REGULATION_OF_GTPASE_ACTIVITY	GO_REGULATION_OF_GTPASE_ACTIVITY		468	0.4722108	1.74742	0.014652015	0.04861758	0.93	5409	tags=28%, list=10%, signal=31%
GO_NEGATIVE_REGULATION_OF_INTERLEUKIN_17_PRODUCTION	GO_NEGATIVE_REGULATION_OF_INTERLEUKIN_17_PRODUCTION		14	0.71212393	1.746897	0.00754717	0.048810888	0.93	4255	tags=43%, list=8%, signal=46%
GO_REGULATION_OF_DENDRITIC_SPINE_MAINTENANCE	GO_REGULATION_OF_DENDRITIC_SPINE_MAINTENANCE		12	0.6700278	1.7459172	0.006	0.049245216	0.933	1131	tags=33%, list=2%, signal=34%
GO_RESPONSE_TO_INTERLEUKIN_9	GO_RESPONSE_TO_INTERLEUKIN_9		10	0.7861809	1.7456304	0.001834862	0.049320895	0.934	7378	tags=80%, list=13%, signal=92%
GO_NEGATIVE_REGULATION_OF_DENDRITIC_CELL_DIFFERENTIATION	GO_NEGATIVE_REGULATION_OF_DENDRITIC_CELL_DIFFERENTIATION		6	0.94665277	1.7455809	0	0.04924758	0.934	1984	tags=83%, list=4%, signal=86%
GO_POSITIVE_REGULATION_OF_MYELOID_LEUKOCYTE_DIFFERENTIATION	GO_POSITIVE_REGULATION_OF_MYELOID_LEUKOCYTE_DIFFERENTIATION		53	0.5596058	1.745239	0.01754386	0.049331818	0.934	10069	tags=43%, list=18%, signal=53%
GO_POSITIVE_REGULATION_OF_PHAGOCYTOSIS	GO_POSITIVE_REGULATION_OF_PHAGOCYTOSIS		64	0.55818564	1.7421178	0.019130435	0.050992176	0.939	6692	tags=38%, list=12%, signal=43%
GO_REGULATION_OF_MACROPHAGE_ACTIVATION	GO_REGULATION_OF_MACROPHAGE_ACTIVATION		59	0.55233073	1.7416235	0.017110266	0.051128834	0.939	9029	tags=47%, list=16%, signal=57%
GO_NEGATIVE_REGULATION_OF_PEPTIDE_SECRETION	GO_NEGATIVE_REGULATION_OF_PEPTIDE_SECRETION		134	0.4690974	1.7416173	0.001650165	0.051021803	0.939	4636	tags=30%, list=8%, signal=33%
GO_REGULATION_OF_NEUTROPHIL_MIGRATION	GO_REGULATION_OF_NEUTROPHIL_MIGRATION		32	0.6477358	1.7414392	0.009242144	0.05102015	0.94	6216	tags=47%, list=11%, signal=53%
GO_REGULATION_OF_NATURAL_KILLER_CELL_DIFFERENTIATION	GO_REGULATION_OF_NATURAL_KILLER_CELL_DIFFERENTIATION		14	0.6914476	1.7413123	0.005524862	0.050987005	0.94	4922	tags=50%, list=9%, signal=55%
GO_GROWTH_INVOLVED_IN_SYMBIOTIC_INTERACTION	GO_GROWTH_INVOLVED_IN_SYMBIOTIC_INTERACTION		18	0.6677113	1.7409495	0.007104796	0.051082216	0.941	8345	tags=50%, list=15%, signal=59%
GO_NITRIC_OXIDE_SYNTHASE_BIOSYNTHETIC_PROCESS	GO_NITRIC_OXIDE_SYNTHASE_BIOSYNTHETIC_PROCESS		17	0.66534555	1.7403871	0.014814815	0.051311743	0.943	10019	tags=71%, list=18%, signal=86%
GO_MYELOID_LEUKOCYTE_ACTIVATION	GO_MYELOID_LEUKOCYTE_ACTIVATION		643	0.46031204	1.7385038	0.011173184	0.05228062	0.943	6204	tags=30%, list=11%, signal=34%
GO_POSITIVE_REGULATION_OF_PEPTIDYL_TYROSINE_PHOSPHORYLATION	GO_POSITIVE_REGULATION_OF_PEPTIDYL_TYROSINE_PHOSPHORYLATION		184	0.479566	1.738249	0.003546099	0.0523082	0.943	6544	tags=29%, list=12%, signal=33%
GO_REGULATION_OF_SMALL_GTPASE_MEDIATED_SIGNAL_TRANSDUCTION	GO_REGULATION_OF_SMALL_GTPASE_MEDIATED_SIGNAL_TRANSDUCTION		331	0.5060482	1.7378149	0.016666668	0.052450914	0.946	5593	tags=30%, list=10%, signal=33%
GO_T_CELL_APOPTOTIC_PROCESS	GO_T_CELL_APOPTOTIC_PROCESS		48	0.54350346	1.7376388	0.01438849	0.052438505	0.946	5662	tags=40%, list=10%, signal=44%
GO_POSITIVE_REGULATION_OF_INTERLEUKIN_4_PRODUCTION	GO_POSITIVE_REGULATION_OF_INTERLEUKIN_4_PRODUCTION		23	0.69001997	1.737264	0.032015067	0.052516412	0.946	3764	tags=52%, list=7%, signal=56%
GO_NEGATIVE_REGULATION_OF_TUMOR_NECROSIS_FACTOR_SECRETION	GO_NEGATIVE_REGULATION_OF_TUMOR_NECROSIS_FACTOR_SECRETION		8	0.7796039	1.7371695	0.005128205	0.0524645	0.946	3794	tags=63%, list=7%, signal=67%
GO_NATURAL_KILLER_CELL_MEDIATED_IMMUNE_RESPONSE_TO_TUMOR_CELL	GO_NATURAL_KILLER_CELL_MEDIATED_IMMUNE_RESPONSE_TO_TUMOR_CELL		11	0.8195496	1.7370784	0.005576208	0.052430585	0.946	2089	tags=73%, list=4%, signal=76%
GO_POSITIVE_REGULATION_OF_NITRIC_OXIDE_SYNTHASE_BIOSYNTHETIC_PROCESS	GO_POSITIVE_REGULATION_OF_NITRIC_OXIDE_SYNTHASE_BIOSYNTHETIC_PROCESS		13	0.7436689	1.7368114	0.011009174	0.052493393	0.946	4255	tags=62%, list=8%, signal=67%
GO_REGULATION_OF_DEFENSE_RESPONSE_TO_BACTERIUM	GO_REGULATION_OF_DEFENSE_RESPONSE_TO_BACTERIUM		18	0.6447907	1.7362912	0.005660377	0.05266204	0.947	6125	tags=39%, list=11%, signal=44%
GO_REGULATION_OF_NIK_NF_KAPPAB_SIGNALING	GO_REGULATION_OF_NIK_NF_KAPPAB_SIGNALING		106	0.4946732	1.7361622	0.001745201	0.052608714	0.947	4530	tags=30%, list=8%, signal=33%
GO_MACROPHAGE_MIGRATION	GO_MACROPHAGE_MIGRATION		47	0.56460893	1.7352371	0.014440433	0.05308988	0.949	4605	tags=34%, list=8%, signal=37%
GO_NEGATIVE_REGULATION_OF_LYMPHOCYTE_APOPTOTIC_PROCESS	GO_NEGATIVE_REGULATION_OF_LYMPHOCYTE_APOPTOTIC_PROCESS		32	0.5521385	1.7350149	0.010416667	0.053112146	0.949	1483	tags=31%, list=3%, signal=32%
GO_NEGATIVE_REGULATION_OF_MUSCLE_CELL_APOPTOTIC_PROCESS	GO_NEGATIVE_REGULATION_OF_MUSCLE_CELL_APOPTOTIC_PROCESS		44	0.51617676	1.7349567	0.005474452	0.05304381	0.949	6270	tags=34%, list=11%, signal=38%
GO_SMALL_GTPASE_MEDIATED_SIGNAL_TRANSDUCTION	GO_SMALL_GTPASE_MEDIATED_SIGNAL_TRANSDUCTION		555	0.4745859	1.7334576	0.013207547	0.05375417	0.954	5781	tags=27%, list=10%, signal=30%
GO_CALCIUM_MEDIATED_SIGNALING	GO_CALCIUM_MEDIATED_SIGNALING		217	0.49611706	1.7331164	0.013913044	0.053824577	0.955	6289	tags=29%, list=11%, signal=33%
GO_REGULATION_OF_VIRAL_GENOME_REPLICATION	GO_REGULATION_OF_VIRAL_GENOME_REPLICATION		95	0.52239734	1.7331071	0.012411348	0.053719312	0.955	7120	tags=42%, list=13%, signal=48%
GO_ACTIN_CORTICAL_PATCH_LOCALIZATION	GO_ACTIN_CORTICAL_PATCH_LOCALIZATION		7	0.8254835	1.7321973	0.003831418	0.054164704	0.956	2580	tags=43%, list=5%, signal=45%
GO_POSITIVE_REGULATION_OF_T_CELL_TOLERANCE_INDUCTION	GO_POSITIVE_REGULATION_OF_T_CELL_TOLERANCE_INDUCTION		7	0.86362004	1.7318164	0.003795066	0.054333016	0.956	1483	tags=57%, list=3%, signal=59%
GO_NEGATIVE_REGULATION_OF_LEUKOCYTE_MIGRATION	GO_NEGATIVE_REGULATION_OF_LEUKOCYTE_MIGRATION		44	0.5877197	1.7311726	0.010830325	0.05456185	0.957	8822	tags=50%, list=16%, signal=59%
GO_POSITIVE_REGULATION_OF_OSTEOCLAST_DIFFERENTIATION	GO_POSITIVE_REGULATION_OF_OSTEOCLAST_DIFFERENTIATION		25	0.62248504	1.7301849	0.016483517	0.055006463	0.958	3757	tags=36%, list=7%, signal=39%
GO_REGULATION_OF_GROWTH_RATE	GO_REGULATION_OF_GROWTH_RATE		7	0.80230635	1.7296877	0.003731343	0.055162746	0.959	4062	tags=57%, list=7%, signal=62%
GO_POSITIVE_REGULATION_OF_TOLL_LIKE_RECEPTOR_SIGNALING_PATHWAY	GO_POSITIVE_REGULATION_OF_TOLL_LIKE_RECEPTOR_SIGNALING_PATHWAY		23	0.60985136	1.7288486	0.005628518	0.05557533	0.96	4683	tags=48%, list=8%, signal=52%
GO_NEGATIVE_REGULATION_OF_CYTOKINE_BIOSYNTHETIC_PROCESS	GO_NEGATIVE_REGULATION_OF_CYTOKINE_BIOSYNTHETIC_PROCESS		30	0.5835897	1.7279496	0.003636364	0.05596696	0.96	6374	tags=47%, list=12%, signal=53%
GO_POSITIVE_REGULATION_OF_T_CELL_MEDIATED_IMMUNITY	GO_POSITIVE_REGULATION_OF_T_CELL_MEDIATED_IMMUNITY		46	0.57366794	1.7277329	0.021818181	0.05601223	0.961	4130	tags=35%, list=7%, signal=38%
GO_REGULATION_OF_MYELOID_LEUKOCYTE_DIFFERENTIATION	GO_REGULATION_OF_MYELOID_LEUKOCYTE_DIFFERENTIATION		116	0.5042955	1.7266672	0.01084991	0.05653376	0.961	4255	tags=28%, list=8%, signal=30%
GO_TAXIS	GO_TAXIS		628	0.46407995	1.7263702	0.008695652	0.056601457	0.961	8797	tags=36%, list=16%, signal=42%
GO_REGULATION_OF_INTERLEUKIN_12_SECRETION	GO_REGULATION_OF_INTERLEUKIN_12_SECRETION		7	0.8403608	1.7261169	0.005736138	0.056649808	0.961	1591	tags=57%, list=3%, signal=59%
GO_INOSITOL_PHOSPHATE_BIOSYNTHETIC_PROCESS	GO_INOSITOL_PHOSPHATE_BIOSYNTHETIC_PROCESS		42	0.5167491	1.726073	0.008695652	0.05657728	0.961	12325	tags=43%, list=22%, signal=55%
GO_INTERLEUKIN_1_SECRETION	GO_INTERLEUKIN_1_SECRETION		57	0.54030937	1.725824	0.008976661	0.056657225	0.961	13870	tags=54%, list=25%, signal=73%
GO_POSITIVE_REGULATION_OF_FLAGELLATED_SPERM_MOTILITY	GO_POSITIVE_REGULATION_OF_FLAGELLATED_SPERM_MOTILITY		11	0.6664203	1.725153	0.010204081	0.056964763	0.962	1282	tags=27%, list=2%, signal=28%
GO_EOSINOPHIL_MIGRATION	GO_EOSINOPHIL_MIGRATION		24	0.6737362	1.725101	0.012259195	0.056890067	0.962	3764	tags=50%, list=7%, signal=54%
GO_POSITIVE_REGULATION_OF_INTERLEUKIN_8_SECRETION	GO_POSITIVE_REGULATION_OF_INTERLEUKIN_8_SECRETION		15	0.68924725	1.7247939	0.025408348	0.056989785	0.963	5182	tags=47%, list=9%, signal=51%
GO_REGULATION_OF_PHAGOCYTOSIS	GO_REGULATION_OF_PHAGOCYTOSIS		87	0.53677	1.7246543	0.015929203	0.056952707	0.963	4301	tags=32%, list=8%, signal=35%
GO_REGULATION_OF_LEUKOCYTE_TETHERING_OR_ROLLING	GO_REGULATION_OF_LEUKOCYTE_TETHERING_OR_ROLLING		8	0.8390905	1.7242414	0.005769231	0.05707708	0.964	8158	tags=88%, list=15%, signal=103%
GO_INTERMEDIATE_FILAMENT_BASED_PROCESS	GO_INTERMEDIATE_FILAMENT_BASED_PROCESS		48	0.54954326	1.7241247	0.005338078	0.05702603	0.964	6337	tags=38%, list=11%, signal=42%
GO_POSITIVE_REGULATION_OF_MONOCYTE_DIFFERENTIATION	GO_POSITIVE_REGULATION_OF_MONOCYTE_DIFFERENTIATION		10	0.7497126	1.7240648	0.013333334	0.056937076	0.964	11233	tags=60%, list=20%, signal=75%
GO_T_CELL_ACTIVATION_VIA_T_CELL_RECEPTOR_CONTACT_WITH_ANTIGEN_BOUND_TO_MHC_MOLECULE_ON_ANTIGEN_PRESENTING_CELL	GO_T_CELL_ACTIVATION_VIA_T_CELL_RECEPTOR_CONTACT_WITH_ANTIGEN_BOUND_TO_MHC_MOLECULE_ON_ANTIGEN_PRESENTING_CELL		8	0.9273684	1.7239537	0.005747126	0.056885738	0.964	1591	tags=75%, list=3%, signal=77%
GO_EPIDERMAL_CELL_DIFFERENTIATION	GO_EPIDERMAL_CELL_DIFFERENTIATION		352	0.47897917	1.7231245	0.012131716	0.057260465	0.965	11451	tags=41%, list=21%, signal=52%
GO_INOSITOL_LIPID_MEDIATED_SIGNALING	GO_INOSITOL_LIPID_MEDIATED_SIGNALING		181	0.48662767	1.7226259	0.008960574	0.05742812	0.965	8497	tags=34%, list=15%, signal=40%
GO_POSITIVE_REGULATION_OF_ERYTHROCYTE_DIFFERENTIATION	GO_POSITIVE_REGULATION_OF_ERYTHROCYTE_DIFFERENTIATION		31	0.5715616	1.7223285	0.001926782	0.057509057	0.965	3616	tags=26%, list=7%, signal=28%
GO_DENDRITIC_CELL_CYTOKINE_PRODUCTION	GO_DENDRITIC_CELL_CYTOKINE_PRODUCTION		12	0.69442487	1.722153	0.011538462	0.057488974	0.965	7014	tags=67%, list=13%, signal=76%
GO_REGULATION_OF_INTERLEUKIN_4_PRODUCTION	GO_REGULATION_OF_INTERLEUKIN_4_PRODUCTION		28	0.64891714	1.7212037	0.024029575	0.05799063	0.966	3764	tags=46%, list=7%, signal=50%
GO_POSITIVE_REGULATION_OF_INTERFERON_ALPHA_PRODUCTION	GO_POSITIVE_REGULATION_OF_INTERFERON_ALPHA_PRODUCTION		22	0.6434298	1.7205487	0.025830258	0.058286037	0.967	10127	tags=55%, list=18%, signal=67%
GO_B_CELL_ACTIVATION_INVOLVED_IN_IMMUNE_RESPONSE	GO_B_CELL_ACTIVATION_INVOLVED_IN_IMMUNE_RESPONSE		73	0.57089984	1.7205003	0.01590106	0.05821084	0.967	6544	tags=38%, list=12%, signal=43%
GO_MONOCYTE_CHEMOTAXIS	GO_MONOCYTE_CHEMOTAXIS		63	0.58446956	1.7202246	0.015789473	0.05828244	0.968	8158	tags=51%, list=15%, signal=60%
GO_REGULATION_OF_GAMMA_DELTA_T_CELL_ACTIVATION	GO_REGULATION_OF_GAMMA_DELTA_T_CELL_ACTIVATION		8	0.8874431	1.7201029	0	0.05824154	0.968	2977	tags=75%, list=5%, signal=79%
GO_POSITIVE_REGULATION_OF_CELL_CELL_ADHESION_MEDIATED_BY_INTEGRIN	GO_POSITIVE_REGULATION_OF_CELL_CELL_ADHESION_MEDIATED_BY_INTEGRIN		6	0.88109344	1.7181907	0.007285975	0.05930091	0.969	2804	tags=67%, list=5%, signal=70%
GO_REGULATION_OF_HAIR_CYCLE	GO_REGULATION_OF_HAIR_CYCLE		27	0.554822	1.7179644	0.005291005	0.05931535	0.969	8345	tags=41%, list=15%, signal=48%
GO_INTERLEUKIN_12_BIOSYNTHETIC_PROCESS	GO_INTERLEUKIN_12_BIOSYNTHETIC_PROCESS		7	0.83714134	1.7179326	0	0.059230745	0.969	5140	tags=57%, list=9%, signal=63%
GO_ESTABLISHMENT_OF_LYMPHOCYTE_POLARITY	GO_ESTABLISHMENT_OF_LYMPHOCYTE_POLARITY		11	0.7954708	1.7175325	0.016393442	0.059347857	0.969	6216	tags=55%, list=11%, signal=61%
GO_POSITIVE_REGULATION_OF_TYPE_I_INTERFERON_PRODUCTION	GO_POSITIVE_REGULATION_OF_TYPE_I_INTERFERON_PRODUCTION		77	0.517186	1.7175245	0.011090573	0.059241593	0.969	7874	tags=38%, list=14%, signal=44%
GO_REGULATION_OF_REACTIVE_OXYGEN_SPECIES_BIOSYNTHETIC_PROCESS	GO_REGULATION_OF_REACTIVE_OXYGEN_SPECIES_BIOSYNTHETIC_PROCESS		92	0.48110628	1.7175102	0	0.059134312	0.969	8601	tags=39%, list=16%, signal=46%
GO_DEFENSE_RESPONSE_TO_GRAM_POSITIVE_BACTERIUM	GO_DEFENSE_RESPONSE_TO_GRAM_POSITIVE_BACTERIUM		95	0.49549085	1.7154435	0.001703578	0.060213752	0.969	8747	tags=36%, list=16%, signal=42%
GO_POSITIVE_REGULATION_OF_CHEMOKINE_PRODUCTION	GO_POSITIVE_REGULATION_OF_CHEMOKINE_PRODUCTION		53	0.5525919	1.7149023	0.016483517	0.060429376	0.969	8822	tags=43%, list=16%, signal=52%
GO_POSITIVE_REGULATION_OF_SMALL_GTPASE_MEDIATED_SIGNAL_TRANSDUCTION	GO_POSITIVE_REGULATION_OF_SMALL_GTPASE_MEDIATED_SIGNAL_TRANSDUCTION		69	0.5727311	1.7148232	0.024074074	0.060350515	0.969	5593	tags=36%, list=10%, signal=40%
GO_POSITIVE_REGULATION_OF_STRESS_ACTIVATED_PROTEIN_KINASE_SIGNALING_CASCADE	GO_POSITIVE_REGULATION_OF_STRESS_ACTIVATED_PROTEIN_KINASE_SIGNALING_CASCADE		170	0.4590764	1.7144508	0.009124087	0.06044727	0.969	9187	tags=34%, list=17%, signal=40%
GO_RESPONSE_TO_INTERLEUKIN_13	GO_RESPONSE_TO_INTERLEUKIN_13		5	0.86382717	1.7139416	0.005535055	0.060649905	0.969	4059	tags=60%, list=7%, signal=65%
GO_REGULATION_OF_PHOSPHATIDYLINOSITOL_3_KINASE_SIGNALING	GO_REGULATION_OF_PHOSPHATIDYLINOSITOL_3_KINASE_SIGNALING		121	0.5018569	1.713707	0.01607143	0.060664594	0.969	8396	tags=36%, list=15%, signal=43%
GO_REGULATION_OF_NEUTROPHIL_MEDIATED_CYTOTOXICITY	GO_REGULATION_OF_NEUTROPHIL_MEDIATED_CYTOTOXICITY		5	0.82234186	1.7135082	0.005244755	0.06067558	0.969	6915	tags=40%, list=13%, signal=46%
GO_REACTIVE_OXYGEN_SPECIES_BIOSYNTHETIC_PROCESS	GO_REACTIVE_OXYGEN_SPECIES_BIOSYNTHETIC_PROCESS		112	0.47523	1.7123772	0	0.061345153	0.972	8601	tags=40%, list=16%, signal=47%
GO_NEURON_REMODELING	GO_NEURON_REMODELING		13	0.66580224	1.7123576	0.011173184	0.061246622	0.972	6918	tags=69%, list=13%, signal=79%
GO_POSITIVE_REGULATION_OF_INTERFERON_GAMMA_BIOSYNTHETIC_PROCESS	GO_POSITIVE_REGULATION_OF_INTERFERON_GAMMA_BIOSYNTHETIC_PROCESS		12	0.7406834	1.7114526	0.010889292	0.061727013	0.972	4075	tags=58%, list=7%, signal=63%
GO_CELL_MOTILITY	GO_CELL_MOTILITY		1674	0.43466824	1.7111259	0.008591065	0.061799265	0.972	6385	tags=27%, list=12%, signal=30%
GO_GAMMA_DELTA_T_CELL_DIFFERENTIATION	GO_GAMMA_DELTA_T_CELL_DIFFERENTIATION		9	0.83931464	1.7107586	0.005639098	0.06192916	0.972	2977	tags=67%, list=5%, signal=70%
GO_POSITIVE_REGULATION_OF_CYTOKINE_PRODUCTION_INVOLVED_IN_IMMUNE_RESPONSE	GO_POSITIVE_REGULATION_OF_CYTOKINE_PRODUCTION_INVOLVED_IN_IMMUNE_RESPONSE		53	0.54463756	1.7105995	0.016574586	0.06191944	0.972	4521	tags=34%, list=8%, signal=37%
GO_NEGATIVE_REGULATION_OF_T_CELL_MEDIATED_CYTOTOXICITY	GO_NEGATIVE_REGULATION_OF_T_CELL_MEDIATED_CYTOTOXICITY		7	0.84742785	1.7104467	0.003724395	0.061903585	0.972	1348	tags=57%, list=2%, signal=59%
GO_REGULATION_OF_RAS_PROTEIN_SIGNAL_TRANSDUCTION	GO_REGULATION_OF_RAS_PROTEIN_SIGNAL_TRANSDUCTION		233	0.51169646	1.7100494	0.020599252	0.062043224	0.972	7663	tags=34%, list=14%, signal=40%
GO_MYELOID_CELL_DEVELOPMENT	GO_MYELOID_CELL_DEVELOPMENT		67	0.50521964	1.7084489	0.011049724	0.06299102	0.972	6532	tags=36%, list=12%, signal=41%
GO_PHOSPHATIDYLINOSITOL_3_KINASE_SIGNALING	GO_PHOSPHATIDYLINOSITOL_3_KINASE_SIGNALING		145	0.49570885	1.7068886	0.014519056	0.063970305	0.975	8497	tags=35%, list=15%, signal=41%
GO_REGULATION_OF_ERYTHROCYTE_DIFFERENTIATION	GO_REGULATION_OF_ERYTHROCYTE_DIFFERENTIATION		47	0.5343624	1.7067525	0.015122874	0.063946724	0.975	7554	tags=32%, list=14%, signal=37%
GO_REGULATION_OF_LEUKOCYTE_ADHESION_TO_VASCULAR_ENDOTHELIAL_CELL	GO_REGULATION_OF_LEUKOCYTE_ADHESION_TO_VASCULAR_ENDOTHELIAL_CELL		22	0.6377964	1.7062043	0.009541985	0.06415958	0.975	10108	tags=50%, list=18%, signal=61%
GO_REGULATION_OF_IMMUNOGLOBULIN_PRODUCTION	GO_REGULATION_OF_IMMUNOGLOBULIN_PRODUCTION		65	0.56264204	1.7061211	0.010791367	0.0640996	0.975	9048	tags=43%, list=16%, signal=51%
GO_CELLULAR_RESPONSE_TO_MECHANICAL_STIMULUS	GO_CELLULAR_RESPONSE_TO_MECHANICAL_STIMULUS		76	0.49648413	1.7052306	0.01459854	0.064583346	0.977	5140	tags=28%, list=9%, signal=30%
GO_REGULATION_OF_B_CELL_MEDIATED_IMMUNITY	GO_REGULATION_OF_B_CELL_MEDIATED_IMMUNITY		53	0.5906531	1.705225	0.00915751	0.06447111	0.977	9048	tags=47%, list=16%, signal=56%
GO_LEUKOCYTE_AGGREGATION	GO_LEUKOCYTE_AGGREGATION		12	0.71010923	1.7044727	0.018656716	0.064865686	0.978	5143	tags=50%, list=9%, signal=55%
GO_RESPONSE_TO_FUNGUS	GO_RESPONSE_TO_FUNGUS		49	0.52205765	1.7044544	0.003466205	0.06476123	0.978	4524	tags=29%, list=8%, signal=31%
GO_PLATELET_MORPHOGENESIS	GO_PLATELET_MORPHOGENESIS		21	0.562218	1.7037433	0.007518797	0.06518271	0.978	2650	tags=24%, list=5%, signal=25%
GO_GERMINAL_CENTER_FORMATION	GO_GERMINAL_CENTER_FORMATION		15	0.6737298	1.7035894	0.014678899	0.0651535	0.978	4284	tags=47%, list=8%, signal=51%
GO_MODULATION_OF_GROWTH_OF_SYMBIONT_INVOLVED_IN_INTERACTION_WITH_HOST	GO_MODULATION_OF_GROWTH_OF_SYMBIONT_INVOLVED_IN_INTERACTION_WITH_HOST		15	0.69270843	1.7026415	0.014440433	0.065694116	0.98	8345	tags=53%, list=15%, signal=63%
GO_LIPOXYGENASE_PATHWAY	GO_LIPOXYGENASE_PATHWAY		16	0.6611498	1.702347	0.012681159	0.06577045	0.98	5012	tags=38%, list=9%, signal=41%
GO_NEGATIVE_REGULATION_OF_MYELOID_CELL_APOPTOTIC_PROCESS	GO_NEGATIVE_REGULATION_OF_MYELOID_CELL_APOPTOTIC_PROCESS		15	0.6294293	1.7005816	0.019298246	0.06682438	0.98	5593	tags=53%, list=10%, signal=59%
GO_RESPONSE_TO_AUDITORY_STIMULUS	GO_RESPONSE_TO_AUDITORY_STIMULUS		23	0.589996	1.6997855	0.007092198	0.067283265	0.98	4003	tags=26%, list=7%, signal=28%
GO_ANTIGEN_PROCESSING_AND_PRESENTATION_OF_PEPTIDE_OR_POLYSACCHARIDE_ANTIGEN_VIA_MHC_CLASS_II	GO_ANTIGEN_PROCESSING_AND_PRESENTATION_OF_PEPTIDE_OR_POLYSACCHARIDE_ANTIGEN_VIA_MHC_CLASS_II		99	0.4829526	1.6987728	0.014869888	0.06790175	0.98	3217	tags=23%, list=6%, signal=25%
GO_POSITIVE_REGULATION_OF_ERK1_AND_ERK2_CASCADE	GO_POSITIVE_REGULATION_OF_ERK1_AND_ERK2_CASCADE		206	0.48211148	1.6986828	0.010434783	0.067843184	0.98	8434	tags=39%, list=15%, signal=46%
GO_REGULATION_OF_T_HELPER_1_CELL_DIFFERENTIATION	GO_REGULATION_OF_T_HELPER_1_CELL_DIFFERENTIATION		10	0.758715	1.6973214	0.00915751	0.068635814	0.98	8064	tags=70%, list=15%, signal=82%
GO_TOLL_LIKE_RECEPTOR_3_SIGNALING_PATHWAY	GO_TOLL_LIKE_RECEPTOR_3_SIGNALING_PATHWAY		19	0.6338611	1.6973023	0.022132797	0.068529	0.98	5324	tags=53%, list=10%, signal=58%
GO_NEGATIVE_REGULATION_OF_INTERLEUKIN_2_PRODUCTION	GO_NEGATIVE_REGULATION_OF_INTERLEUKIN_2_PRODUCTION		23	0.60651666	1.6972034	0.01980198	0.06845877	0.98	3794	tags=35%, list=7%, signal=37%
GO_FUCOSE_CATABOLIC_PROCESS	GO_FUCOSE_CATABOLIC_PROCESS		9	0.7214344	1.696969	0.007233273	0.06851006	0.98	7848	tags=33%, list=14%, signal=39%
GO_REGULATION_OF_T_CELL_MEDIATED_CYTOTOXICITY	GO_REGULATION_OF_T_CELL_MEDIATED_CYTOTOXICITY		33	0.6252606	1.6965058	0.037383176	0.068811886	0.98	4696	tags=42%, list=9%, signal=46%
GO_ICOSANOID_BIOSYNTHETIC_PROCESS	GO_ICOSANOID_BIOSYNTHETIC_PROCESS		36	0.51300865	1.6963946	0.012389381	0.0687797	0.98	4530	tags=33%, list=8%, signal=36%
GO_ISOTYPE_SWITCHING_TO_IGG_ISOTYPES	GO_ISOTYPE_SWITCHING_TO_IGG_ISOTYPES		14	0.7422485	1.6950122	0.012750455	0.069584504	0.98	3680	tags=50%, list=7%, signal=54%
GO_DNA_DOUBLE_STRAND_BREAK_PROCESSING_INVOLVED_IN_REPAIR_VIA_SINGLE_STRAND_ANNEALING	GO_DNA_DOUBLE_STRAND_BREAK_PROCESSING_INVOLVED_IN_REPAIR_VIA_SINGLE_STRAND_ANNEALING		6	0.8614747	1.6945063	0	0.06981565	0.982	6379	tags=67%, list=12%, signal=75%
GO_POSITIVE_REGULATION_OF_INTERLEUKIN_1_PRODUCTION	GO_POSITIVE_REGULATION_OF_INTERLEUKIN_1_PRODUCTION		51	0.5156673	1.6941214	0.009041592	0.06995503	0.982	13870	tags=51%, list=25%, signal=68%
GO_NEGATIVE_REGULATION_OF_MICROGLIAL_CELL_ACTIVATION	GO_NEGATIVE_REGULATION_OF_MICROGLIAL_CELL_ACTIVATION		6	0.88279885	1.6939772	0.001956947	0.06992592	0.982	2938	tags=50%, list=5%, signal=53%
GO_VIRAL_GENOME_REPLICATION	GO_VIRAL_GENOME_REPLICATION		122	0.49809352	1.6929836	0.010889292	0.07045497	0.982	7302	tags=40%, list=13%, signal=46%
GO_REGULATION_OF_ENDOTHELIAL_TUBE_MORPHOGENESIS	GO_REGULATION_OF_ENDOTHELIAL_TUBE_MORPHOGENESIS		5	0.86921304	1.6929457	0.01119403	0.07035611	0.982	5012	tags=60%, list=9%, signal=66%
GO_NEGATIVE_REGULATION_OF_ADENYLATE_CYCLASE_ACTIVITY	GO_NEGATIVE_REGULATION_OF_ADENYLATE_CYCLASE_ACTIVITY		18	0.61089414	1.6926085	0.008849558	0.07045636	0.982	3935	tags=33%, list=7%, signal=36%
GO_REGULATION_OF_INNER_EAR_AUDITORY_RECEPTOR_CELL_DIFFERENTIATION	GO_REGULATION_OF_INNER_EAR_AUDITORY_RECEPTOR_CELL_DIFFERENTIATION		8	0.72221196	1.6919438	0.003683241	0.070838146	0.982	10255	tags=63%, list=19%, signal=77%
GO_T_CELL_CYTOKINE_PRODUCTION	GO_T_CELL_CYTOKINE_PRODUCTION		39	0.57248706	1.691271	0.017985612	0.07120963	0.982	7092	tags=41%, list=13%, signal=47%
GO_MACROPHAGE_COLONY_STIMULATING_FACTOR_PRODUCTION	GO_MACROPHAGE_COLONY_STIMULATING_FACTOR_PRODUCTION		5	0.8909084	1.690959	0.003731343	0.071378484	0.982	3099	tags=80%, list=6%, signal=85%
GO_JNK_CASCADE	GO_JNK_CASCADE		211	0.44219694	1.6898677	0.012681159	0.07206983	0.982	9290	tags=34%, list=17%, signal=41%
GO_MYELOID_LEUKOCYTE_DIFFERENTIATION	GO_MYELOID_LEUKOCYTE_DIFFERENTIATION		200	0.46943188	1.6898624	0.01981982	0.071946196	0.982	7008	tags=31%, list=13%, signal=35%
GO_REGULATION_OF_PROTEIN_K63_LINKED_UBIQUITINATION	GO_REGULATION_OF_PROTEIN_K63_LINKED_UBIQUITINATION		12	0.63917947	1.6895198	0.013182675	0.07208713	0.982	8226	tags=67%, list=15%, signal=78%
GO_REGULATION_OF_DEFENSE_RESPONSE_TO_VIRUS_BY_VIRUS	GO_REGULATION_OF_DEFENSE_RESPONSE_TO_VIRUS_BY_VIRUS		29	0.5785219	1.6892703	0.022857143	0.072139114	0.982	2940	tags=34%, list=5%, signal=36%
GO_POSITIVE_REGULATION_OF_ACTIVATED_T_CELL_PROLIFERATION	GO_POSITIVE_REGULATION_OF_ACTIVATED_T_CELL_PROLIFERATION		25	0.55265987	1.6889088	0.010544815	0.07227315	0.982	4219	tags=32%, list=8%, signal=35%
GO_FATTY_ACID_DERIVATIVE_TRANSPORT	GO_FATTY_ACID_DERIVATIVE_TRANSPORT		47	0.51193744	1.6887046	0.001623377	0.07230779	0.982	8239	tags=43%, list=15%, signal=50%
GO_CYTIDINE_TO_URIDINE_EDITING	GO_CYTIDINE_TO_URIDINE_EDITING		12	0.76146847	1.6879582	0.012867647	0.07272207	0.982	4326	tags=58%, list=8%, signal=63%
GO_POSITIVE_REGULATION_OF_TISSUE_REMODELING	GO_POSITIVE_REGULATION_OF_TISSUE_REMODELING		37	0.49652323	1.6877197	0.014705882	0.07277253	0.982	5129	tags=27%, list=9%, signal=30%
GO_TOLERANCE_INDUCTION_DEPENDENT_UPON_IMMUNE_RESPONSE	GO_TOLERANCE_INDUCTION_DEPENDENT_UPON_IMMUNE_RESPONSE		5	0.8947205	1.6872789	0.006993007	0.07292325	0.982	4485	tags=80%, list=8%, signal=87%
GO_RESPONSE_TO_METHYLMERCURY	GO_RESPONSE_TO_METHYLMERCURY		6	0.8297302	1.6868633	0.003696858	0.073127896	0.982	7585	tags=83%, list=14%, signal=97%
GO_POSITIVE_REGULATION_OF_RHO_PROTEIN_SIGNAL_TRANSDUCTION	GO_POSITIVE_REGULATION_OF_RHO_PROTEIN_SIGNAL_TRANSDUCTION		29	0.6721728	1.6866982	0.02131783	0.07311312	0.982	8369	tags=48%, list=15%, signal=57%
GO_REGULATION_OF_ESTABLISHMENT_OR_MAINTENANCE_OF_CELL_POLARITY	GO_REGULATION_OF_ESTABLISHMENT_OR_MAINTENANCE_OF_CELL_POLARITY		24	0.63518214	1.6857109	0.017475728	0.07369552	0.982	9546	tags=46%, list=17%, signal=55%
GO_REGULATION_OF_T_CELL_ACTIVATION_VIA_T_CELL_RECEPTOR_CONTACT_WITH_ANTIGEN_BOUND_TO_MHC_MOLECULE_ON_ANTIGEN_PRESENTING_CELL	GO_REGULATION_OF_T_CELL_ACTIVATION_VIA_T_CELL_RECEPTOR_CONTACT_WITH_ANTIGEN_BOUND_TO_MHC_MOLECULE_ON_ANTIGEN_PRESENTING_CELL		5	0.9596163	1.6856074	0	0.07363926	0.982	1591	tags=80%, list=3%, signal=82%
GO_REGULATION_OF_MULTI_ORGANISM_PROCESS	GO_REGULATION_OF_MULTI_ORGANISM_PROCESS		401	0.42055124	1.6852517	0.003418803	0.0737793	0.983	7662	tags=33%, list=14%, signal=38%
GO_RESPONSE_TO_INTERLEUKIN_6	GO_RESPONSE_TO_INTERLEUKIN_6		46	0.5420429	1.6850367	0.015957447	0.07384776	0.983	5245	tags=33%, list=10%, signal=36%
GO_REGULATION_OF_RESPONSE_TO_INTERFERON_GAMMA	GO_REGULATION_OF_RESPONSE_TO_INTERFERON_GAMMA		25	0.5921828	1.6846503	0.02255639	0.0740165	0.983	8425	tags=56%, list=15%, signal=66%
GO_POSITIVE_REGULATION_OF_B_CELL_MEDIATED_IMMUNITY	GO_POSITIVE_REGULATION_OF_B_CELL_MEDIATED_IMMUNITY		38	0.60102165	1.6842968	0.014545455	0.0741796	0.983	9048	tags=47%, list=16%, signal=57%
GO_REGULATION_OF_JUN_KINASE_ACTIVITY	GO_REGULATION_OF_JUN_KINASE_ACTIVITY		86	0.4878757	1.6837072	0.014814815	0.07449275	0.983	10019	tags=36%, list=18%, signal=44%
GO_ACUTE_INFLAMMATORY_RESPONSE_TO_ANTIGENIC_STIMULUS	GO_ACUTE_INFLAMMATORY_RESPONSE_TO_ANTIGENIC_STIMULUS		22	0.6092326	1.6834491	0.02292769	0.07454708	0.983	8497	tags=64%, list=15%, signal=75%
GO_DEADENYLATION_DEPENDENT_DECAPPING_OF_NUCLEAR_TRANSCRIBED_MRNA	GO_DEADENYLATION_DEPENDENT_DECAPPING_OF_NUCLEAR_TRANSCRIBED_MRNA		10	0.72113186	1.6834426	0.015717093	0.07443571	0.983	1401	tags=30%, list=3%, signal=31%
GO_NEGATIVE_REGULATION_OF_ANTIGEN_PROCESSING_AND_PRESENTATION	GO_NEGATIVE_REGULATION_OF_ANTIGEN_PROCESSING_AND_PRESENTATION		8	0.80372894	1.6833315	0.016949153	0.07443792	0.983	3452	tags=63%, list=6%, signal=67%
GO_REGULATION_OF_ENDOTHELIAL_CELL_DIFFERENTIATION	GO_REGULATION_OF_ENDOTHELIAL_CELL_DIFFERENTIATION		39	0.5545293	1.6820455	0.012987013	0.07525947	0.983	15234	tags=54%, list=28%, signal=74%
GO_MEMBRANE_RAFT_LOCALIZATION	GO_MEMBRANE_RAFT_LOCALIZATION		6	0.8762746	1.6818831	0.00744879	0.07525459	0.983	1973	tags=67%, list=4%, signal=69%
GO_MONOCYTE_EXTRAVASATION	GO_MONOCYTE_EXTRAVASATION		8	0.78004014	1.6814052	0.021611001	0.075493135	0.983	7624	tags=75%, list=14%, signal=87%
GO_I_KAPPAB_PHOSPHORYLATION	GO_I_KAPPAB_PHOSPHORYLATION		18	0.6243457	1.6807085	0.013157895	0.07584433	0.983	7624	tags=61%, list=14%, signal=71%
GO_REGULATION_OF_SYSTEMIC_ARTERIAL_BLOOD_PRESSURE_BY_RENIN_ANGIOTENSIN	GO_REGULATION_OF_SYSTEMIC_ARTERIAL_BLOOD_PRESSURE_BY_RENIN_ANGIOTENSIN		25	0.6314755	1.6805029	0.023423424	0.07587634	0.983	1630	tags=24%, list=3%, signal=25%
GO_RESPONSE_TO_INTERLEUKIN_4	GO_RESPONSE_TO_INTERLEUKIN_4		35	0.54692614	1.6797509	0.008912656	0.07627549	0.984	9445	tags=51%, list=17%, signal=62%
GO_PHASIC_SMOOTH_MUSCLE_CONTRACTION	GO_PHASIC_SMOOTH_MUSCLE_CONTRACTION		21	0.62455237	1.6794634	0.011308562	0.0764042	0.984	6225	tags=43%, list=11%, signal=48%
GO_RHO_PROTEIN_SIGNAL_TRANSDUCTION	GO_RHO_PROTEIN_SIGNAL_TRANSDUCTION		201	0.48954058	1.6792442	0.024253732	0.076445796	0.984	5781	tags=29%, list=10%, signal=33%
GO_PHOSPHATIDYLINOSITOL_METABOLIC_PROCESS	GO_PHOSPHATIDYLINOSITOL_METABOLIC_PROCESS		103	0.51047814	1.679201	0.013108614	0.07635591	0.984	6043	tags=35%, list=11%, signal=39%
GO_POSITIVE_REGULATION_OF_NATURAL_KILLER_CELL_PROLIFERATION	GO_POSITIVE_REGULATION_OF_NATURAL_KILLER_CELL_PROLIFERATION		8	0.7939859	1.6787834	0.005940594	0.076541565	0.984	7459	tags=50%, list=14%, signal=58%
GO_PROGRAMMED_NECROTIC_CELL_DEATH	GO_PROGRAMMED_NECROTIC_CELL_DEATH		46	0.4862873	1.6784047	0.02014652	0.076717034	0.985	6562	tags=35%, list=12%, signal=39%
GO_POSITIVE_REGULATION_OF_GAMMA_DELTA_T_CELL_ACTIVATION	GO_POSITIVE_REGULATION_OF_GAMMA_DELTA_T_CELL_ACTIVATION		6	0.9242513	1.6782744	0.002016129	0.07668997	0.985	2295	tags=83%, list=4%, signal=87%
GO_REGULATION_OF_T_CELL_TOLERANCE_INDUCTION	GO_REGULATION_OF_T_CELL_TOLERANCE_INDUCTION		10	0.7819838	1.677921	0.018083183	0.07682506	0.985	1483	tags=50%, list=3%, signal=51%
GO_NUCLEOTIDE_BINDING_OLIGOMERIZATION_DOMAIN_CONTAINING_2_SIGNALING_PATHWAY	GO_NUCLEOTIDE_BINDING_OLIGOMERIZATION_DOMAIN_CONTAINING_2_SIGNALING_PATHWAY		13	0.7082028	1.677853	0.023255814	0.076753184	0.985	4255	tags=38%, list=8%, signal=42%
GO_POSITIVE_REGULATION_OF_LIPID_KINASE_ACTIVITY	GO_POSITIVE_REGULATION_OF_LIPID_KINASE_ACTIVITY		35	0.5963326	1.6773238	0.027322404	0.077028535	0.985	6216	tags=40%, list=11%, signal=45%
GO_POSITIVE_REGULATION_OF_CHEMOKINE_SECRETION	GO_POSITIVE_REGULATION_OF_CHEMOKINE_SECRETION		15	0.6573782	1.6772772	0.011406845	0.07693691	0.985	10505	tags=53%, list=19%, signal=66%
GO_NEUROTRANSMITTER_BIOSYNTHETIC_PROCESS	GO_NEUROTRANSMITTER_BIOSYNTHETIC_PROCESS		97	0.47462913	1.6769427	0.00170068	0.07710216	0.987	8601	tags=40%, list=16%, signal=48%
GO_SOMATIC_DIVERSIFICATION_OF_T_CELL_RECEPTOR_GENES	GO_SOMATIC_DIVERSIFICATION_OF_T_CELL_RECEPTOR_GENES		5	0.87051386	1.6768899	0.013645224	0.077020206	0.987	6256	tags=80%, list=11%, signal=90%
GO_LOCOMOTION	GO_LOCOMOTION		1897	0.42583263	1.676786	0.010362694	0.076980464	0.987	6965	tags=28%, list=13%, signal=31%
GO_SYNAPSE_PRUNING	GO_SYNAPSE_PRUNING		10	0.7569342	1.6765981	0.018656716	0.07698567	0.987	4644	tags=70%, list=8%, signal=76%
GO_POSITIVE_REGULATION_OF_ASTROCYTE_DIFFERENTIATION	GO_POSITIVE_REGULATION_OF_ASTROCYTE_DIFFERENTIATION		16	0.60470295	1.675943	0.010830325	0.07734926	0.987	2244	tags=31%, list=4%, signal=33%
GO_MICROGLIAL_CELL_MIGRATION	GO_MICROGLIAL_CELL_MIGRATION		7	0.844752	1.675648	0.015122874	0.077419944	0.987	2275	tags=57%, list=4%, signal=60%
GO_MONOCYTE_ACTIVATION	GO_MONOCYTE_ACTIVATION		9	0.72400653	1.6755179	0.003696858	0.07739991	0.988	2008	tags=22%, list=4%, signal=23%
GO_INTERLEUKIN_12_SECRETION	GO_INTERLEUKIN_12_SECRETION		9	0.7924219	1.6746557	0.014492754	0.07794463	0.988	1591	tags=56%, list=3%, signal=57%
GO_MEMBRANE_RAFT_DISTRIBUTION	GO_MEMBRANE_RAFT_DISTRIBUTION		5	0.94828737	1.6743611	0	0.07806942	0.989	1973	tags=80%, list=4%, signal=83%
GO_POSITIVE_REGULATION_OF_T_CELL_RECEPTOR_SIGNALING_PATHWAY	GO_POSITIVE_REGULATION_OF_T_CELL_RECEPTOR_SIGNALING_PATHWAY		13	0.73702985	1.6739527	0.017142856	0.07829999	0.99	1298	tags=38%, list=2%, signal=39%
GO_CYTOPLASMIC_MRNA_PROCESSING_BODY_ASSEMBLY	GO_CYTOPLASMIC_MRNA_PROCESSING_BODY_ASSEMBLY		21	0.6300159	1.6739494	0.027237354	0.078176305	0.99	3626	tags=43%, list=7%, signal=46%
GO_LIPOPOLYSACCHARIDE_MEDIATED_SIGNALING_PATHWAY	GO_LIPOPOLYSACCHARIDE_MEDIATED_SIGNALING_PATHWAY		56	0.5370378	1.673484	0.018450184	0.078400634	0.99	4255	tags=34%, list=8%, signal=37%
GO_PRO_B_CELL_DIFFERENTIATION	GO_PRO_B_CELL_DIFFERENTIATION		11	0.6992571	1.6728259	0.015779093	0.07877287	0.99	6256	tags=45%, list=11%, signal=51%
GO_RESPONSE_TO_STEROL	GO_RESPONSE_TO_STEROL		32	0.5433541	1.6718835	0.005328597	0.07939611	0.99	11721	tags=47%, list=21%, signal=59%
GO_INTERLEUKIN_8_BIOSYNTHETIC_PROCESS	GO_INTERLEUKIN_8_BIOSYNTHETIC_PROCESS		14	0.6818125	1.6713554	0.017793594	0.07965266	0.99	4524	tags=50%, list=8%, signal=54%
GO_POSITIVE_REGULATION_OF_INTERLEUKIN_12_BIOSYNTHETIC_PROCESS	GO_POSITIVE_REGULATION_OF_INTERLEUKIN_12_BIOSYNTHETIC_PROCESS		5	0.8665995	1.6710157	0.007619048	0.0797767	0.99	4255	tags=60%, list=8%, signal=65%
GO_NEGATIVE_REGULATION_OF_INTERLEUKIN_8_PRODUCTION	GO_NEGATIVE_REGULATION_OF_INTERLEUKIN_8_PRODUCTION		17	0.6262817	1.6709505	0.019305019	0.07970329	0.99	10019	tags=65%, list=18%, signal=79%
GO_GRANULOCYTE_COLONY_STIMULATING_FACTOR_PRODUCTION	GO_GRANULOCYTE_COLONY_STIMULATING_FACTOR_PRODUCTION		5	0.8852847	1.6707954	0.003717472	0.07966742	0.99	3099	tags=80%, list=6%, signal=85%
GO_EPIDERMIS_DEVELOPMENT	GO_EPIDERMIS_DEVELOPMENT		460	0.43921462	1.6693482	0.008561644	0.08066269	0.99	11451	tags=38%, list=21%, signal=47%
GO_REGULATION_OF_ANION_CHANNEL_ACTIVITY	GO_REGULATION_OF_ANION_CHANNEL_ACTIVITY		9	0.71128696	1.6688852	0.018832391	0.08089993	0.99	7380	tags=67%, list=13%, signal=77%
GO_NATURAL_KILLER_CELL_PROLIFERATION	GO_NATURAL_KILLER_CELL_PROLIFERATION		11	0.7219912	1.6677111	0.024952015	0.08178518	0.99	7459	tags=45%, list=14%, signal=53%
GO_REGULATION_OF_DEFENSE_RESPONSE_TO_VIRUS	GO_REGULATION_OF_DEFENSE_RESPONSE_TO_VIRUS		71	0.50267965	1.667438	0.026168223	0.08188753	0.99	3859	tags=27%, list=7%, signal=29%
GO_POSITIVE_REGULATION_OF_CHEMOTAXIS	GO_POSITIVE_REGULATION_OF_CHEMOTAXIS		130	0.49514702	1.6673964	0.025362318	0.08179068	0.99	5617	tags=31%, list=10%, signal=34%
GO_NEGATIVE_REGULATION_OF_INTERFERON_GAMMA_PRODUCTION	GO_NEGATIVE_REGULATION_OF_INTERFERON_GAMMA_PRODUCTION		32	0.555997	1.666963	0.012411348	0.08201254	0.99	6122	tags=44%, list=11%, signal=49%
GO_CYTOPLASMIC_PATTERN_RECOGNITION_RECEPTOR_SIGNALING_PATHWAY	GO_CYTOPLASMIC_PATTERN_RECOGNITION_RECEPTOR_SIGNALING_PATHWAY		62	0.5047905	1.6661849	0.024208566	0.0825106	0.991	7266	tags=37%, list=13%, signal=43%
GO_CD4_POSITIVE_CD25_POSITIVE_ALPHA_BETA_REGULATORY_T_CELL_DIFFERENTIATION	GO_CD4_POSITIVE_CD25_POSITIVE_ALPHA_BETA_REGULATORY_T_CELL_DIFFERENTIATION		5	0.9712407	1.665536	0.001851852	0.08289287	0.992	1591	tags=100%, list=3%, signal=103%
GO_POSITIVE_REGULATION_OF_INTERLEUKIN_23_PRODUCTION	GO_POSITIVE_REGULATION_OF_INTERLEUKIN_23_PRODUCTION		5	0.87641096	1.6654229	0.015355086	0.08282883	0.992	488	tags=60%, list=1%, signal=61%
GO_INTERLEUKIN_35_MEDIATED_SIGNALING_PATHWAY	GO_INTERLEUKIN_35_MEDIATED_SIGNALING_PATHWAY		11	0.77107155	1.6648263	0.016759777	0.08313678	0.992	4075	tags=64%, list=7%, signal=69%
GO_HETEROTYPIC_CELL_CELL_ADHESION	GO_HETEROTYPIC_CELL_CELL_ADHESION		61	0.51869845	1.6645101	0.018248174	0.083252646	0.992	6122	tags=36%, list=11%, signal=41%
GO_REGULATION_OF_FC_GAMMA_RECEPTOR_SIGNALING_PATHWAY_INVOLVED_IN_PHAGOCYTOSIS	GO_REGULATION_OF_FC_GAMMA_RECEPTOR_SIGNALING_PATHWAY_INVOLVED_IN_PHAGOCYTOSIS		7	0.83341175	1.6642454	0.011857707	0.083329566	0.992	5963	tags=71%, list=11%, signal=80%
GO_POSITIVE_REGULATION_OF_NATURAL_KILLER_CELL_MEDIATED_IMMUNE_RESPONSE_TO_TUMOR_CELL	GO_POSITIVE_REGULATION_OF_NATURAL_KILLER_CELL_MEDIATED_IMMUNE_RESPONSE_TO_TUMOR_CELL		9	0.7916711	1.6640667	0.014545455	0.08336249	0.992	2089	tags=67%, list=4%, signal=69%
GO_NEGATIVE_T_CELL_SELECTION	GO_NEGATIVE_T_CELL_SELECTION		12	0.807921	1.6636196	0.014625229	0.08359998	0.992	790	tags=58%, list=1%, signal=59%
GO_COMMON_MYELOID_PROGENITOR_CELL_PROLIFERATION	GO_COMMON_MYELOID_PROGENITOR_CELL_PROLIFERATION		7	0.74767107	1.6627395	0.015544041	0.084151596	0.993	5593	tags=57%, list=10%, signal=64%
GO_POSITIVE_REGULATION_OF_CYTOPLASMIC_MRNA_PROCESSING_BODY_ASSEMBLY	GO_POSITIVE_REGULATION_OF_CYTOPLASMIC_MRNA_PROCESSING_BODY_ASSEMBLY		6	0.879843	1.6621984	0.005825243	0.084474586	0.993	3626	tags=83%, list=7%, signal=89%
GO_NEGATIVE_REGULATION_OF_RESPONSE_TO_EXTERNAL_STIMULUS	GO_NEGATIVE_REGULATION_OF_RESPONSE_TO_EXTERNAL_STIMULUS		339	0.4208378	1.6621901	0.00660066	0.08434971	0.993	6225	tags=28%, list=11%, signal=31%
GO_POSITIVE_REGULATION_OF_SMOOTH_MUSCLE_CELL_PROLIFERATION	GO_POSITIVE_REGULATION_OF_SMOOTH_MUSCLE_CELL_PROLIFERATION		97	0.48545483	1.6621875	0.009009009	0.08422324	0.993	5314	tags=29%, list=10%, signal=32%
GO_INTERLEUKIN_6_BIOSYNTHETIC_PROCESS	GO_INTERLEUKIN_6_BIOSYNTHETIC_PROCESS		22	0.59927773	1.6618996	0.021238938	0.08434788	0.994	4333	tags=41%, list=8%, signal=44%
GO_SEROTONIN_SECRETION	GO_SEROTONIN_SECRETION		10	0.7435225	1.6613082	0.014035088	0.08467646	0.994	2472	tags=40%, list=4%, signal=42%
GO_POSITIVE_REGULATION_OF_INTERLEUKIN_2_BIOSYNTHETIC_PROCESS	GO_POSITIVE_REGULATION_OF_INTERLEUKIN_2_BIOSYNTHETIC_PROCESS		13	0.7765292	1.6611956	0.019267824	0.08461798	0.994	2386	tags=54%, list=4%, signal=56%
GO_B_CELL_CHEMOTAXIS	GO_B_CELL_CHEMOTAXIS		8	0.73536193	1.6611183	0.01192843	0.08453307	0.994	2871	tags=50%, list=5%, signal=53%
GO_BETA_CATENIN_TCF_COMPLEX_ASSEMBLY	GO_BETA_CATENIN_TCF_COMPLEX_ASSEMBLY		30	0.62932384	1.6610842	0.017408123	0.08444428	0.994	9574	tags=47%, list=17%, signal=56%
GO_CELLULAR_RESPONSE_TO_MAGNESIUM_ION	GO_CELLULAR_RESPONSE_TO_MAGNESIUM_ION		7	0.7645265	1.6608175	0.012962963	0.08454391	0.994	5856	tags=43%, list=11%, signal=48%
GO_REGULATION_OF_VIRAL_ENTRY_INTO_HOST_CELL	GO_REGULATION_OF_VIRAL_ENTRY_INTO_HOST_CELL		30	0.5696937	1.6605977	0.032928944	0.08458885	0.994	7420	tags=47%, list=13%, signal=54%
GO_METANEPHRIC_TUBULE_MORPHOGENESIS	GO_METANEPHRIC_TUBULE_MORPHOGENESIS		11	0.6888216	1.6599941	0.008503402	0.08493179	0.994	13750	tags=64%, list=25%, signal=85%
GO_MONONUCLEAR_CELL_DIFFERENTIATION	GO_MONONUCLEAR_CELL_DIFFERENTIATION		37	0.544978	1.6592704	0.014981274	0.085418046	0.995	11233	tags=43%, list=20%, signal=54%
GO_INTERLEUKIN_23_PRODUCTION	GO_INTERLEUKIN_23_PRODUCTION		7	0.7880027	1.6592631	0.015384615	0.08529218	0.995	4255	tags=57%, list=8%, signal=62%
GO_MATURE_B_CELL_DIFFERENTIATION	GO_MATURE_B_CELL_DIFFERENTIATION		25	0.6545125	1.6588227	0.03492647	0.08549281	0.995	2142	tags=40%, list=4%, signal=42%
GO_GENITALIA_MORPHOGENESIS	GO_GENITALIA_MORPHOGENESIS		14	0.70189005	1.6572934	0.010928961	0.08659251	0.995	10488	tags=64%, list=19%, signal=79%
GO_POSITIVE_REGULATION_OF_MRNA_CATABOLIC_PROCESS	GO_POSITIVE_REGULATION_OF_MRNA_CATABOLIC_PROCESS		47	0.59384453	1.6572005	0.029239766	0.0865215	0.995	6644	tags=45%, list=12%, signal=51%
GO_REGULATION_OF_CYTOSOLIC_CALCIUM_ION_CONCENTRATION	GO_REGULATION_OF_CYTOSOLIC_CALCIUM_ION_CONCENTRATION		351	0.4560199	1.6567895	0.016611295	0.08674698	0.995	5848	tags=27%, list=11%, signal=30%
GO_PHOSPHATIDYLINOSITOL_3_PHOSPHATE_BIOSYNTHETIC_PROCESS	GO_PHOSPHATIDYLINOSITOL_3_PHOSPHATE_BIOSYNTHETIC_PROCESS		14	0.74488676	1.6560699	0.007920792	0.087164894	0.995	5227	tags=64%, list=9%, signal=71%
GO_MYELOID_CELL_DIFFERENTIATION	GO_MYELOID_CELL_DIFFERENTIATION		407	0.42782936	1.6559908	0.012455516	0.087100424	0.995	7216	tags=28%, list=13%, signal=32%
GO_REGULATION_OF_HUMORAL_IMMUNE_RESPONSE_MEDIATED_BY_CIRCULATING_IMMUNOGLOBULIN	GO_REGULATION_OF_HUMORAL_IMMUNE_RESPONSE_MEDIATED_BY_CIRCULATING_IMMUNOGLOBULIN		11	0.7786183	1.6552117	0.008865248	0.087636374	0.995	1551	tags=55%, list=3%, signal=56%
GO_PEPTIDE_CROSS_LINKING	GO_PEPTIDE_CROSS_LINKING		60	0.6979202	1.6552022	0.04347826	0.08750972	0.995	11284	tags=73%, list=20%, signal=92%
GO_KILLING_OF_CELLS_OF_OTHER_ORGANISM	GO_KILLING_OF_CELLS_OF_OTHER_ORGANISM		60	0.5038695	1.6548556	0.006033183	0.08766239	0.995	8865	tags=42%, list=16%, signal=50%
GO_MACROPHAGE_PROLIFERATION	GO_MACROPHAGE_PROLIFERATION		8	0.75358367	1.6537503	0.003577818	0.088427626	0.995	9990	tags=63%, list=18%, signal=76%
GO_NEGATIVE_REGULATION_OF_RESPONSE_TO_BIOTIC_STIMULUS	GO_NEGATIVE_REGULATION_OF_RESPONSE_TO_BIOTIC_STIMULUS		43	0.4996223	1.6537373	0.010928961	0.08830605	0.995	3512	tags=30%, list=6%, signal=32%
GO_POSITIVE_REGULATION_OF_PROTEIN_LOCALIZATION_TO_CELL_CORTEX	GO_POSITIVE_REGULATION_OF_PROTEIN_LOCALIZATION_TO_CELL_CORTEX		5	0.86495894	1.6536118	0.014112903	0.088285476	0.995	6463	tags=60%, list=12%, signal=68%
GO_NEGATIVE_REGULATION_OF_CD8_POSITIVE_ALPHA_BETA_T_CELL_ACTIVATION	GO_NEGATIVE_REGULATION_OF_CD8_POSITIVE_ALPHA_BETA_T_CELL_ACTIVATION		6	0.815994	1.6532724	0.004158004	0.088511445	0.996	2132	tags=67%, list=4%, signal=69%
GO_PARTURITION	GO_PARTURITION		16	0.61029685	1.6531788	0.027642276	0.088461965	0.996	5918	tags=38%, list=11%, signal=42%
GO_MYELOID_CELL_APOPTOTIC_PROCESS	GO_MYELOID_CELL_APOPTOTIC_PROCESS		32	0.51885724	1.6515201	0.012389381	0.08973594	0.996	5593	tags=34%, list=10%, signal=38%
GO_POSITIVE_REGULATION_OF_SECONDARY_METABOLITE_BIOSYNTHETIC_PROCESS	GO_POSITIVE_REGULATION_OF_SECONDARY_METABOLITE_BIOSYNTHETIC_PROCESS		7	0.74168086	1.6515183	0.013384321	0.0896028	0.996	2997	tags=43%, list=5%, signal=45%
GO_CALCIUM_ION_IMPORT_INTO_CYTOSOL	GO_CALCIUM_ION_IMPORT_INTO_CYTOSOL		13	0.65050006	1.6514792	0.014059754	0.08951583	0.996	5580	tags=46%, list=10%, signal=51%
GO_POSITIVE_REGULATION_OF_TUMOR_NECROSIS_FACTOR_BIOSYNTHETIC_PROCESS	GO_POSITIVE_REGULATION_OF_TUMOR_NECROSIS_FACTOR_BIOSYNTHETIC_PROCESS		14	0.69269884	1.6513538	0.024074074	0.08948786	0.996	4932	tags=50%, list=9%, signal=55%
GO_POSITIVE_REGULATION_OF_JUN_KINASE_ACTIVITY	GO_POSITIVE_REGULATION_OF_JUN_KINASE_ACTIVITY		72	0.49934614	1.6508318	0.015037594	0.08979229	0.996	10019	tags=36%, list=18%, signal=44%
GO_RESPONSE_TO_INTERLEUKIN_2	GO_RESPONSE_TO_INTERLEUKIN_2		14	0.6875371	1.6506356	0.017274473	0.08984057	0.996	5137	tags=57%, list=9%, signal=63%
GO_REGULATION_OF_VIRAL_LIFE_CYCLE	GO_REGULATION_OF_VIRAL_LIFE_CYCLE		144	0.4626552	1.6502117	0.008928572	0.09004334	0.996	7420	tags=38%, list=13%, signal=44%
GO_RADIAL_GLIAL_CELL_DIFFERENTIATION	GO_RADIAL_GLIAL_CELL_DIFFERENTIATION		12	0.6579827	1.6497369	0.016981132	0.09032337	0.996	9860	tags=50%, list=18%, signal=61%
GO_REGULATION_OF_CELL_ADHESION_MEDIATED_BY_INTEGRIN	GO_REGULATION_OF_CELL_ADHESION_MEDIATED_BY_INTEGRIN		46	0.51769704	1.6493558	0.022968197	0.09051559	0.996	6041	tags=37%, list=11%, signal=41%
GO_POSITIVE_REGULATION_OF_T_CELL_DIFFERENTIATION_IN_THYMUS	GO_POSITIVE_REGULATION_OF_T_CELL_DIFFERENTIATION_IN_THYMUS		11	0.7216527	1.648743	0.012323944	0.09091889	0.996	3143	tags=45%, list=6%, signal=48%
GO_B_1_B_CELL_DIFFERENTIATION	GO_B_1_B_CELL_DIFFERENTIATION		5	0.8853991	1.6487386	0.003766478	0.09079512	0.996	1854	tags=60%, list=3%, signal=62%
GO_REGULATION_OF_DEVELOPMENTAL_PIGMENTATION	GO_REGULATION_OF_DEVELOPMENTAL_PIGMENTATION		16	0.6406646	1.6483994	0.010733453	0.09096067	0.996	4571	tags=44%, list=8%, signal=48%
GO_REGULATION_OF_CELL_SHAPE	GO_REGULATION_OF_CELL_SHAPE		146	0.4795618	1.6477245	0.025408348	0.09140256	0.996	5652	tags=30%, list=10%, signal=33%
GO_POSITIVE_REGULATION_OF_APOPTOTIC_CELL_CLEARANCE	GO_POSITIVE_REGULATION_OF_APOPTOTIC_CELL_CLEARANCE		7	0.87883294	1.6476145	0.007532957	0.091373995	0.996	6692	tags=100%, list=12%, signal=114%
GO_RESPONSE_TO_MURAMYL_DIPEPTIDE	GO_RESPONSE_TO_MURAMYL_DIPEPTIDE		20	0.6122153	1.6471603	0.015564202	0.09167289	0.996	10176	tags=35%, list=18%, signal=43%
GO_NEGATIVE_REGULATION_OF_OSTEOCLAST_DEVELOPMENT	GO_NEGATIVE_REGULATION_OF_OSTEOCLAST_DEVELOPMENT		5	0.85047793	1.6462469	0.010695187	0.09232717	0.996	2965	tags=60%, list=5%, signal=63%
GO_TRANSEPITHELIAL_TRANSPORT	GO_TRANSEPITHELIAL_TRANSPORT		18	0.6115116	1.6460433	0.023809524	0.092366785	0.996	8856	tags=50%, list=16%, signal=60%
GO_RESPONSE_TO_INTERLEUKIN_15	GO_RESPONSE_TO_INTERLEUKIN_15		14	0.7077531	1.6455363	0.038022812	0.09268041	0.996	5137	tags=50%, list=9%, signal=55%
GO_RESPONSE_TO_INTERLEUKIN_17	GO_RESPONSE_TO_INTERLEUKIN_17		9	0.724991	1.6453794	0.010619469	0.09267105	0.996	4587	tags=44%, list=8%, signal=48%
GO_POSITIVE_REGULATION_OF_MAPK_CASCADE	GO_POSITIVE_REGULATION_OF_MAPK_CASCADE		534	0.422232	1.6443449	0.00681431	0.09335869	0.997	8434	tags=32%, list=15%, signal=37%
GO_REGULATION_OF_DEFENSE_RESPONSE_TO_VIRUS_BY_HOST	GO_REGULATION_OF_DEFENSE_RESPONSE_TO_VIRUS_BY_HOST		37	0.56477773	1.6436975	0.03522505	0.093761094	0.997	3657	tags=27%, list=7%, signal=29%
GO_SKIN_DEVELOPMENT	GO_SKIN_DEVELOPMENT		414	0.44542822	1.6430072	0.015706806	0.09420324	0.998	11284	tags=39%, list=20%, signal=48%
GO_KERATINIZATION	GO_KERATINIZATION		223	0.5218068	1.6429331	0.03125	0.094133176	0.998	11451	tags=46%, list=21%, signal=58%
GO_RENAL_WATER_HOMEOSTASIS	GO_RENAL_WATER_HOMEOSTASIS		36	0.5479114	1.6427337	0.012411348	0.09416125	0.998	10625	tags=44%, list=19%, signal=55%
GO_REGULATION_OF_PEPTIDE_SECRETION	GO_REGULATION_OF_PEPTIDE_SECRETION		470	0.4117076	1.6419973	0.007987221	0.09468498	0.998	4735	tags=24%, list=9%, signal=26%
GO_DEFENSE_RESPONSE_TO_GRAM_NEGATIVE_BACTERIUM	GO_DEFENSE_RESPONSE_TO_GRAM_NEGATIVE_BACTERIUM		87	0.4693594	1.6416372	0.006482982	0.09486693	0.998	6109	tags=28%, list=11%, signal=31%
GO_REGULATION_OF_STRESS_ACTIVATED_PROTEIN_KINASE_SIGNALING_CASCADE	GO_REGULATION_OF_STRESS_ACTIVATED_PROTEIN_KINASE_SIGNALING_CASCADE		234	0.42713153	1.6402874	0.018181818	0.09597041	0.998	10649	tags=35%, list=19%, signal=44%
GO_POSITIVE_REGULATION_OF_PHOSPHATIDYLINOSITOL_3_KINASE_SIGNALING	GO_POSITIVE_REGULATION_OF_PHOSPHATIDYLINOSITOL_3_KINASE_SIGNALING		85	0.51847315	1.6401033	0.03362832	0.09599409	0.998	8396	tags=39%, list=15%, signal=46%
GO_NEGATIVE_REGULATION_OF_INTERLEUKIN_8_SECRETION	GO_NEGATIVE_REGULATION_OF_INTERLEUKIN_8_SECRETION		7	0.76459104	1.639788	0.022	0.09614159	0.998	2255	tags=57%, list=4%, signal=60%
GO_INTERFERON_BETA_BIOSYNTHETIC_PROCESS	GO_INTERFERON_BETA_BIOSYNTHETIC_PROCESS		8	0.8185541	1.6395323	0.024291499	0.09624478	0.998	10019	tags=100%, list=18%, signal=122%
GO_POSITIVE_REGULATION_OF_B_CELL_DIFFERENTIATION	GO_POSITIVE_REGULATION_OF_B_CELL_DIFFERENTIATION		12	0.70742947	1.6394824	0.03244275	0.09614087	0.998	1050	tags=42%, list=2%, signal=42%
GO_POSITIVE_REGULATION_OF_ISOTYPE_SWITCHING_TO_IGG_ISOTYPES	GO_POSITIVE_REGULATION_OF_ISOTYPE_SWITCHING_TO_IGG_ISOTYPES		10	0.78432333	1.638894	0.003649635	0.09657067	0.998	3680	tags=50%, list=7%, signal=54%
GO_POSITIVE_REGULATION_OF_UNSATURATED_FATTY_ACID_BIOSYNTHETIC_PROCESS	GO_POSITIVE_REGULATION_OF_UNSATURATED_FATTY_ACID_BIOSYNTHETIC_PROCESS		6	0.7728884	1.6388185	0.022018349	0.096508324	0.998	2203	tags=50%, list=4%, signal=52%
GO_POSITIVE_REGULATION_OF_RUFFLE_ASSEMBLY	GO_POSITIVE_REGULATION_OF_RUFFLE_ASSEMBLY		15	0.594545	1.6386863	0.019748654	0.09647719	0.998	3811	tags=40%, list=7%, signal=43%
GO_CILIARY_NEUROTROPHIC_FACTOR_MEDIATED_SIGNALING_PATHWAY	GO_CILIARY_NEUROTROPHIC_FACTOR_MEDIATED_SIGNALING_PATHWAY		6	0.79740334	1.6386112	0.023809524	0.09640799	0.998	4075	tags=50%, list=7%, signal=54%
GO_MECHANOSENSORY_BEHAVIOR	GO_MECHANOSENSORY_BEHAVIOR		15	0.63532376	1.6383781	0.027874565	0.09647795	0.998	5128	tags=33%, list=9%, signal=37%
GO_CELLULAR_RESPONSE_TO_LIPOPROTEIN_PARTICLE_STIMULUS	GO_CELLULAR_RESPONSE_TO_LIPOPROTEIN_PARTICLE_STIMULUS		32	0.5591168	1.6378673	0.033395175	0.09681682	0.998	4255	tags=34%, list=8%, signal=37%
GO_CELL_JUNCTION_MAINTENANCE	GO_CELL_JUNCTION_MAINTENANCE		14	0.608505	1.637846	0.010619469	0.0966929	0.998	4268	tags=21%, list=8%, signal=23%
GO_PYRIMIDINE_NUCLEOSIDE_CATABOLIC_PROCESS	GO_PYRIMIDINE_NUCLEOSIDE_CATABOLIC_PROCESS		23	0.59509045	1.6369822	0.019855596	0.09728354	0.998	4326	tags=39%, list=8%, signal=42%
GO_NITRIC_OXIDE_BIOSYNTHETIC_PROCESS	GO_NITRIC_OXIDE_BIOSYNTHETIC_PROCESS		74	0.47322285	1.6360896	0.012455516	0.09794167	0.998	8601	tags=42%, list=16%, signal=50%
GO_NEGATIVE_REGULATION_OF_SECRETION	GO_NEGATIVE_REGULATION_OF_SECRETION		224	0.43250886	1.6348838	0.005016722	0.09890955	0.998	4672	tags=26%, list=8%, signal=29%
GO_REGULATION_OF_INORGANIC_ANION_TRANSMEMBRANE_TRANSPORT	GO_REGULATION_OF_INORGANIC_ANION_TRANSMEMBRANE_TRANSPORT		7	0.7189143	1.6346651	0.023255814	0.09897606	0.998	12095	tags=71%, list=22%, signal=91%
GO_CALCIUM_MEDIATED_SIGNALING_USING_INTRACELLULAR_CALCIUM_SOURCE	GO_CALCIUM_MEDIATED_SIGNALING_USING_INTRACELLULAR_CALCIUM_SOURCE		22	0.5569213	1.6344103	0.023809524	0.09906554	0.998	1423	tags=27%, list=3%, signal=28%
GO_NEGATIVE_REGULATION_OF_DEFENSE_RESPONSE_TO_BACTERIUM	GO_NEGATIVE_REGULATION_OF_DEFENSE_RESPONSE_TO_BACTERIUM		6	0.76838374	1.6340646	0.018939395	0.099245586	0.998	1653	tags=50%, list=3%, signal=52%
GO_REGULATION_OF_CHEMOTAXIS	GO_REGULATION_OF_CHEMOTAXIS		208	0.46194884	1.6333089	0.021352313	0.099830054	0.998	8797	tags=35%, list=16%, signal=42%
GO_NEGATIVE_REGULATION_OF_PHOSPHATIDYLINOSITOL_3_KINASE_SIGNALING	GO_NEGATIVE_REGULATION_OF_PHOSPHATIDYLINOSITOL_3_KINASE_SIGNALING		15	0.58546513	1.6324621	0.018329939	0.10040597	0.998	9540	tags=47%, list=17%, signal=56%
GO_CHEMOKINE_C_X_C_MOTIF_LIGAND_2_PRODUCTION	GO_CHEMOKINE_C_X_C_MOTIF_LIGAND_2_PRODUCTION		12	0.6299216	1.6318206	0.03646833	0.10088515	0.998	4333	tags=50%, list=8%, signal=54%
GO_REGULATION_OF_CELLULAR_EXTRAVASATION	GO_REGULATION_OF_CELLULAR_EXTRAVASATION		24	0.6332213	1.6316309	0.024667932	0.10090627	0.998	8158	tags=54%, list=15%, signal=64%
GO_NEGATIVE_REGULATION_OF_INTRACELLULAR_ESTROGEN_RECEPTOR_SIGNALING_PATHWAY	GO_NEGATIVE_REGULATION_OF_INTRACELLULAR_ESTROGEN_RECEPTOR_SIGNALING_PATHWAY		13	0.69583225	1.631617	0.020992367	0.10077873	0.998	5649	tags=46%, list=10%, signal=51%
GO_REGULATION_OF_TOLL_LIKE_RECEPTOR_2_SIGNALING_PATHWAY	GO_REGULATION_OF_TOLL_LIKE_RECEPTOR_2_SIGNALING_PATHWAY		10	0.7010473	1.6315626	0.0227704	0.10068267	0.998	15091	tags=70%, list=27%, signal=96%
GO_LIPOXIN_BIOSYNTHETIC_PROCESS	GO_LIPOXIN_BIOSYNTHETIC_PROCESS		6	0.8199957	1.6315222	0.00729927	0.10057858	0.998	5012	tags=50%, list=9%, signal=55%
GO_ADENOSINE_METABOLIC_PROCESS	GO_ADENOSINE_METABOLIC_PROCESS		5	0.8427217	1.6312544	0.013133208	0.100656986	0.998	4106	tags=60%, list=7%, signal=65%
GO_RAS_PROTEIN_SIGNAL_TRANSDUCTION	GO_RAS_PROTEIN_SIGNAL_TRANSDUCTION		439	0.4448505	1.6311558	0.016853932	0.10060487	0.998	5781	tags=26%, list=10%, signal=29%
GO_NEGATIVE_REGULATION_OF_INTERFERON_ALPHA_PRODUCTION	GO_NEGATIVE_REGULATION_OF_INTERFERON_ALPHA_PRODUCTION		6	0.84247285	1.6310222	0.007736944	0.10059262	0.998	6122	tags=83%, list=11%, signal=94%
GO_ANTIBIOTIC_BIOSYNTHETIC_PROCESS	GO_ANTIBIOTIC_BIOSYNTHETIC_PROCESS		18	0.56996167	1.6309822	0.017825311	0.10048376	0.998	4865	tags=33%, list=9%, signal=37%
GO_MYELOID_CELL_HOMEOSTASIS	GO_MYELOID_CELL_HOMEOSTASIS		145	0.4352778	1.6309383	0.017574692	0.10038563	0.998	10008	tags=35%, list=18%, signal=43%
GO_POSITIVE_REGULATION_OF_RESPONSE_TO_CYTOKINE_STIMULUS	GO_POSITIVE_REGULATION_OF_RESPONSE_TO_CYTOKINE_STIMULUS		55	0.5182013	1.6295582	0.033027522	0.10149885	0.998	6771	tags=38%, list=12%, signal=43%
GO_BIOLOGICAL_ADHESION	GO_BIOLOGICAL_ADHESION		1402	0.43049994	1.6291083	0.019031141	0.10175248	0.998	6948	tags=28%, list=13%, signal=31%
GO_REGULATION_OF_ADENYLATE_CYCLASE_ACTIVITY	GO_REGULATION_OF_ADENYLATE_CYCLASE_ACTIVITY		29	0.5502916	1.6285487	0.018932875	0.10210966	0.998	3935	tags=28%, list=7%, signal=30%
GO_ANTIGEN_PROCESSING_AND_PRESENTATION_OF_LIPID_ANTIGEN_VIA_MHC_CLASS_IB	GO_ANTIGEN_PROCESSING_AND_PRESENTATION_OF_LIPID_ANTIGEN_VIA_MHC_CLASS_IB		7	0.82312435	1.6273344	0.02173913	0.10311998	0.998	9766	tags=100%, list=18%, signal=121%
GO_PHOSPHATIDYLETHANOLAMINE_ACYL_CHAIN_REMODELING	GO_PHOSPHATIDYLETHANOLAMINE_ACYL_CHAIN_REMODELING		23	0.5707036	1.6263576	0.019927537	0.103922114	0.998	6859	tags=43%, list=12%, signal=50%
GO_LEARNED_VOCALIZATION_BEHAVIOR_OR_VOCAL_LEARNING	GO_LEARNED_VOCALIZATION_BEHAVIOR_OR_VOCAL_LEARNING		10	0.68621695	1.6260804	0.021015761	0.10399439	0.998	4003	tags=40%, list=7%, signal=43%
GO_REGULATION_OF_INTEGRIN_ACTIVATION	GO_REGULATION_OF_INTEGRIN_ACTIVATION		13	0.6723333	1.6254194	0.03642987	0.104455344	0.998	12518	tags=62%, list=23%, signal=80%
GO_DETECTION_OF_BIOTIC_STIMULUS	GO_DETECTION_OF_BIOTIC_STIMULUS		22	0.6208309	1.6249915	0.024299065	0.104696795	0.998	6623	tags=45%, list=12%, signal=52%
GO_HISTONE_H3_K36_DEMETHYLATION	GO_HISTONE_H3_K36_DEMETHYLATION		9	0.7437281	1.6248842	0.024667932	0.104640596	0.998	7138	tags=56%, list=13%, signal=64%
GO_NEGATIVE_REGULATION_OF_CHEMOKINE_PRODUCTION	GO_NEGATIVE_REGULATION_OF_CHEMOKINE_PRODUCTION		20	0.55057555	1.6233022	0.018248174	0.10604723	0.998	10613	tags=55%, list=19%, signal=68%
GO_PEPTIDYL_TYROSINE_MODIFICATION	GO_PEPTIDYL_TYROSINE_MODIFICATION		356	0.43206242	1.6230935	0.02108963	0.10606759	0.998	6289	tags=28%, list=11%, signal=31%
GO_PHOSPHATIDYLINOSITOL_PHOSPHORYLATION	GO_PHOSPHATIDYLINOSITOL_PHOSPHORYLATION		50	0.53870904	1.6229049	0.0327553	0.10610316	0.998	6967	tags=36%, list=13%, signal=41%
GO_REGULATION_OF_PROTEIN_LOCALIZATION_TO_ENDOSOME	GO_REGULATION_OF_PROTEIN_LOCALIZATION_TO_ENDOSOME		12	0.6443675	1.6227889	0.025	0.10607005	0.998	5553	tags=42%, list=10%, signal=46%
GO_POSITIVE_REGULATION_OF_RESPIRATORY_BURST	GO_POSITIVE_REGULATION_OF_RESPIRATORY_BURST		8	0.7771177	1.6223959	0.016274864	0.106307186	0.998	5615	tags=63%, list=10%, signal=70%
GO_REGULATION_OF_FC_RECEPTOR_MEDIATED_STIMULATORY_SIGNALING_PATHWAY	GO_REGULATION_OF_FC_RECEPTOR_MEDIATED_STIMULATORY_SIGNALING_PATHWAY		11	0.747361	1.6219215	0.031128405	0.10663889	0.998	5963	tags=55%, list=11%, signal=61%
GO_REGULATION_OF_NUCLEOTIDE_BINDING_OLIGOMERIZATION_DOMAIN_CONTAINING_2_SIGNALING_PATHWAY	GO_REGULATION_OF_NUCLEOTIDE_BINDING_OLIGOMERIZATION_DOMAIN_CONTAINING_2_SIGNALING_PATHWAY		6	0.870438	1.6198431	0.007604563	0.10858947	0.998	4255	tags=50%, list=8%, signal=54%
GO_PROSTATE_GLAND_MORPHOGENESIS	GO_PROSTATE_GLAND_MORPHOGENESIS		28	0.5703969	1.6196234	0.015873017	0.10866977	0.998	12612	tags=54%, list=23%, signal=69%
GO_REGULATION_OF_INFLAMMATORY_RESPONSE_TO_ANTIGENIC_STIMULUS	GO_REGULATION_OF_INFLAMMATORY_RESPONSE_TO_ANTIGENIC_STIMULUS		23	0.6151944	1.6195483	0.03074141	0.1085857	0.998	8642	tags=65%, list=16%, signal=77%
GO_RESPONSE_TO_CELL_CYCLE_CHECKPOINT_SIGNALING	GO_RESPONSE_TO_CELL_CYCLE_CHECKPOINT_SIGNALING		8	0.77388215	1.6190394	0.007736944	0.10890982	0.998	6379	tags=50%, list=12%, signal=57%
GO_REGULATION_OF_MACROPHAGE_MIGRATION	GO_REGULATION_OF_MACROPHAGE_MIGRATION		34	0.54485035	1.6189612	0.020295203	0.10882509	0.998	4605	tags=32%, list=8%, signal=35%
GO_MYD88_INDEPENDENT_TOLL_LIKE_RECEPTOR_SIGNALING_PATHWAY	GO_MYD88_INDEPENDENT_TOLL_LIKE_RECEPTOR_SIGNALING_PATHWAY		32	0.53583884	1.6179897	0.026415095	0.109691575	0.998	6771	tags=41%, list=12%, signal=46%
GO_POSITIVE_REGULATION_OF_TRANSFORMING_GROWTH_FACTOR_BETA_PRODUCTION	GO_POSITIVE_REGULATION_OF_TRANSFORMING_GROWTH_FACTOR_BETA_PRODUCTION		19	0.6005624	1.6178482	0.027173912	0.10970511	0.998	4605	tags=37%, list=8%, signal=40%
GO_EMBRYONIC_CAMERA_TYPE_EYE_FORMATION	GO_EMBRYONIC_CAMERA_TYPE_EYE_FORMATION		12	0.6871472	1.6174996	0.020942409	0.10992121	0.998	7805	tags=42%, list=14%, signal=49%
GO_NATURAL_KILLER_CELL_CYTOKINE_PRODUCTION	GO_NATURAL_KILLER_CELL_CYTOKINE_PRODUCTION		8	0.8098412	1.6173846	0.019157087	0.109874494	0.998	2952	tags=50%, list=5%, signal=53%
GO_POSITIVE_REGULATION_OF_REACTIVE_OXYGEN_SPECIES_BIOSYNTHETIC_PROCESS	GO_POSITIVE_REGULATION_OF_REACTIVE_OXYGEN_SPECIES_BIOSYNTHETIC_PROCESS		54	0.48526847	1.6172581	0.012195122	0.10983984	0.998	8345	tags=39%, list=15%, signal=46%
GO_EOSINOPHIL_CHEMOTAXIS	GO_EOSINOPHIL_CHEMOTAXIS		20	0.64469224	1.6171927	0.031468533	0.109755166	0.998	7901	tags=55%, list=14%, signal=64%
GO_REGULATION_OF_RESPONSE_TO_STRESS	GO_REGULATION_OF_RESPONSE_TO_STRESS		1471	0.39600766	1.6167104	0.012152778	0.11004725	0.998	9029	tags=31%, list=16%, signal=36%
GO_REGULATION_OF_VASCULATURE_DEVELOPMENT	GO_REGULATION_OF_VASCULATURE_DEVELOPMENT		389	0.42090264	1.6165894	0.021978023	0.11001626	0.998	7432	tags=30%, list=13%, signal=34%
GO_RESPONSE_TO_UV_B	GO_RESPONSE_TO_UV_B		18	0.57552284	1.6153105	0.02300885	0.11108929	0.999	10035	tags=50%, list=18%, signal=61%
GO_NERVE_GROWTH_FACTOR_SIGNALING_PATHWAY	GO_NERVE_GROWTH_FACTOR_SIGNALING_PATHWAY		12	0.64867365	1.6142685	0.0317757	0.111951694	0.999	8089	tags=42%, list=15%, signal=49%
GO_ARF_PROTEIN_SIGNAL_TRANSDUCTION	GO_ARF_PROTEIN_SIGNAL_TRANSDUCTION		19	0.6092235	1.6142656	0.023346303	0.111809134	0.999	7612	tags=42%, list=14%, signal=49%
GO_PHOSPHOLIPASE_C_ACTIVATING_G_PROTEIN_COUPLED_RECEPTOR_SIGNALING_PATHWAY	GO_PHOSPHOLIPASE_C_ACTIVATING_G_PROTEIN_COUPLED_RECEPTOR_SIGNALING_PATHWAY		99	0.49556056	1.6142575	0.01512605	0.11167052	0.999	6658	tags=30%, list=12%, signal=34%
GO_NEGATIVE_REGULATION_OF_LEUKOCYTE_CHEMOTAXIS	GO_NEGATIVE_REGULATION_OF_LEUKOCYTE_CHEMOTAXIS		18	0.6360698	1.6140935	0.026501767	0.11166103	0.999	6156	tags=50%, list=11%, signal=56%
GO_VASCULAR_ENDOTHELIAL_CELL_PROLIFERATION	GO_VASCULAR_ENDOTHELIAL_CELL_PROLIFERATION		38	0.4773815	1.613589	0.028301887	0.1120155	0.999	13725	tags=37%, list=25%, signal=49%
GO_NEGATIVE_REGULATION_OF_REACTIVE_OXYGEN_SPECIES_BIOSYNTHETIC_PROCESS	GO_NEGATIVE_REGULATION_OF_REACTIVE_OXYGEN_SPECIES_BIOSYNTHETIC_PROCESS		32	0.5061465	1.6118765	0.021484375	0.11357282	0.999	8601	tags=41%, list=16%, signal=48%
GO_NEGATIVE_REGULATION_OF_ENDOTHELIAL_CELL_CHEMOTAXIS	GO_NEGATIVE_REGULATION_OF_ENDOTHELIAL_CELL_CHEMOTAXIS		6	0.72633195	1.6113935	0.031914894	0.11392041	0.999	1476	tags=33%, list=3%, signal=34%
GO_NK_T_CELL_DIFFERENTIATION	GO_NK_T_CELL_DIFFERENTIATION		8	0.7709791	1.6103725	0.025793651	0.11481628	0.999	2132	tags=50%, list=4%, signal=52%
GO_EPITHELIAL_CELL_CELL_ADHESION	GO_EPITHELIAL_CELL_CELL_ADHESION		15	0.6045058	1.6103166	0.033989266	0.114721216	0.999	6202	tags=40%, list=11%, signal=45%
GO_POSITIVE_REGULATION_OF_MACROPHAGE_ACTIVATION	GO_POSITIVE_REGULATION_OF_MACROPHAGE_ACTIVATION		29	0.54307	1.6101259	0.026070764	0.11472057	0.999	6948	tags=41%, list=13%, signal=47%
GO_POSITIVE_REGULATION_OF_INTRACELLULAR_SIGNAL_TRANSDUCTION	GO_POSITIVE_REGULATION_OF_INTRACELLULAR_SIGNAL_TRANSDUCTION		1000	0.39464214	1.6096036	0.015202703	0.11509882	0.999	7029	tags=27%, list=13%, signal=31%
GO_PROTEIN_ADP_RIBOSYLATION	GO_PROTEIN_ADP_RIBOSYLATION		33	0.5701775	1.6089352	0.027422303	0.11562484	0.999	8037	tags=48%, list=15%, signal=57%
GO_IRON_IMPORT_INTO_CELL	GO_IRON_IMPORT_INTO_CELL		5	0.80333453	1.6086645	0.00996016	0.11575692	0.999	3967	tags=60%, list=7%, signal=65%
GO_NEURONAL_STEM_CELL_POPULATION_MAINTENANCE	GO_NEURONAL_STEM_CELL_POPULATION_MAINTENANCE		21	0.6217608	1.6085229	0.035580523	0.115755565	0.999	10542	tags=62%, list=19%, signal=76%
GO_REGULATION_OF_PEPTIDYL_TYROSINE_PHOSPHORYLATION	GO_REGULATION_OF_PEPTIDYL_TYROSINE_PHOSPHORYLATION		246	0.42983454	1.6074994	0.016157988	0.11665534	0.999	6289	tags=27%, list=11%, signal=30%
GO_POSITIVE_REGULATION_OF_SYNAPTIC_TRANSMISSION_GLUTAMATERGIC	GO_POSITIVE_REGULATION_OF_SYNAPTIC_TRANSMISSION_GLUTAMATERGIC		33	0.5732247	1.60746	0.017452007	0.11655383	0.999	6708	tags=36%, list=12%, signal=41%
GO_PROSTANOID_BIOSYNTHETIC_PROCESS	GO_PROSTANOID_BIOSYNTHETIC_PROCESS		24	0.515567	1.6073657	0.022346368	0.116485946	0.999	4530	tags=33%, list=8%, signal=36%
GO_ERK1_AND_ERK2_CASCADE	GO_ERK1_AND_ERK2_CASCADE		305	0.4330224	1.6061418	0.013513514	0.117586926	0.999	8797	tags=35%, list=16%, signal=41%
GO_REGULATION_OF_CHEMOKINE_MEDIATED_SIGNALING_PATHWAY	GO_REGULATION_OF_CHEMOKINE_MEDIATED_SIGNALING_PATHWAY		9	0.6792069	1.6057822	0.014981274	0.11780725	0.999	6889	tags=44%, list=12%, signal=51%
GO_NEGATIVE_REGULATION_OF_VASCULATURE_DEVELOPMENT	GO_NEGATIVE_REGULATION_OF_VASCULATURE_DEVELOPMENT		166	0.42383727	1.605457	0.027777778	0.11795402	0.999	7370	tags=26%, list=13%, signal=30%
GO_PHOSPHATIDYLINOSITOL_DEPHOSPHORYLATION	GO_PHOSPHATIDYLINOSITOL_DEPHOSPHORYLATION		25	0.62057394	1.6039635	0.031067962	0.119346306	0.999	5769	tags=44%, list=10%, signal=49%
GO_POSITIVE_REGULATION_OF_NITRIC_OXIDE_BIOSYNTHETIC_PROCESS	GO_POSITIVE_REGULATION_OF_NITRIC_OXIDE_BIOSYNTHETIC_PROCESS		42	0.51519984	1.6005412	0.024561403	0.12285345	1	5615	tags=36%, list=10%, signal=40%
GO_REGULATION_OF_EOSINOPHIL_MIGRATION	GO_REGULATION_OF_EOSINOPHIL_MIGRATION		5	0.85678804	1.5996141	0.01192843	0.12366995	1	2733	tags=60%, list=5%, signal=63%
GO_REGULATION_OF_MYELOID_DENDRITIC_CELL_ACTIVATION	GO_REGULATION_OF_MYELOID_DENDRITIC_CELL_ACTIVATION		8	0.8431468	1.5993636	0.02819549	0.123747714	1	8662	tags=100%, list=16%, signal=119%
GO_INSULIN_METABOLIC_PROCESS	GO_INSULIN_METABOLIC_PROCESS		6	0.8029106	1.598829	0.026548672	0.12411814	1	8932	tags=67%, list=16%, signal=80%
GO_NEGATIVE_REGULATION_OF_GLIOGENESIS	GO_NEGATIVE_REGULATION_OF_GLIOGENESIS		42	0.50629675	1.5984524	0.013355592	0.1243801	1	7138	tags=31%, list=13%, signal=36%
GO_POSITIVE_REGULATION_OF_T_CELL_MEDIATED_CYTOTOXICITY	GO_POSITIVE_REGULATION_OF_T_CELL_MEDIATED_CYTOTOXICITY		26	0.60714304	1.5984365	0.061068702	0.12423621	1	10035	tags=54%, list=18%, signal=66%
GO_SKELETAL_MUSCLE_CELL_PROLIFERATION	GO_SKELETAL_MUSCLE_CELL_PROLIFERATION		15	0.63488054	1.5983578	0.011235955	0.12415309	1	8018	tags=60%, list=15%, signal=70%
GO_REGULATION_OF_TRANSPOSITION	GO_REGULATION_OF_TRANSPOSITION		23	0.5971592	1.5973136	0.035149384	0.12514311	1	7101	tags=43%, list=13%, signal=50%
GO_NEUTROPHIL_DIFFERENTIATION	GO_NEUTROPHIL_DIFFERENTIATION		9	0.6685405	1.597132	0.023255814	0.12513986	1	6946	tags=44%, list=13%, signal=51%
GO_MULTI_ORGANISM_MEMBRANE_ORGANIZATION	GO_MULTI_ORGANISM_MEMBRANE_ORGANIZATION		10	0.6835914	1.5956484	0.034798536	0.12650423	1	3247	tags=40%, list=6%, signal=42%
GO_POSITIVE_REGULATION_OF_B_CELL_RECEPTOR_SIGNALING_PATHWAY	GO_POSITIVE_REGULATION_OF_B_CELL_RECEPTOR_SIGNALING_PATHWAY		8	0.7645331	1.5952203	0.026923077	0.12678549	1	960	tags=50%, list=2%, signal=51%
GO_ENDOTHELIAL_CELL_ACTIVATION	GO_ENDOTHELIAL_CELL_ACTIVATION		10	0.7094375	1.5951365	0.01610018	0.12671337	1	4895	tags=50%, list=9%, signal=55%
GO_GROWTH_HORMONE_RECEPTOR_SIGNALING_PATHWAY_VIA_JAK_STAT	GO_GROWTH_HORMONE_RECEPTOR_SIGNALING_PATHWAY_VIA_JAK_STAT		13	0.65806466	1.5950822	0.045375217	0.12660615	1	5349	tags=46%, list=10%, signal=51%
GO_POSITIVE_REGULATION_OF_RENAL_SODIUM_EXCRETION	GO_POSITIVE_REGULATION_OF_RENAL_SODIUM_EXCRETION		14	0.650646	1.5949016	0.02910959	0.12666292	1	4530	tags=36%, list=8%, signal=39%
GO_RESPONSE_TO_OXYGEN_GLUCOSE_DEPRIVATION	GO_RESPONSE_TO_OXYGEN_GLUCOSE_DEPRIVATION		9	0.6625973	1.594796	0.030181086	0.12661266	1	6099	tags=44%, list=11%, signal=50%
GO_TRANSFORMING_GROWTH_FACTOR_BETA1_PRODUCTION	GO_TRANSFORMING_GROWTH_FACTOR_BETA1_PRODUCTION		12	0.65661573	1.594556	0.033464566	0.1266989	1	6840	tags=50%, list=12%, signal=57%
GO_REGULATION_OF_CAMP_DEPENDENT_PROTEIN_KINASE_ACTIVITY	GO_REGULATION_OF_CAMP_DEPENDENT_PROTEIN_KINASE_ACTIVITY		16	0.61737037	1.5930711	0.03256705	0.12814383	1	6835	tags=38%, list=12%, signal=43%
GO_NEGATIVE_REGULATION_OF_INTERLEUKIN_1_BETA_SECRETION	GO_NEGATIVE_REGULATION_OF_INTERLEUKIN_1_BETA_SECRETION		12	0.64170283	1.5923742	0.023090586	0.12874876	1	8092	tags=42%, list=15%, signal=49%
GO_DENDRITIC_CELL_ANTIGEN_PROCESSING_AND_PRESENTATION	GO_DENDRITIC_CELL_ANTIGEN_PROCESSING_AND_PRESENTATION		11	0.7442082	1.5921601	0.031657357	0.12878375	1	6216	tags=64%, list=11%, signal=72%
GO_MULTICELLULAR_ORGANISMAL_HOMEOSTASIS	GO_MULTICELLULAR_ORGANISMAL_HOMEOSTASIS		476	0.4036531	1.5918287	0.01	0.12898156	1	10665	tags=35%, list=19%, signal=43%
GO_CELLULAR_RESPONSE_TO_STEROL	GO_CELLULAR_RESPONSE_TO_STEROL		24	0.55248874	1.5918058	0.035149384	0.12884216	1	11721	tags=54%, list=21%, signal=69%
GO_REGULATION_OF_GAMMA_DELTA_T_CELL_DIFFERENTIATION	GO_REGULATION_OF_GAMMA_DELTA_T_CELL_DIFFERENTIATION		6	0.86503565	1.590639	0.005736138	0.12993602	1	2977	tags=67%, list=5%, signal=70%
GO_T_HELPER_1_CELL_CYTOKINE_PRODUCTION	GO_T_HELPER_1_CELL_CYTOKINE_PRODUCTION		7	0.7565712	1.5906149	0.020332716	0.12980087	1	1326	tags=43%, list=2%, signal=44%
GO_NEGATIVE_REGULATION_OF_CELLULAR_EXTRAVASATION	GO_NEGATIVE_REGULATION_OF_CELLULAR_EXTRAVASATION		8	0.7028783	1.5898182	0.032015067	0.13056113	1	8158	tags=63%, list=15%, signal=73%
GO_POSITIVE_REGULATION_OF_VIRAL_ENTRY_INTO_HOST_CELL	GO_POSITIVE_REGULATION_OF_VIRAL_ENTRY_INTO_HOST_CELL		9	0.71353316	1.5889459	0.044660196	0.13135134	1	3212	tags=67%, list=6%, signal=71%
GO_NEGATIVE_REGULATION_OF_RIG_I_SIGNALING_PATHWAY	GO_NEGATIVE_REGULATION_OF_RIG_I_SIGNALING_PATHWAY		8	0.69064736	1.5888417	0.0234375	0.13129354	1	1614	tags=38%, list=3%, signal=39%
GO_MATURE_B_CELL_DIFFERENTIATION_INVOLVED_IN_IMMUNE_RESPONSE	GO_MATURE_B_CELL_DIFFERENTIATION_INVOLVED_IN_IMMUNE_RESPONSE		19	0.6258598	1.5884327	0.05225225	0.13159616	1	4284	tags=42%, list=8%, signal=46%
GO_SOMATIC_DIVERSIFICATION_OF_IMMUNE_RECEPTORS_VIA_GERMLINE_RECOMBINATION_WITHIN_A_SINGLE_LOCUS	GO_SOMATIC_DIVERSIFICATION_OF_IMMUNE_RECEPTORS_VIA_GERMLINE_RECOMBINATION_WITHIN_A_SINGLE_LOCUS		59	0.53798705	1.5882745	0.04007286	0.13161243	1	6256	tags=36%, list=11%, signal=40%
GO_CIRCADIAN_SLEEP_WAKE_CYCLE_SLEEP	GO_CIRCADIAN_SLEEP_WAKE_CYCLE_SLEEP		20	0.6304077	1.5874717	0.018487396	0.13233507	1	4467	tags=45%, list=8%, signal=49%
GO_POSITIVE_REGULATION_OF_MHC_CLASS_I_BIOSYNTHETIC_PROCESS	GO_POSITIVE_REGULATION_OF_MHC_CLASS_I_BIOSYNTHETIC_PROCESS		5	0.8082442	1.5868263	0.013108614	0.1329072	1	2034	tags=40%, list=4%, signal=42%
GO_REGULATION_OF_CYTOPLASMIC_MRNA_PROCESSING_BODY_ASSEMBLY	GO_REGULATION_OF_CYTOPLASMIC_MRNA_PROCESSING_BODY_ASSEMBLY		10	0.70652735	1.5860448	0.028735632	0.13360856	1	3626	tags=60%, list=7%, signal=64%
GO_AMINO_ACID_BETAINE_BIOSYNTHETIC_PROCESS	GO_AMINO_ACID_BETAINE_BIOSYNTHETIC_PROCESS		7	0.75295776	1.584973	0.044061303	0.13468313	1	7245	tags=57%, list=13%, signal=66%
GO_POSITIVE_REGULATION_OF_VASCULATURE_DEVELOPMENT	GO_POSITIVE_REGULATION_OF_VASCULATURE_DEVELOPMENT		213	0.44108957	1.5847313	0.036036037	0.13480861	1	7082	tags=33%, list=13%, signal=38%
GO_ANTIGEN_PROCESSING_AND_PRESENTATION_ENDOGENOUS_LIPID_ANTIGEN_VIA_MHC_CLASS_IB	GO_ANTIGEN_PROCESSING_AND_PRESENTATION_ENDOGENOUS_LIPID_ANTIGEN_VIA_MHC_CLASS_IB		5	0.92522925	1.5844873	0.007782101	0.13489394	1	4130	tags=100%, list=7%, signal=108%
GO_REGULATION_OF_GOLGI_ORGANIZATION	GO_REGULATION_OF_GOLGI_ORGANIZATION		15	0.5976738	1.5841403	0.043392505	0.13513207	1	3826	tags=27%, list=7%, signal=29%
GO_REGULATION_OF_ACTIN_NUCLEATION	GO_REGULATION_OF_ACTIN_NUCLEATION		28	0.53903943	1.5837458	0.028625954	0.1354451	1	4980	tags=29%, list=9%, signal=31%
GO_V_D_J_RECOMBINATION	GO_V_D_J_RECOMBINATION		13	0.64528733	1.5833228	0.034615386	0.1357749	1	6256	tags=46%, list=11%, signal=52%
GO_PREPULSE_INHIBITION	GO_PREPULSE_INHIBITION		15	0.62988955	1.582339	0.017699115	0.1366607	1	10316	tags=53%, list=19%, signal=66%
GO_IMMUNOGLOBULIN_PRODUCTION_INVOLVED_IN_IMMUNOGLOBULIN_MEDIATED_IMMUNE_RESPONSE	GO_IMMUNOGLOBULIN_PRODUCTION_INVOLVED_IN_IMMUNOGLOBULIN_MEDIATED_IMMUNE_RESPONSE		55	0.5393058	1.5823226	0.04472272	0.13651569	1	9048	tags=40%, list=16%, signal=48%
GO_INTERLEUKIN_4_MEDIATED_SIGNALING_PATHWAY	GO_INTERLEUKIN_4_MEDIATED_SIGNALING_PATHWAY		7	0.77665025	1.5816587	0.021235522	0.13706174	1	6948	tags=86%, list=13%, signal=98%
GO_POSITIVE_REGULATION_OF_VASCULAR_ENDOTHELIAL_CELL_PROLIFERATION	GO_POSITIVE_REGULATION_OF_VASCULAR_ENDOTHELIAL_CELL_PROLIFERATION		21	0.56997937	1.5816344	0.040816326	0.1369187	1	13725	tags=57%, list=25%, signal=76%
GO_SALIVA_SECRETION	GO_SALIVA_SECRETION		12	0.72275555	1.5814626	0.01880342	0.13695021	1	4551	tags=58%, list=8%, signal=64%
GO_CELL_CELL_ADHESION_MEDIATED_BY_INTEGRIN	GO_CELL_CELL_ADHESION_MEDIATED_BY_INTEGRIN		16	0.63827306	1.5809811	0.036608864	0.13733561	1	4197	tags=44%, list=8%, signal=47%
GO_NEGATIVE_REGULATION_OF_DNA_ENDOREDUPLICATION	GO_NEGATIVE_REGULATION_OF_DNA_ENDOREDUPLICATION		7	0.8268503	1.5801024	0.021868788	0.13816394	1	9007	tags=86%, list=16%, signal=102%
GO_REGULATION_OF_SYMBIOSIS_ENCOMPASSING_MUTUALISM_THROUGH_PARASITISM	GO_REGULATION_OF_SYMBIOSIS_ENCOMPASSING_MUTUALISM_THROUGH_PARASITISM		227	0.41898674	1.5797675	0.017953321	0.13837326	1	7420	tags=35%, list=13%, signal=40%
GO_DETECTION_OF_VIRUS	GO_DETECTION_OF_VIRUS		6	0.7594205	1.5795249	0.022088353	0.13845675	1	3714	tags=67%, list=7%, signal=71%
GO_MODIFICATION_OF_MORPHOLOGY_OR_PHYSIOLOGY_OF_OTHER_ORGANISM	GO_MODIFICATION_OF_MORPHOLOGY_OR_PHYSIOLOGY_OF_OTHER_ORGANISM		159	0.3897236	1.57877	0.001569859	0.13913395	1	8865	tags=33%, list=16%, signal=40%
GO_BONE_CELL_DEVELOPMENT	GO_BONE_CELL_DEVELOPMENT		34	0.5298538	1.5786678	0.04536862	0.13910474	1	6300	tags=38%, list=11%, signal=43%
GO_PROTEIN_GLYCOSYLATION_IN_GOLGI	GO_PROTEIN_GLYCOSYLATION_IN_GOLGI		5	0.7910841	1.5783093	0.00967118	0.1394028	1	9791	tags=60%, list=18%, signal=73%
GO_CORNIFICATION	GO_CORNIFICATION		112	0.57986623	1.5775832	0.07553957	0.14004895	1	6350	tags=44%, list=12%, signal=49%
GO_REGULATION_OF_MEMBRANE_TUBULATION	GO_REGULATION_OF_MEMBRANE_TUBULATION		6	0.7936808	1.5766526	0.0317757	0.1408892	1	3076	tags=50%, list=6%, signal=53%
GO_NEGATIVE_REGULATION_OF_NF_KAPPAB_TRANSCRIPTION_FACTOR_ACTIVITY	GO_NEGATIVE_REGULATION_OF_NF_KAPPAB_TRANSCRIPTION_FACTOR_ACTIVITY		85	0.44870114	1.5761019	0.028985508	0.14131586	1	6419	tags=29%, list=12%, signal=33%
GO_NEGATIVE_REGULATION_OF_OSSIFICATION	GO_NEGATIVE_REGULATION_OF_OSSIFICATION		74	0.48439777	1.5759423	0.019784173	0.14132705	1	8345	tags=32%, list=15%, signal=38%
GO_RESPIRATORY_BURST_INVOLVED_IN_DEFENSE_RESPONSE	GO_RESPIRATORY_BURST_INVOLVED_IN_DEFENSE_RESPONSE		13	0.6534662	1.5755763	0.02504817	0.14156507	1	1854	tags=31%, list=3%, signal=32%
GO_REGULATION_OF_SECONDARY_METABOLIC_PROCESS	GO_REGULATION_OF_SECONDARY_METABOLIC_PROCESS		13	0.64661056	1.5749809	0.044061303	0.14213768	1	4116	tags=46%, list=7%, signal=50%
GO_ERYTHROCYTE_DEVELOPMENT	GO_ERYTHROCYTE_DEVELOPMENT		30	0.4965688	1.5748682	0.027422303	0.14208184	1	7422	tags=33%, list=13%, signal=38%
GO_MULTI_ORGANISM_MEMBRANE_FUSION	GO_MULTI_ORGANISM_MEMBRANE_FUSION		7	0.77440184	1.5740768	0.019157087	0.14285973	1	552	tags=43%, list=1%, signal=43%
GO_INOSITOL_TRISPHOSPHATE_BIOSYNTHETIC_PROCESS	GO_INOSITOL_TRISPHOSPHATE_BIOSYNTHETIC_PROCESS		23	0.5289218	1.5740465	0.023131672	0.14272745	1	12325	tags=43%, list=22%, signal=56%
GO_NEGATIVE_REGULATION_OF_NLRP3_INFLAMMASOME_COMPLEX_ASSEMBLY	GO_NEGATIVE_REGULATION_OF_NLRP3_INFLAMMASOME_COMPLEX_ASSEMBLY		5	0.759055	1.5738125	0.039473683	0.14283533	1	3707	tags=40%, list=7%, signal=43%
GO_POSITIVE_REGULATION_OF_PEPTIDE_SECRETION	GO_POSITIVE_REGULATION_OF_PEPTIDE_SECRETION		271	0.40066984	1.5737896	0.012861736	0.14269182	1	9327	tags=31%, list=17%, signal=37%
GO_NEGATIVE_REGULATION_OF_T_CELL_CYTOKINE_PRODUCTION	GO_NEGATIVE_REGULATION_OF_T_CELL_CYTOKINE_PRODUCTION		9	0.7080619	1.572557	0.03550296	0.14392786	1	6358	tags=56%, list=12%, signal=63%
GO_ADAPTIVE_THERMOGENESIS	GO_ADAPTIVE_THERMOGENESIS		151	0.43889043	1.5715737	0.021390375	0.14487739	1	8214	tags=33%, list=15%, signal=39%
GO_REGULATION_OF_BLOOD_VOLUME_BY_RENIN_ANGIOTENSIN	GO_REGULATION_OF_BLOOD_VOLUME_BY_RENIN_ANGIOTENSIN		8	0.724207	1.5715724	0.025316456	0.14470977	1	1630	tags=25%, list=3%, signal=26%
GO_POSITIVE_REGULATION_OF_MONONUCLEAR_CELL_MIGRATION	GO_POSITIVE_REGULATION_OF_MONONUCLEAR_CELL_MIGRATION		22	0.57072043	1.5715187	0.047016274	0.14461198	1	8345	tags=45%, list=15%, signal=54%
GO_POSITIVE_REGULATION_OF_AUTOPHAGY	GO_POSITIVE_REGULATION_OF_AUTOPHAGY		114	0.4467519	1.5708706	0.04474708	0.14515673	1	7366	tags=32%, list=13%, signal=36%
GO_NEGATIVE_REGULATION_OF_CHEMOKINE_MEDIATED_SIGNALING_PATHWAY	GO_NEGATIVE_REGULATION_OF_CHEMOKINE_MEDIATED_SIGNALING_PATHWAY		6	0.779278	1.5695704	0.013435701	0.14656745	1	6889	tags=50%, list=12%, signal=57%
GO_POSITIVE_REGULATION_OF_TRANSFORMING_GROWTH_FACTOR_BETA1_PRODUCTION	GO_POSITIVE_REGULATION_OF_TRANSFORMING_GROWTH_FACTOR_BETA1_PRODUCTION		7	0.75795484	1.5693268	0.027944112	0.14669892	1	2938	tags=43%, list=5%, signal=45%
GO_POSITIVE_REGULATION_OF_FC_RECEPTOR_MEDIATED_STIMULATORY_SIGNALING_PATHWAY	GO_POSITIVE_REGULATION_OF_FC_RECEPTOR_MEDIATED_STIMULATORY_SIGNALING_PATHWAY		7	0.8268643	1.5692394	0.029411765	0.14664121	1	4162	tags=57%, list=8%, signal=62%
GO_REGULATION_OF_ASTROCYTE_DIFFERENTIATION	GO_REGULATION_OF_ASTROCYTE_DIFFERENTIATION		34	0.49728364	1.569162	0.016949153	0.1465656	1	7138	tags=32%, list=13%, signal=37%
GO_PRIMARY_AMINO_COMPOUND_METABOLIC_PROCESS	GO_PRIMARY_AMINO_COMPOUND_METABOLIC_PROCESS		8	0.67839813	1.5680683	0.041431263	0.14774589	1	15354	tags=75%, list=28%, signal=104%
GO_RESPONSE_TO_INTERFERON_ALPHA	GO_RESPONSE_TO_INTERFERON_ALPHA		20	0.62719274	1.5675552	0.073033705	0.14817564	1	9884	tags=65%, list=18%, signal=79%
GO_HISTONE_H3_K4_DEMETHYLATION_TRIMETHYL_H3_K4_SPECIFIC	GO_HISTONE_H3_K4_DEMETHYLATION_TRIMETHYL_H3_K4_SPECIFIC		5	0.8253189	1.5669034	0.02357564	0.1487087	1	6189	tags=60%, list=11%, signal=68%
GO_POSITIVE_REGULATION_OF_MAP_KINASE_ACTIVITY	GO_POSITIVE_REGULATION_OF_MAP_KINASE_ACTIVITY		256	0.41758737	1.5667682	0.028119508	0.14869884	1	9187	tags=32%, list=17%, signal=38%
GO_BONE_TRABECULA_MORPHOGENESIS	GO_BONE_TRABECULA_MORPHOGENESIS		13	0.6460203	1.566326	0.038732395	0.14902951	1	6753	tags=46%, list=12%, signal=53%
GO_THYROID_HORMONE_METABOLIC_PROCESS	GO_THYROID_HORMONE_METABOLIC_PROCESS		20	0.5811914	1.566311	0.028021015	0.14886881	1	8497	tags=50%, list=15%, signal=59%
GO_MICROGLIAL_CELL_PROLIFERATION	GO_MICROGLIAL_CELL_PROLIFERATION		6	0.8087943	1.5661701	0.01831502	0.14889061	1	9990	tags=83%, list=18%, signal=102%
GO_NEGATIVE_REGULATION_OF_ESTABLISHMENT_OF_PROTEIN_LOCALIZATION	GO_NEGATIVE_REGULATION_OF_ESTABLISHMENT_OF_PROTEIN_LOCALIZATION		182	0.4079584	1.5656787	0.024305556	0.14926837	1	8924	tags=33%, list=16%, signal=39%
GO_POSITIVE_REGULATION_OF_HYDROLASE_ACTIVITY	GO_POSITIVE_REGULATION_OF_HYDROLASE_ACTIVITY		747	0.3949797	1.5654138	0.034050178	0.14941016	1	5965	tags=25%, list=11%, signal=28%
GO_AUDITORY_RECEPTOR_CELL_FATE_COMMITMENT	GO_AUDITORY_RECEPTOR_CELL_FATE_COMMITMENT		7	0.70933336	1.5648049	0.050847456	0.14996397	1	6837	tags=57%, list=12%, signal=65%
GO_INTERLEUKIN_18_MEDIATED_SIGNALING_PATHWAY	GO_INTERLEUKIN_18_MEDIATED_SIGNALING_PATHWAY		8	0.7168223	1.5646455	0.040697675	0.1499951	1	4683	tags=63%, list=8%, signal=68%
GO_NEGATIVE_REGULATION_OF_CYTOPLASMIC_TRANSLATION	GO_NEGATIVE_REGULATION_OF_CYTOPLASMIC_TRANSLATION		8	0.713783	1.5646281	0.024761904	0.14983793	1	5942	tags=63%, list=11%, signal=70%
GO_PLASMA_MEMBRANE_TUBULATION	GO_PLASMA_MEMBRANE_TUBULATION		22	0.5518914	1.5644484	0.048828125	0.14986373	1	3999	tags=27%, list=7%, signal=29%
GO_LIVER_MORPHOGENESIS	GO_LIVER_MORPHOGENESIS		17	0.5755686	1.5644455	0.023550725	0.14970155	1	4450	tags=35%, list=8%, signal=38%
GO_INOSITOL_PHOSPHATE_METABOLIC_PROCESS	GO_INOSITOL_PHOSPHATE_METABOLIC_PROCESS		47	0.47832987	1.5637614	0.023636363	0.15035066	1	3948	tags=28%, list=7%, signal=30%
GO_POSITIVE_REGULATION_OF_TUMOR_NECROSIS_FACTOR_SECRETION	GO_POSITIVE_REGULATION_OF_TUMOR_NECROSIS_FACTOR_SECRETION		15	0.6268005	1.563747	0.03074141	0.15019186	1	3910	tags=40%, list=7%, signal=43%
GO_POSITIVE_REGULATION_OF_RESPONSE_TO_INTERFERON_GAMMA	GO_POSITIVE_REGULATION_OF_RESPONSE_TO_INTERFERON_GAMMA		6	0.770648	1.563547	0.015009381	0.15028057	1	2193	tags=50%, list=4%, signal=52%
GO_POSITIVE_REGULATION_OF_DENDRITIC_CELL_ANTIGEN_PROCESSING_AND_PRESENTATION	GO_POSITIVE_REGULATION_OF_DENDRITIC_CELL_ANTIGEN_PROCESSING_AND_PRESENTATION		7	0.77437544	1.5634658	0.027522936	0.15019894	1	6216	tags=71%, list=11%, signal=80%
GO_STRESS_ACTIVATED_PROTEIN_KINASE_SIGNALING_CASCADE	GO_STRESS_ACTIVATED_PROTEIN_KINASE_SIGNALING_CASCADE		310	0.40435737	1.5632341	0.03448276	0.15032059	1	10649	tags=35%, list=19%, signal=43%
GO_INTERLEUKIN_3_MEDIATED_SIGNALING_PATHWAY	GO_INTERLEUKIN_3_MEDIATED_SIGNALING_PATHWAY		5	0.8647271	1.5631491	0.014869888	0.15023033	1	2472	tags=80%, list=4%, signal=84%
GO_POSITIVE_REGULATION_OF_INTERLEUKIN_8_BIOSYNTHETIC_PROCESS	GO_POSITIVE_REGULATION_OF_INTERLEUKIN_8_BIOSYNTHETIC_PROCESS		9	0.71813357	1.5629181	0.04778761	0.1503381	1	12444	tags=78%, list=23%, signal=100%
GO_NEGATIVE_REGULATION_OF_LYASE_ACTIVITY	GO_NEGATIVE_REGULATION_OF_LYASE_ACTIVITY		22	0.53144675	1.562739	0.02195946	0.15041049	1	3935	tags=27%, list=7%, signal=29%
GO_POSITIVE_REGULATION_OF_COLD_INDUCED_THERMOGENESIS	GO_POSITIVE_REGULATION_OF_COLD_INDUCED_THERMOGENESIS		97	0.440992	1.5627099	0.017391304	0.15028489	1	6948	tags=30%, list=13%, signal=34%
GO_POSITIVE_REGULATION_OF_SPROUTING_ANGIOGENESIS	GO_POSITIVE_REGULATION_OF_SPROUTING_ANGIOGENESIS		58	0.47130388	1.5622871	0.037701976	0.1506587	1	11695	tags=45%, list=21%, signal=57%
GO_PRI_MIRNA_TRANSCRIPTION_BY_RNA_POLYMERASE_II	GO_PRI_MIRNA_TRANSCRIPTION_BY_RNA_POLYMERASE_II		44	0.516827	1.5620745	0.041509435	0.15072536	1	7057	tags=39%, list=13%, signal=44%
GO_IMMUNE_RESPONSE_INHIBITING_CELL_SURFACE_RECEPTOR_SIGNALING_PATHWAY	GO_IMMUNE_RESPONSE_INHIBITING_CELL_SURFACE_RECEPTOR_SIGNALING_PATHWAY		6	0.78621936	1.5616994	0.03505535	0.15097539	1	864	tags=33%, list=2%, signal=34%
GO_POSITIVE_REGULATION_OF_HUMORAL_IMMUNE_RESPONSE_MEDIATED_BY_CIRCULATING_IMMUNOGLOBULIN	GO_POSITIVE_REGULATION_OF_HUMORAL_IMMUNE_RESPONSE_MEDIATED_BY_CIRCULATING_IMMUNOGLOBULIN		5	0.85957247	1.5614187	0.02014652	0.151157	1	1488	tags=60%, list=3%, signal=62%
GO_REGULATION_OF_MAP_KINASE_ACTIVITY	GO_REGULATION_OF_MAP_KINASE_ACTIVITY		334	0.40904766	1.5613486	0.03214286	0.15105714	1	9290	tags=31%, list=17%, signal=38%
GO_PROTEIN_NITROSYLATION	GO_PROTEIN_NITROSYLATION		15	0.5569608	1.5600667	0.02398524	0.15251529	1	5840	tags=47%, list=11%, signal=52%
GO_RESPONSE_TO_NITRIC_OXIDE	GO_RESPONSE_TO_NITRIC_OXIDE		19	0.60641605	1.5582962	0.028089888	0.15447302	1	6216	tags=42%, list=11%, signal=47%
GO_POSITIVE_REGULATION_OF_LEUKOCYTE_DEGRANULATION	GO_POSITIVE_REGULATION_OF_LEUKOCYTE_DEGRANULATION		23	0.535445	1.557826	0.041984733	0.15485334	1	6948	tags=35%, list=13%, signal=40%
GO_POSITIVE_REGULATION_OF_CYTOKINESIS	GO_POSITIVE_REGULATION_OF_CYTOKINESIS		40	0.5170262	1.5575514	0.05100182	0.15500407	1	14960	tags=48%, list=27%, signal=65%
GO_POSITIVE_REGULATION_OF_MICROGLIAL_CELL_ACTIVATION	GO_POSITIVE_REGULATION_OF_MICROGLIAL_CELL_ACTIVATION		13	0.62690604	1.5570618	0.046558704	0.15542434	1	4644	tags=46%, list=8%, signal=50%
GO_REGULATION_OF_PROTEIN_POLYUBIQUITINATION	GO_REGULATION_OF_PROTEIN_POLYUBIQUITINATION		22	0.5324848	1.5570071	0.04496403	0.15531611	1	8664	tags=50%, list=16%, signal=59%
GO_REGULATION_OF_T_CELL_DIFFERENTIATION_IN_THYMUS	GO_REGULATION_OF_T_CELL_DIFFERENTIATION_IN_THYMUS		23	0.5537971	1.5569841	0.036906853	0.15517007	1	5199	tags=35%, list=9%, signal=38%
GO_REGULATION_OF_MYELOID_CELL_DIFFERENTIATION	GO_REGULATION_OF_MYELOID_CELL_DIFFERENTIATION		249	0.42068237	1.5565668	0.029038113	0.15550826	1	10665	tags=35%, list=19%, signal=44%
GO_REGULATION_OF_TOLL_LIKE_RECEPTOR_9_SIGNALING_PATHWAY	GO_REGULATION_OF_TOLL_LIKE_RECEPTOR_9_SIGNALING_PATHWAY		9	0.6601277	1.5563654	0.032319393	0.15558247	1	1106	tags=33%, list=2%, signal=34%
GO_HEMATOPOIETIC_STEM_CELL_MIGRATION	GO_HEMATOPOIETIC_STEM_CELL_MIGRATION		6	0.7748522	1.5562954	0.02173913	0.15547985	1	4571	tags=67%, list=8%, signal=73%
GO_NEUTROPHIL_MEDIATED_CYTOTOXICITY	GO_NEUTROPHIL_MEDIATED_CYTOTOXICITY		10	0.6418798	1.5561764	0.02680067	0.15543973	1	6915	tags=40%, list=13%, signal=46%
GO_PEPTIDE_SECRETION	GO_PEPTIDE_SECRETION		590	0.38680995	1.5561192	0.009787928	0.15532315	1	4735	tags=23%, list=9%, signal=24%
GO_SLEEP	GO_SLEEP		31	0.54013026	1.5559621	0.03	0.15534231	1	6138	tags=39%, list=11%, signal=44%
GO_PROTEIN_TRANSPORT_INTO_MEMBRANE_RAFT	GO_PROTEIN_TRANSPORT_INTO_MEMBRANE_RAFT		5	0.7631322	1.5556203	0.034136545	0.15555336	1	2547	tags=60%, list=5%, signal=63%
GO_NEGATIVE_REGULATION_OF_GLIAL_CELL_DIFFERENTIATION	GO_NEGATIVE_REGULATION_OF_GLIAL_CELL_DIFFERENTIATION		26	0.53972256	1.555608	0.03986711	0.15538853	1	7138	tags=35%, list=13%, signal=40%
GO_DETERMINATION_OF_ADULT_LIFESPAN	GO_DETERMINATION_OF_ADULT_LIFESPAN		17	0.62706846	1.5553601	0.041353382	0.1555238	1	9048	tags=41%, list=16%, signal=49%
GO_MACROPINOCYTOSIS	GO_MACROPINOCYTOSIS		10	0.6259249	1.5552106	0.046421662	0.15553431	1	13521	tags=60%, list=25%, signal=79%
GO_REGULATION_OF_SALIVA_SECRETION	GO_REGULATION_OF_SALIVA_SECRETION		7	0.77027977	1.5551437	0.017636685	0.1554462	1	3805	tags=57%, list=7%, signal=61%
GO_REGULATION_OF_SPROUTING_ANGIOGENESIS	GO_REGULATION_OF_SPROUTING_ANGIOGENESIS		120	0.40163714	1.5547985	0.030018762	0.15568651	1	11211	tags=34%, list=20%, signal=43%
GO_NEGATIVE_REGULATION_OF_T_CELL_APOPTOTIC_PROCESS	GO_NEGATIVE_REGULATION_OF_T_CELL_APOPTOTIC_PROCESS		21	0.5506619	1.5541562	0.036777582	0.15629476	1	1483	tags=33%, list=3%, signal=34%
GO_NEGATIVE_REGULATION_OF_MAST_CELL_DEGRANULATION	GO_NEGATIVE_REGULATION_OF_MAST_CELL_DEGRANULATION		6	0.7964443	1.5538923	0.033333335	0.15645568	1	2733	tags=67%, list=5%, signal=70%
GO_NEGATIVE_REGULATION_OF_NEUTROPHIL_ACTIVATION	GO_NEGATIVE_REGULATION_OF_NEUTROPHIL_ACTIVATION		5	0.8078838	1.5524938	0.028629856	0.15797459	1	2733	tags=60%, list=5%, signal=63%
GO_POSITIVE_REGULATION_OF_DNA_BINDING_TRANSCRIPTION_FACTOR_ACTIVITY	GO_POSITIVE_REGULATION_OF_DNA_BINDING_TRANSCRIPTION_FACTOR_ACTIVITY		260	0.40867606	1.551424	0.022687608	0.15913045	1	5610	tags=27%, list=10%, signal=30%
GO_BONE_RESORPTION	GO_BONE_RESORPTION		58	0.48523965	1.5510014	0.03683241	0.1594357	1	5587	tags=26%, list=10%, signal=29%
GO_CELLULAR_RESPONSE_TO_INTERFERON_ALPHA	GO_CELLULAR_RESPONSE_TO_INTERFERON_ALPHA		10	0.6683947	1.5508325	0.047186933	0.15947184	1	8682	tags=70%, list=16%, signal=83%
GO_AMMONIUM_ION_METABOLIC_PROCESS	GO_AMMONIUM_ION_METABOLIC_PROCESS		57	0.44795492	1.5506026	0.01675042	0.15957384	1	11400	tags=40%, list=21%, signal=51%
GO_NEGATIVE_REGULATION_OF_OSTEOBLAST_DIFFERENTIATION	GO_NEGATIVE_REGULATION_OF_OSTEOBLAST_DIFFERENTIATION		47	0.49537283	1.5502028	0.032258064	0.15991229	1	8345	tags=34%, list=15%, signal=40%
GO_POSITIVE_REGULATION_OF_SODIUM_ION_TRANSMEMBRANE_TRANSPORTER_ACTIVITY	GO_POSITIVE_REGULATION_OF_SODIUM_ION_TRANSMEMBRANE_TRANSPORTER_ACTIVITY		16	0.6160869	1.5499121	0.046468403	0.16009763	1	10132	tags=63%, list=18%, signal=77%
GO_NEGATIVE_REGULATION_OF_INTERLEUKIN_2_BIOSYNTHETIC_PROCESS	GO_NEGATIVE_REGULATION_OF_INTERLEUKIN_2_BIOSYNTHETIC_PROCESS		5	0.8311055	1.5492197	0.021400778	0.1607685	1	690	tags=60%, list=1%, signal=61%
GO_TROPHECTODERMAL_CELL_DIFFERENTIATION	GO_TROPHECTODERMAL_CELL_DIFFERENTIATION		15	0.5744128	1.549065	0.036363635	0.16077703	1	4450	tags=40%, list=8%, signal=43%
GO_REGULATION_OF_PROTEIN_LOCALIZATION_TO_CELL_CORTEX	GO_REGULATION_OF_PROTEIN_LOCALIZATION_TO_CELL_CORTEX		6	0.76484585	1.5488019	0.03815261	0.16090736	1	6463	tags=50%, list=12%, signal=57%
GO_REGULATION_OF_PHOSPHOLIPASE_C_ACTIVITY	GO_REGULATION_OF_PHOSPHOLIPASE_C_ACTIVITY		44	0.53561085	1.5487646	0.0498155	0.16077268	1	6544	tags=32%, list=12%, signal=36%
GO_EXOCYST_LOCALIZATION	GO_EXOCYST_LOCALIZATION		8	0.6799581	1.5487114	0.035971224	0.16066296	1	9033	tags=50%, list=16%, signal=60%
GO_REGULATION_OF_MACROPHAGE_CHEMOTAXIS	GO_REGULATION_OF_MACROPHAGE_CHEMOTAXIS		25	0.52118593	1.5476874	0.032549728	0.16177557	1	2783	tags=28%, list=5%, signal=29%
GO_PROTEIN_RETENTION_IN_GOLGI_APPARATUS	GO_PROTEIN_RETENTION_IN_GOLGI_APPARATUS		5	0.8714987	1.5474136	0.018329939	0.1619811	1	2550	tags=60%, list=5%, signal=63%
GO_NEGATIVE_REGULATION_OF_TUMOR_NECROSIS_FACTOR_BIOSYNTHETIC_PROCESS	GO_NEGATIVE_REGULATION_OF_TUMOR_NECROSIS_FACTOR_BIOSYNTHETIC_PROCESS		6	0.7672845	1.5472845	0.036166366	0.16196413	1	6122	tags=67%, list=11%, signal=75%
GO_KERATINOCYTE_MIGRATION	GO_KERATINOCYTE_MIGRATION		19	0.6313167	1.5471042	0.057581574	0.16201277	1	4277	tags=42%, list=8%, signal=46%
GO_POSITIVE_REGULATION_OF_IMMUNOGLOBULIN_PRODUCTION	GO_POSITIVE_REGULATION_OF_IMMUNOGLOBULIN_PRODUCTION		43	0.5189665	1.5460283	0.036842104	0.16320774	1	14719	tags=58%, list=27%, signal=79%
GO_REGULATION_OF_MACROPHAGE_APOPTOTIC_PROCESS	GO_REGULATION_OF_MACROPHAGE_APOPTOTIC_PROCESS		9	0.6408269	1.5453625	0.045454547	0.16385879	1	2295	tags=33%, list=4%, signal=35%
GO_NECROPTOTIC_SIGNALING_PATHWAY	GO_NECROPTOTIC_SIGNALING_PATHWAY		6	0.7602772	1.5438805	0.037698414	0.1655154	1	8345	tags=83%, list=15%, signal=98%
GO_DETECTION_OF_EXTERNAL_BIOTIC_STIMULUS	GO_DETECTION_OF_EXTERNAL_BIOTIC_STIMULUS		18	0.59669363	1.5429132	0.054844607	0.16652605	1	6623	tags=50%, list=12%, signal=57%
GO_B_CELL_PROLIFERATION_INVOLVED_IN_IMMUNE_RESPONSE	GO_B_CELL_PROLIFERATION_INVOLVED_IN_IMMUNE_RESPONSE		6	0.8659456	1.5428286	0.02550091	0.16646719	1	6544	tags=83%, list=12%, signal=95%
GO_MDA_5_SIGNALING_PATHWAY	GO_MDA_5_SIGNALING_PATHWAY		10	0.65580606	1.5425667	0.06037736	0.16660678	1	4969	tags=50%, list=9%, signal=55%
GO_PHAGOLYSOSOME_ASSEMBLY	GO_PHAGOLYSOSOME_ASSEMBLY		13	0.5935767	1.5418861	0.032388665	0.16731893	1	3849	tags=46%, list=7%, signal=50%
GO_ARACHIDONIC_ACID_METABOLIC_PROCESS	GO_ARACHIDONIC_ACID_METABOLIC_PROCESS		51	0.48991764	1.5412967	0.018644068	0.16789588	1	11370	tags=41%, list=21%, signal=52%
GO_PROTEIN_AUTOPHOSPHORYLATION	GO_PROTEIN_AUTOPHOSPHORYLATION		233	0.4354335	1.5396179	0.056074765	0.1699841	1	6974	tags=28%, list=13%, signal=32%
GO_CELLULAR_RESPONSE_TO_OXIDISED_LOW_DENSITY_LIPOPROTEIN_PARTICLE_STIMULUS	GO_CELLULAR_RESPONSE_TO_OXIDISED_LOW_DENSITY_LIPOPROTEIN_PARTICLE_STIMULUS		10	0.6519919	1.5384442	0.02819549	0.17133959	1	4255	tags=50%, list=8%, signal=54%
GO_RESPONSE_TO_DOPAMINE	GO_RESPONSE_TO_DOPAMINE		14	0.5956498	1.5374163	0.05075188	0.17246045	1	12981	tags=57%, list=24%, signal=75%
GO_REGULATION_OF_ACUTE_INFLAMMATORY_RESPONSE	GO_REGULATION_OF_ACUTE_INFLAMMATORY_RESPONSE		44	0.5008334	1.5371542	0.0321489	0.1725964	1	8987	tags=45%, list=16%, signal=54%
GO_NEGATIVE_REGULATION_OF_IMMUNOGLOBULIN_PRODUCTION	GO_NEGATIVE_REGULATION_OF_IMMUNOGLOBULIN_PRODUCTION		12	0.64520276	1.5369973	0.037102472	0.17258514	1	1140	tags=33%, list=2%, signal=34%
GO_POSITIVE_REGULATION_OF_MEMBRANE_PROTEIN_ECTODOMAIN_PROTEOLYSIS	GO_POSITIVE_REGULATION_OF_MEMBRANE_PROTEIN_ECTODOMAIN_PROTEOLYSIS		15	0.5912802	1.5366977	0.048417132	0.17282249	1	8856	tags=40%, list=16%, signal=48%
GO_PHOSPHOLIPID_DEPHOSPHORYLATION	GO_PHOSPHOLIPID_DEPHOSPHORYLATION		37	0.5372666	1.5365855	0.050290134	0.17279693	1	6194	tags=38%, list=11%, signal=43%
GO_DNA_CYTOSINE_DEAMINATION	GO_DNA_CYTOSINE_DEAMINATION		9	0.74476606	1.5365598	0.043956045	0.1726491	1	4326	tags=67%, list=8%, signal=72%
GO_REGULATION_OF_HAIR_FOLLICLE_DEVELOPMENT	GO_REGULATION_OF_HAIR_FOLLICLE_DEVELOPMENT		19	0.537124	1.5364933	0.023636363	0.17255272	1	8345	tags=37%, list=15%, signal=43%
GO_RESPONSE_TO_MECHANICAL_STIMULUS	GO_RESPONSE_TO_MECHANICAL_STIMULUS		206	0.40341628	1.5363438	0.030927835	0.17255184	1	6341	tags=25%, list=11%, signal=28%
GO_MHC_CLASS_I_BIOSYNTHETIC_PROCESS	GO_MHC_CLASS_I_BIOSYNTHETIC_PROCESS		6	0.7535647	1.5358994	0.03860294	0.172912	1	2034	tags=33%, list=4%, signal=35%
GO_POSITIVE_REGULATION_OF_NATURAL_KILLER_CELL_ACTIVATION	GO_POSITIVE_REGULATION_OF_NATURAL_KILLER_CELL_ACTIVATION		21	0.56131196	1.5357282	0.054580897	0.17294864	1	4068	tags=33%, list=7%, signal=36%
GO_MYELOID_LEUKOCYTE_MEDIATED_IMMUNITY	GO_MYELOID_LEUKOCYTE_MEDIATED_IMMUNITY		548	0.40190375	1.5349593	0.042990655	0.17376173	1	7459	tags=29%, list=14%, signal=33%
GO_CELLULAR_RESPONSE_TO_ALCOHOL	GO_CELLULAR_RESPONSE_TO_ALCOHOL		89	0.45504206	1.5341053	0.039285716	0.17469947	1	11721	tags=44%, list=21%, signal=56%
GO_NEGATIVE_REGULATION_OF_MAST_CELL_ACTIVATION_INVOLVED_IN_IMMUNE_RESPONSE	GO_NEGATIVE_REGULATION_OF_MAST_CELL_ACTIVATION_INVOLVED_IN_IMMUNE_RESPONSE		8	0.71104425	1.5338941	0.051146384	0.17481923	1	5579	tags=63%, list=10%, signal=70%
GO_POSITIVE_REGULATION_OF_CELLULAR_EXTRAVASATION	GO_POSITIVE_REGULATION_OF_CELLULAR_EXTRAVASATION		14	0.662397	1.5331551	0.065764025	0.17558514	1	4524	tags=50%, list=8%, signal=54%
GO_POSITIVE_REGULATION_OF_CELL_POPULATION_PROLIFERATION	GO_POSITIVE_REGULATION_OF_CELL_POPULATION_PROLIFERATION		956	0.38021863	1.5328832	0.01880342	0.17576483	1	6358	tags=24%, list=12%, signal=27%
GO_POSITIVE_REGULATION_OF_TOLL_LIKE_RECEPTOR_2_SIGNALING_PATHWAY	GO_POSITIVE_REGULATION_OF_TOLL_LIKE_RECEPTOR_2_SIGNALING_PATHWAY		6	0.7157129	1.5323702	0.06187625	0.1762493	1	15091	tags=67%, list=27%, signal=92%
GO_PHOSPHOLIPID_METABOLIC_PROCESS	GO_PHOSPHOLIPID_METABOLIC_PROCESS		253	0.4051091	1.5322267	0.02578269	0.1762245	1	6967	tags=27%, list=13%, signal=31%
GO_REGULATION_OF_MONONUCLEAR_CELL_MIGRATION	GO_REGULATION_OF_MONONUCLEAR_CELL_MIGRATION		43	0.5074362	1.5317516	0.062730625	0.17668006	1	8808	tags=40%, list=16%, signal=47%
GO_ANTIGEN_PROCESSING_AND_PRESENTATION_VIA_MHC_CLASS_IB	GO_ANTIGEN_PROCESSING_AND_PRESENTATION_VIA_MHC_CLASS_IB		16	0.6735811	1.5310758	0.06706114	0.17736442	1	9766	tags=63%, list=18%, signal=76%
GO_ATRIOVENTRICULAR_VALVE_FORMATION	GO_ATRIOVENTRICULAR_VALVE_FORMATION		7	0.7379456	1.5308152	0.057943925	0.1775278	1	4895	tags=57%, list=9%, signal=63%
GO_NEGATIVE_REGULATION_OF_EXCITATORY_POSTSYNAPTIC_POTENTIAL	GO_NEGATIVE_REGULATION_OF_EXCITATORY_POSTSYNAPTIC_POTENTIAL		11	0.6126889	1.5307337	0.032629557	0.17745066	1	8484	tags=55%, list=15%, signal=64%
GO_REGULATION_OF_HYDROGEN_PEROXIDE_BIOSYNTHETIC_PROCESS	GO_REGULATION_OF_HYDROGEN_PEROXIDE_BIOSYNTHETIC_PROCESS		9	0.6104488	1.5305423	0.040697675	0.17750482	1	1462	tags=33%, list=3%, signal=34%
GO_POSITIVE_REGULATION_OF_MHC_CLASS_II_BIOSYNTHETIC_PROCESS	GO_POSITIVE_REGULATION_OF_MHC_CLASS_II_BIOSYNTHETIC_PROCESS		7	0.7665302	1.5298753	0.029684601	0.17815498	1	6122	tags=43%, list=11%, signal=48%
GO_RESPONSE_TO_DSRNA	GO_RESPONSE_TO_DSRNA		54	0.43175164	1.5293016	0.04863813	0.17869644	1	10649	tags=39%, list=19%, signal=48%
GO_PLATELET_ACTIVATION	GO_PLATELET_ACTIVATION		153	0.44271746	1.5288215	0.055555556	0.17918351	1	5012	tags=26%, list=9%, signal=29%
GO_MACROPHAGE_CHEMOTAXIS	GO_MACROPHAGE_CHEMOTAXIS		36	0.49724692	1.5285709	0.029250458	0.17934598	1	3935	tags=28%, list=7%, signal=30%
GO_NEGATIVE_REGULATION_OF_MACROPHAGE_APOPTOTIC_PROCESS	GO_NEGATIVE_REGULATION_OF_MACROPHAGE_APOPTOTIC_PROCESS		5	0.75417304	1.5285213	0.03499079	0.1792428	1	2295	tags=60%, list=4%, signal=63%
GO_COMPLEMENT_RECEPTOR_MEDIATED_SIGNALING_PATHWAY	GO_COMPLEMENT_RECEPTOR_MEDIATED_SIGNALING_PATHWAY		13	0.69335985	1.5283992	0.060606062	0.17919062	1	13573	tags=85%, list=25%, signal=112%
GO_CD4_POSITIVE_ALPHA_BETA_T_CELL_CYTOKINE_PRODUCTION	GO_CD4_POSITIVE_ALPHA_BETA_T_CELL_CYTOKINE_PRODUCTION		20	0.58503354	1.5281652	0.03539823	0.1793174	1	6358	tags=40%, list=12%, signal=45%
GO_MHC_CLASS_II_BIOSYNTHETIC_PROCESS	GO_MHC_CLASS_II_BIOSYNTHETIC_PROCESS		12	0.6447982	1.528098	0.042477876	0.17921717	1	6122	tags=42%, list=11%, signal=47%
GO_SMOOTH_MUSCLE_CELL_APOPTOTIC_PROCESS	GO_SMOOTH_MUSCLE_CELL_APOPTOTIC_PROCESS		29	0.4939022	1.5280737	0.04411765	0.17905726	1	10863	tags=45%, list=20%, signal=56%
GO_PHOSPHATIDYLCHOLINE_ACYL_CHAIN_REMODELING	GO_PHOSPHATIDYLCHOLINE_ACYL_CHAIN_REMODELING		26	0.4993166	1.5278343	0.029360967	0.17919783	1	6859	tags=38%, list=12%, signal=44%
GO_REGULATION_OF_EPITHELIAL_CELL_DIFFERENTIATION	GO_REGULATION_OF_EPITHELIAL_CELL_DIFFERENTIATION		147	0.39090833	1.5276811	0.030050084	0.17921738	1	14937	tags=42%, list=27%, signal=58%
GO_NEGATIVE_REGULATION_OF_PANCREATIC_JUICE_SECRETION	GO_NEGATIVE_REGULATION_OF_PANCREATIC_JUICE_SECRETION		5	0.745043	1.5276587	0.047058824	0.17906213	1	9631	tags=80%, list=17%, signal=97%
GO_NUCLEAR_TRANSCRIBED_MRNA_CATABOLIC_PROCESS_DEADENYLATION_INDEPENDENT_DECAY	GO_NUCLEAR_TRANSCRIBED_MRNA_CATABOLIC_PROCESS_DEADENYLATION_INDEPENDENT_DECAY		7	0.7560753	1.5274508	0.032193158	0.17915662	1	9758	tags=57%, list=18%, signal=69%
GO_TOLL_LIKE_RECEPTOR_7_SIGNALING_PATHWAY	GO_TOLL_LIKE_RECEPTOR_7_SIGNALING_PATHWAY		7	0.79158217	1.527259	0.027237354	0.17923334	1	4953	tags=71%, list=9%, signal=78%
GO_TERPENOID_BIOSYNTHETIC_PROCESS	GO_TERPENOID_BIOSYNTHETIC_PROCESS		10	0.66664314	1.5267451	0.03652174	0.1797288	1	9729	tags=50%, list=18%, signal=61%
GO_EPITHELIAL_CELL_DIFFERENTIATION	GO_EPITHELIAL_CELL_DIFFERENTIATION		759	0.36094427	1.5263978	0.006279435	0.1800321	1	8497	tags=28%, list=15%, signal=32%
GO_POSITIVE_REGULATION_OF_CHEMOKINE_C_C_MOTIF_LIGAND_5_PRODUCTION	GO_POSITIVE_REGULATION_OF_CHEMOKINE_C_C_MOTIF_LIGAND_5_PRODUCTION		5	0.7913885	1.526055	0.028957529	0.18031082	1	8214	tags=80%, list=15%, signal=94%
GO_TRANSPOSITION	GO_TRANSPOSITION		28	0.5559498	1.5258002	0.04695652	0.18048821	1	7101	tags=36%, list=13%, signal=41%
GO_THYMUS_DEVELOPMENT	GO_THYMUS_DEVELOPMENT		46	0.4863257	1.5250354	0.041894354	0.18129268	1	8497	tags=43%, list=15%, signal=51%
GO_TYPE_I_INTERFERON_SECRETION	GO_TYPE_I_INTERFERON_SECRETION		10	0.64848393	1.524869	0.05893186	0.18134937	1	2214	tags=30%, list=4%, signal=31%
GO_POSITIVE_REGULATION_OF_T_CELL_CYTOKINE_PRODUCTION	GO_POSITIVE_REGULATION_OF_T_CELL_CYTOKINE_PRODUCTION		18	0.57573634	1.524551	0.059813086	0.18152793	1	9187	tags=44%, list=17%, signal=53%
GO_POSITIVE_REGULATION_OF_LEUKOCYTE_ADHESION_TO_VASCULAR_ENDOTHELIAL_CELL	GO_POSITIVE_REGULATION_OF_LEUKOCYTE_ADHESION_TO_VASCULAR_ENDOTHELIAL_CELL		12	0.6693232	1.5244657	0.058708414	0.18148068	1	10108	tags=58%, list=18%, signal=71%
GO_REGULATION_OF_VASCULOGENESIS	GO_REGULATION_OF_VASCULOGENESIS		14	0.615982	1.5243205	0.05313093	0.18149054	1	12830	tags=57%, list=23%, signal=74%
GO_REGULATION_OF_VASCULAR_PERMEABILITY	GO_REGULATION_OF_VASCULAR_PERMEABILITY		33	0.51014894	1.5239241	0.046153847	0.18184228	1	8987	tags=39%, list=16%, signal=47%
GO_HEPOXILIN_BIOSYNTHETIC_PROCESS	GO_HEPOXILIN_BIOSYNTHETIC_PROCESS		5	0.8701822	1.5237646	0.018416205	0.18185082	1	5012	tags=60%, list=9%, signal=66%
GO_RESPONSE_TO_TUMOR_NECROSIS_FACTOR	GO_RESPONSE_TO_TUMOR_NECROSIS_FACTOR		304	0.3948051	1.5229416	0.023140496	0.18276785	1	8001	tags=31%, list=14%, signal=36%
GO_CELLULAR_RESPONSE_TO_LIPID	GO_CELLULAR_RESPONSE_TO_LIPID		600	0.38988277	1.5227554	0.029310346	0.18283112	1	10716	tags=34%, list=19%, signal=41%
GO_REGULATION_OF_ARP2_3_COMPLEX_MEDIATED_ACTIN_NUCLEATION	GO_REGULATION_OF_ARP2_3_COMPLEX_MEDIATED_ACTIN_NUCLEATION		16	0.5468449	1.5227134	0.03731343	0.18269406	1	4980	tags=31%, list=9%, signal=34%
GO_REGULATION_OF_TUMOR_NECROSIS_FACTOR_MEDIATED_SIGNALING_PATHWAY	GO_REGULATION_OF_TUMOR_NECROSIS_FACTOR_MEDIATED_SIGNALING_PATHWAY		59	0.4420936	1.5225496	0.030927835	0.1827376	1	6562	tags=32%, list=12%, signal=37%
GO_EMBRYONIC_CAMERA_TYPE_EYE_DEVELOPMENT	GO_EMBRYONIC_CAMERA_TYPE_EYE_DEVELOPMENT		37	0.53968644	1.5224465	0.044169612	0.18268919	1	9187	tags=41%, list=17%, signal=49%
GO_RENAL_WATER_TRANSPORT	GO_RENAL_WATER_TRANSPORT		6	0.7534186	1.5222163	0.043809526	0.18282096	1	6715	tags=50%, list=12%, signal=57%
GO_REGULATION_OF_GLYCOPROTEIN_BIOSYNTHETIC_PROCESS	GO_REGULATION_OF_GLYCOPROTEIN_BIOSYNTHETIC_PROCESS		39	0.49099135	1.522068	0.046428572	0.18284218	1	6997	tags=33%, list=13%, signal=38%
GO_P38MAPK_CASCADE	GO_P38MAPK_CASCADE		51	0.46180752	1.5219979	0.035650622	0.18274395	1	7932	tags=35%, list=14%, signal=41%
GO_ENUCLEATE_ERYTHROCYTE_DIFFERENTIATION	GO_ENUCLEATE_ERYTHROCYTE_DIFFERENTIATION		8	0.66691726	1.5219649	0.06751825	0.18260203	1	10008	tags=50%, list=18%, signal=61%
GO_REGULATION_OF_RESPONSE_TO_REACTIVE_OXYGEN_SPECIES	GO_REGULATION_OF_RESPONSE_TO_REACTIVE_OXYGEN_SPECIES		34	0.47306344	1.5214715	0.03364486	0.18310581	1	8566	tags=47%, list=16%, signal=56%
GO_RAC_PROTEIN_SIGNAL_TRANSDUCTION	GO_RAC_PROTEIN_SIGNAL_TRANSDUCTION		33	0.5020639	1.5214044	0.060721062	0.18302321	1	10592	tags=45%, list=19%, signal=56%
GO_POSITIVE_REGULATION_OF_FC_GAMMA_RECEPTOR_SIGNALING_PATHWAY_INVOLVED_IN_PHAGOCYTOSIS	GO_POSITIVE_REGULATION_OF_FC_GAMMA_RECEPTOR_SIGNALING_PATHWAY_INVOLVED_IN_PHAGOCYTOSIS		5	0.8478415	1.5202641	0.028169014	0.18433274	1	4162	tags=60%, list=8%, signal=65%
GO_POSITIVE_REGULATION_OF_MONOCYTE_CHEMOTAXIS	GO_POSITIVE_REGULATION_OF_MONOCYTE_CHEMOTAXIS		18	0.5919307	1.5202408	0.06851852	0.18417133	1	1675	tags=33%, list=3%, signal=34%
GO_ACTIVATION_OF_JUN_KINASE_ACTIVITY	GO_ACTIVATION_OF_JUN_KINASE_ACTIVITY		39	0.4945127	1.5202067	0.050847456	0.18402639	1	5418	tags=28%, list=10%, signal=31%
GO_MUSCLE_CELL_PROLIFERATION	GO_MUSCLE_CELL_PROLIFERATION		224	0.4104785	1.5201887	0.028021015	0.18386634	1	11340	tags=34%, list=21%, signal=43%
GO_REGULATION_OF_CHLORIDE_TRANSPORT	GO_REGULATION_OF_CHLORIDE_TRANSPORT		10	0.60881007	1.5194218	0.033088237	0.18471615	1	6318	tags=40%, list=11%, signal=45%
GO_PYRIMIDINE_RIBONUCLEOSIDE_CATABOLIC_PROCESS	GO_PYRIMIDINE_RIBONUCLEOSIDE_CATABOLIC_PROCESS		13	0.6477563	1.5192642	0.05882353	0.18475895	1	4326	tags=46%, list=8%, signal=50%
GO_EMBRYONIC_CAMERA_TYPE_EYE_MORPHOGENESIS	GO_EMBRYONIC_CAMERA_TYPE_EYE_MORPHOGENESIS		26	0.57469374	1.5187303	0.042955328	0.18529807	1	9187	tags=38%, list=17%, signal=46%
GO_SPLEEN_DEVELOPMENT	GO_SPLEEN_DEVELOPMENT		34	0.50740737	1.5186772	0.04587156	0.18518414	1	6544	tags=41%, list=12%, signal=47%
GO_RHYTHMIC_BEHAVIOR	GO_RHYTHMIC_BEHAVIOR		43	0.4993428	1.5174264	0.032040473	0.18665664	1	4467	tags=33%, list=8%, signal=35%
GO_ACTIVATION_OF_MAPKK_ACTIVITY	GO_ACTIVATION_OF_MAPKK_ACTIVITY		54	0.4901268	1.5173692	0.048780486	0.1865415	1	6693	tags=30%, list=12%, signal=34%
GO_NEGATIVE_REGULATION_OF_VIRAL_TRANSCRIPTION	GO_NEGATIVE_REGULATION_OF_VIRAL_TRANSCRIPTION		24	0.520327	1.5169722	0.036190476	0.18693018	1	10069	tags=42%, list=18%, signal=51%
GO_CELLULAR_RESPONSE_TO_MORPHINE	GO_CELLULAR_RESPONSE_TO_MORPHINE		5	0.78041744	1.5164208	0.027303753	0.18750113	1	12121	tags=100%, list=22%, signal=128%
GO_NEGATIVE_REGULATION_OF_INTERLEUKIN_1_SECRETION	GO_NEGATIVE_REGULATION_OF_INTERLEUKIN_1_SECRETION		15	0.5666772	1.5158899	0.04770017	0.18805699	1	8092	tags=40%, list=15%, signal=47%
GO_REGULATION_OF_NUCLEOTIDE_BINDING_OLIGOMERIZATION_DOMAIN_CONTAINING_SIGNALING_PATHWAY	GO_REGULATION_OF_NUCLEOTIDE_BINDING_OLIGOMERIZATION_DOMAIN_CONTAINING_SIGNALING_PATHWAY		9	0.71418154	1.5151579	0.053703703	0.18884397	1	6562	tags=56%, list=12%, signal=63%
GO_NEUTROPHIL_CLEARANCE	GO_NEUTROPHIL_CLEARANCE		5	0.7679859	1.514144	0.032136105	0.18999463	1	4301	tags=60%, list=8%, signal=65%
GO_CARNITINE_BIOSYNTHETIC_PROCESS	GO_CARNITINE_BIOSYNTHETIC_PROCESS		5	0.78346854	1.5140928	0.03868472	0.18988836	1	5394	tags=60%, list=10%, signal=66%
GO_POSITIVE_REGULATION_OF_CD8_POSITIVE_ALPHA_BETA_T_CELL_ACTIVATION	GO_POSITIVE_REGULATION_OF_CD8_POSITIVE_ALPHA_BETA_T_CELL_ACTIVATION		6	0.7291208	1.513977	0.06521739	0.18986587	1	7459	tags=50%, list=14%, signal=58%
GO_RESPONSE_TO_INTERLEUKIN_18	GO_RESPONSE_TO_INTERLEUKIN_18		11	0.63502026	1.5133885	0.030534351	0.1905223	1	4683	tags=55%, list=8%, signal=60%
GO_INTERFERON_BETA_SECRETION	GO_INTERFERON_BETA_SECRETION		5	0.7985274	1.5129982	0.043392505	0.19083655	1	2214	tags=60%, list=4%, signal=63%
GO_IMMUNOGLOBULIN_SECRETION	GO_IMMUNOGLOBULIN_SECRETION		21	0.57927936	1.5129783	0.056140352	0.19067018	1	8822	tags=48%, list=16%, signal=57%
GO_POSITIVE_REGULATION_OF_T_HELPER_1_CELL_DIFFERENTIATION	GO_POSITIVE_REGULATION_OF_T_HELPER_1_CELL_DIFFERENTIATION		6	0.75079304	1.5122994	0.04472272	0.191406	1	8064	tags=67%, list=15%, signal=78%
GO_SOMATIC_RECOMBINATION_OF_IMMUNOGLOBULIN_GENE_SEGMENTS	GO_SOMATIC_RECOMBINATION_OF_IMMUNOGLOBULIN_GENE_SEGMENTS		50	0.52097523	1.5121981	0.06215722	0.19134712	1	6256	tags=32%, list=11%, signal=36%
GO_POSITIVE_REGULATION_OF_CYTOLYSIS	GO_POSITIVE_REGULATION_OF_CYTOLYSIS		11	0.6738385	1.5115969	0.03814262	0.19196355	1	8856	tags=45%, list=16%, signal=54%
GO_REGULATION_OF_PROTEIN_ADP_RIBOSYLATION	GO_REGULATION_OF_PROTEIN_ADP_RIBOSYLATION		9	0.6903132	1.5115176	0.045627378	0.19187778	1	3634	tags=44%, list=7%, signal=48%
GO_REGULATION_OF_MIRNA_METABOLIC_PROCESS	GO_REGULATION_OF_MIRNA_METABOLIC_PROCESS		7	0.7099282	1.5111783	0.037698414	0.19210555	1	5786	tags=43%, list=10%, signal=48%
GO_RESPONSE_TO_LAMINAR_FLUID_SHEAR_STRESS	GO_RESPONSE_TO_LAMINAR_FLUID_SHEAR_STRESS		14	0.60454005	1.5110145	0.06746032	0.19213665	1	12478	tags=57%, list=23%, signal=74%
GO_ACTIVATION_OF_PROTEIN_KINASE_A_ACTIVITY	GO_ACTIVATION_OF_PROTEIN_KINASE_A_ACTIVITY		18	0.58898616	1.5100093	0.04710145	0.19335972	1	13691	tags=56%, list=25%, signal=74%
GO_NEGATIVE_REGULATION_OF_INTERLEUKIN_5_PRODUCTION	GO_NEGATIVE_REGULATION_OF_INTERLEUKIN_5_PRODUCTION		7	0.69723624	1.5091342	0.036842104	0.19442485	1	6136	tags=57%, list=11%, signal=64%
GO_MUSCLE_CELL_APOPTOTIC_PROCESS	GO_MUSCLE_CELL_APOPTOTIC_PROCESS		81	0.40755188	1.5079796	0.035781544	0.19579944	1	8873	tags=33%, list=16%, signal=40%
GO_NEGATIVE_REGULATION_OF_GLIAL_CELL_PROLIFERATION	GO_NEGATIVE_REGULATION_OF_GLIAL_CELL_PROLIFERATION		15	0.5746805	1.5063577	0.048561152	0.19793576	1	3925	tags=27%, list=7%, signal=29%
GO_REGULATION_OF_MEMBRANE_INVAGINATION	GO_REGULATION_OF_MEMBRANE_INVAGINATION		15	0.6034426	1.5056099	0.079245284	0.19887851	1	6692	tags=40%, list=12%, signal=46%
GO_NEGATIVE_REGULATION_OF_P38MAPK_CASCADE	GO_NEGATIVE_REGULATION_OF_P38MAPK_CASCADE		8	0.6801933	1.5051591	0.045544554	0.19935133	1	6156	tags=38%, list=11%, signal=42%
GO_NEGATIVE_REGULATION_OF_MYELOID_LEUKOCYTE_DIFFERENTIATION	GO_NEGATIVE_REGULATION_OF_MYELOID_LEUKOCYTE_DIFFERENTIATION		49	0.46163064	1.5046954	0.042402826	0.19978586	1	4255	tags=29%, list=8%, signal=31%
GO_POSITIVE_REGULATION_OF_ENDOTHELIAL_CELL_DIFFERENTIATION	GO_POSITIVE_REGULATION_OF_ENDOTHELIAL_CELL_DIFFERENTIATION		22	0.55847245	1.5042154	0.05860806	0.20030354	1	14684	tags=55%, list=27%, signal=74%
GO_POSITIVE_REGULATION_OF_ACUTE_INFLAMMATORY_RESPONSE	GO_POSITIVE_REGULATION_OF_ACUTE_INFLAMMATORY_RESPONSE		29	0.54205793	1.5031157	0.06239168	0.20172645	1	8987	tags=52%, list=16%, signal=62%
GO_PHOSPHATIDYLSERINE_ACYL_CHAIN_REMODELING	GO_PHOSPHATIDYLSERINE_ACYL_CHAIN_REMODELING		20	0.5293704	1.5018327	0.05945946	0.2034376	1	5449	tags=40%, list=10%, signal=44%
GO_RESPONSE_TO_PH	GO_RESPONSE_TO_PH		39	0.4703193	1.5018101	0.036395147	0.20326473	1	8856	tags=36%, list=16%, signal=43%
GO_PSEUDOPODIUM_ORGANIZATION	GO_PSEUDOPODIUM_ORGANIZATION		17	0.52365595	1.501768	0.052083332	0.20312767	1	8807	tags=47%, list=16%, signal=56%
GO_POSITIVE_REGULATION_OF_VASCULOGENESIS	GO_POSITIVE_REGULATION_OF_VASCULOGENESIS		10	0.67111224	1.5008405	0.06640625	0.20424531	1	10560	tags=60%, list=19%, signal=74%
GO_REGULATION_OF_SECRETION	GO_REGULATION_OF_SECRETION		781	0.3746562	1.4999496	0.02306425	0.20530817	1	8961	tags=29%, list=16%, signal=34%
GO_POSITIVE_REGULATION_OF_ARP2_3_COMPLEX_MEDIATED_ACTIN_NUCLEATION	GO_POSITIVE_REGULATION_OF_ARP2_3_COMPLEX_MEDIATED_ACTIN_NUCLEATION		8	0.6609071	1.4999458	0.05313093	0.20511042	1	3770	tags=38%, list=7%, signal=40%
GO_RIG_I_SIGNALING_PATHWAY	GO_RIG_I_SIGNALING_PATHWAY		20	0.5185922	1.4995335	0.040852576	0.20552441	1	6562	tags=40%, list=12%, signal=45%
GO_REGULATION_OF_SYSTEMIC_ARTERIAL_BLOOD_PRESSURE_BY_CIRCULATORY_RENIN_ANGIOTENSIN	GO_REGULATION_OF_SYSTEMIC_ARTERIAL_BLOOD_PRESSURE_BY_CIRCULATORY_RENIN_ANGIOTENSIN		18	0.6198723	1.4994193	0.091078065	0.2054875	1	1630	tags=28%, list=3%, signal=29%
GO_TEMPERATURE_HOMEOSTASIS	GO_TEMPERATURE_HOMEOSTASIS		173	0.41213137	1.4992523	0.03652174	0.20551862	1	7980	tags=31%, list=14%, signal=36%
GO_INNER_EAR_AUDITORY_RECEPTOR_CELL_DIFFERENTIATION	GO_INNER_EAR_AUDITORY_RECEPTOR_CELL_DIFFERENTIATION		31	0.47784707	1.4992199	0.0411449	0.20536052	1	11400	tags=42%, list=21%, signal=53%
GO_B_CELL_LINEAGE_COMMITMENT	GO_B_CELL_LINEAGE_COMMITMENT		5	0.7711193	1.4991039	0.035433073	0.20534322	1	6256	tags=60%, list=11%, signal=68%
GO_INTERFERON_ALPHA_BIOSYNTHETIC_PROCESS	GO_INTERFERON_ALPHA_BIOSYNTHETIC_PROCESS		6	0.8185245	1.4990082	0.036217302	0.20527312	1	10019	tags=100%, list=18%, signal=122%
GO_RESPONSE_TO_FUNGICIDE	GO_RESPONSE_TO_FUNGICIDE		11	0.6148829	1.4980655	0.06333973	0.20633087	1	4467	tags=45%, list=8%, signal=49%
GO_ACTIVATION_OF_GTPASE_ACTIVITY	GO_ACTIVATION_OF_GTPASE_ACTIVITY		93	0.43168256	1.4980114	0.060491495	0.20620571	1	13628	tags=40%, list=25%, signal=53%
GO_REGULATION_OF_KERATINOCYTE_MIGRATION	GO_REGULATION_OF_KERATINOCYTE_MIGRATION		14	0.63913614	1.497919	0.06963249	0.20613246	1	4277	tags=43%, list=8%, signal=46%
GO_NEGATIVE_REGULATION_OF_EPITHELIAL_CELL_DIFFERENTIATION	GO_NEGATIVE_REGULATION_OF_EPITHELIAL_CELL_DIFFERENTIATION		42	0.44020772	1.4967854	0.031634446	0.20755857	1	3693	tags=24%, list=7%, signal=25%
GO_INTERLEUKIN_4_SECRETION	GO_INTERLEUKIN_4_SECRETION		6	0.72627217	1.4967278	0.056880735	0.2074537	1	8497	tags=67%, list=15%, signal=79%
GO_NEGATIVE_REGULATION_OF_RELAXATION_OF_MUSCLE	GO_NEGATIVE_REGULATION_OF_RELAXATION_OF_MUSCLE		5	0.81952417	1.496639	0.024475524	0.20738785	1	5891	tags=60%, list=11%, signal=67%
GO_RENAL_FILTRATION	GO_RENAL_FILTRATION		21	0.61427915	1.4962332	0.08349901	0.20777886	1	4635	tags=38%, list=8%, signal=42%
GO_DIVALENT_INORGANIC_CATION_HOMEOSTASIS	GO_DIVALENT_INORGANIC_CATION_HOMEOSTASIS		505	0.39040375	1.4961544	0.045677	0.20768917	1	6859	tags=26%, list=12%, signal=29%
GO_NEGATIVE_REGULATION_OF_LIPOPOLYSACCHARIDE_MEDIATED_SIGNALING_PATHWAY	GO_NEGATIVE_REGULATION_OF_LIPOPOLYSACCHARIDE_MEDIATED_SIGNALING_PATHWAY		13	0.6160175	1.4961241	0.054481547	0.20754169	1	14021	tags=69%, list=25%, signal=93%
GO_MACROPHAGE_APOPTOTIC_PROCESS	GO_MACROPHAGE_APOPTOTIC_PROCESS		11	0.59505457	1.4955477	0.0502693	0.20824459	1	2295	tags=27%, list=4%, signal=28%
GO_CRANIAL_NERVE_FORMATION	GO_CRANIAL_NERVE_FORMATION		8	0.6802096	1.4955268	0.045602605	0.208071	1	7805	tags=63%, list=14%, signal=73%
GO_MAMMARY_GLAND_MORPHOGENESIS	GO_MAMMARY_GLAND_MORPHOGENESIS		45	0.47204354	1.4953405	0.054446463	0.20813045	1	10621	tags=42%, list=19%, signal=52%
GO_REGULATION_OF_MAPK_CASCADE	GO_REGULATION_OF_MAPK_CASCADE		747	0.37596065	1.4952617	0.037414964	0.20805265	1	9327	tags=31%, list=17%, signal=36%
GO_PROSTATE_GLAND_DEVELOPMENT	GO_PROSTATE_GLAND_DEVELOPMENT		47	0.47150436	1.4951576	0.055357143	0.20801306	1	10488	tags=43%, list=19%, signal=52%
GO_CHEMOKINE_C_C_MOTIF_LIGAND_2_SECRETION	GO_CHEMOKINE_C_C_MOTIF_LIGAND_2_SECRETION		6	0.74093676	1.4942524	0.0729783	0.20914844	1	3924	tags=50%, list=7%, signal=54%
GO_RESPONSE_TO_ATP	GO_RESPONSE_TO_ATP		32	0.47771052	1.4939183	0.0321489	0.209432	1	4662	tags=28%, list=8%, signal=31%
GO_POSITIVE_REGULATION_OF_BMP_SIGNALING_PATHWAY	GO_POSITIVE_REGULATION_OF_BMP_SIGNALING_PATHWAY		32	0.51922363	1.493813	0.055267703	0.209373	1	7523	tags=34%, list=14%, signal=40%
GO_NEGATIVE_REGULATION_OF_COLLAGEN_BIOSYNTHETIC_PROCESS	GO_NEGATIVE_REGULATION_OF_COLLAGEN_BIOSYNTHETIC_PROCESS		12	0.56924045	1.4935173	0.056261342	0.20958276	1	224	tags=8%, list=0%, signal=8%
GO_POSITIVE_REGULATION_OF_MACROPHAGE_CHEMOTAXIS	GO_POSITIVE_REGULATION_OF_MACROPHAGE_CHEMOTAXIS		14	0.5792733	1.4934454	0.0707635	0.20947987	1	13573	tags=57%, list=25%, signal=76%
GO_NEGATIVE_REGULATION_OF_SINGLE_STRANDED_VIRAL_RNA_REPLICATION_VIA_DOUBLE_STRANDED_DNA_INTERMEDIATE	GO_NEGATIVE_REGULATION_OF_SINGLE_STRANDED_VIRAL_RNA_REPLICATION_VIA_DOUBLE_STRANDED_DNA_INTERMEDIATE		14	0.6510744	1.4932008	0.05380334	0.20964281	1	4326	tags=50%, list=8%, signal=54%
GO_POLYOL_METABOLIC_PROCESS	GO_POLYOL_METABOLIC_PROCESS		69	0.41408816	1.4928064	0.025316456	0.21002638	1	4405	tags=22%, list=8%, signal=24%
GO_PHOSPHATIDYLGLYCEROL_ACYL_CHAIN_REMODELING	GO_PHOSPHATIDYLGLYCEROL_ACYL_CHAIN_REMODELING		18	0.51610553	1.492713	0.037162162	0.209954	1	5449	tags=39%, list=10%, signal=43%
GO_FLUID_TRANSPORT	GO_FLUID_TRANSPORT		26	0.50966173	1.4922903	0.044925123	0.21039207	1	11921	tags=46%, list=22%, signal=59%
GO_NEGATIVE_REGULATION_OF_INTRACELLULAR_STEROID_HORMONE_RECEPTOR_SIGNALING_PATHWAY	GO_NEGATIVE_REGULATION_OF_INTRACELLULAR_STEROID_HORMONE_RECEPTOR_SIGNALING_PATHWAY		35	0.5272705	1.492262	0.07436399	0.21022771	1	10633	tags=46%, list=19%, signal=57%
GO_EPITHELIAL_FLUID_TRANSPORT	GO_EPITHELIAL_FLUID_TRANSPORT		8	0.6827343	1.4918507	0.066287875	0.21062267	1	6318	tags=63%, list=11%, signal=71%
GO_NEGATIVE_REGULATION_OF_CYTOKINE_PRODUCTION_INVOLVED_IN_INFLAMMATORY_RESPONSE	GO_NEGATIVE_REGULATION_OF_CYTOKINE_PRODUCTION_INVOLVED_IN_INFLAMMATORY_RESPONSE		21	0.48958266	1.491843	0.05513308	0.21043307	1	7624	tags=33%, list=14%, signal=39%
GO_NUCLEAR_TRANSCRIBED_MRNA_POLY_A_TAIL_SHORTENING	GO_NUCLEAR_TRANSCRIBED_MRNA_POLY_A_TAIL_SHORTENING		35	0.53021264	1.491781	0.08414873	0.21032351	1	6374	tags=40%, list=12%, signal=45%
GO_DOUBLE_STRAND_BREAK_REPAIR_VIA_SINGLE_STRAND_ANNEALING	GO_DOUBLE_STRAND_BREAK_REPAIR_VIA_SINGLE_STRAND_ANNEALING		8	0.72303724	1.4910243	0.040366974	0.21117584	1	12282	tags=63%, list=22%, signal=80%
GO_PERICARDIUM_MORPHOGENESIS	GO_PERICARDIUM_MORPHOGENESIS		9	0.65994036	1.4909223	0.050847456	0.21112421	1	13660	tags=67%, list=25%, signal=89%
GO_PYRIMIDINE_CONTAINING_COMPOUND_CATABOLIC_PROCESS	GO_PYRIMIDINE_CONTAINING_COMPOUND_CATABOLIC_PROCESS		39	0.4819734	1.4904115	0.05595668	0.21169654	1	5589	tags=31%, list=10%, signal=34%
GO_REGULATION_OF_UNSATURATED_FATTY_ACID_BIOSYNTHETIC_PROCESS	GO_REGULATION_OF_UNSATURATED_FATTY_ACID_BIOSYNTHETIC_PROCESS		9	0.6034431	1.4902058	0.046554934	0.21176389	1	2203	tags=33%, list=4%, signal=35%
GO_INTEGRIN_ACTIVATION	GO_INTEGRIN_ACTIVATION		22	0.57318205	1.4898934	0.08303249	0.21200089	1	4872	tags=36%, list=9%, signal=40%
GO_KERATINOCYTE_DEVELOPMENT	GO_KERATINOCYTE_DEVELOPMENT		12	0.6014881	1.4897792	0.06831119	0.21197863	1	5088	tags=33%, list=9%, signal=37%
GO_NEUROTRANSMITTER_METABOLIC_PROCESS	GO_NEUROTRANSMITTER_METABOLIC_PROCESS		132	0.4079815	1.4888829	0.031666666	0.21304397	1	8601	tags=35%, list=16%, signal=41%
GO_NEGATIVE_REGULATION_OF_B_CELL_MEDIATED_IMMUNITY	GO_NEGATIVE_REGULATION_OF_B_CELL_MEDIATED_IMMUNITY		11	0.6463847	1.4886657	0.04847397	0.2131897	1	1551	tags=36%, list=3%, signal=37%
GO_RESPONSE_TO_LIPID	GO_RESPONSE_TO_LIPID		914	0.37007868	1.4885573	0.03820598	0.21315184	1	10659	tags=32%, list=19%, signal=39%
GO_SMOOTH_MUSCLE_CELL_PROLIFERATION	GO_SMOOTH_MUSCLE_CELL_PROLIFERATION		158	0.40839255	1.4882739	0.049557522	0.2133772	1	10182	tags=30%, list=18%, signal=37%
GO_ANTIBACTERIAL_HUMORAL_RESPONSE	GO_ANTIBACTERIAL_HUMORAL_RESPONSE		46	0.4955399	1.4881816	0.05305466	0.21331948	1	7459	tags=35%, list=14%, signal=40%
GO_NEGATIVE_REGULATION_OF_MULTICELLULAR_ORGANISMAL_PROCESS	GO_NEGATIVE_REGULATION_OF_MULTICELLULAR_ORGANISMAL_PROCESS		1248	0.3659125	1.4877461	0.03407155	0.21374089	1	8625	tags=27%, list=16%, signal=32%
GO_OPTIC_CUP_MORPHOGENESIS_INVOLVED_IN_CAMERA_TYPE_EYE_DEVELOPMENT	GO_OPTIC_CUP_MORPHOGENESIS_INVOLVED_IN_CAMERA_TYPE_EYE_DEVELOPMENT		8	0.685795	1.486617	0.0685413	0.21518248	1	7805	tags=50%, list=14%, signal=58%
GO_REGULATION_OF_NUCLEAR_TRANSCRIBED_MRNA_POLY_A_TAIL_SHORTENING	GO_REGULATION_OF_NUCLEAR_TRANSCRIBED_MRNA_POLY_A_TAIL_SHORTENING		14	0.6296882	1.485939	0.049281314	0.21600363	1	6374	tags=50%, list=12%, signal=57%
GO_REGULATION_OF_GLIOGENESIS	GO_REGULATION_OF_GLIOGENESIS		119	0.41646355	1.4856128	0.035	0.21627262	1	4671	tags=21%, list=8%, signal=23%
GO_ARACHIDONIC_ACID_SECRETION	GO_ARACHIDONIC_ACID_SECRETION		31	0.47363207	1.4854771	0.033816423	0.21628223	1	8239	tags=39%, list=15%, signal=45%
GO_NEGATIVE_REGULATION_OF_SYNAPTIC_TRANSMISSION_GABAERGIC	GO_NEGATIVE_REGULATION_OF_SYNAPTIC_TRANSMISSION_GABAERGIC		6	0.74209	1.4853281	0.05772812	0.21629983	1	4434	tags=50%, list=8%, signal=54%
GO_ANTIMICROBIAL_HUMORAL_RESPONSE	GO_ANTIMICROBIAL_HUMORAL_RESPONSE		122	0.4369056	1.4850736	0.031296574	0.21646585	1	9990	tags=38%, list=18%, signal=46%
GO_NEGATIVE_REGULATION_OF_ALPHA_BETA_T_CELL_PROLIFERATION	GO_NEGATIVE_REGULATION_OF_ALPHA_BETA_T_CELL_PROLIFERATION		9	0.6196135	1.4849235	0.056057867	0.21648958	1	2132	tags=44%, list=4%, signal=46%
GO_POSITIVE_REGULATION_OF_INFLAMMATORY_RESPONSE_TO_ANTIGENIC_STIMULUS	GO_POSITIVE_REGULATION_OF_INFLAMMATORY_RESPONSE_TO_ANTIGENIC_STIMULUS		11	0.6994061	1.4836426	0.06451613	0.21814883	1	8345	tags=82%, list=15%, signal=96%
GO_DEFENSE_RESPONSE_TO_FUNGUS	GO_DEFENSE_RESPONSE_TO_FUNGUS		38	0.4923825	1.4831294	0.04137931	0.21876186	1	6358	tags=29%, list=12%, signal=33%
GO_NEGATIVE_REGULATION_OF_BONE_MINERALIZATION	GO_NEGATIVE_REGULATION_OF_BONE_MINERALIZATION		18	0.55579406	1.482744	0.04770318	0.21913388	1	7691	tags=28%, list=14%, signal=32%
GO_GLAND_MORPHOGENESIS	GO_GLAND_MORPHOGENESIS		118	0.436403	1.4817849	0.05667276	0.22046997	1	11205	tags=40%, list=20%, signal=50%
GO_TISSUE_HOMEOSTASIS	GO_TISSUE_HOMEOSTASIS		220	0.3885507	1.4813201	0.018333333	0.22099341	1	10665	tags=33%, list=19%, signal=40%
GO_GOLGI_TO_ENDOSOME_TRANSPORT	GO_GOLGI_TO_ENDOSOME_TRANSPORT		17	0.5980073	1.4799736	0.090361446	0.22282843	1	8021	tags=41%, list=15%, signal=48%
GO_ICOSANOID_CATABOLIC_PROCESS	GO_ICOSANOID_CATABOLIC_PROCESS		5	0.75631994	1.4791142	0.05204461	0.22397801	1	10764	tags=60%, list=20%, signal=75%
GO_REGULATION_OF_EPIDERMIS_DEVELOPMENT	GO_REGULATION_OF_EPIDERMIS_DEVELOPMENT		82	0.42149848	1.4790502	0.023636363	0.22385664	1	10997	tags=33%, list=20%, signal=41%
GO_NEGATIVE_REGULATION_OF_LOW_DENSITY_LIPOPROTEIN_PARTICLE_CLEARANCE	GO_NEGATIVE_REGULATION_OF_LOW_DENSITY_LIPOPROTEIN_PARTICLE_CLEARANCE		13	0.5980044	1.4786217	0.056603774	0.22428346	1	22080	tags=92%, list=40%, signal=154%
GO_POSITIVE_REGULATION_OF_PHOSPHORUS_METABOLIC_PROCESS	GO_POSITIVE_REGULATION_OF_PHOSPHORUS_METABOLIC_PROCESS		1070	0.36652324	1.4783753	0.04	0.22443086	1	7435	tags=26%, list=13%, signal=29%
GO_POSITIVE_REGULATION_OF_MULTICELLULAR_ORGANISMAL_PROCESS	GO_POSITIVE_REGULATION_OF_MULTICELLULAR_ORGANISMAL_PROCESS		1762	0.3710147	1.4780254	0.046793763	0.2247379	1	7831	tags=26%, list=14%, signal=29%
GO_PARENTAL_BEHAVIOR	GO_PARENTAL_BEHAVIOR		14	0.574211	1.4778076	0.0647482	0.22482938	1	6225	tags=43%, list=11%, signal=48%
GO_POSITIVE_REGULATION_OF_SECRETION	GO_POSITIVE_REGULATION_OF_SECRETION		411	0.3692521	1.4777073	0.034201954	0.22476998	1	9033	tags=29%, list=16%, signal=34%
GO_NEGATIVE_REGULATION_OF_OXIDOREDUCTASE_ACTIVITY	GO_NEGATIVE_REGULATION_OF_OXIDOREDUCTASE_ACTIVITY		33	0.46886405	1.4775751	0.047138046	0.2247922	1	10029	tags=45%, list=18%, signal=56%
GO_POSITIVE_REGULATION_OF_HUMORAL_IMMUNE_RESPONSE	GO_POSITIVE_REGULATION_OF_HUMORAL_IMMUNE_RESPONSE		18	0.5581812	1.4773086	0.08007117	0.22498745	1	8345	tags=44%, list=15%, signal=52%
GO_SPROUTING_ANGIOGENESIS	GO_SPROUTING_ANGIOGENESIS		166	0.3985171	1.4771581	0.06481481	0.22501244	1	11211	tags=36%, list=20%, signal=45%
GO_WATER_TRANSPORT	GO_WATER_TRANSPORT		19	0.5519815	1.4770536	0.052718285	0.22495623	1	11921	tags=47%, list=22%, signal=60%
GO_TISSUE_REMODELING	GO_TISSUE_REMODELING		162	0.42240253	1.4754728	0.05925926	0.22712831	1	5587	tags=24%, list=10%, signal=27%
GO_METANEPHRIC_TUBULE_FORMATION	GO_METANEPHRIC_TUBULE_FORMATION		6	0.74929917	1.4749693	0.058020476	0.22766939	1	13750	tags=67%, list=25%, signal=89%
GO_RENAL_SYSTEM_PROCESS	GO_RENAL_SYSTEM_PROCESS		117	0.43895698	1.4746	0.060344826	0.22799474	1	7343	tags=27%, list=13%, signal=31%
GO_REGULATION_OF_EXTRACELLULAR_MATRIX_CONSTITUENT_SECRETION	GO_REGULATION_OF_EXTRACELLULAR_MATRIX_CONSTITUENT_SECRETION		7	0.6557277	1.4743372	0.045296166	0.22815506	1	1476	tags=29%, list=3%, signal=29%
GO_ISG15_PROTEIN_CONJUGATION	GO_ISG15_PROTEIN_CONJUGATION		6	0.76572734	1.4738574	0.07539683	0.2286479	1	9750	tags=67%, list=18%, signal=81%
GO_NEGATIVE_REGULATION_OF_MYOSIN_LIGHT_CHAIN_PHOSPHATASE_ACTIVITY	GO_NEGATIVE_REGULATION_OF_MYOSIN_LIGHT_CHAIN_PHOSPHATASE_ACTIVITY		5	0.7743943	1.4735843	0.057086613	0.22890328	1	8345	tags=80%, list=15%, signal=94%
GO_HETEROPHILIC_CELL_CELL_ADHESION_VIA_PLASMA_MEMBRANE_CELL_ADHESION_MOLECULES	GO_HETEROPHILIC_CELL_CELL_ADHESION_VIA_PLASMA_MEMBRANE_CELL_ADHESION_MOLECULES		46	0.47322866	1.4734411	0.05942275	0.22888894	1	5024	tags=28%, list=9%, signal=31%
GO_REGULATION_OF_B_CELL_APOPTOTIC_PROCESS	GO_REGULATION_OF_B_CELL_APOPTOTIC_PROCESS		18	0.5206543	1.4732394	0.06111111	0.22898144	1	6122	tags=33%, list=11%, signal=37%
GO_REGULATION_OF_ISOTYPE_SWITCHING	GO_REGULATION_OF_ISOTYPE_SWITCHING		35	0.5248904	1.4724219	0.08514493	0.22997615	1	9048	tags=40%, list=16%, signal=48%
GO_BLOOD_COAGULATION_INTRINSIC_PATHWAY	GO_BLOOD_COAGULATION_INTRINSIC_PATHWAY		18	0.6163219	1.47229	0.07704918	0.2299777	1	8768	tags=56%, list=16%, signal=66%
GO_REGULATION_OF_ACUTE_INFLAMMATORY_RESPONSE_TO_ANTIGENIC_STIMULUS	GO_REGULATION_OF_ACUTE_INFLAMMATORY_RESPONSE_TO_ANTIGENIC_STIMULUS		13	0.5979938	1.4714932	0.09352518	0.2310653	1	7459	tags=69%, list=14%, signal=80%
GO_SOMATIC_DIVERSIFICATION_OF_IMMUNE_RECEPTORS	GO_SOMATIC_DIVERSIFICATION_OF_IMMUNE_RECEPTORS		70	0.48618916	1.471354	0.077634014	0.23108967	1	6256	tags=31%, list=11%, signal=35%
GO_REGULATION_OF_CHRONIC_INFLAMMATORY_RESPONSE	GO_REGULATION_OF_CHRONIC_INFLAMMATORY_RESPONSE		9	0.67320865	1.468134	0.1	0.23583019	1	8345	tags=67%, list=15%, signal=79%
GO_ENTRAINMENT_OF_CIRCADIAN_CLOCK	GO_ENTRAINMENT_OF_CIRCADIAN_CLOCK		27	0.5046143	1.4677225	0.08348794	0.23623629	1	8092	tags=37%, list=15%, signal=43%
GO_TRANSFORMING_GROWTH_FACTOR_BETA_PRODUCTION	GO_TRANSFORMING_GROWTH_FACTOR_BETA_PRODUCTION		37	0.50141597	1.4672253	0.06333973	0.23683253	1	4895	tags=32%, list=9%, signal=36%
GO_REGULATION_OF_CARDIAC_MUSCLE_TISSUE_REGENERATION	GO_REGULATION_OF_CARDIAC_MUSCLE_TISSUE_REGENERATION		6	0.6743529	1.4672022	0.062626265	0.23665924	1	8601	tags=50%, list=16%, signal=59%
GO_SIGNAL_TRANSDUCTION_BY_PROTEIN_PHOSPHORYLATION	GO_SIGNAL_TRANSDUCTION_BY_PROTEIN_PHOSPHORYLATION		948	0.36296132	1.4667168	0.041025642	0.23716265	1	8824	tags=29%, list=16%, signal=34%
GO_GLYCEROPHOSPHOLIPID_CATABOLIC_PROCESS	GO_GLYCEROPHOSPHOLIPID_CATABOLIC_PROCESS		23	0.49977905	1.4665588	0.0626186	0.23720783	1	5918	tags=35%, list=11%, signal=39%
GO_MAINTENANCE_OF_DNA_REPEAT_ELEMENTS	GO_MAINTENANCE_OF_DNA_REPEAT_ELEMENTS		6	0.75811356	1.4663869	0.044401545	0.23726374	1	9048	tags=67%, list=16%, signal=80%
GO_CELL_ADHESION_MEDIATED_BY_INTEGRIN	GO_CELL_ADHESION_MEDIATED_BY_INTEGRIN		68	0.47148088	1.4663706	0.08671587	0.23707055	1	5214	tags=29%, list=9%, signal=32%
GO_REGULATION_OF_GRANULOCYTE_DIFFERENTIATION	GO_REGULATION_OF_GRANULOCYTE_DIFFERENTIATION		15	0.59870976	1.4663004	0.07468124	0.23695749	1	6946	tags=47%, list=13%, signal=53%
GO_POSITIVE_REGULATION_OF_PHOSPHOLIPASE_ACTIVITY	GO_POSITIVE_REGULATION_OF_PHOSPHOLIPASE_ACTIVITY		58	0.46447968	1.4650458	0.07105719	0.2386721	1	14833	tags=50%, list=27%, signal=68%
GO_POSITIVE_REGULATION_OF_SODIUM_ION_TRANSMEMBRANE_TRANSPORT	GO_POSITIVE_REGULATION_OF_SODIUM_ION_TRANSMEMBRANE_TRANSPORT		21	0.5295915	1.4648701	0.07734807	0.23874623	1	10132	tags=52%, list=18%, signal=64%
GO_REGULATION_OF_PSEUDOPODIUM_ASSEMBLY	GO_REGULATION_OF_PSEUDOPODIUM_ASSEMBLY		14	0.53969294	1.4647194	0.06326889	0.23878479	1	6216	tags=43%, list=11%, signal=48%
GO_ONE_CARBON_COMPOUND_TRANSPORT	GO_ONE_CARBON_COMPOUND_TRANSPORT		11	0.61479855	1.4646268	0.060240965	0.23873071	1	10385	tags=45%, list=19%, signal=56%
GO_REGULATION_OF_CELLULAR_COMPONENT_MOVEMENT	GO_REGULATION_OF_CELLULAR_COMPONENT_MOVEMENT		1037	0.37455007	1.4645467	0.059139784	0.23866232	1	8915	tags=28%, list=16%, signal=33%
GO_POSITIVE_REGULATION_OF_MACROPHAGE_MIGRATION	GO_POSITIVE_REGULATION_OF_MACROPHAGE_MIGRATION		19	0.5539679	1.4644454	0.08108108	0.23861963	1	2008	tags=26%, list=4%, signal=27%
GO_REGULATION_OF_NK_T_CELL_DIFFERENTIATION	GO_REGULATION_OF_NK_T_CELL_DIFFERENTIATION		6	0.7180981	1.4634173	0.072407044	0.2400532	1	9766	tags=67%, list=18%, signal=81%
GO_GDP_METABOLIC_PROCESS	GO_GDP_METABOLIC_PROCESS		8	0.63334453	1.463312	0.08761905	0.2400151	1	14723	tags=63%, list=27%, signal=85%
GO_EXOCYTOSIS	GO_EXOCYTOSIS		895	0.36147982	1.4620203	0.040998217	0.24184483	1	7737	tags=27%, list=14%, signal=31%
GO_REGULATION_OF_DNA_BINDING_TRANSCRIPTION_FACTOR_ACTIVITY	GO_REGULATION_OF_DNA_BINDING_TRANSCRIPTION_FACTOR_ACTIVITY		424	0.3730464	1.4612651	0.044247787	0.2428376	1	6419	tags=25%, list=12%, signal=28%
GO_CELLULAR_RESPONSE_TO_MURAMYL_DIPEPTIDE	GO_CELLULAR_RESPONSE_TO_MURAMYL_DIPEPTIDE		9	0.63615054	1.4606587	0.06754221	0.24352852	1	2295	tags=22%, list=4%, signal=23%
GO_NEGATIVE_REGULATION_OF_VASCULAR_PERMEABILITY	GO_NEGATIVE_REGULATION_OF_VASCULAR_PERMEABILITY		12	0.62897694	1.4593213	0.07372401	0.24544708	1	8705	tags=50%, list=16%, signal=59%
GO_CELLULAR_RESPONSE_TO_GROWTH_HORMONE_STIMULUS	GO_CELLULAR_RESPONSE_TO_GROWTH_HORMONE_STIMULUS		24	0.5269191	1.4583724	0.08648649	0.24673378	1	5349	tags=33%, list=10%, signal=37%
GO_REGULATION_OF_SYNCYTIUM_FORMATION_BY_PLASMA_MEMBRANE_FUSION	GO_REGULATION_OF_SYNCYTIUM_FORMATION_BY_PLASMA_MEMBRANE_FUSION		29	0.53821826	1.4583175	0.10497238	0.24659397	1	3384	tags=31%, list=6%, signal=33%
GO_REGULATION_OF_MONOCYTE_CHEMOTAXIS	GO_REGULATION_OF_MONOCYTE_CHEMOTAXIS		25	0.52755857	1.4580177	0.09618875	0.24684568	1	6156	tags=36%, list=11%, signal=41%
GO_CYTOPLASMIC_PATTERN_RECOGNITION_RECEPTOR_SIGNALING_PATHWAY_IN_RESPONSE_TO_VIRUS	GO_CYTOPLASMIC_PATTERN_RECOGNITION_RECEPTOR_SIGNALING_PATHWAY_IN_RESPONSE_TO_VIRUS		27	0.4833432	1.4579571	0.05818182	0.24673477	1	6562	tags=37%, list=12%, signal=42%
GO_REGULATION_OF_ANGIOTENSIN_LEVELS_IN_BLOOD	GO_REGULATION_OF_ANGIOTENSIN_LEVELS_IN_BLOOD		11	0.65015787	1.4578016	0.08952381	0.24674529	1	1630	tags=36%, list=3%, signal=37%
GO_NEGATIVE_REGULATION_OF_HEMATOPOIETIC_PROGENITOR_CELL_DIFFERENTIATION	GO_NEGATIVE_REGULATION_OF_HEMATOPOIETIC_PROGENITOR_CELL_DIFFERENTIATION		7	0.6769663	1.457279	0.061420344	0.24736755	1	5968	tags=43%, list=11%, signal=48%
GO_PROTEIN_K11_LINKED_DEUBIQUITINATION	GO_PROTEIN_K11_LINKED_DEUBIQUITINATION		10	0.63685703	1.4571291	0.06844106	0.24738392	1	9633	tags=50%, list=17%, signal=61%
GO_REGULATION_OF_XENOPHAGY	GO_REGULATION_OF_XENOPHAGY		6	0.6788871	1.4568416	0.07258064	0.24766593	1	10649	tags=50%, list=19%, signal=62%
GO_B_CELL_APOPTOTIC_PROCESS	GO_B_CELL_APOPTOTIC_PROCESS		24	0.47588617	1.4563061	0.0742115	0.24831653	1	6122	tags=29%, list=11%, signal=33%
GO_PROTEIN_KINASE_B_SIGNALING	GO_PROTEIN_KINASE_B_SIGNALING		258	0.38392514	1.456087	0.042735044	0.24843496	1	6289	tags=25%, list=11%, signal=28%
GO_NEGATIVE_REGULATION_OF_EPIDERMAL_CELL_DIFFERENTIATION	GO_NEGATIVE_REGULATION_OF_EPIDERMAL_CELL_DIFFERENTIATION		13	0.553686	1.4558395	0.064935066	0.24859701	1	14237	tags=62%, list=26%, signal=83%
GO_NEGATIVE_REGULATION_OF_COFACTOR_METABOLIC_PROCESS	GO_NEGATIVE_REGULATION_OF_COFACTOR_METABOLIC_PROCESS		8	0.6507884	1.454983	0.08196721	0.24976094	1	12848	tags=63%, list=23%, signal=81%
GO_CHEMOKINE_C_C_MOTIF_LIGAND_5_PRODUCTION	GO_CHEMOKINE_C_C_MOTIF_LIGAND_5_PRODUCTION		10	0.61189616	1.4549353	0.08695652	0.24963637	1	8214	tags=60%, list=15%, signal=70%
GO_POSITIVE_CHEMOTAXIS	GO_POSITIVE_CHEMOTAXIS		68	0.4311066	1.4547175	0.069139965	0.2497635	1	8797	tags=38%, list=16%, signal=45%
GO_POSITIVE_REGULATION_OF_GLIOGENESIS	GO_POSITIVE_REGULATION_OF_GLIOGENESIS		70	0.42657948	1.4546756	0.04890388	0.24960905	1	4054	tags=20%, list=7%, signal=22%
GO_INTEGRIN_MEDIATED_SIGNALING_PATHWAY	GO_INTEGRIN_MEDIATED_SIGNALING_PATHWAY		99	0.4666212	1.45445	0.10207939	0.24973921	1	4644	tags=26%, list=8%, signal=29%
GO_CELLULAR_RESPONSE_TO_NITRIC_OXIDE	GO_CELLULAR_RESPONSE_TO_NITRIC_OXIDE		16	0.5713504	1.4543685	0.06367041	0.2496394	1	5613	tags=38%, list=10%, signal=42%
GO_G_PROTEIN_COUPLED_RECEPTOR_SIGNALING_PATHWAY	GO_G_PROTEIN_COUPLED_RECEPTOR_SIGNALING_PATHWAY		1356	0.33596307	1.4541539	0.024711696	0.2497537	1	9938	tags=24%, list=18%, signal=28%
GO_POSITIVE_REGULATION_OF_EXOCYTOSIS	GO_POSITIVE_REGULATION_OF_EXOCYTOSIS		86	0.39053017	1.4540192	0.044444446	0.24976143	1	6948	tags=30%, list=13%, signal=35%
GO_MAMMARY_GLAND_FORMATION	GO_MAMMARY_GLAND_FORMATION		7	0.74101955	1.4540015	0.06846847	0.24957326	1	12612	tags=71%, list=23%, signal=93%
GO_NUCLEOTIDE_BINDING_DOMAIN_LEUCINE_RICH_REPEAT_CONTAINING_RECEPTOR_SIGNALING_PATHWAY	GO_NUCLEOTIDE_BINDING_DOMAIN_LEUCINE_RICH_REPEAT_CONTAINING_RECEPTOR_SIGNALING_PATHWAY		36	0.48908037	1.4537514	0.11854684	0.24977797	1	7266	tags=33%, list=13%, signal=38%
GO_EXTRACELLULAR_MATRIX_CONSTITUENT_SECRETION	GO_EXTRACELLULAR_MATRIX_CONSTITUENT_SECRETION		11	0.60176325	1.4535977	0.06939502	0.2498093	1	1604	tags=27%, list=3%, signal=28%
GO_NEGATIVE_REGULATION_OF_GRANULOCYTE_DIFFERENTIATION	GO_NEGATIVE_REGULATION_OF_GRANULOCYTE_DIFFERENTIATION		8	0.6748896	1.4534005	0.09038462	0.24991168	1	2308	tags=50%, list=4%, signal=52%
GO_GLOMERULAR_EPITHELIUM_DEVELOPMENT	GO_GLOMERULAR_EPITHELIUM_DEVELOPMENT		20	0.55127466	1.4532295	0.06495727	0.24996601	1	9806	tags=45%, list=18%, signal=55%
GO_POSITIVE_REGULATION_OF_PRODUCTION_OF_MIRNAS_INVOLVED_IN_GENE_SILENCING_BY_MIRNA	GO_POSITIVE_REGULATION_OF_PRODUCTION_OF_MIRNAS_INVOLVED_IN_GENE_SILENCING_BY_MIRNA		9	0.60473657	1.4523436	0.07178631	0.25115678	1	5324	tags=44%, list=10%, signal=49%
GO_LONG_CHAIN_FATTY_ACID_BIOSYNTHETIC_PROCESS	GO_LONG_CHAIN_FATTY_ACID_BIOSYNTHETIC_PROCESS		25	0.5088072	1.4520941	0.06678082	0.25132853	1	12704	tags=40%, list=23%, signal=52%
GO_POSITIVE_REGULATION_OF_CELL_MATRIX_ADHESION	GO_POSITIVE_REGULATION_OF_CELL_MATRIX_ADHESION		50	0.45657924	1.4512603	0.07183365	0.25250852	1	6866	tags=38%, list=12%, signal=43%
GO_NEGATIVE_REGULATION_OF_CHEMOTAXIS	GO_NEGATIVE_REGULATION_OF_CHEMOTAXIS		60	0.44466498	1.451197	0.08211679	0.2523918	1	2783	tags=23%, list=5%, signal=25%
GO_SECOND_MESSENGER_MEDIATED_SIGNALING	GO_SECOND_MESSENGER_MEDIATED_SIGNALING		437	0.39462504	1.4511701	0.06312292	0.25221202	1	6289	tags=23%, list=11%, signal=26%
GO_ADHERENS_JUNCTION_MAINTENANCE	GO_ADHERENS_JUNCTION_MAINTENANCE		6	0.6899227	1.4510702	0.07436399	0.25214353	1	4268	tags=33%, list=8%, signal=36%
GO_MAMMARY_GLAND_EPITHELIUM_DEVELOPMENT	GO_MAMMARY_GLAND_EPITHELIUM_DEVELOPMENT		70	0.42665932	1.4503258	0.06725664	0.25309148	1	10621	tags=33%, list=19%, signal=41%
GO_MHC_PROTEIN_COMPLEX_ASSEMBLY	GO_MHC_PROTEIN_COMPLEX_ASSEMBLY		6	0.83790296	1.4502105	0.074	0.25305372	1	751	tags=67%, list=1%, signal=68%
GO_CANNABINOID_SIGNALING_PATHWAY	GO_CANNABINOID_SIGNALING_PATHWAY		7	0.6962181	1.4494181	0.08037383	0.2541293	1	4976	tags=57%, list=9%, signal=63%
GO_NEGATIVE_REGULATION_OF_DENDRITE_MORPHOGENESIS	GO_NEGATIVE_REGULATION_OF_DENDRITE_MORPHOGENESIS		15	0.56051856	1.4490999	0.08022388	0.2544449	1	4151	tags=33%, list=8%, signal=36%
GO_POSITIVE_REGULATION_OF_MAST_CELL_ACTIVATION_INVOLVED_IN_IMMUNE_RESPONSE	GO_POSITIVE_REGULATION_OF_MAST_CELL_ACTIVATION_INVOLVED_IN_IMMUNE_RESPONSE		14	0.5333345	1.4482992	0.082417585	0.25551504	1	2472	tags=29%, list=4%, signal=30%
GO_REGULATION_OF_SYSTEMIC_ARTERIAL_BLOOD_PRESSURE_BY_HORMONE	GO_REGULATION_OF_SYSTEMIC_ARTERIAL_BLOOD_PRESSURE_BY_HORMONE		39	0.49902242	1.4480301	0.071428575	0.25573272	1	4530	tags=23%, list=8%, signal=25%
GO_NEGATIVE_REGULATION_OF_NIK_NF_KAPPAB_SIGNALING	GO_NEGATIVE_REGULATION_OF_NIK_NF_KAPPAB_SIGNALING		24	0.5078303	1.4477949	0.0625	0.25587678	1	4233	tags=29%, list=8%, signal=32%
GO_NEGATIVE_REGULATION_OF_LEUKOCYTE_ADHESION_TO_VASCULAR_ENDOTHELIAL_CELL	GO_NEGATIVE_REGULATION_OF_LEUKOCYTE_ADHESION_TO_VASCULAR_ENDOTHELIAL_CELL		10	0.6140923	1.4475656	0.054446463	0.25601736	1	8158	tags=40%, list=15%, signal=47%
GO_POSITIVE_REGULATION_OF_PROTEIN_TYROSINE_KINASE_ACTIVITY	GO_POSITIVE_REGULATION_OF_PROTEIN_TYROSINE_KINASE_ACTIVITY		55	0.4300573	1.4465821	0.075	0.25739306	1	2623	tags=20%, list=5%, signal=21%
GO_ADAPTATION_OF_SIGNALING_PATHWAY	GO_ADAPTATION_OF_SIGNALING_PATHWAY		21	0.49770805	1.4464655	0.052083332	0.25733986	1	8369	tags=43%, list=15%, signal=50%
GO_MAMMARY_GLAND_DUCT_MORPHOGENESIS	GO_MAMMARY_GLAND_DUCT_MORPHOGENESIS		32	0.48473713	1.4457371	0.07276119	0.2583281	1	10621	tags=44%, list=19%, signal=54%
GO_SINGLE_STRANDED_VIRAL_RNA_REPLICATION_VIA_DOUBLE_STRANDED_DNA_INTERMEDIATE	GO_SINGLE_STRANDED_VIRAL_RNA_REPLICATION_VIA_DOUBLE_STRANDED_DNA_INTERMEDIATE		18	0.5902413	1.4449698	0.0951526	0.2594071	1	4326	tags=44%, list=8%, signal=48%
GO_NEGATIVE_REGULATION_OF_ENDOTHELIAL_CELL_DIFFERENTIATION	GO_NEGATIVE_REGULATION_OF_ENDOTHELIAL_CELL_DIFFERENTIATION		10	0.609961	1.4446747	0.11363637	0.25965273	1	18477	tags=60%, list=33%, signal=90%
GO_MALE_MATING_BEHAVIOR	GO_MALE_MATING_BEHAVIOR		8	0.6055922	1.4446275	0.073076926	0.25949246	1	3948	tags=38%, list=7%, signal=40%
GO_REGULATION_OF_INTRACELLULAR_SIGNAL_TRANSDUCTION	GO_REGULATION_OF_INTRACELLULAR_SIGNAL_TRANSDUCTION		1814	0.35938776	1.4445863	0.053097345	0.25933838	1	8824	tags=27%, list=16%, signal=31%
GO_POSITIVE_REGULATION_OF_NEUROINFLAMMATORY_RESPONSE	GO_POSITIVE_REGULATION_OF_NEUROINFLAMMATORY_RESPONSE		19	0.5365072	1.4443651	0.09270217	0.25946268	1	8822	tags=42%, list=16%, signal=50%
GO_REGULATION_OF_CELL_FATE_COMMITMENT	GO_REGULATION_OF_CELL_FATE_COMMITMENT		31	0.4992187	1.4440898	0.07550645	0.25969577	1	7360	tags=32%, list=13%, signal=37%
GO_NEGATIVE_REGULATION_OF_BIOMINERAL_TISSUE_DEVELOPMENT	GO_NEGATIVE_REGULATION_OF_BIOMINERAL_TISSUE_DEVELOPMENT		24	0.52185297	1.4440287	0.083333336	0.25957036	1	4455	tags=25%, list=8%, signal=27%
GO_ACTIVATION_OF_NF_KAPPAB_INDUCING_KINASE_ACTIVITY	GO_ACTIVATION_OF_NF_KAPPAB_INDUCING_KINASE_ACTIVITY		18	0.5462295	1.4436382	0.102514505	0.2599916	1	6364	tags=44%, list=12%, signal=50%
GO_POSITIVE_REGULATION_OF_INTERLEUKIN_6_BIOSYNTHETIC_PROCESS	GO_POSITIVE_REGULATION_OF_INTERLEUKIN_6_BIOSYNTHETIC_PROCESS		12	0.6045322	1.4433848	0.089866154	0.26016676	1	4333	tags=50%, list=8%, signal=54%
GO_PHOSPHORYLATED_CARBOHYDRATE_DEPHOSPHORYLATION	GO_PHOSPHORYLATED_CARBOHYDRATE_DEPHOSPHORYLATION		15	0.5666028	1.4430548	0.08637236	0.26049602	1	4682	tags=40%, list=8%, signal=44%
GO_OSTEOBLAST_PROLIFERATION	GO_OSTEOBLAST_PROLIFERATION		28	0.4979852	1.4426951	0.05860806	0.26086074	1	7161	tags=39%, list=13%, signal=45%
GO_THYMOCYTE_MIGRATION	GO_THYMOCYTE_MIGRATION		6	0.734275	1.4426194	0.070143886	0.26078665	1	4485	tags=50%, list=8%, signal=54%
GO_POSITIVE_REGULATION_OF_ANTIGEN_PROCESSING_AND_PRESENTATION	GO_POSITIVE_REGULATION_OF_ANTIGEN_PROCESSING_AND_PRESENTATION		9	0.65533555	1.4418712	0.092391305	0.26181975	1	6216	tags=56%, list=11%, signal=63%
GO_CELLULAR_RESPONSE_TO_ETHANOL	GO_CELLULAR_RESPONSE_TO_ETHANOL		14	0.5827056	1.4417435	0.07865169	0.26182514	1	6768	tags=50%, list=12%, signal=57%
GO_INORGANIC_ION_IMPORT_ACROSS_PLASMA_MEMBRANE	GO_INORGANIC_ION_IMPORT_ACROSS_PLASMA_MEMBRANE		84	0.42859238	1.4410888	0.05762712	0.26265597	1	13452	tags=43%, list=24%, signal=57%
GO_SODIUM_ION_HOMEOSTASIS	GO_SODIUM_ION_HOMEOSTASIS		52	0.45853713	1.4409645	0.047923323	0.26264986	1	5633	tags=27%, list=10%, signal=30%
GO_FOREBRAIN_RADIAL_GLIAL_CELL_DIFFERENTIATION	GO_FOREBRAIN_RADIAL_GLIAL_CELL_DIFFERENTIATION		7	0.646991	1.4403992	0.06967985	0.26336238	1	9860	tags=43%, list=18%, signal=52%
GO_MATERNAL_PROCESS_INVOLVED_IN_PARTURITION	GO_MATERNAL_PROCESS_INVOLVED_IN_PARTURITION		8	0.64672613	1.4403592	0.083333336	0.2632121	1	4530	tags=38%, list=8%, signal=41%
GO_SECRETION	GO_SECRETION		1628	0.35101435	1.4398828	0.044444446	0.26373273	1	6420	tags=23%, list=12%, signal=26%
GO_CELLULAR_RESPONSE_TO_CORTICOSTEROID_STIMULUS	GO_CELLULAR_RESPONSE_TO_CORTICOSTEROID_STIMULUS		63	0.43028304	1.4398618	0.066189624	0.26354542	1	6374	tags=30%, list=12%, signal=34%
GO_POSITIVE_REGULATION_OF_LOCOMOTION	GO_POSITIVE_REGULATION_OF_LOCOMOTION		567	0.381338	1.4396765	0.07220217	0.26363623	1	8873	tags=30%, list=16%, signal=36%
GO_POSITIVE_REGULATION_OF_PROTEIN_SERINE_THREONINE_KINASE_ACTIVITY	GO_POSITIVE_REGULATION_OF_PROTEIN_SERINE_THREONINE_KINASE_ACTIVITY		329	0.37448868	1.4396648	0.0647986	0.26342845	1	7307	tags=26%, list=13%, signal=30%
GO_PHOTOPERIODISM	GO_PHOTOPERIODISM		25	0.48916158	1.4396247	0.08396947	0.2632713	1	8458	tags=36%, list=15%, signal=42%
GO_REGULATION_OF_EXOCYTOSIS	GO_REGULATION_OF_EXOCYTOSIS		215	0.3920049	1.439372	0.05263158	0.2634528	1	7313	tags=28%, list=13%, signal=32%
GO_POSITIVE_REGULATION_OF_RESPONSE_TO_OXIDATIVE_STRESS	GO_POSITIVE_REGULATION_OF_RESPONSE_TO_OXIDATIVE_STRESS		18	0.49541008	1.4393313	0.05185185	0.26330552	1	8501	tags=50%, list=15%, signal=59%
GO_L_ARGININE_TRANSPORT	GO_L_ARGININE_TRANSPORT		8	0.62164104	1.4392191	0.062166963	0.26325	1	9768	tags=63%, list=18%, signal=76%
GO_POSITIVE_REGULATION_OF_SIGNALING	GO_POSITIVE_REGULATION_OF_SIGNALING		1806	0.34870955	1.4382491	0.04786325	0.2646324	1	7360	tags=24%, list=13%, signal=27%
GO_POSITIVE_REGULATION_OF_ACTIN_FILAMENT_POLYMERIZATION	GO_POSITIVE_REGULATION_OF_ACTIN_FILAMENT_POLYMERIZATION		101	0.38728002	1.4379469	0.06238532	0.26489273	1	6216	tags=24%, list=11%, signal=27%
GO_POTASSIUM_ION_IMPORT_ACROSS_PLASMA_MEMBRANE	GO_POTASSIUM_ION_IMPORT_ACROSS_PLASMA_MEMBRANE		46	0.4682347	1.4375575	0.06301824	0.26533166	1	12970	tags=43%, list=24%, signal=57%
GO_VIRAL_LIFE_CYCLE	GO_VIRAL_LIFE_CYCLE		323	0.37372622	1.4374003	0.070017956	0.2653715	1	7420	tags=28%, list=13%, signal=33%
GO_REGULATION_OF_ISOTYPE_SWITCHING_TO_IGE_ISOTYPES	GO_REGULATION_OF_ISOTYPE_SWITCHING_TO_IGE_ISOTYPES		7	0.6250656	1.4365119	0.06653992	0.2665422	1	5494	tags=29%, list=10%, signal=32%
GO_BONE_MATURATION	GO_BONE_MATURATION		21	0.5420781	1.436465	0.09107143	0.266404	1	6753	tags=33%, list=12%, signal=38%
GO_NEGATIVE_REGULATION_OF_PHAGOCYTOSIS	GO_NEGATIVE_REGULATION_OF_PHAGOCYTOSIS		18	0.5415245	1.4364263	0.10966543	0.2662474	1	7624	tags=44%, list=14%, signal=52%
GO_REGULATION_OF_HYDROLASE_ACTIVITY	GO_REGULATION_OF_HYDROLASE_ACTIVITY		1256	0.34486687	1.436335	0.049488056	0.2661725	1	7135	tags=24%, list=13%, signal=27%
GO_AUTOCRINE_SIGNALING	GO_AUTOCRINE_SIGNALING		7	0.6601982	1.4362074	0.077220075	0.2661626	1	5272	tags=57%, list=10%, signal=63%
GO_RUFFLE_ASSEMBLY	GO_RUFFLE_ASSEMBLY		41	0.41954944	1.4360838	0.0626118	0.266136	1	5927	tags=27%, list=11%, signal=30%
GO_REGULATION_OF_CELL_POPULATION_PROLIFERATION	GO_REGULATION_OF_CELL_POPULATION_PROLIFERATION		1664	0.34837434	1.4358748	0.047945205	0.2662681	1	6374	tags=23%, list=12%, signal=25%
GO_PROGRAMMED_CELL_DEATH_INVOLVED_IN_CELL_DEVELOPMENT	GO_PROGRAMMED_CELL_DEATH_INVOLVED_IN_CELL_DEVELOPMENT		12	0.59962964	1.4357852	0.06486487	0.26619223	1	6915	tags=50%, list=13%, signal=57%
GO_NEGATIVE_REGULATION_OF_T_HELPER_1_TYPE_IMMUNE_RESPONSE	GO_NEGATIVE_REGULATION_OF_T_HELPER_1_TYPE_IMMUNE_RESPONSE		7	0.6695561	1.4354795	0.09461967	0.26642185	1	8822	tags=57%, list=16%, signal=68%
GO_ERYTHROCYTE_HOMEOSTASIS	GO_ERYTHROCYTE_HOMEOSTASIS		119	0.38703528	1.43493	0.05892857	0.2671369	1	10008	tags=32%, list=18%, signal=39%
GO_POSITIVE_REGULATION_OF_CATALYTIC_ACTIVITY	GO_POSITIVE_REGULATION_OF_CATALYTIC_ACTIVITY		1394	0.3601302	1.434405	0.0609319	0.267781	1	8932	tags=28%, list=16%, signal=33%
GO_REGULATION_OF_EPITHELIAL_CELL_PROLIFERATION_INVOLVED_IN_LUNG_MORPHOGENESIS	GO_REGULATION_OF_EPITHELIAL_CELL_PROLIFERATION_INVOLVED_IN_LUNG_MORPHOGENESIS		7	0.668984	1.4341623	0.09598604	0.26796436	1	14237	tags=86%, list=26%, signal=115%
GO_REGULATION_OF_RUFFLE_ASSEMBLY	GO_REGULATION_OF_RUFFLE_ASSEMBLY		29	0.4504836	1.4338696	0.069767445	0.2682127	1	5927	tags=34%, list=11%, signal=39%
GO_CARDIAC_LEFT_VENTRICLE_MORPHOGENESIS	GO_CARDIAC_LEFT_VENTRICLE_MORPHOGENESIS		14	0.58181906	1.4334335	0.08	0.26876104	1	4895	tags=43%, list=9%, signal=47%
GO_MUSCLE_HYPERPLASIA	GO_MUSCLE_HYPERPLASIA		5	0.7050705	1.4333838	0.068100356	0.2686093	1	1669	tags=40%, list=3%, signal=41%
GO_NEGATIVE_REGULATION_OF_T_CELL_MIGRATION	GO_NEGATIVE_REGULATION_OF_T_CELL_MIGRATION		5	0.7632699	1.4332622	0.0647482	0.2685777	1	4605	tags=60%, list=8%, signal=65%
GO_REGULATION_OF_LIPOPOLYSACCHARIDE_MEDIATED_SIGNALING_PATHWAY	GO_REGULATION_OF_LIPOPOLYSACCHARIDE_MEDIATED_SIGNALING_PATHWAY		25	0.5026273	1.4321449	0.057894737	0.2701602	1	10151	tags=52%, list=18%, signal=64%
GO_REGULATION_OF_LIPOPHAGY	GO_REGULATION_OF_LIPOPHAGY		5	0.7497188	1.4319078	0.079303674	0.27034804	1	6835	tags=60%, list=12%, signal=68%
GO_POSITIVE_REGULATION_OF_KINASE_ACTIVITY	GO_POSITIVE_REGULATION_OF_KINASE_ACTIVITY		565	0.37006006	1.4316455	0.064685315	0.27055773	1	7715	tags=26%, list=14%, signal=30%
GO_NEGATIVE_REGULATION_OF_GLYCOPROTEIN_BIOSYNTHETIC_PROCESS	GO_NEGATIVE_REGULATION_OF_GLYCOPROTEIN_BIOSYNTHETIC_PROCESS		12	0.5396655	1.431597	0.05904059	0.27042162	1	6692	tags=33%, list=12%, signal=38%
GO_REGULATION_OF_BONE_REMODELING	GO_REGULATION_OF_BONE_REMODELING		44	0.46386114	1.4311142	0.095914744	0.2709804	1	4735	tags=25%, list=9%, signal=27%
GO_POSITIVE_REGULATION_OF_MELANOCYTE_DIFFERENTIATION	GO_POSITIVE_REGULATION_OF_MELANOCYTE_DIFFERENTIATION		5	0.73761773	1.4307783	0.07102804	0.27132556	1	2997	tags=60%, list=5%, signal=63%
GO_PHOSPHOLIPID_CATABOLIC_PROCESS	GO_PHOSPHOLIPID_CATABOLIC_PROCESS		39	0.4462885	1.429779	0.05923345	0.2728367	1	12923	tags=44%, list=23%, signal=57%
GO_POSITIVE_REGULATION_OF_TYPE_2_IMMUNE_RESPONSE	GO_POSITIVE_REGULATION_OF_TYPE_2_IMMUNE_RESPONSE		15	0.5760176	1.4293272	0.09276438	0.27335778	1	8822	tags=53%, list=16%, signal=63%
GO_DETECTION_OF_CHEMICAL_STIMULUS_INVOLVED_IN_SENSORY_PERCEPTION_OF_TASTE	GO_DETECTION_OF_CHEMICAL_STIMULUS_INVOLVED_IN_SENSORY_PERCEPTION_OF_TASTE		46	0.45501217	1.4291466	0.05952381	0.27342677	1	15799	tags=54%, list=29%, signal=76%
GO_CELLULAR_RESPONSE_TO_LAMINAR_FLUID_SHEAR_STRESS	GO_CELLULAR_RESPONSE_TO_LAMINAR_FLUID_SHEAR_STRESS		8	0.6496856	1.4287987	0.08253359	0.27380523	1	2870	tags=38%, list=5%, signal=40%
GO_REGULATION_OF_MODIFICATION_OF_SYNAPTIC_STRUCTURE	GO_REGULATION_OF_MODIFICATION_OF_SYNAPTIC_STRUCTURE		10	0.6500489	1.4286997	0.0956023	0.27374598	1	6544	tags=50%, list=12%, signal=57%
GO_RESPONSE_TO_GRANULOCYTE_MACROPHAGE_COLONY_STIMULATING_FACTOR	GO_RESPONSE_TO_GRANULOCYTE_MACROPHAGE_COLONY_STIMULATING_FACTOR		9	0.66299796	1.4280524	0.099029124	0.2746189	1	6374	tags=56%, list=12%, signal=63%
GO_CELLULAR_RESPONSE_TO_CHOLESTEROL	GO_CELLULAR_RESPONSE_TO_CHOLESTEROL		20	0.51226366	1.4274876	0.094736844	0.27538988	1	11721	tags=50%, list=21%, signal=63%
GO_PROTEIN_K48_LINKED_DEUBIQUITINATION	GO_PROTEIN_K48_LINKED_DEUBIQUITINATION		34	0.46944907	1.4274513	0.09073724	0.27521816	1	5416	tags=29%, list=10%, signal=33%
GO_REGULATION_OF_MELANIN_BIOSYNTHETIC_PROCESS	GO_REGULATION_OF_MELANIN_BIOSYNTHETIC_PROCESS		10	0.6346407	1.4271886	0.08834586	0.27544636	1	4002	tags=40%, list=7%, signal=43%
GO_NEGATIVE_REGULATION_OF_STEM_CELL_DIFFERENTIATION	GO_NEGATIVE_REGULATION_OF_STEM_CELL_DIFFERENTIATION		20	0.5131048	1.4261659	0.09461967	0.27687815	1	3885	tags=30%, list=7%, signal=32%
GO_ENDOTHELIUM_DEVELOPMENT	GO_ENDOTHELIUM_DEVELOPMENT		123	0.421803	1.4258891	0.115384616	0.27713692	1	6273	tags=28%, list=11%, signal=31%
GO_PYRIMIDINE_NUCLEOBASE_METABOLIC_PROCESS	GO_PYRIMIDINE_NUCLEOBASE_METABOLIC_PROCESS		6	0.6387412	1.4257511	0.0665362	0.27716014	1	13702	tags=33%, list=25%, signal=44%
GO_PROTEIN_POLY_ADP_RIBOSYLATION	GO_PROTEIN_POLY_ADP_RIBOSYLATION		7	0.69942105	1.4256748	0.07020873	0.27706555	1	5660	tags=57%, list=10%, signal=64%
GO_NEGATIVE_REGULATION_OF_AMYLOID_PRECURSOR_PROTEIN_CATABOLIC_PROCESS	GO_NEGATIVE_REGULATION_OF_AMYLOID_PRECURSOR_PROTEIN_CATABOLIC_PROCESS		14	0.5518024	1.4255543	0.08671587	0.27702996	1	9990	tags=43%, list=18%, signal=52%
GO_REGULATION_OF_OSSIFICATION	GO_REGULATION_OF_OSSIFICATION		187	0.40616843	1.4252193	0.07678571	0.27731976	1	12249	tags=35%, list=22%, signal=45%
GO_HYPERSENSITIVITY	GO_HYPERSENSITIVITY		9	0.6473203	1.4250807	0.11730769	0.27731043	1	8497	tags=78%, list=15%, signal=92%
GO_UNSATURATED_FATTY_ACID_BIOSYNTHETIC_PROCESS	GO_UNSATURATED_FATTY_ACID_BIOSYNTHETIC_PROCESS		41	0.4257923	1.4250436	0.05464481	0.2771468	1	4530	tags=27%, list=8%, signal=29%
GO_REGULATION_OF_ISOMERASE_ACTIVITY	GO_REGULATION_OF_ISOMERASE_ACTIVITY		9	0.6574343	1.42473	0.09756097	0.2774513	1	18017	tags=78%, list=33%, signal=115%
GO_MEMBRANE_ORGANIZATION	GO_MEMBRANE_ORGANIZATION		876	0.34827003	1.4243432	0.051509768	0.27786803	1	4472	tags=19%, list=8%, signal=20%
GO_POSITIVE_REGULATION_OF_ANION_TRANSPORT	GO_POSITIVE_REGULATION_OF_ANION_TRANSPORT		50	0.42010128	1.4243422	0.048333332	0.27764606	1	7266	tags=32%, list=13%, signal=37%
GO_POSITIVE_REGULATION_OF_AUTOPHAGOSOME_MATURATION	GO_POSITIVE_REGULATION_OF_AUTOPHAGOSOME_MATURATION		7	0.66523975	1.4242518	0.10211946	0.27756432	1	8740	tags=71%, list=16%, signal=85%
GO_PHOSPHATIDYLINOSITOL_ACYL_CHAIN_REMODELING	GO_PHOSPHATIDYLINOSITOL_ACYL_CHAIN_REMODELING		16	0.52542126	1.4241719	0.07885305	0.27747652	1	5918	tags=44%, list=11%, signal=49%
GO_NEGATIVE_REGULATION_OF_APOPTOTIC_PROCESS_IN_BONE_MARROW_CELL	GO_NEGATIVE_REGULATION_OF_APOPTOTIC_PROCESS_IN_BONE_MARROW_CELL		5	0.71008754	1.4240597	0.07832423	0.27742437	1	12612	tags=80%, list=23%, signal=104%
GO_SECRETION_BY_TISSUE	GO_SECRETION_BY_TISSUE		37	0.45783055	1.4239305	0.066317625	0.27743003	1	4636	tags=27%, list=8%, signal=29%
GO_NEGATIVE_REGULATION_OF_NEUROLOGICAL_SYSTEM_PROCESS	GO_NEGATIVE_REGULATION_OF_NEUROLOGICAL_SYSTEM_PROCESS		24	0.46793208	1.4236786	0.07719928	0.27763322	1	9006	tags=42%, list=16%, signal=50%
GO_REGULATION_OF_EXTRINSIC_APOPTOTIC_SIGNALING_PATHWAY_VIA_DEATH_DOMAIN_RECEPTORS	GO_REGULATION_OF_EXTRINSIC_APOPTOTIC_SIGNALING_PATHWAY_VIA_DEATH_DOMAIN_RECEPTORS		58	0.44020778	1.4234818	0.07414105	0.27770925	1	6173	tags=29%, list=11%, signal=33%
GO_NEGATIVE_REGULATION_OF_BONE_DEVELOPMENT	GO_NEGATIVE_REGULATION_OF_BONE_DEVELOPMENT		10	0.64727485	1.4234611	0.10181818	0.27751908	1	2965	tags=30%, list=5%, signal=32%
GO_REGULATION_OF_GROWTH_HORMONE_RECEPTOR_SIGNALING_PATHWAY	GO_REGULATION_OF_GROWTH_HORMONE_RECEPTOR_SIGNALING_PATHWAY		5	0.7298515	1.4229419	0.079566	0.27816042	1	1419	tags=40%, list=3%, signal=41%
GO_REGULATION_OF_CHEMOKINE_C_X_C_MOTIF_LIGAND_2_PRODUCTION	GO_REGULATION_OF_CHEMOKINE_C_X_C_MOTIF_LIGAND_2_PRODUCTION		10	0.5832399	1.4226955	0.1042471	0.27829286	1	4333	tags=50%, list=8%, signal=54%
GO_REGULATION_OF_SYNAPTIC_VESICLE_CLUSTERING	GO_REGULATION_OF_SYNAPTIC_VESICLE_CLUSTERING		9	0.66264427	1.422527	0.10193322	0.27836615	1	3948	tags=33%, list=7%, signal=36%
GO_NOREPINEPHRINE_BIOSYNTHETIC_PROCESS	GO_NOREPINEPHRINE_BIOSYNTHETIC_PROCESS		7	0.68597937	1.4220877	0.08126037	0.27888846	1	8497	tags=71%, list=15%, signal=84%
GO_CELL_PROLIFERATION_IN_BONE_MARROW	GO_CELL_PROLIFERATION_IN_BONE_MARROW		10	0.5922266	1.4220396	0.08797128	0.27875322	1	7751	tags=50%, list=14%, signal=58%
GO_NEGATIVE_REGULATION_OF_LOCOMOTION	GO_NEGATIVE_REGULATION_OF_LOCOMOTION		364	0.3675296	1.4214588	0.06469501	0.27944288	1	8915	tags=28%, list=16%, signal=34%
GO_ADENYLATE_CYCLASE_INHIBITING_G_PROTEIN_COUPLED_RECEPTOR_SIGNALING_PATHWAY	GO_ADENYLATE_CYCLASE_INHIBITING_G_PROTEIN_COUPLED_RECEPTOR_SIGNALING_PATHWAY		87	0.4238788	1.4214396	0.06462035	0.27925158	1	16620	tags=48%, list=30%, signal=69%
GO_POSITIVE_REGULATION_OF_PROTEIN_KINASE_B_SIGNALING	GO_POSITIVE_REGULATION_OF_PROTEIN_KINASE_B_SIGNALING		172	0.40112865	1.4195619	0.06445993	0.28219888	1	6289	tags=26%, list=11%, signal=29%
GO_REGULATION_OF_EPIDERMAL_CELL_DIFFERENTIATION	GO_REGULATION_OF_EPIDERMAL_CELL_DIFFERENTIATION		59	0.4176211	1.419018	0.054744527	0.28289407	1	15514	tags=44%, list=28%, signal=61%
GO_CELLULAR_RESPONSE_TO_VIRUS	GO_CELLULAR_RESPONSE_TO_VIRUS		50	0.43512854	1.418749	0.06989247	0.28312796	1	6876	tags=36%, list=12%, signal=41%
GO_CELLULAR_RESPONSE_TO_REACTIVE_NITROGEN_SPECIES	GO_CELLULAR_RESPONSE_TO_REACTIVE_NITROGEN_SPECIES		19	0.5358738	1.4179363	0.08901515	0.28429866	1	5613	tags=37%, list=10%, signal=41%
GO_NEGATIVE_REGULATION_OF_TOLL_LIKE_RECEPTOR_4_SIGNALING_PATHWAY	GO_NEGATIVE_REGULATION_OF_TOLL_LIKE_RECEPTOR_4_SIGNALING_PATHWAY		9	0.62051755	1.4178051	0.09841828	0.28429544	1	15091	tags=67%, list=27%, signal=92%
GO_REGULATION_OF_G_PROTEIN_COUPLED_RECEPTOR_SIGNALING_PATHWAY	GO_REGULATION_OF_G_PROTEIN_COUPLED_RECEPTOR_SIGNALING_PATHWAY		146	0.38306463	1.4175979	0.05922166	0.28445444	1	12202	tags=38%, list=22%, signal=48%
GO_ICOSANOID_METABOLIC_PROCESS	GO_ICOSANOID_METABOLIC_PROCESS		81	0.42617214	1.4172347	0.06993007	0.28481445	1	6385	tags=27%, list=12%, signal=31%
GO_ANAGEN	GO_ANAGEN		5	0.73467207	1.4170877	0.07590133	0.28482527	1	320	tags=20%, list=1%, signal=20%
GO_DETECTION_OF_MECHANICAL_STIMULUS_INVOLVED_IN_SENSORY_PERCEPTION_OF_PAIN	GO_DETECTION_OF_MECHANICAL_STIMULUS_INVOLVED_IN_SENSORY_PERCEPTION_OF_PAIN		12	0.60095614	1.4168605	0.10746812	0.28497404	1	10316	tags=50%, list=19%, signal=61%
GO_PHOSPHATIDYLCHOLINE_METABOLIC_PROCESS	GO_PHOSPHATIDYLCHOLINE_METABOLIC_PROCESS		37	0.4343034	1.416301	0.050736498	0.28572154	1	10955	tags=38%, list=20%, signal=47%
GO_METANEPHRIC_NEPHRON_TUBULE_MORPHOGENESIS	GO_METANEPHRIC_NEPHRON_TUBULE_MORPHOGENESIS		8	0.6581653	1.4161783	0.09010601	0.285724	1	13750	tags=63%, list=25%, signal=83%
GO_PROTEIN_LOCALIZATION_TO_ENDOSOME	GO_PROTEIN_LOCALIZATION_TO_ENDOSOME		24	0.51485294	1.4160402	0.114754096	0.2857328	1	5645	tags=33%, list=10%, signal=37%
GO_REGULATION_OF_HEMATOPOIETIC_STEM_CELL_PROLIFERATION	GO_REGULATION_OF_HEMATOPOIETIC_STEM_CELL_PROLIFERATION		9	0.59356064	1.4148761	0.07918969	0.28745762	1	3914	tags=33%, list=7%, signal=36%
GO_RESPONSE_TO_ALCOHOL	GO_RESPONSE_TO_ALCOHOL		234	0.37270194	1.4143957	0.056198347	0.28802985	1	8857	tags=27%, list=16%, signal=32%
GO_REGULATION_OF_NUCLEAR_CELL_CYCLE_DNA_REPLICATION	GO_REGULATION_OF_NUCLEAR_CELL_CYCLE_DNA_REPLICATION		16	0.59149677	1.4133912	0.1005386	0.2895791	1	4715	tags=25%, list=9%, signal=27%
GO_CARDIAC_MUSCLE_CELL_MYOBLAST_DIFFERENTIATION	GO_CARDIAC_MUSCLE_CELL_MYOBLAST_DIFFERENTIATION		11	0.5924428	1.4125873	0.09981851	0.2907229	1	3709	tags=36%, list=7%, signal=39%
GO_LONG_CHAIN_FATTY_ACID_METABOLIC_PROCESS	GO_LONG_CHAIN_FATTY_ACID_METABOLIC_PROCESS		86	0.4018642	1.4124374	0.05308219	0.29073706	1	11370	tags=35%, list=21%, signal=44%
GO_REGULATION_OF_CORE_PROMOTER_BINDING	GO_REGULATION_OF_CORE_PROMOTER_BINDING		8	0.60326636	1.4122041	0.094642855	0.2909189	1	951	tags=25%, list=2%, signal=25%
GO_RESPONSE_TO_BRONCHODILATOR	GO_RESPONSE_TO_BRONCHODILATOR		52	0.47153836	1.4120352	0.09326425	0.2909667	1	6225	tags=33%, list=11%, signal=37%
GO_POSITIVE_REGULATION_OF_ISOTYPE_SWITCHING	GO_POSITIVE_REGULATION_OF_ISOTYPE_SWITCHING		26	0.53352404	1.4117386	0.12637363	0.29122996	1	14719	tags=62%, list=27%, signal=84%
GO_APOPTOTIC_PROCESS_INVOLVED_IN_DEVELOPMENT	GO_APOPTOTIC_PROCESS_INVOLVED_IN_DEVELOPMENT		35	0.4721569	1.4112306	0.08793104	0.29186687	1	9187	tags=37%, list=17%, signal=45%
GO_POSITIVE_REGULATION_OF_OSTEOBLAST_PROLIFERATION	GO_POSITIVE_REGULATION_OF_OSTEOBLAST_PROLIFERATION		10	0.63187146	1.4111537	0.107407406	0.29177848	1	10259	tags=60%, list=19%, signal=74%
GO_NEGATIVE_REGULATION_OF_MACROPHAGE_MIGRATION	GO_NEGATIVE_REGULATION_OF_MACROPHAGE_MIGRATION		10	0.6145304	1.4107612	0.08925319	0.2922946	1	4605	tags=50%, list=8%, signal=55%
GO_ACTIVATION_OF_MAPK_ACTIVITY	GO_ACTIVATION_OF_MAPK_ACTIVITY		152	0.37745672	1.4100984	0.062394604	0.2932585	1	9166	tags=30%, list=17%, signal=36%
GO_MELANOCYTE_DIFFERENTIATION	GO_MELANOCYTE_DIFFERENTIATION		24	0.5161548	1.4100465	0.07476635	0.29310325	1	4571	tags=33%, list=8%, signal=36%
GO_NEGATIVE_REGULATION_OF_CELL_MOTILITY	GO_NEGATIVE_REGULATION_OF_CELL_MOTILITY		317	0.36295286	1.4100204	0.07441016	0.29291618	1	8915	tags=27%, list=16%, signal=33%
GO_EMBRYONIC_RETINA_MORPHOGENESIS_IN_CAMERA_TYPE_EYE	GO_EMBRYONIC_RETINA_MORPHOGENESIS_IN_CAMERA_TYPE_EYE		7	0.699891	1.4093218	0.08768657	0.29394165	1	3457	tags=57%, list=6%, signal=61%
GO_T_HELPER_2_CELL_CYTOKINE_PRODUCTION	GO_T_HELPER_2_CELL_CYTOKINE_PRODUCTION		13	0.5715553	1.4091048	0.0866426	0.29408848	1	8497	tags=46%, list=15%, signal=55%
GO_POSITIVE_REGULATION_OF_RIG_I_SIGNALING_PATHWAY	GO_POSITIVE_REGULATION_OF_RIG_I_SIGNALING_PATHWAY		8	0.65460694	1.4088986	0.10037879	0.2941887	1	4969	tags=50%, list=9%, signal=55%
GO_AMMONIUM_TRANSMEMBRANE_TRANSPORT	GO_AMMONIUM_TRANSMEMBRANE_TRANSPORT		16	0.5252148	1.4086864	0.06998445	0.29434538	1	10897	tags=50%, list=20%, signal=62%
GO_CELLULAR_RESPONSE_TO_LOW_DENSITY_LIPOPROTEIN_PARTICLE_STIMULUS	GO_CELLULAR_RESPONSE_TO_LOW_DENSITY_LIPOPROTEIN_PARTICLE_STIMULUS		20	0.50853914	1.4084681	0.11524164	0.294477	1	3291	tags=30%, list=6%, signal=32%
GO_CELLULAR_RESPONSE_TO_EXTERNAL_STIMULUS	GO_CELLULAR_RESPONSE_TO_EXTERNAL_STIMULUS		334	0.3581738	1.4081249	0.06666667	0.29486826	1	7008	tags=24%, list=13%, signal=28%
GO_POSITIVE_REGULATION_OF_MYELOID_LEUKOCYTE_CYTOKINE_PRODUCTION_INVOLVED_IN_IMMUNE_RESPONSE	GO_POSITIVE_REGULATION_OF_MYELOID_LEUKOCYTE_CYTOKINE_PRODUCTION_INVOLVED_IN_IMMUNE_RESPONSE		19	0.51928586	1.407691	0.09981167	0.29540893	1	4521	tags=37%, list=8%, signal=40%
GO_CAMP_CATABOLIC_PROCESS	GO_CAMP_CATABOLIC_PROCESS		8	0.6459011	1.4076477	0.09689214	0.2952535	1	5891	tags=38%, list=11%, signal=42%
GO_POSITIVE_REGULATION_OF_PROTEIN_MODIFICATION_PROCESS	GO_POSITIVE_REGULATION_OF_PROTEIN_MODIFICATION_PROCESS		1205	0.3454942	1.4067426	0.066433564	0.29656073	1	7435	tags=25%, list=13%, signal=28%
GO_STRIATED_MUSCLE_CELL_PROLIFERATION	GO_STRIATED_MUSCLE_CELL_PROLIFERATION		78	0.4326974	1.4066865	0.06981132	0.29642385	1	11340	tags=37%, list=21%, signal=47%
GO_NEGATIVE_REGULATION_OF_MAP_KINASE_ACTIVITY	GO_NEGATIVE_REGULATION_OF_MAP_KINASE_ACTIVITY		75	0.38918722	1.406487	0.084990956	0.29654428	1	9851	tags=31%, list=18%, signal=37%
GO_REGULATION_OF_SYSTEMIC_ARTERIAL_BLOOD_PRESSURE_BY_ENDOTHELIN	GO_REGULATION_OF_SYSTEMIC_ARTERIAL_BLOOD_PRESSURE_BY_ENDOTHELIN		6	0.66925657	1.4061031	0.0858209	0.29699063	1	12045	tags=50%, list=22%, signal=64%
GO_REGULATION_OF_NON_MEMBRANE_SPANNING_PROTEIN_TYROSINE_KINASE_ACTIVITY	GO_REGULATION_OF_NON_MEMBRANE_SPANNING_PROTEIN_TYROSINE_KINASE_ACTIVITY		8	0.6259658	1.4057958	0.08900524	0.2972917	1	4634	tags=38%, list=8%, signal=41%
GO_DENDRITIC_CELL_APOPTOTIC_PROCESS	GO_DENDRITIC_CELL_APOPTOTIC_PROCESS		10	0.68315893	1.4056413	0.11882998	0.29734105	1	8158	tags=70%, list=15%, signal=82%
GO_SOMATOSTATIN_RECEPTOR_SIGNALING_PATHWAY	GO_SOMATOSTATIN_RECEPTOR_SIGNALING_PATHWAY		5	0.75437623	1.405237	0.094642855	0.2978187	1	2957	tags=40%, list=5%, signal=42%
GO_NEGATIVE_REGULATION_OF_ANIMAL_ORGAN_MORPHOGENESIS	GO_NEGATIVE_REGULATION_OF_ANIMAL_ORGAN_MORPHOGENESIS		33	0.485791	1.4050189	0.0834753	0.2979801	1	8497	tags=33%, list=15%, signal=39%
GO_NEUTROPHIL_MEDIATED_KILLING_OF_SYMBIONT_CELL	GO_NEUTROPHIL_MEDIATED_KILLING_OF_SYMBIONT_CELL		8	0.6170183	1.4046628	0.08688245	0.29838508	1	6358	tags=38%, list=12%, signal=42%
GO_REGULATION_OF_MEMBRANE_LIPID_DISTRIBUTION	GO_REGULATION_OF_MEMBRANE_LIPID_DISTRIBUTION		46	0.42634514	1.4044137	0.08623853	0.29856429	1	9368	tags=39%, list=17%, signal=47%
GO_SERTOLI_CELL_DEVELOPMENT	GO_SERTOLI_CELL_DEVELOPMENT		14	0.55370533	1.4041914	0.10865562	0.2987422	1	6532	tags=50%, list=12%, signal=57%
GO_REGULATION_OF_WATER_LOSS_VIA_SKIN	GO_REGULATION_OF_WATER_LOSS_VIA_SKIN		24	0.56960475	1.4041569	0.13498099	0.2985747	1	6223	tags=46%, list=11%, signal=52%
GO_NEGATIVE_REGULATION_OF_PROTEIN_K63_LINKED_UBIQUITINATION	GO_NEGATIVE_REGULATION_OF_PROTEIN_K63_LINKED_UBIQUITINATION		8	0.5873113	1.4040618	0.08070866	0.2984927	1	8226	tags=63%, list=15%, signal=73%
GO_REGULATION_OF_NATURAL_KILLER_CELL_DIFFERENTIATION_INVOLVED_IN_IMMUNE_RESPONSE	GO_REGULATION_OF_NATURAL_KILLER_CELL_DIFFERENTIATION_INVOLVED_IN_IMMUNE_RESPONSE		5	0.75099653	1.4040306	0.08287293	0.29832047	1	4922	tags=60%, list=9%, signal=66%
GO_POSITIVE_REGULATION_OF_BLOOD_VESSEL_ENDOTHELIAL_CELL_PROLIFERATION_INVOLVED_IN_SPROUTING_ANGIOGENESIS	GO_POSITIVE_REGULATION_OF_BLOOD_VESSEL_ENDOTHELIAL_CELL_PROLIFERATION_INVOLVED_IN_SPROUTING_ANGIOGENESIS		20	0.49803263	1.403809	0.09417808	0.29847208	1	8434	tags=35%, list=15%, signal=41%
GO_HAIR_CELL_DIFFERENTIATION	GO_HAIR_CELL_DIFFERENTIATION		39	0.43106416	1.4034696	0.06491228	0.29883006	1	11400	tags=36%, list=21%, signal=45%
GO_VERY_LONG_CHAIN_FATTY_ACID_METABOLIC_PROCESS	GO_VERY_LONG_CHAIN_FATTY_ACID_METABOLIC_PROCESS		13	0.570452	1.4020191	0.11111111	0.30109835	1	7509	tags=46%, list=14%, signal=53%
GO_CALCIUM_ION_TRANSMEMBRANE_IMPORT_INTO_CYTOSOL	GO_CALCIUM_ION_TRANSMEMBRANE_IMPORT_INTO_CYTOSOL		136	0.41336814	1.4018972	0.10291595	0.30108842	1	6544	tags=26%, list=12%, signal=30%
GO_ENDOCARDIUM_MORPHOGENESIS	GO_ENDOCARDIUM_MORPHOGENESIS		6	0.6833539	1.4013315	0.107344635	0.30184346	1	3709	tags=50%, list=7%, signal=54%
GO_NEUTROPHIL_APOPTOTIC_PROCESS	GO_NEUTROPHIL_APOPTOTIC_PROCESS		8	0.638837	1.4011534	0.12730627	0.301926	1	9863	tags=63%, list=18%, signal=76%
GO_ANIMAL_ORGAN_MATURATION	GO_ANIMAL_ORGAN_MATURATION		25	0.5140704	1.4004618	0.1208981	0.3028734	1	8497	tags=36%, list=15%, signal=43%
GO_ESTABLISHMENT_OF_EPITHELIAL_CELL_POLARITY	GO_ESTABLISHMENT_OF_EPITHELIAL_CELL_POLARITY		29	0.45515043	1.3997272	0.085436895	0.3038717	1	8014	tags=34%, list=15%, signal=40%
GO_POSITIVE_REGULATION_OF_MOLECULAR_FUNCTION	GO_POSITIVE_REGULATION_OF_MOLECULAR_FUNCTION		1738	0.3514209	1.3996526	0.07155635	0.3037832	1	9187	tags=28%, list=17%, signal=33%
GO_REGULATION_OF_SUPEROXIDE_METABOLIC_PROCESS	GO_REGULATION_OF_SUPEROXIDE_METABOLIC_PROCESS		33	0.445366	1.3992535	0.07936508	0.3042471	1	8566	tags=33%, list=16%, signal=39%
GO_REGULATION_OF_DIGESTIVE_SYSTEM_PROCESS	GO_REGULATION_OF_DIGESTIVE_SYSTEM_PROCESS		40	0.4561407	1.3992267	0.05967742	0.3040504	1	4980	tags=28%, list=9%, signal=30%
GO_NEGATIVE_REGULATION_OF_NOREPINEPHRINE_SECRETION	GO_NEGATIVE_REGULATION_OF_NOREPINEPHRINE_SECRETION		8	0.62477463	1.399187	0.1	0.30388197	1	4672	tags=38%, list=8%, signal=41%
GO_NEGATIVE_REGULATION_OF_SISTER_CHROMATID_COHESION	GO_NEGATIVE_REGULATION_OF_SISTER_CHROMATID_COHESION		5	0.71225923	1.3991748	0.09469697	0.30367094	1	8737	tags=80%, list=16%, signal=95%
GO_NEGATIVE_REGULATION_OF_VASCULAR_ASSOCIATED_SMOOTH_MUSCLE_CELL_APOPTOTIC_PROCESS	GO_NEGATIVE_REGULATION_OF_VASCULAR_ASSOCIATED_SMOOTH_MUSCLE_CELL_APOPTOTIC_PROCESS		5	0.6863899	1.3985517	0.0689013	0.3045575	1	8873	tags=60%, list=16%, signal=71%
GO_POSITIVE_REGULATION_OF_VASCULAR_ENDOTHELIAL_GROWTH_FACTOR_PRODUCTION	GO_POSITIVE_REGULATION_OF_VASCULAR_ENDOTHELIAL_GROWTH_FACTOR_PRODUCTION		26	0.48115778	1.3973863	0.096834265	0.30642852	1	7797	tags=38%, list=14%, signal=45%
GO_THIAMINE_CONTAINING_COMPOUND_METABOLIC_PROCESS	GO_THIAMINE_CONTAINING_COMPOUND_METABOLIC_PROCESS		7	0.65730816	1.396944	0.09393346	0.3069931	1	4227	tags=43%, list=8%, signal=46%
GO_SYNCYTIUM_FORMATION	GO_SYNCYTIUM_FORMATION		55	0.4495567	1.3941994	0.081850536	0.31150517	1	4414	tags=25%, list=8%, signal=28%
GO_ESTABLISHMENT_OF_SISTER_CHROMATID_COHESION	GO_ESTABLISHMENT_OF_SISTER_CHROMATID_COHESION		10	0.62324154	1.3941509	0.13018867	0.3113555	1	10008	tags=60%, list=18%, signal=73%
GO_SEMINIFEROUS_TUBULE_DEVELOPMENT	GO_SEMINIFEROUS_TUBULE_DEVELOPMENT		12	0.5897655	1.3933133	0.13653137	0.31260905	1	7360	tags=42%, list=13%, signal=48%
GO_AORTIC_VALVE_DEVELOPMENT	GO_AORTIC_VALVE_DEVELOPMENT		27	0.52427375	1.3932558	0.10114504	0.3124874	1	12249	tags=52%, list=22%, signal=67%
GO_METAL_ION_HOMEOSTASIS	GO_METAL_ION_HOMEOSTASIS		652	0.3569666	1.3925365	0.071192056	0.31358027	1	6225	tags=23%, list=11%, signal=25%
GO_ANTIGEN_PROCESSING_AND_PRESENTATION_OF_ENDOGENOUS_ANTIGEN	GO_ANTIGEN_PROCESSING_AND_PRESENTATION_OF_ENDOGENOUS_ANTIGEN		21	0.6084599	1.3921052	0.168	0.3141274	1	9433	tags=57%, list=17%, signal=69%
GO_REGULATION_OF_POTASSIUM_ION_IMPORT	GO_REGULATION_OF_POTASSIUM_ION_IMPORT		8	0.65164644	1.3918184	0.09867173	0.31441876	1	9631	tags=63%, list=17%, signal=76%
GO_REGULATION_OF_PHOSPHOLIPASE_ACTIVITY	GO_REGULATION_OF_PHOSPHOLIPASE_ACTIVITY		69	0.4327049	1.3915355	0.091240875	0.31468892	1	14833	tags=46%, list=27%, signal=63%
GO_POSITIVE_REGULATION_OF_LIPID_METABOLIC_PROCESS	GO_POSITIVE_REGULATION_OF_LIPID_METABOLIC_PROCESS		136	0.38896674	1.3910787	0.073426574	0.31527132	1	12444	tags=33%, list=23%, signal=43%
GO_CELL_CELL_RECOGNITION	GO_CELL_CELL_RECOGNITION		73	0.3975988	1.3906753	0.055910543	0.31575635	1	2052	tags=16%, list=4%, signal=17%
GO_COPPER_ION_TRANSMEMBRANE_TRANSPORT	GO_COPPER_ION_TRANSMEMBRANE_TRANSPORT		6	0.6567118	1.3901682	0.1027668	0.31645975	1	15362	tags=67%, list=28%, signal=92%
GO_POSITIVE_REGULATION_OF_MICROGLIAL_CELL_MIGRATION	GO_POSITIVE_REGULATION_OF_MICROGLIAL_CELL_MIGRATION		5	0.7550838	1.3895997	0.10059172	0.31724486	1	2008	tags=40%, list=4%, signal=42%
GO_REGULATION_OF_MODIFICATION_OF_POSTSYNAPTIC_STRUCTURE	GO_REGULATION_OF_MODIFICATION_OF_POSTSYNAPTIC_STRUCTURE		6	0.7087157	1.3895272	0.11047619	0.3171343	1	5731	tags=50%, list=10%, signal=56%
GO_POSITIVE_REGULATION_OF_CELL_DEATH	GO_POSITIVE_REGULATION_OF_CELL_DEATH		693	0.33472428	1.3888642	0.073608615	0.31807467	1	8772	tags=27%, list=16%, signal=32%
GO_LYMPHOCYTE_ANERGY	GO_LYMPHOCYTE_ANERGY		5	0.7449949	1.3885639	0.11978222	0.31838432	1	5255	tags=60%, list=10%, signal=66%
GO_T_CELL_ANTIGEN_PROCESSING_AND_PRESENTATION	GO_T_CELL_ANTIGEN_PROCESSING_AND_PRESENTATION		5	0.79459393	1.3884566	0.09823183	0.31834292	1	1254	tags=40%, list=2%, signal=41%
GO_NEGATIVE_REGULATION_OF_PROTEIN_POLYUBIQUITINATION	GO_NEGATIVE_REGULATION_OF_PROTEIN_POLYUBIQUITINATION		10	0.5541545	1.38738	0.10666667	0.3199951	1	8226	tags=50%, list=15%, signal=59%
GO_NEGATIVE_REGULATION_OF_SMOOTHENED_SIGNALING_PATHWAY	GO_NEGATIVE_REGULATION_OF_SMOOTHENED_SIGNALING_PATHWAY		29	0.48357627	1.387038	0.123188406	0.32036734	1	11840	tags=45%, list=21%, signal=57%
GO_CELLULAR_RESPONSE_TO_ANTIBIOTIC	GO_CELLULAR_RESPONSE_TO_ANTIBIOTIC		138	0.37055007	1.3869634	0.07832423	0.32028672	1	7624	tags=31%, list=14%, signal=36%
GO_HISTONE_H3_K9_MODIFICATION	GO_HISTONE_H3_K9_MODIFICATION		48	0.48632213	1.3865918	0.14498141	0.320731	1	15347	tags=58%, list=28%, signal=81%
GO_REGULATION_OF_CLATHRIN_DEPENDENT_ENDOCYTOSIS	GO_REGULATION_OF_CLATHRIN_DEPENDENT_ENDOCYTOSIS		16	0.5348167	1.3863627	0.111753374	0.320907	1	4980	tags=38%, list=9%, signal=41%
GO_MORPHOGENESIS_OF_AN_ENDOTHELIUM	GO_MORPHOGENESIS_OF_AN_ENDOTHELIUM		15	0.5547983	1.3861833	0.12878788	0.32101142	1	5012	tags=33%, list=9%, signal=37%
GO_CERAMIDE_TRANSPORT	GO_CERAMIDE_TRANSPORT		11	0.55401707	1.3856443	0.10536399	0.3217763	1	4600	tags=36%, list=8%, signal=40%
GO_CELLULAR_ION_HOMEOSTASIS	GO_CELLULAR_ION_HOMEOSTASIS		660	0.3499974	1.3853455	0.06478405	0.3220738	1	6551	tags=23%, list=12%, signal=25%
GO_POSITIVE_REGULATION_OF_FATTY_ACID_BETA_OXIDATION	GO_POSITIVE_REGULATION_OF_FATTY_ACID_BETA_OXIDATION		10	0.56200975	1.3851683	0.09829868	0.32214126	1	356	tags=10%, list=1%, signal=10%
GO_REGULATION_OF_PRODUCTION_OF_SMALL_RNA_INVOLVED_IN_GENE_SILENCING_BY_RNA	GO_REGULATION_OF_PRODUCTION_OF_SMALL_RNA_INVOLVED_IN_GENE_SILENCING_BY_RNA		20	0.5064895	1.3851174	0.13120568	0.32199404	1	5324	tags=35%, list=10%, signal=39%
GO_INTERLEUKIN_1_ALPHA_PRODUCTION	GO_INTERLEUKIN_1_ALPHA_PRODUCTION		7	0.63513154	1.3850607	0.09498208	0.32184967	1	4071	tags=57%, list=7%, signal=62%
GO_MULTINUCLEAR_OSTEOCLAST_DIFFERENTIATION	GO_MULTINUCLEAR_OSTEOCLAST_DIFFERENTIATION		7	0.6288802	1.3849732	0.11764706	0.32177198	1	1518	tags=29%, list=3%, signal=29%
GO_ASTROCYTE_CELL_MIGRATION	GO_ASTROCYTE_CELL_MIGRATION		8	0.65635437	1.3847526	0.13127413	0.3219262	1	8589	tags=63%, list=16%, signal=74%
GO_REGULATION_OF_FLAGELLATED_SPERM_MOTILITY	GO_REGULATION_OF_FLAGELLATED_SPERM_MOTILITY		17	0.5025445	1.3845493	0.08006279	0.32207984	1	2018	tags=24%, list=4%, signal=24%
GO_POSITIVE_REGULATION_OF_FAT_CELL_DIFFERENTIATION	GO_POSITIVE_REGULATION_OF_FAT_CELL_DIFFERENTIATION		61	0.40979305	1.3844393	0.09058615	0.32205233	1	6374	tags=23%, list=12%, signal=26%
GO_NEGATIVE_REGULATION_OF_NEURON_MIGRATION	GO_NEGATIVE_REGULATION_OF_NEURON_MIGRATION		12	0.5711923	1.3841506	0.10845588	0.3223449	1	8807	tags=50%, list=16%, signal=59%
GO_REGULATION_OF_CELLULAR_PH_REDUCTION	GO_REGULATION_OF_CELLULAR_PH_REDUCTION		5	0.7000797	1.3841455	0.085365854	0.32211426	1	2203	tags=40%, list=4%, signal=42%
GO_REGULATION_OF_REGULATED_SECRETORY_PATHWAY	GO_REGULATION_OF_REGULATED_SECRETORY_PATHWAY		159	0.3902791	1.3839874	0.078397214	0.32214645	1	4644	tags=24%, list=8%, signal=26%
GO_T_HELPER_2_CELL_DIFFERENTIATION	GO_T_HELPER_2_CELL_DIFFERENTIATION		14	0.5217028	1.3838872	0.11970534	0.32208607	1	8497	tags=50%, list=15%, signal=59%
GO_OMEGA_HYDROXYLASE_P450_PATHWAY	GO_OMEGA_HYDROXYLASE_P450_PATHWAY		9	0.6273486	1.3838085	0.1097561	0.32198772	1	11370	tags=56%, list=21%, signal=70%
GO_ORNITHINE_TRANSPORT	GO_ORNITHINE_TRANSPORT		6	0.65838695	1.3835726	0.0961183	0.32220113	1	9768	tags=50%, list=18%, signal=61%
GO_CELLULAR_RESPONSE_TO_OXYGEN_CONTAINING_COMPOUND	GO_CELLULAR_RESPONSE_TO_OXYGEN_CONTAINING_COMPOUND		1111	0.33945578	1.3834851	0.0745234	0.32214013	1	7432	tags=24%, list=13%, signal=27%
GO_POSITIVE_REGULATION_OF_ANION_TRANSMEMBRANE_TRANSPORT	GO_POSITIVE_REGULATION_OF_ANION_TRANSMEMBRANE_TRANSPORT		8	0.61552644	1.3834543	0.09751434	0.32196796	1	6328	tags=50%, list=11%, signal=56%
GO_NEGATIVE_REGULATION_OF_INTERLEUKIN_6_BIOSYNTHETIC_PROCESS	GO_NEGATIVE_REGULATION_OF_INTERLEUKIN_6_BIOSYNTHETIC_PROCESS		5	0.7190358	1.3823668	0.10229277	0.32372865	1	1419	tags=40%, list=3%, signal=41%
GO_PULMONARY_VALVE_DEVELOPMENT	GO_PULMONARY_VALVE_DEVELOPMENT		19	0.56191105	1.3821957	0.13926499	0.3238012	1	14795	tags=47%, list=27%, signal=65%
GO_POTASSIUM_ION_HOMEOSTASIS	GO_POTASSIUM_ION_HOMEOSTASIS		29	0.48026368	1.3818494	0.098497495	0.32415894	1	5838	tags=28%, list=11%, signal=31%
GO_REGULATION_OF_MYOSIN_LIGHT_CHAIN_PHOSPHATASE_ACTIVITY	GO_REGULATION_OF_MYOSIN_LIGHT_CHAIN_PHOSPHATASE_ACTIVITY		7	0.69222033	1.3815056	0.11576846	0.32458243	1	8345	tags=71%, list=15%, signal=84%
GO_INDOLE_CONTAINING_COMPOUND_METABOLIC_PROCESS	GO_INDOLE_CONTAINING_COMPOUND_METABOLIC_PROCESS		21	0.49588513	1.3813565	0.10516934	0.32461455	1	15354	tags=57%, list=28%, signal=79%
GO_NEGATIVE_REGULATION_OF_VIRAL_INDUCED_CYTOPLASMIC_PATTERN_RECOGNITION_RECEPTOR_SIGNALING_PATHWAY	GO_NEGATIVE_REGULATION_OF_VIRAL_INDUCED_CYTOPLASMIC_PATTERN_RECOGNITION_RECEPTOR_SIGNALING_PATHWAY		11	0.54498845	1.3810109	0.10789981	0.32503492	1	1614	tags=27%, list=3%, signal=28%
GO_ENTRAINMENT_OF_CIRCADIAN_CLOCK_BY_PHOTOPERIOD	GO_ENTRAINMENT_OF_CIRCADIAN_CLOCK_BY_PHOTOPERIOD		21	0.48621613	1.380589	0.11346154	0.32556656	1	8092	tags=33%, list=15%, signal=39%
GO_REGULATION_OF_BODY_FLUID_LEVELS	GO_REGULATION_OF_BODY_FLUID_LEVELS		499	0.3452489	1.3803221	0.07783418	0.32581756	1	6320	tags=23%, list=11%, signal=25%
GO_BONE_REMODELING	GO_BONE_REMODELING		83	0.41891024	1.3801913	0.10968921	0.32580957	1	5587	tags=23%, list=10%, signal=25%
GO_GLIAL_CELL_PROLIFERATION	GO_GLIAL_CELL_PROLIFERATION		48	0.43182126	1.379846	0.1122449	0.32621634	1	10512	tags=33%, list=19%, signal=41%
GO_UNSATURATED_FATTY_ACID_METABOLIC_PROCESS	GO_UNSATURATED_FATTY_ACID_METABOLIC_PROCESS		78	0.4109694	1.3798302	0.0882353	0.3260005	1	11370	tags=36%, list=21%, signal=45%
GO_REGULATION_OF_APOPTOTIC_PROCESS_INVOLVED_IN_MORPHOGENESIS	GO_REGULATION_OF_APOPTOTIC_PROCESS_INVOLVED_IN_MORPHOGENESIS		11	0.5562893	1.3798131	0.107081175	0.32579768	1	1476	tags=18%, list=3%, signal=19%
GO_REGULATION_OF_APOPTOTIC_PROCESS_INVOLVED_IN_DEVELOPMENT	GO_REGULATION_OF_APOPTOTIC_PROCESS_INVOLVED_IN_DEVELOPMENT		11	0.5562893	1.3798131	0.107081175	0.32555914	1	1476	tags=18%, list=3%, signal=19%
GO_REGULATION_OF_ESTABLISHMENT_OF_PROTEIN_LOCALIZATION	GO_REGULATION_OF_ESTABLISHMENT_OF_PROTEIN_LOCALIZATION		723	0.339274	1.3796808	0.07105719	0.32552764	1	9033	tags=27%, list=16%, signal=32%
GO_CORTICAL_CYTOSKELETON_ORGANIZATION	GO_CORTICAL_CYTOSKELETON_ORGANIZATION		46	0.43332762	1.3793098	0.115530305	0.3259706	1	5265	tags=28%, list=10%, signal=31%
GO_PHENOL_CONTAINING_COMPOUND_METABOLIC_PROCESS	GO_PHENOL_CONTAINING_COMPOUND_METABOLIC_PROCESS		60	0.42218554	1.3787897	0.1169687	0.32666653	1	8909	tags=37%, list=16%, signal=44%
GO_NEGATIVE_REGULATION_OF_DENDRITE_DEVELOPMENT	GO_NEGATIVE_REGULATION_OF_DENDRITE_DEVELOPMENT		26	0.47363093	1.3781365	0.12591241	0.32759708	1	4151	tags=27%, list=8%, signal=29%
GO_T_CELL_EXTRAVASATION	GO_T_CELL_EXTRAVASATION		8	0.6155486	1.3776865	0.13601533	0.3281643	1	4696	tags=38%, list=9%, signal=41%
GO_POSITIVE_REGULATION_OF_WOUND_HEALING	GO_POSITIVE_REGULATION_OF_WOUND_HEALING		56	0.41700864	1.377201	0.08362989	0.32880813	1	5781	tags=25%, list=10%, signal=28%
GO_REGULATION_OF_MYOBLAST_FUSION	GO_REGULATION_OF_MYOBLAST_FUSION		21	0.53639174	1.3769639	0.13676731	0.3290092	1	3384	tags=33%, list=6%, signal=35%
GO_CLATHRIN_COAT_ASSEMBLY	GO_CLATHRIN_COAT_ASSEMBLY		19	0.46065238	1.3765817	0.089147285	0.3294174	1	5227	tags=32%, list=9%, signal=35%
GO_NEGATIVE_REGULATION_OF_EPIDERMIS_DEVELOPMENT	GO_NEGATIVE_REGULATION_OF_EPIDERMIS_DEVELOPMENT		17	0.4811399	1.3764935	0.100548446	0.32932326	1	14237	tags=47%, list=26%, signal=63%
GO_ENDOTHELIAL_CELL_APOPTOTIC_PROCESS	GO_ENDOTHELIAL_CELL_APOPTOTIC_PROCESS		63	0.42053643	1.3756008	0.113553114	0.33066154	1	8705	tags=32%, list=16%, signal=38%
GO_INTERMEDIATE_FILAMENT_BUNDLE_ASSEMBLY	GO_INTERMEDIATE_FILAMENT_BUNDLE_ASSEMBLY		7	0.6681266	1.3754424	0.13819578	0.33070257	1	8832	tags=43%, list=16%, signal=51%
GO_NEGATIVE_REGULATION_OF_CELL_POPULATION_PROLIFERATION	GO_NEGATIVE_REGULATION_OF_CELL_POPULATION_PROLIFERATION		727	0.33639157	1.3753989	0.08900524	0.33053592	1	9215	tags=28%, list=17%, signal=33%
GO_POSITIVE_REGULATION_OF_PLASMA_MEMBRANE_BOUNDED_CELL_PROJECTION_ASSEMBLY	GO_POSITIVE_REGULATION_OF_PLASMA_MEMBRANE_BOUNDED_CELL_PROJECTION_ASSEMBLY		100	0.3705817	1.3752604	0.09929078	0.33054763	1	6216	tags=25%, list=11%, signal=28%
GO_REGULATION_OF_CELL_CYCLE_G1_S_PHASE_TRANSITION	GO_REGULATION_OF_CELL_CYCLE_G1_S_PHASE_TRANSITION		188	0.37520358	1.3751745	0.10018904	0.33046973	1	8092	tags=26%, list=15%, signal=30%
GO_APOPTOTIC_PROCESS_INVOLVED_IN_MORPHOGENESIS	GO_APOPTOTIC_PROCESS_INVOLVED_IN_MORPHOGENESIS		24	0.47972867	1.3751523	0.09413854	0.33026448	1	9187	tags=33%, list=17%, signal=40%
GO_VASCULOGENESIS_INVOLVED_IN_CORONARY_VASCULAR_MORPHOGENESIS	GO_VASCULOGENESIS_INVOLVED_IN_CORONARY_VASCULAR_MORPHOGENESIS		5	0.6728412	1.3741404	0.11439842	0.3318411	1	16506	tags=80%, list=30%, signal=114%
GO_NEGATIVE_REGULATION_OF_HEART_CONTRACTION	GO_NEGATIVE_REGULATION_OF_HEART_CONTRACTION		29	0.4806923	1.372787	0.14007092	0.3340368	1	5149	tags=24%, list=9%, signal=27%
GO_ESTABLISHMENT_OR_MAINTENANCE_OF_CELL_POLARITY	GO_ESTABLISHMENT_OR_MAINTENANCE_OF_CELL_POLARITY		205	0.37740806	1.372456	0.09227872	0.33443493	1	8591	tags=29%, list=16%, signal=35%
GO_REGULATION_OF_OXIDOREDUCTASE_ACTIVITY	GO_REGULATION_OF_OXIDOREDUCTASE_ACTIVITY		104	0.3599553	1.3722963	0.059900165	0.3344858	1	10029	tags=31%, list=18%, signal=38%
GO_POSITIVE_REGULATION_OF_HISTONE_H3_K9_METHYLATION	GO_POSITIVE_REGULATION_OF_HISTONE_H3_K9_METHYLATION		11	0.5606637	1.3722451	0.10193322	0.33434045	1	14852	tags=73%, list=27%, signal=99%
GO_VESTIBULOCOCHLEAR_NERVE_MORPHOGENESIS	GO_VESTIBULOCOCHLEAR_NERVE_MORPHOGENESIS		6	0.69804937	1.3715917	0.12371134	0.33532375	1	3805	tags=33%, list=7%, signal=36%
GO_ENTERIC_NERVOUS_SYSTEM_DEVELOPMENT	GO_ENTERIC_NERVOUS_SYSTEM_DEVELOPMENT		13	0.5836654	1.3715305	0.12802768	0.33519343	1	8064	tags=46%, list=15%, signal=54%
GO_NEGATIVE_REGULATION_OF_LIPOPROTEIN_PARTICLE_CLEARANCE	GO_NEGATIVE_REGULATION_OF_LIPOPROTEIN_PARTICLE_CLEARANCE		18	0.48214114	1.3707093	0.110074624	0.33647606	1	16126	tags=61%, list=29%, signal=86%
GO_PARKIN_MEDIATED_STIMULATION_OF_MITOPHAGY_IN_RESPONSE_TO_MITOCHONDRIAL_DEPOLARIZATION	GO_PARKIN_MEDIATED_STIMULATION_OF_MITOPHAGY_IN_RESPONSE_TO_MITOCHONDRIAL_DEPOLARIZATION		6	0.657518	1.3706317	0.13737373	0.33639446	1	6361	tags=33%, list=12%, signal=38%
GO_POSITIVE_REGULATION_OF_MACROAUTOPHAGY	GO_POSITIVE_REGULATION_OF_MACROAUTOPHAGY		67	0.4201031	1.3704764	0.13424124	0.3364153	1	7366	tags=30%, list=13%, signal=34%
GO_THYROID_HORMONE_GENERATION	GO_THYROID_HORMONE_GENERATION		16	0.521254	1.3701893	0.107081175	0.3366941	1	8497	tags=44%, list=15%, signal=52%
GO_REGULATION_OF_MELANOCYTE_DIFFERENTIATION	GO_REGULATION_OF_MELANOCYTE_DIFFERENTIATION		6	0.6596331	1.3700674	0.108411215	0.3366779	1	2997	tags=50%, list=5%, signal=53%
GO_REGULATION_OF_DNA_METHYLATION	GO_REGULATION_OF_DNA_METHYLATION		24	0.4992792	1.3700178	0.12891985	0.33652195	1	11673	tags=46%, list=21%, signal=58%
GO_PERISTALSIS	GO_PERISTALSIS		10	0.5956561	1.3692974	0.1323764	0.33761388	1	6225	tags=40%, list=11%, signal=45%
GO_NEGATIVE_REGULATION_OF_HUMORAL_IMMUNE_RESPONSE	GO_NEGATIVE_REGULATION_OF_HUMORAL_IMMUNE_RESPONSE		12	0.5972298	1.3692302	0.13043478	0.3374856	1	3545	tags=50%, list=6%, signal=53%
GO_NEGATIVE_REGULATION_OF_MONOCYTE_DIFFERENTIATION	GO_NEGATIVE_REGULATION_OF_MONOCYTE_DIFFERENTIATION		9	0.6063265	1.3685164	0.12762238	0.3385612	1	14011	tags=56%, list=25%, signal=74%
GO_RESPONSE_TO_PROSTAGLANDIN_E	GO_RESPONSE_TO_PROSTAGLANDIN_E		23	0.49394622	1.3683903	0.11806798	0.33855015	1	10236	tags=43%, list=19%, signal=53%
GO_REGULATION_OF_STORE_OPERATED_CALCIUM_CHANNEL_ACTIVITY	GO_REGULATION_OF_STORE_OPERATED_CALCIUM_CHANNEL_ACTIVITY		8	0.59367746	1.36772	0.11596958	0.3395274	1	8377	tags=50%, list=15%, signal=59%
GO_RUFFLE_ORGANIZATION	GO_RUFFLE_ORGANIZATION		52	0.3987501	1.3671263	0.075046904	0.34033537	1	6216	tags=27%, list=11%, signal=30%
GO_PROSTATE_GLANDULAR_ACINUS_DEVELOPMENT	GO_PROSTATE_GLANDULAR_ACINUS_DEVELOPMENT		11	0.5963119	1.3666254	0.13200723	0.341019	1	12612	tags=73%, list=23%, signal=94%
GO_MODIFICATION_OF_MORPHOLOGY_OR_PHYSIOLOGY_OF_OTHER_ORGANISM_INVOLVED_IN_SYMBIOTIC_INTERACTION	GO_MODIFICATION_OF_MORPHOLOGY_OR_PHYSIOLOGY_OF_OTHER_ORGANISM_INVOLVED_IN_SYMBIOTIC_INTERACTION		110	0.36127844	1.3665862	0.062166963	0.34085098	1	6358	tags=26%, list=12%, signal=30%
GO_RESPONSE_TO_ETHANOL	GO_RESPONSE_TO_ETHANOL		127	0.3766993	1.366484	0.084142394	0.34078243	1	5289	tags=20%, list=10%, signal=23%
GO_AGGRESSIVE_BEHAVIOR	GO_AGGRESSIVE_BEHAVIOR		8	0.65488976	1.3663968	0.10845588	0.34068245	1	15725	tags=75%, list=28%, signal=105%
GO_BLOOD_VESSEL_MORPHOGENESIS	GO_BLOOD_VESSEL_MORPHOGENESIS		646	0.36091357	1.3663653	0.12746859	0.34049487	1	9194	tags=28%, list=17%, signal=33%
GO_REGULATION_OF_CELLULAR_RESPONSE_TO_DRUG	GO_REGULATION_OF_CELLULAR_RESPONSE_TO_DRUG		25	0.4472278	1.3658438	0.10036496	0.34122863	1	7554	tags=44%, list=14%, signal=51%
GO_CELLULAR_RESPONSE_TO_HYDROGEN_PEROXIDE	GO_CELLULAR_RESPONSE_TO_HYDROGEN_PEROXIDE		90	0.37014902	1.3657063	0.07875458	0.34123588	1	7624	tags=32%, list=14%, signal=37%
GO_AXIS_ELONGATION_INVOLVED_IN_SOMITOGENESIS	GO_AXIS_ELONGATION_INVOLVED_IN_SOMITOGENESIS		5	0.72317725	1.3651166	0.11214953	0.34207043	1	3788	tags=60%, list=7%, signal=64%
GO_NUCLEOSIDE_CATABOLIC_PROCESS	GO_NUCLEOSIDE_CATABOLIC_PROCESS		32	0.456487	1.3648404	0.13120568	0.34233806	1	4326	tags=31%, list=8%, signal=34%
GO_POSITIVE_REGULATION_OF_LIPASE_ACTIVITY	GO_POSITIVE_REGULATION_OF_LIPASE_ACTIVITY		71	0.41309905	1.3644711	0.12607944	0.34275037	1	16105	tags=48%, list=29%, signal=68%
GO_BLOOD_VESSEL_ENDOTHELIAL_CELL_DIFFERENTIATION	GO_BLOOD_VESSEL_ENDOTHELIAL_CELL_DIFFERENTIATION		9	0.5864701	1.364249	0.13718411	0.34290338	1	3709	tags=33%, list=7%, signal=36%
GO_VASCULAR_ENDOTHELIAL_GROWTH_FACTOR_PRODUCTION	GO_VASCULAR_ENDOTHELIAL_GROWTH_FACTOR_PRODUCTION		32	0.45922294	1.3642274	0.11111111	0.34269708	1	5649	tags=31%, list=10%, signal=35%
GO_NEGATIVE_REGULATION_OF_VIRAL_ENTRY_INTO_HOST_CELL	GO_NEGATIVE_REGULATION_OF_VIRAL_ENTRY_INTO_HOST_CELL		19	0.49785042	1.3636631	0.10471204	0.3434717	1	7420	tags=37%, list=13%, signal=43%
GO_REGULATION_OF_CHOLESTEROL_METABOLIC_PROCESS	GO_REGULATION_OF_CHOLESTEROL_METABOLIC_PROCESS		14	0.5236694	1.3630197	0.12587413	0.34439006	1	16680	tags=64%, list=30%, signal=92%
GO_SMOOTHENED_SIGNALING_PATHWAY_INVOLVED_IN_VENTRAL_SPINAL_CORD_PATTERNING	GO_SMOOTHENED_SIGNALING_PATHWAY_INVOLVED_IN_VENTRAL_SPINAL_CORD_PATTERNING		7	0.6485401	1.3625437	0.11627907	0.3450613	1	11221	tags=57%, list=20%, signal=72%
GO_PROTEIN_PHOSPHORYLATION	GO_PROTEIN_PHOSPHORYLATION		1943	0.33719987	1.3615794	0.09265734	0.34661347	1	7751	tags=24%, list=14%, signal=27%
GO_HYALURONAN_METABOLIC_PROCESS	GO_HYALURONAN_METABOLIC_PROCESS		11	0.57665956	1.3610873	0.12237762	0.3472425	1	4991	tags=36%, list=9%, signal=40%
GO_GLYCEROL_TRANSPORT	GO_GLYCEROL_TRANSPORT		5	0.7288736	1.3600405	0.14980544	0.34889165	1	6715	tags=60%, list=12%, signal=68%
GO_POSITIVE_REGULATION_OF_TRANSFERASE_ACTIVITY	GO_POSITIVE_REGULATION_OF_TRANSFERASE_ACTIVITY		639	0.3482733	1.3600318	0.094736844	0.34866408	1	7764	tags=26%, list=14%, signal=30%
GO_GLIAL_CELL_DERIVED_NEUROTROPHIC_FACTOR_RECEPTOR_SIGNALING_PATHWAY	GO_GLIAL_CELL_DERIVED_NEUROTROPHIC_FACTOR_RECEPTOR_SIGNALING_PATHWAY		9	0.61298954	1.3591149	0.13133208	0.35005805	1	1659	tags=22%, list=3%, signal=23%
GO_INTERLEUKIN_5_PRODUCTION	GO_INTERLEUKIN_5_PRODUCTION		22	0.4753286	1.3588246	0.10823909	0.35035074	1	8822	tags=41%, list=16%, signal=49%
GO_REGULATION_OF_ANION_TRANSMEMBRANE_TRANSPORT	GO_REGULATION_OF_ANION_TRANSMEMBRANE_TRANSPORT		26	0.46664882	1.3582946	0.118421055	0.35108328	1	12095	tags=42%, list=22%, signal=54%
GO_MACROPHAGE_COLONY_STIMULATING_FACTOR_SIGNALING_PATHWAY	GO_MACROPHAGE_COLONY_STIMULATING_FACTOR_SIGNALING_PATHWAY		6	0.70073575	1.3577819	0.12915128	0.351798	1	10159	tags=83%, list=18%, signal=102%
GO_RESPONSE_TO_BACTERIAL_LIPOPROTEIN	GO_RESPONSE_TO_BACTERIAL_LIPOPROTEIN		7	0.65030265	1.3577694	0.14666666	0.35157397	1	4333	tags=57%, list=8%, signal=62%
GO_LEUKOTRIENE_METABOLIC_PROCESS	GO_LEUKOTRIENE_METABOLIC_PROCESS		15	0.5446136	1.3572072	0.13232514	0.3523308	1	4371	tags=27%, list=8%, signal=29%
GO_ACTIN_POLYMERIZATION_DEPENDENT_CELL_MOTILITY	GO_ACTIN_POLYMERIZATION_DEPENDENT_CELL_MOTILITY		6	0.65270805	1.3566796	0.12989691	0.35308334	1	961	tags=33%, list=2%, signal=34%
GO_NEGATIVE_REGULATION_OF_TRANSPORT	GO_NEGATIVE_REGULATION_OF_TRANSPORT		490	0.3325629	1.3566316	0.07192983	0.35292375	1	8924	tags=27%, list=16%, signal=31%
GO_POSITIVE_REGULATION_OF_MAPKKK_CASCADE_BY_FIBROBLAST_GROWTH_FACTOR_RECEPTOR_SIGNALING_PATHWAY	GO_POSITIVE_REGULATION_OF_MAPKKK_CASCADE_BY_FIBROBLAST_GROWTH_FACTOR_RECEPTOR_SIGNALING_PATHWAY		5	0.7072217	1.3562707	0.10526316	0.3533095	1	2391	tags=40%, list=4%, signal=42%
GO_ACTIN_NUCLEATION	GO_ACTIN_NUCLEATION		52	0.40552732	1.3557942	0.08560311	0.35393935	1	5927	tags=21%, list=11%, signal=24%
GO_RESPONSE_TO_HYDROPEROXIDE	GO_RESPONSE_TO_HYDROPEROXIDE		20	0.49024737	1.3555325	0.11151737	0.3541786	1	5558	tags=30%, list=10%, signal=33%
GO_POSITIVE_REGULATION_OF_I_KAPPAB_PHOSPHORYLATION	GO_POSITIVE_REGULATION_OF_I_KAPPAB_PHOSPHORYLATION		5	0.66930044	1.3552841	0.11962617	0.3543786	1	2938	tags=60%, list=5%, signal=63%
GO_UBIQUITIN_DEPENDENT_ENDOCYTOSIS	GO_UBIQUITIN_DEPENDENT_ENDOCYTOSIS		5	0.6952965	1.3551464	0.12889813	0.35443008	1	9237	tags=60%, list=17%, signal=72%
GO_STARTLE_RESPONSE	GO_STARTLE_RESPONSE		28	0.47131914	1.3547611	0.09913044	0.35493246	1	11257	tags=46%, list=20%, signal=58%
GO_REACTIVE_OXYGEN_SPECIES_METABOLIC_PROCESS	GO_REACTIVE_OXYGEN_SPECIES_METABOLIC_PROCESS		163	0.34646428	1.3546728	0.061564058	0.3548618	1	8612	tags=28%, list=16%, signal=33%
GO_REGULATION_OF_OSTEOCLAST_DEVELOPMENT	GO_REGULATION_OF_OSTEOCLAST_DEVELOPMENT		12	0.5866834	1.3546131	0.12730627	0.354727	1	3085	tags=33%, list=6%, signal=35%
GO_REGULATION_OF_GERMINAL_CENTER_FORMATION	GO_REGULATION_OF_GERMINAL_CENTER_FORMATION		9	0.57889	1.3542645	0.12704174	0.35515395	1	2020	tags=33%, list=4%, signal=35%
GO_GLYCEROPHOSPHOLIPID_METABOLIC_PROCESS	GO_GLYCEROPHOSPHOLIPID_METABOLIC_PROCESS		166	0.37392578	1.3541206	0.09981167	0.35518315	1	6043	tags=25%, list=11%, signal=28%
GO_PHOSPHATIDYLSERINE_METABOLIC_PROCESS	GO_PHOSPHATIDYLSERINE_METABOLIC_PROCESS		24	0.4686867	1.3541058	0.11753731	0.3549702	1	5449	tags=38%, list=10%, signal=42%
GO_ACTIN_FILAMENT_POLYMERIZATION	GO_ACTIN_FILAMENT_POLYMERIZATION		177	0.34829703	1.3539104	0.112280704	0.3550932	1	6820	tags=23%, list=12%, signal=26%
GO_POSITIVE_REGULATION_OF_HYPERSENSITIVITY	GO_POSITIVE_REGULATION_OF_HYPERSENSITIVITY		6	0.69052005	1.3535705	0.13706563	0.3555096	1	7459	tags=83%, list=14%, signal=96%
GO_POSITIVE_REGULATION_OF_ACTIN_NUCLEATION	GO_POSITIVE_REGULATION_OF_ACTIN_NUCLEATION		17	0.5313071	1.3532478	0.13535354	0.35586256	1	3770	tags=24%, list=7%, signal=25%
GO_PROTEIN_AUTO_ADP_RIBOSYLATION	GO_PROTEIN_AUTO_ADP_RIBOSYLATION		11	0.5724717	1.3532469	0.13487476	0.35561708	1	6703	tags=55%, list=12%, signal=62%
GO_HEMATOPOIETIC_STEM_CELL_PROLIFERATION	GO_HEMATOPOIETIC_STEM_CELL_PROLIFERATION		23	0.4971355	1.3532434	0.12455516	0.35537618	1	3914	tags=26%, list=7%, signal=28%
GO_NEGATIVE_REGULATION_OF_TORC1_SIGNALING	GO_NEGATIVE_REGULATION_OF_TORC1_SIGNALING		16	0.5019673	1.353092	0.11854684	0.35542312	1	4242	tags=31%, list=8%, signal=34%
GO_VERY_LONG_CHAIN_FATTY_ACID_CATABOLIC_PROCESS	GO_VERY_LONG_CHAIN_FATTY_ACID_CATABOLIC_PROCESS		5	0.69105446	1.3529022	0.124282986	0.35551202	1	10780	tags=60%, list=20%, signal=75%
GO_POSITIVE_REGULATION_OF_SPHINGOLIPID_BIOSYNTHETIC_PROCESS	GO_POSITIVE_REGULATION_OF_SPHINGOLIPID_BIOSYNTHETIC_PROCESS		9	0.5516534	1.3526946	0.12316176	0.3556594	1	11958	tags=56%, list=22%, signal=71%
GO_INNATE_IMMUNE_RESPONSE_ACTIVATING_CELL_SURFACE_RECEPTOR_SIGNALING_PATHWAY	GO_INNATE_IMMUNE_RESPONSE_ACTIVATING_CELL_SURFACE_RECEPTOR_SIGNALING_PATHWAY		115	0.3822298	1.3524686	0.10338983	0.35582772	1	7283	tags=35%, list=13%, signal=40%
GO_POSITIVE_REGULATION_OF_OXIDATIVE_STRESS_INDUCED_CELL_DEATH	GO_POSITIVE_REGULATION_OF_OXIDATIVE_STRESS_INDUCED_CELL_DEATH		14	0.49262267	1.3523558	0.12316176	0.35578707	1	8501	tags=50%, list=15%, signal=59%
GO_POSITIVE_REGULATION_OF_REGULATED_SECRETORY_PATHWAY	GO_POSITIVE_REGULATION_OF_REGULATED_SECRETORY_PATHWAY		52	0.39705613	1.3523262	0.09810671	0.355609	1	4644	tags=25%, list=8%, signal=27%
GO_MARGINAL_ZONE_B_CELL_DIFFERENTIATION	GO_MARGINAL_ZONE_B_CELL_DIFFERENTIATION		9	0.6178932	1.352113	0.13157895	0.3557646	1	10312	tags=56%, list=19%, signal=68%
GO_ORGANOPHOSPHATE_CATABOLIC_PROCESS	GO_ORGANOPHOSPHATE_CATABOLIC_PROCESS		128	0.35746542	1.3520577	0.08202443	0.35563207	1	5918	tags=23%, list=11%, signal=25%
GO_ANTIGEN_PROCESSING_AND_PRESENTATION	GO_ANTIGEN_PROCESSING_AND_PRESENTATION		220	0.37472987	1.3516381	0.12862319	0.35622042	1	7892	tags=29%, list=14%, signal=33%
GO_REGULATION_OF_PHOSPHORUS_METABOLIC_PROCESS	GO_REGULATION_OF_PHOSPHORUS_METABOLIC_PROCESS		1669	0.3310099	1.3513117	0.094736844	0.35655546	1	7435	tags=24%, list=13%, signal=26%
GO_COAGULATION	GO_COAGULATION		340	0.35087267	1.3506311	0.11544991	0.3576258	1	6270	tags=22%, list=11%, signal=25%
GO_TACHYKININ_RECEPTOR_SIGNALING_PATHWAY	GO_TACHYKININ_RECEPTOR_SIGNALING_PATHWAY		8	0.61019665	1.3502884	0.122522525	0.35800672	1	15961	tags=63%, list=29%, signal=88%
GO_MAINTENANCE_OF_SISTER_CHROMATID_COHESION	GO_MAINTENANCE_OF_SISTER_CHROMATID_COHESION		12	0.58970267	1.3501782	0.15264188	0.35796833	1	10008	tags=67%, list=18%, signal=81%
GO_REGULATION_OF_PROTEIN_KINASE_C_ACTIVITY	GO_REGULATION_OF_PROTEIN_KINASE_C_ACTIVITY		5	0.7097191	1.3501595	0.13595706	0.3577601	1	9866	tags=40%, list=18%, signal=49%
GO_SOMITE_SPECIFICATION	GO_SOMITE_SPECIFICATION		5	0.6764736	1.3499966	0.10909091	0.35782441	1	16521	tags=60%, list=30%, signal=86%
GO_DENTATE_GYRUS_DEVELOPMENT	GO_DENTATE_GYRUS_DEVELOPMENT		16	0.5470968	1.3497586	0.1508772	0.35803416	1	14563	tags=63%, list=26%, signal=85%
GO_REGULATION_OF_PLASMA_MEMBRANE_ORGANIZATION	GO_REGULATION_OF_PLASMA_MEMBRANE_ORGANIZATION		12	0.5623111	1.3494369	0.1268116	0.35839343	1	11958	tags=42%, list=22%, signal=53%
GO_REGULATION_OF_VIRAL_INDUCED_CYTOPLASMIC_PATTERN_RECOGNITION_RECEPTOR_SIGNALING_PATHWAY	GO_REGULATION_OF_VIRAL_INDUCED_CYTOPLASMIC_PATTERN_RECOGNITION_RECEPTOR_SIGNALING_PATHWAY		21	0.45769757	1.3493878	0.10611511	0.35823548	1	6562	tags=33%, list=12%, signal=38%
GO_BLOOD_VESSEL_MATURATION	GO_BLOOD_VESSEL_MATURATION		8	0.6913056	1.3491232	0.17933723	0.35849473	1	7640	tags=63%, list=14%, signal=73%
GO_POSITIVE_REGULATION_OF_TRANSPORT	GO_POSITIVE_REGULATION_OF_TRANSPORT		948	0.3289053	1.3490309	0.080267556	0.35843366	1	8856	tags=26%, list=16%, signal=30%
GO_POSITIVE_REGULATION_OF_SYSTEMIC_ARTERIAL_BLOOD_PRESSURE	GO_POSITIVE_REGULATION_OF_SYSTEMIC_ARTERIAL_BLOOD_PRESSURE		13	0.5412487	1.3483838	0.12862319	0.35940427	1	2203	tags=23%, list=4%, signal=24%
GO_LIPID_PHOSPHORYLATION	GO_LIPID_PHOSPHORYLATION		64	0.42264464	1.348257	0.1299435	0.35941747	1	6043	tags=27%, list=11%, signal=30%
GO_DNA_DEAMINATION	GO_DNA_DEAMINATION		13	0.5906416	1.348172	0.15225564	0.35932395	1	4326	tags=46%, list=8%, signal=50%
GO_NEURON_DEATH_IN_RESPONSE_TO_OXIDATIVE_STRESS	GO_NEURON_DEATH_IN_RESPONSE_TO_OXIDATIVE_STRESS		26	0.45487994	1.3473351	0.11710037	0.36064422	1	6122	tags=31%, list=11%, signal=35%
GO_POSITIVE_REGULATION_OF_EPIDERMAL_GROWTH_FACTOR_ACTIVATED_RECEPTOR_ACTIVITY	GO_POSITIVE_REGULATION_OF_EPIDERMAL_GROWTH_FACTOR_ACTIVATED_RECEPTOR_ACTIVITY		10	0.55520046	1.3470991	0.12952381	0.36081505	1	6144	tags=40%, list=11%, signal=45%
GO_REGULATION_OF_KINASE_ACTIVITY	GO_REGULATION_OF_KINASE_ACTIVITY		851	0.34054333	1.3470876	0.09608541	0.3605892	1	7435	tags=24%, list=13%, signal=27%
GO_GLOMERULAR_MESANGIUM_DEVELOPMENT	GO_GLOMERULAR_MESANGIUM_DEVELOPMENT		15	0.5596014	1.3470827	0.15296367	0.36035186	1	7432	tags=47%, list=13%, signal=54%
GO_NEGATIVE_REGULATION_OF_VASCULAR_SMOOTH_MUSCLE_CELL_DIFFERENTIATION	GO_NEGATIVE_REGULATION_OF_VASCULAR_SMOOTH_MUSCLE_CELL_DIFFERENTIATION		13	0.55633724	1.3461926	0.14828898	0.3617784	1	5824	tags=38%, list=11%, signal=43%
GO_CELL_MATRIX_ADHESION	GO_CELL_MATRIX_ADHESION		219	0.40237248	1.3458867	0.14528301	0.36210787	1	6866	tags=27%, list=12%, signal=31%
GO_PHOSPHATIDYLINOSITOL_BIOSYNTHETIC_PROCESS	GO_PHOSPHATIDYLINOSITOL_BIOSYNTHETIC_PROCESS		116	0.40396416	1.3455527	0.15047619	0.36246625	1	6043	tags=30%, list=11%, signal=34%
GO_POSITIVE_REGULATION_OF_MUSCLE_CELL_APOPTOTIC_PROCESS	GO_POSITIVE_REGULATION_OF_MUSCLE_CELL_APOPTOTIC_PROCESS		32	0.4039807	1.3453516	0.09774436	0.36255902	1	12994	tags=44%, list=24%, signal=57%
GO_POSITIVE_REGULATION_OF_VIRAL_LIFE_CYCLE	GO_POSITIVE_REGULATION_OF_VIRAL_LIFE_CYCLE		59	0.4016224	1.3451222	0.140625	0.36276203	1	3212	tags=25%, list=6%, signal=27%
GO_POSITIVE_REGULATION_OF_NATURAL_KILLER_CELL_CHEMOTAXIS	GO_POSITIVE_REGULATION_OF_NATURAL_KILLER_CELL_CHEMOTAXIS		6	0.68703455	1.3449507	0.16141732	0.36281458	1	2136	tags=33%, list=4%, signal=35%
GO_POSITIVE_REGULATION_OF_CELL_SUBSTRATE_ADHESION	GO_POSITIVE_REGULATION_OF_CELL_SUBSTRATE_ADHESION		118	0.40585235	1.3449078	0.14579439	0.362652	1	6866	tags=29%, list=12%, signal=33%
GO_ACUTE_INFLAMMATORY_RESPONSE	GO_ACUTE_INFLAMMATORY_RESPONSE		107	0.3934069	1.3437908	0.096618354	0.36458012	1	8987	tags=33%, list=16%, signal=39%
GO_POSITIVE_REGULATION_OF_NLRP3_INFLAMMASOME_COMPLEX_ASSEMBLY	GO_POSITIVE_REGULATION_OF_NLRP3_INFLAMMASOME_COMPLEX_ASSEMBLY		7	0.60114455	1.3437843	0.125	0.36434558	1	4255	tags=43%, list=8%, signal=46%
GO_CARDIOVASCULAR_SYSTEM_DEVELOPMENT	GO_CARDIOVASCULAR_SYSTEM_DEVELOPMENT		768	0.35459915	1.3431989	0.1375	0.36514068	1	9194	tags=28%, list=17%, signal=33%
GO_CELLULAR_RESPONSE_TO_GLUCAGON_STIMULUS	GO_CELLULAR_RESPONSE_TO_GLUCAGON_STIMULUS		26	0.47430095	1.3421485	0.12013537	0.36689168	1	13691	tags=50%, list=25%, signal=66%
GO_REGULATION_OF_ANTIGEN_PROCESSING_AND_PRESENTATION_OF_PEPTIDE_ANTIGEN	GO_REGULATION_OF_ANTIGEN_PROCESSING_AND_PRESENTATION_OF_PEPTIDE_ANTIGEN		6	0.6489815	1.342128	0.1618497	0.36668834	1	3452	tags=50%, list=6%, signal=53%
GO_REGULATION_OF_TRANSLATION_AT_SYNAPSE_MODULATING_SYNAPTIC_TRANSMISSION	GO_REGULATION_OF_TRANSLATION_AT_SYNAPSE_MODULATING_SYNAPTIC_TRANSMISSION		5	0.6946135	1.3421267	0.15655577	0.36644495	1	12095	tags=60%, list=22%, signal=77%
GO_TUMOR_NECROSIS_FACTOR_MEDIATED_SIGNALING_PATHWAY	GO_TUMOR_NECROSIS_FACTOR_MEDIATED_SIGNALING_PATHWAY		164	0.3760646	1.3419044	0.11655405	0.3666679	1	6562	tags=28%, list=12%, signal=32%
GO_INTERLEUKIN_18_PRODUCTION	GO_INTERLEUKIN_18_PRODUCTION		10	0.5867173	1.3418896	0.15647481	0.36644816	1	13870	tags=70%, list=25%, signal=93%
GO_RESPONSE_TO_MACROPHAGE_COLONY_STIMULATING_FACTOR	GO_RESPONSE_TO_MACROPHAGE_COLONY_STIMULATING_FACTOR		12	0.5844237	1.3417687	0.16366906	0.36644304	1	7009	tags=50%, list=13%, signal=57%
GO_REGULATION_OF_BLOOD_VESSEL_REMODELING	GO_REGULATION_OF_BLOOD_VESSEL_REMODELING		7	0.61341035	1.3417586	0.14203455	0.3662227	1	3656	tags=43%, list=7%, signal=46%
GO_REGULATION_OF_SYSTEMIC_ARTERIAL_BLOOD_PRESSURE_MEDIATED_BY_A_CHEMICAL_SIGNAL	GO_REGULATION_OF_SYSTEMIC_ARTERIAL_BLOOD_PRESSURE_MEDIATED_BY_A_CHEMICAL_SIGNAL		48	0.4460286	1.341095	0.12169312	0.36726758	1	7082	tags=25%, list=13%, signal=29%
GO_REGULATION_OF_ENDOTHELIAL_CELL_DEVELOPMENT	GO_REGULATION_OF_ENDOTHELIAL_CELL_DEVELOPMENT		12	0.5684518	1.3409126	0.17407407	0.36736736	1	15234	tags=75%, list=28%, signal=104%
GO_PANTOTHENATE_METABOLIC_PROCESS	GO_PANTOTHENATE_METABOLIC_PROCESS		7	0.6359283	1.3404984	0.1482821	0.36793503	1	7858	tags=57%, list=14%, signal=67%
GO_HYDROGEN_PEROXIDE_METABOLIC_PROCESS	GO_HYDROGEN_PEROXIDE_METABOLIC_PROCESS		13	0.49829596	1.3401505	0.12037037	0.36835793	1	7803	tags=31%, list=14%, signal=36%
GO_CELLULAR_RESPONSE_TO_INSULIN_STIMULUS	GO_CELLULAR_RESPONSE_TO_INSULIN_STIMULUS		213	0.35264117	1.3395222	0.11891892	0.36930686	1	8856	tags=28%, list=16%, signal=33%
GO_POSITIVE_REGULATION_OF_PROTEIN_METABOLIC_PROCESS	GO_POSITIVE_REGULATION_OF_PROTEIN_METABOLIC_PROCESS		1612	0.32343477	1.3388727	0.089788735	0.37026912	1	7435	tags=24%, list=13%, signal=27%
GO_POSITIVE_REGULATION_OF_NATURAL_KILLER_CELL_DIFFERENTIATION	GO_POSITIVE_REGULATION_OF_NATURAL_KILLER_CELL_DIFFERENTIATION		8	0.6282873	1.3387176	0.15689981	0.37032843	1	3384	tags=38%, list=6%, signal=40%
GO_NEGATIVE_REGULATION_OF_TISSUE_REMODELING	GO_NEGATIVE_REGULATION_OF_TISSUE_REMODELING		19	0.4904308	1.3386923	0.12371134	0.37012148	1	4735	tags=26%, list=9%, signal=29%
GO_NEGATIVE_REGULATION_OF_NITRIC_OXIDE_BIOSYNTHETIC_PROCESS	GO_NEGATIVE_REGULATION_OF_NITRIC_OXIDE_BIOSYNTHETIC_PROCESS		18	0.4612193	1.3384634	0.13872832	0.3703458	1	15234	tags=56%, list=28%, signal=77%
GO_NEGATIVE_REGULATION_OF_TRIGLYCERIDE_BIOSYNTHETIC_PROCESS	GO_NEGATIVE_REGULATION_OF_TRIGLYCERIDE_BIOSYNTHETIC_PROCESS		5	0.6764467	1.3382883	0.14209591	0.37042472	1	13591	tags=60%, list=25%, signal=80%
GO_ACTIVATION_OF_PROTEIN_KINASE_ACTIVITY	GO_ACTIVATION_OF_PROTEIN_KINASE_ACTIVITY		330	0.35178304	1.3381867	0.106571935	0.37036344	1	8932	tags=28%, list=16%, signal=33%
GO_AMMONIUM_TRANSPORT	GO_AMMONIUM_TRANSPORT		107	0.38151202	1.3378856	0.096979335	0.37067032	1	8616	tags=29%, list=16%, signal=34%
GO_POSITIVE_REGULATION_OF_DEVELOPMENTAL_PIGMENTATION	GO_POSITIVE_REGULATION_OF_DEVELOPMENTAL_PIGMENTATION		9	0.57316554	1.3377336	0.13508442	0.37073177	1	2997	tags=33%, list=5%, signal=35%
GO_POSITIVE_REGULATION_OF_POTASSIUM_ION_TRANSPORT	GO_POSITIVE_REGULATION_OF_POTASSIUM_ION_TRANSPORT		47	0.4278434	1.3375471	0.10350877	0.3708334	1	10663	tags=38%, list=19%, signal=47%
GO_MOLTING_CYCLE	GO_MOLTING_CYCLE		112	0.3717888	1.3372549	0.10899654	0.37115407	1	10488	tags=31%, list=19%, signal=39%
GO_ASTROCYTE_DIFFERENTIATION	GO_ASTROCYTE_DIFFERENTIATION		78	0.39767116	1.3366592	0.111853085	0.37202036	1	10649	tags=33%, list=19%, signal=41%
GO_ENTRY_INTO_OTHER_ORGANISM_INVOLVED_IN_SYMBIOTIC_INTERACTION	GO_ENTRY_INTO_OTHER_ORGANISM_INVOLVED_IN_SYMBIOTIC_INTERACTION		134	0.3645583	1.3363472	0.12014134	0.37236878	1	7420	tags=28%, list=13%, signal=33%
GO_FATTY_ACID_BETA_OXIDATION_USING_ACYL_COA_OXIDASE	GO_FATTY_ACID_BETA_OXIDATION_USING_ACYL_COA_OXIDASE		15	0.4872703	1.3362228	0.144	0.37236786	1	6810	tags=40%, list=12%, signal=46%
GO_CELLULAR_RESPONSE_TO_BRAIN_DERIVED_NEUROTROPHIC_FACTOR_STIMULUS	GO_CELLULAR_RESPONSE_TO_BRAIN_DERIVED_NEUROTROPHIC_FACTOR_STIMULUS		9	0.60528505	1.3358185	0.14181818	0.37291607	1	10028	tags=44%, list=18%, signal=54%
GO_POSITIVE_REGULATION_OF_CAMP_DEPENDENT_PROTEIN_KINASE_ACTIVITY	GO_POSITIVE_REGULATION_OF_CAMP_DEPENDENT_PROTEIN_KINASE_ACTIVITY		5	0.7047742	1.3357275	0.12333966	0.37284184	1	6835	tags=60%, list=12%, signal=68%
GO_REGULATION_OF_NUCLEAR_TRANSCRIBED_MRNA_CATABOLIC_PROCESS_DEADENYLATION_DEPENDENT_DECAY	GO_REGULATION_OF_NUCLEAR_TRANSCRIBED_MRNA_CATABOLIC_PROCESS_DEADENYLATION_DEPENDENT_DECAY		20	0.51165015	1.3356357	0.15145631	0.3727786	1	6374	tags=40%, list=12%, signal=45%
GO_DISRUPTION_OF_CELLS_OF_OTHER_ORGANISM_INVOLVED_IN_SYMBIOTIC_INTERACTION	GO_DISRUPTION_OF_CELLS_OF_OTHER_ORGANISM_INVOLVED_IN_SYMBIOTIC_INTERACTION		17	0.49736333	1.3355224	0.12295082	0.37275502	1	6358	tags=29%, list=12%, signal=33%
GO_NEGATIVE_REGULATION_OF_CYTOKINE_SECRETION_INVOLVED_IN_IMMUNE_RESPONSE	GO_NEGATIVE_REGULATION_OF_CYTOKINE_SECRETION_INVOLVED_IN_IMMUNE_RESPONSE		6	0.7140139	1.335417	0.13020833	0.37270758	1	15786	tags=100%, list=29%, signal=140%
GO_REGULATION_OF_AUTOPHAGOSOME_MATURATION	GO_REGULATION_OF_AUTOPHAGOSOME_MATURATION		11	0.54493606	1.3350315	0.15180266	0.37318242	1	8740	tags=45%, list=16%, signal=54%
GO_MONOVALENT_INORGANIC_CATION_HOMEOSTASIS	GO_MONOVALENT_INORGANIC_CATION_HOMEOSTASIS		154	0.35751465	1.3349448	0.096610166	0.37309548	1	7453	tags=24%, list=14%, signal=28%
GO_VASCULAR_ASSOCIATED_SMOOTH_MUSCLE_CELL_APOPTOTIC_PROCESS	GO_VASCULAR_ASSOCIATED_SMOOTH_MUSCLE_CELL_APOPTOTIC_PROCESS		14	0.48551765	1.3347707	0.12331407	0.37316704	1	10863	tags=43%, list=20%, signal=53%
GO_APOPTOTIC_CELL_CLEARANCE	GO_APOPTOTIC_CELL_CLEARANCE		44	0.45121676	1.3345708	0.15818182	0.37329754	1	8078	tags=39%, list=15%, signal=45%
GO_REGULATION_OF_METALLOENDOPEPTIDASE_ACTIVITY	GO_REGULATION_OF_METALLOENDOPEPTIDASE_ACTIVITY		8	0.63043517	1.3344253	0.18467583	0.373312	1	3924	tags=25%, list=7%, signal=27%
GO_POSITIVE_REGULATION_OF_NEUROTROPHIN_TRK_RECEPTOR_SIGNALING_PATHWAY	GO_POSITIVE_REGULATION_OF_NEUROTROPHIN_TRK_RECEPTOR_SIGNALING_PATHWAY		7	0.6279603	1.3339692	0.13989638	0.3739584	1	8486	tags=57%, list=15%, signal=68%
GO_REGULATION_OF_CYTOLYSIS	GO_REGULATION_OF_CYTOLYSIS		16	0.53689015	1.3334655	0.123128116	0.37468338	1	4922	tags=31%, list=9%, signal=34%
GO_SENSORY_PERCEPTION_OF_BITTER_TASTE	GO_SENSORY_PERCEPTION_OF_BITTER_TASTE		44	0.4284654	1.3330994	0.104631215	0.37512097	1	15799	tags=50%, list=29%, signal=70%
GO_POSITIVE_REGULATION_OF_CELL_DIFFERENTIATION	GO_POSITIVE_REGULATION_OF_CELL_DIFFERENTIATION		967	0.34186172	1.3330576	0.12216405	0.37493756	1	8345	tags=25%, list=15%, signal=28%
GO_PROTEIN_LOCALIZATION_TO_PHAGOPHORE_ASSEMBLY_SITE	GO_PROTEIN_LOCALIZATION_TO_PHAGOPHORE_ASSEMBLY_SITE		13	0.52657753	1.3330487	0.13752456	0.37470752	1	3476	tags=31%, list=6%, signal=33%
GO_GRANULOCYTE_DIFFERENTIATION	GO_GRANULOCYTE_DIFFERENTIATION		33	0.44535306	1.3327751	0.124087594	0.37498882	1	2308	tags=21%, list=4%, signal=22%
GO_DENDRITIC_SPINE_MAINTENANCE	GO_DENDRITIC_SPINE_MAINTENANCE		20	0.44778067	1.3324327	0.14424951	0.37538704	1	1131	tags=20%, list=2%, signal=20%
GO_INOSITOL_PHOSPHATE_CATABOLIC_PROCESS	GO_INOSITOL_PHOSPHATE_CATABOLIC_PROCESS		16	0.5124787	1.3322654	0.14038461	0.3754702	1	4682	tags=38%, list=8%, signal=41%
GO_KERATINOCYTE_APOPTOTIC_PROCESS	GO_KERATINOCYTE_APOPTOTIC_PROCESS		6	0.65193576	1.3321866	0.16793893	0.37536946	1	16131	tags=67%, list=29%, signal=94%
GO_TRIGEMINAL_NERVE_DEVELOPMENT	GO_TRIGEMINAL_NERVE_DEVELOPMENT		12	0.54393137	1.3317921	0.16550523	0.37588713	1	9050	tags=50%, list=16%, signal=60%
GO_RESPONSE_TO_ANTIBIOTIC	GO_RESPONSE_TO_ANTIBIOTIC		318	0.33574587	1.331541	0.07939189	0.3760986	1	6768	tags=23%, list=12%, signal=26%
GO_POSITIVE_REGULATION_OF_TRANSCRIPTION_OF_NOTCH_RECEPTOR_TARGET	GO_POSITIVE_REGULATION_OF_TRANSCRIPTION_OF_NOTCH_RECEPTOR_TARGET		18	0.53295493	1.3308555	0.15749526	0.37716806	1	11709	tags=50%, list=21%, signal=63%
GO_SECRETORY_GRANULE_LOCALIZATION	GO_SECRETORY_GRANULE_LOCALIZATION		11	0.56969225	1.3302629	0.17115384	0.37802905	1	285	tags=18%, list=1%, signal=18%
GO_HISTONE_H3_K9_METHYLATION	GO_HISTONE_H3_K9_METHYLATION		38	0.48079488	1.329993	0.1786372	0.37828916	1	15347	tags=61%, list=28%, signal=84%
GO_NEGATIVE_REGULATION_OF_HISTONE_DEACETYLATION	GO_NEGATIVE_REGULATION_OF_HISTONE_DEACETYLATION		6	0.6332443	1.3298839	0.12429378	0.37824848	1	6189	tags=33%, list=11%, signal=38%
GO_MEMBRANE_RAFT_ORGANIZATION	GO_MEMBRANE_RAFT_ORGANIZATION		24	0.4392652	1.3298444	0.12110092	0.37808684	1	3611	tags=25%, list=7%, signal=27%
GO_POSITIVE_REGULATION_OF_ESTABLISHMENT_OF_PROTEIN_LOCALIZATION	GO_POSITIVE_REGULATION_OF_ESTABLISHMENT_OF_PROTEIN_LOCALIZATION		436	0.32748774	1.3298368	0.085324235	0.3778544	1	9033	tags=26%, list=16%, signal=31%
GO_REGULATION_OF_VESICLE_MEDIATED_TRANSPORT	GO_REGULATION_OF_VESICLE_MEDIATED_TRANSPORT		516	0.3411384	1.3296356	0.11247803	0.37795863	1	8915	tags=28%, list=16%, signal=33%
GO_EPITHELIAL_CELL_DEVELOPMENT	GO_EPITHELIAL_CELL_DEVELOPMENT		201	0.35862195	1.3295852	0.118353345	0.3778005	1	10613	tags=32%, list=19%, signal=40%
GO_DNA_ENDOREDUPLICATION	GO_DNA_ENDOREDUPLICATION		10	0.64461845	1.3294677	0.18627451	0.37777042	1	9007	tags=60%, list=16%, signal=72%
GO_CYCLIC_NUCLEOTIDE_CATABOLIC_PROCESS	GO_CYCLIC_NUCLEOTIDE_CATABOLIC_PROCESS		13	0.5490198	1.3292948	0.14625229	0.377841	1	5891	tags=31%, list=11%, signal=34%
GO_REGULATION_OF_PROTEIN_SERINE_THREONINE_KINASE_ACTIVITY	GO_REGULATION_OF_PROTEIN_SERINE_THREONINE_KINASE_ACTIVITY		501	0.33589405	1.3291706	0.11150443	0.37783697	1	7307	tags=23%, list=13%, signal=26%
GO_POSITIVE_REGULATION_OF_INTEGRIN_ACTIVATION	GO_POSITIVE_REGULATION_OF_INTEGRIN_ACTIVATION		8	0.6229885	1.329125	0.15073529	0.37767485	1	12518	tags=63%, list=23%, signal=81%
GO_COHESIN_LOADING	GO_COHESIN_LOADING		6	0.6453135	1.3289773	0.18650794	0.3777145	1	10008	tags=67%, list=18%, signal=81%
GO_SPHINGOID_BIOSYNTHETIC_PROCESS	GO_SPHINGOID_BIOSYNTHETIC_PROCESS		12	0.5284987	1.3285692	0.14285715	0.37821302	1	5214	tags=42%, list=9%, signal=46%
GO_NEGATIVE_REGULATION_OF_MAPK_CASCADE	GO_NEGATIVE_REGULATION_OF_MAPK_CASCADE		174	0.34438038	1.3283662	0.104779415	0.37832725	1	10296	tags=32%, list=19%, signal=39%
GO_SEROTONIN_UPTAKE	GO_SEROTONIN_UPTAKE		6	0.6630059	1.3279418	0.16787003	0.37887987	1	8457	tags=50%, list=15%, signal=59%
GO_DNA_METHYLATION_OR_DEMETHYLATION	GO_DNA_METHYLATION_OR_DEMETHYLATION		89	0.41735372	1.3278973	0.14991182	0.37872243	1	12910	tags=43%, list=23%, signal=56%
GO_CELL_CELL_ADHESION_INVOLVED_IN_GASTRULATION	GO_CELL_CELL_ADHESION_INVOLVED_IN_GASTRULATION		12	0.5442811	1.3278046	0.15076336	0.37863284	1	6122	tags=42%, list=11%, signal=47%
GO_DNA_DOUBLE_STRAND_BREAK_PROCESSING	GO_DNA_DOUBLE_STRAND_BREAK_PROCESSING		25	0.53483695	1.3276107	0.17843866	0.37873274	1	7467	tags=40%, list=14%, signal=46%
GO_POSITIVE_REGULATION_OF_CELL_PROLIFERATION_INVOLVED_IN_KIDNEY_DEVELOPMENT	GO_POSITIVE_REGULATION_OF_CELL_PROLIFERATION_INVOLVED_IN_KIDNEY_DEVELOPMENT		8	0.58882153	1.3275545	0.13309352	0.3786097	1	7432	tags=50%, list=13%, signal=58%
GO_ACTIVATION_OF_JNKK_ACTIVITY	GO_ACTIVATION_OF_JNKK_ACTIVITY		11	0.53053135	1.3272879	0.1352381	0.3788425	1	5324	tags=27%, list=10%, signal=30%
GO_ESTABLISHMENT_OF_ENDOTHELIAL_BARRIER	GO_ESTABLISHMENT_OF_ENDOTHELIAL_BARRIER		40	0.45429298	1.3267689	0.17142858	0.37956437	1	4283	tags=25%, list=8%, signal=27%
GO_POSITIVE_REGULATION_OF_ADIPOSE_TISSUE_DEVELOPMENT	GO_POSITIVE_REGULATION_OF_ADIPOSE_TISSUE_DEVELOPMENT		5	0.6670869	1.326365	0.12523365	0.38010263	1	3794	tags=40%, list=7%, signal=43%
GO_SEQUESTERING_OF_ZINC_ION	GO_SEQUESTERING_OF_ZINC_ION		8	0.5837415	1.3263587	0.13483146	0.37986445	1	3320	tags=38%, list=6%, signal=40%
GO_POSITIVE_REGULATION_OF_ERBB_SIGNALING_PATHWAY	GO_POSITIVE_REGULATION_OF_ERBB_SIGNALING_PATHWAY		33	0.42455554	1.3262247	0.122180454	0.37987468	1	7148	tags=30%, list=13%, signal=35%
GO_RETINA_HOMEOSTASIS	GO_RETINA_HOMEOSTASIS		71	0.3848156	1.3259081	0.1203252	0.38022837	1	11502	tags=35%, list=21%, signal=44%
GO_REGULATION_OF_I_KAPPAB_PHOSPHORYLATION	GO_REGULATION_OF_I_KAPPAB_PHOSPHORYLATION		6	0.6194517	1.3255261	0.12075472	0.3806911	1	7624	tags=67%, list=14%, signal=77%
GO_PODOSOME_ASSEMBLY	GO_PODOSOME_ASSEMBLY		19	0.4802695	1.3252609	0.15523465	0.38094556	1	4872	tags=26%, list=9%, signal=29%
GO_REGULATION_OF_ACTIN_CYTOSKELETON_REORGANIZATION	GO_REGULATION_OF_ACTIN_CYTOSKELETON_REORGANIZATION		33	0.4188894	1.324668	0.14338236	0.38179693	1	1674	tags=18%, list=3%, signal=19%
GO_TRANSMEMBRANE_RECEPTOR_PROTEIN_TYROSINE_KINASE_SIGNALING_PATHWAY	GO_TRANSMEMBRANE_RECEPTOR_PROTEIN_TYROSINE_KINASE_SIGNALING_PATHWAY		706	0.33645654	1.3246175	0.13513513	0.3816556	1	7399	tags=23%, list=13%, signal=26%
GO_TRYPTOPHAN_CATABOLIC_PROCESS_TO_KYNURENINE	GO_TRYPTOPHAN_CATABOLIC_PROCESS_TO_KYNURENINE		5	0.6613386	1.32447	0.13953489	0.38167906	1	1483	tags=40%, list=3%, signal=41%
GO_MULTICELLULAR_ORGANISMAL_IRON_ION_HOMEOSTASIS	GO_MULTICELLULAR_ORGANISMAL_IRON_ION_HOMEOSTASIS		9	0.5622108	1.3238558	0.15047619	0.38261056	1	9327	tags=44%, list=17%, signal=53%
GO_NOREPINEPHRINE_SECRETION	GO_NOREPINEPHRINE_SECRETION		17	0.51304615	1.3235937	0.13973063	0.38291606	1	4672	tags=29%, list=8%, signal=32%
GO_REGULATION_OF_HEPATOCYTE_PROLIFERATION	GO_REGULATION_OF_HEPATOCYTE_PROLIFERATION		13	0.5145535	1.3235859	0.14285715	0.38269094	1	3925	tags=31%, list=7%, signal=33%
GO_NEGATIVE_REGULATION_OF_TOLL_LIKE_RECEPTOR_2_SIGNALING_PATHWAY	GO_NEGATIVE_REGULATION_OF_TOLL_LIKE_RECEPTOR_2_SIGNALING_PATHWAY		5	0.68773717	1.3234674	0.14104882	0.3826858	1	15091	tags=80%, list=27%, signal=110%
GO_G_PROTEIN_COUPLED_RECEPTOR_SIGNALING_PATHWAY_COUPLED_TO_CYCLIC_NUCLEOTIDE_SECOND_MESSENGER	GO_G_PROTEIN_COUPLED_RECEPTOR_SIGNALING_PATHWAY_COUPLED_TO_CYCLIC_NUCLEOTIDE_SECOND_MESSENGER		253	0.36298144	1.3234026	0.12082671	0.38255826	1	13794	tags=37%, list=25%, signal=49%
GO_ARTERIAL_ENDOTHELIAL_CELL_DIFFERENTIATION	GO_ARTERIAL_ENDOTHELIAL_CELL_DIFFERENTIATION		6	0.65025735	1.3227984	0.1521739	0.3834596	1	10255	tags=50%, list=19%, signal=61%
GO_POSITIVE_REGULATION_OF_TYPE_I_INTERFERON_MEDIATED_SIGNALING_PATHWAY	GO_POSITIVE_REGULATION_OF_TYPE_I_INTERFERON_MEDIATED_SIGNALING_PATHWAY		13	0.51483524	1.322751	0.15267175	0.3833019	1	9739	tags=46%, list=18%, signal=56%
GO_REGULATION_OF_REMOVAL_OF_SUPEROXIDE_RADICALS	GO_REGULATION_OF_REMOVAL_OF_SUPEROXIDE_RADICALS		11	0.5432626	1.322708	0.15019011	0.38312438	1	8566	tags=55%, list=16%, signal=65%
GO_IMMUNE_RESPONSE_INHIBITING_SIGNAL_TRANSDUCTION	GO_IMMUNE_RESPONSE_INHIBITING_SIGNAL_TRANSDUCTION		8	0.6182319	1.3225586	0.17210145	0.3831604	1	5752	tags=38%, list=10%, signal=42%
GO_MAMMARY_GLAND_EPITHELIAL_CELL_PROLIFERATION	GO_MAMMARY_GLAND_EPITHELIAL_CELL_PROLIFERATION		28	0.4338352	1.3220286	0.14134276	0.38397002	1	10613	tags=32%, list=19%, signal=40%
GO_NEGATIVE_REGULATION_OF_FIBROBLAST_PROLIFERATION	GO_NEGATIVE_REGULATION_OF_FIBROBLAST_PROLIFERATION		32	0.43789086	1.3219311	0.13914657	0.38391498	1	3788	tags=22%, list=7%, signal=23%
GO_ENDOSOME_TO_PLASMA_MEMBRANE_PROTEIN_TRANSPORT	GO_ENDOSOME_TO_PLASMA_MEMBRANE_PROTEIN_TRANSPORT		11	0.53085357	1.3218533	0.14258555	0.38379574	1	18448	tags=73%, list=33%, signal=109%
GO_POSITIVE_REGULATION_OF_GASTRO_INTESTINAL_SYSTEM_SMOOTH_MUSCLE_CONTRACTION	GO_POSITIVE_REGULATION_OF_GASTRO_INTESTINAL_SYSTEM_SMOOTH_MUSCLE_CONTRACTION		6	0.6400131	1.3216444	0.11795775	0.38395363	1	4571	tags=50%, list=8%, signal=55%
GO_NEGATIVE_REGULATION_OF_B_CELL_APOPTOTIC_PROCESS	GO_NEGATIVE_REGULATION_OF_B_CELL_APOPTOTIC_PROCESS		12	0.5043123	1.3212787	0.14391144	0.3844132	1	966	tags=25%, list=2%, signal=25%
GO_REGULATION_OF_BONE_MINERALIZATION	GO_REGULATION_OF_BONE_MINERALIZATION		70	0.4107781	1.3207068	0.14471243	0.38523465	1	14324	tags=36%, list=26%, signal=48%
GO_REGULATION_OF_MEMBRANE_PROTEIN_ECTODOMAIN_PROTEOLYSIS	GO_REGULATION_OF_MEMBRANE_PROTEIN_ECTODOMAIN_PROTEOLYSIS		23	0.4806488	1.320608	0.15789473	0.38516355	1	8856	tags=39%, list=16%, signal=47%
GO_RESPONSE_TO_INDOLE_3_METHANOL	GO_RESPONSE_TO_INDOLE_3_METHANOL		5	0.69448715	1.3201224	0.15936255	0.38582766	1	11451	tags=60%, list=21%, signal=76%
GO_REGULATION_OF_KERATINOCYTE_DIFFERENTIATION	GO_REGULATION_OF_KERATINOCYTE_DIFFERENTIATION		39	0.4268051	1.3194245	0.12313433	0.38695154	1	6463	tags=26%, list=12%, signal=29%
GO_POSITIVE_REGULATION_OF_CELLULAR_RESPONSE_TO_DRUG	GO_POSITIVE_REGULATION_OF_CELLULAR_RESPONSE_TO_DRUG		6	0.61437905	1.3193028	0.14087301	0.38695386	1	7554	tags=67%, list=14%, signal=77%
GO_LIPOPHAGY	GO_LIPOPHAGY		6	0.6646672	1.3192363	0.15758754	0.38683254	1	6835	tags=50%, list=12%, signal=57%
GO_IMMATURE_T_CELL_PROLIFERATION	GO_IMMATURE_T_CELL_PROLIFERATION		9	0.5594208	1.3188794	0.13621262	0.3872513	1	8499	tags=33%, list=15%, signal=39%
GO_POSITIVE_REGULATION_OF_ENDOTHELIAL_CELL_APOPTOTIC_PROCESS	GO_POSITIVE_REGULATION_OF_ENDOTHELIAL_CELL_APOPTOTIC_PROCESS		22	0.4691627	1.3187602	0.14419475	0.38723448	1	4197	tags=23%, list=8%, signal=25%
GO_VASCULAR_SMOOTH_MUSCLE_CONTRACTION	GO_VASCULAR_SMOOTH_MUSCLE_CONTRACTION		22	0.49595323	1.3187295	0.16513762	0.38704562	1	5227	tags=41%, list=9%, signal=45%
GO_PROSTATE_GLANDULAR_ACINUS_MORPHOGENESIS	GO_PROSTATE_GLANDULAR_ACINUS_MORPHOGENESIS		6	0.6932089	1.3187051	0.13285458	0.3868478	1	12612	tags=67%, list=23%, signal=86%
GO_ANATOMICAL_STRUCTURE_MATURATION	GO_ANATOMICAL_STRUCTURE_MATURATION		162	0.36048615	1.318494	0.13095239	0.38698885	1	7640	tags=26%, list=14%, signal=30%
GO_REGULATION_OF_CYCLASE_ACTIVITY	GO_REGULATION_OF_CYCLASE_ACTIVITY		44	0.41050953	1.3182341	0.12671232	0.38725907	1	5207	tags=20%, list=9%, signal=23%
GO_MYELOID_LEUKOCYTE_CYTOKINE_PRODUCTION	GO_MYELOID_LEUKOCYTE_CYTOKINE_PRODUCTION		29	0.45957947	1.3177385	0.12593985	0.38800147	1	4571	tags=31%, list=8%, signal=34%
GO_ESTABLISHMENT_OF_ENDOTHELIAL_INTESTINAL_BARRIER	GO_ESTABLISHMENT_OF_ENDOTHELIAL_INTESTINAL_BARRIER		10	0.58878416	1.3174095	0.17693837	0.38840273	1	2519	tags=40%, list=5%, signal=42%
GO_ACYL_CARNITINE_TRANSPORT	GO_ACYL_CARNITINE_TRANSPORT		5	0.72321373	1.3173374	0.14363636	0.38829383	1	4979	tags=40%, list=9%, signal=44%
GO_RENAL_SYSTEM_VASCULATURE_DEVELOPMENT	GO_RENAL_SYSTEM_VASCULATURE_DEVELOPMENT		26	0.5260993	1.3170625	0.2109375	0.3885858	1	13692	tags=54%, list=25%, signal=72%
GO_NEGATIVE_REGULATION_OF_STRIATED_MUSCLE_CONTRACTION	GO_NEGATIVE_REGULATION_OF_STRIATED_MUSCLE_CONTRACTION		10	0.55090797	1.3170071	0.14473684	0.38843894	1	3101	tags=30%, list=6%, signal=32%
GO_MONOCARBOXYLIC_ACID_TRANSPORT	GO_MONOCARBOXYLIC_ACID_TRANSPORT		160	0.33860084	1.3167605	0.08557845	0.38866666	1	11191	tags=34%, list=20%, signal=42%
GO_ESTABLISHMENT_OF_CELL_POLARITY	GO_ESTABLISHMENT_OF_CELL_POLARITY		130	0.3801677	1.3165454	0.14285715	0.38881975	1	8591	tags=30%, list=16%, signal=35%
GO_MEMBRANE_TO_MEMBRANE_DOCKING	GO_MEMBRANE_TO_MEMBRANE_DOCKING		5	0.6979161	1.3161523	0.17850287	0.38932815	1	4283	tags=40%, list=8%, signal=43%
GO_FRUCTOSE_CATABOLIC_PROCESS	GO_FRUCTOSE_CATABOLIC_PROCESS		5	0.6857939	1.3159449	0.15384616	0.38947493	1	5800	tags=40%, list=11%, signal=45%
GO_G1_TO_G0_TRANSITION	GO_G1_TO_G0_TRANSITION		10	0.5507022	1.3157682	0.15044248	0.3895973	1	16806	tags=40%, list=30%, signal=58%
GO_POSITIVE_REGULATION_OF_PROTEIN_DEUBIQUITINATION	GO_POSITIVE_REGULATION_OF_PROTEIN_DEUBIQUITINATION		7	0.6148637	1.3154466	0.14205608	0.38993347	1	20253	tags=86%, list=37%, signal=135%
GO_POST_EMBRYONIC_ANIMAL_MORPHOGENESIS	GO_POST_EMBRYONIC_ANIMAL_MORPHOGENESIS		12	0.5190733	1.314966	0.13996316	0.39055014	1	2961	tags=33%, list=5%, signal=35%
GO_CIRCADIAN_SLEEP_WAKE_CYCLE	GO_CIRCADIAN_SLEEP_WAKE_CYCLE		25	0.5139663	1.3147696	0.11018364	0.39066344	1	4467	tags=36%, list=8%, signal=39%
GO_REGULATION_OF_SYNAPTIC_TRANSMISSION_CHOLINERGIC	GO_REGULATION_OF_SYNAPTIC_TRANSMISSION_CHOLINERGIC		6	0.657538	1.3147337	0.15107913	0.3904903	1	14921	tags=50%, list=27%, signal=69%
GO_NEGATIVE_REGULATION_OF_STRIATED_MUSCLE_CELL_APOPTOTIC_PROCESS	GO_NEGATIVE_REGULATION_OF_STRIATED_MUSCLE_CELL_APOPTOTIC_PROCESS		29	0.42774272	1.3144566	0.116504855	0.39074585	1	5147	tags=24%, list=9%, signal=27%
GO_RESPONSE_TO_REACTIVE_OXYGEN_SPECIES	GO_RESPONSE_TO_REACTIVE_OXYGEN_SPECIES		222	0.33397004	1.3140347	0.105902776	0.39132923	1	6752	tags=25%, list=12%, signal=29%
GO_ADIPOSE_TISSUE_DEVELOPMENT	GO_ADIPOSE_TISSUE_DEVELOPMENT		41	0.43362373	1.3138779	0.15799257	0.39139113	1	8797	tags=34%, list=16%, signal=41%
GO_REGULATION_OF_PANCREATIC_JUICE_SECRETION	GO_REGULATION_OF_PANCREATIC_JUICE_SECRETION		7	0.58628076	1.3137974	0.15087041	0.3913053	1	9631	tags=57%, list=17%, signal=69%
GO_NEGATIVE_REGULATION_OF_ERYTHROCYTE_DIFFERENTIATION	GO_NEGATIVE_REGULATION_OF_ERYTHROCYTE_DIFFERENTIATION		10	0.5616549	1.3132238	0.17913386	0.39213955	1	6374	tags=30%, list=12%, signal=34%
GO_AZOLE_TRANSPORT	GO_AZOLE_TRANSPORT		22	0.44074237	1.3132167	0.12142857	0.39190614	1	5074	tags=27%, list=9%, signal=30%
GO_NEGATIVE_REGULATION_BY_HOST_OF_VIRAL_TRANSCRIPTION	GO_NEGATIVE_REGULATION_BY_HOST_OF_VIRAL_TRANSCRIPTION		12	0.51327056	1.3131683	0.1598513	0.3917581	1	5299	tags=33%, list=10%, signal=37%
GO_ACTIVATION_OF_STORE_OPERATED_CALCIUM_CHANNEL_ACTIVITY	GO_ACTIVATION_OF_STORE_OPERATED_CALCIUM_CHANNEL_ACTIVITY		5	0.65442264	1.3129064	0.17726398	0.3919866	1	8377	tags=60%, list=15%, signal=71%
GO_INTERLEUKIN_10_SECRETION	GO_INTERLEUKIN_10_SECRETION		8	0.56528187	1.312774	0.15875912	0.3919941	1	1994	tags=38%, list=4%, signal=39%
GO_POSITIVE_REGULATION_OF_GLYCOPROTEIN_BIOSYNTHETIC_PROCESS	GO_POSITIVE_REGULATION_OF_GLYCOPROTEIN_BIOSYNTHETIC_PROCESS		20	0.50054955	1.3125694	0.15879017	0.39214763	1	6997	tags=35%, list=13%, signal=40%
GO_POSITIVE_REGULATION_OF_DEVELOPMENTAL_PROCESS	GO_POSITIVE_REGULATION_OF_DEVELOPMENTAL_PROCESS		1383	0.33302	1.3122886	0.11971831	0.39245778	1	7831	tags=24%, list=14%, signal=27%
GO_RESPONSE_TO_OXYGEN_CONTAINING_COMPOUND	GO_RESPONSE_TO_OXYGEN_CONTAINING_COMPOUND		1600	0.31760055	1.3122199	0.09677419	0.39234847	1	7432	tags=22%, list=13%, signal=25%
GO_ENDOSOMAL_VESICLE_FUSION	GO_ENDOSOMAL_VESICLE_FUSION		9	0.5972601	1.3119433	0.194	0.39262062	1	10222	tags=67%, list=19%, signal=82%
GO_POSITIVE_REGULATION_OF_TOLL_LIKE_RECEPTOR_3_SIGNALING_PATHWAY	GO_POSITIVE_REGULATION_OF_TOLL_LIKE_RECEPTOR_3_SIGNALING_PATHWAY		7	0.6005284	1.3115743	0.16463415	0.39305824	1	4333	tags=57%, list=8%, signal=62%
GO_EPIDERMIS_MORPHOGENESIS	GO_EPIDERMIS_MORPHOGENESIS		29	0.45846546	1.3115264	0.16778524	0.39289784	1	12908	tags=48%, list=23%, signal=63%
GO_NEGATIVE_REGULATION_OF_GTPASE_ACTIVITY	GO_NEGATIVE_REGULATION_OF_GTPASE_ACTIVITY		47	0.4045995	1.3112249	0.141527	0.39324266	1	7307	tags=32%, list=13%, signal=37%
GO_NEGATIVE_REGULATION_OF_PEPTIDYL_TYROSINE_PHOSPHORYLATION	GO_NEGATIVE_REGULATION_OF_PEPTIDYL_TYROSINE_PHOSPHORYLATION		51	0.38382465	1.3108445	0.13396226	0.3937704	1	5587	tags=27%, list=10%, signal=31%
GO_POSITIVE_REGULATION_OF_STORE_OPERATED_CALCIUM_CHANNEL_ACTIVITY	GO_POSITIVE_REGULATION_OF_STORE_OPERATED_CALCIUM_CHANNEL_ACTIVITY		6	0.6307099	1.310498	0.17714286	0.39417002	1	8377	tags=50%, list=15%, signal=59%
GO_RESPONSE_TO_INTERLEUKIN_1	GO_RESPONSE_TO_INTERLEUKIN_1		194	0.3483856	1.3104802	0.11744387	0.3939598	1	8001	tags=31%, list=14%, signal=37%
GO_NEGATIVE_REGULATION_OF_BONE_REMODELING	GO_NEGATIVE_REGULATION_OF_BONE_REMODELING		14	0.5257705	1.3103986	0.15254237	0.39386064	1	4735	tags=29%, list=9%, signal=31%
GO_EMBRYONIC_HEMOPOIESIS	GO_EMBRYONIC_HEMOPOIESIS		21	0.48925844	1.3103898	0.1747212	0.3936336	1	8497	tags=38%, list=15%, signal=45%
GO_RESPONSE_TO_CORTICOSTEROID	GO_RESPONSE_TO_CORTICOSTEROID		165	0.34161708	1.3103231	0.10766721	0.3935111	1	9327	tags=29%, list=17%, signal=35%
GO_NEGATIVE_REGULATION_OF_ARP2_3_COMPLEX_MEDIATED_ACTIN_NUCLEATION	GO_NEGATIVE_REGULATION_OF_ARP2_3_COMPLEX_MEDIATED_ACTIN_NUCLEATION		6	0.59306055	1.3100092	0.14897579	0.3938394	1	4980	tags=33%, list=9%, signal=37%
GO_CELLULAR_RESPONSE_TO_INTERFERON_BETA	GO_CELLULAR_RESPONSE_TO_INTERFERON_BETA		21	0.4802067	1.3098291	0.1871345	0.39393187	1	2232	tags=24%, list=4%, signal=25%
GO_PROTEIN_LOCALIZATION_TO_GOLGI_APPARATUS	GO_PROTEIN_LOCALIZATION_TO_GOLGI_APPARATUS		27	0.44444662	1.3098235	0.16733068	0.3936957	1	6876	tags=33%, list=12%, signal=38%
GO_ROUNDABOUT_SIGNALING_PATHWAY	GO_ROUNDABOUT_SIGNALING_PATHWAY		7	0.6366656	1.3097615	0.17481203	0.39356697	1	8332	tags=57%, list=15%, signal=67%
GO_REGULATION_OF_CELL_MATRIX_ADHESION	GO_REGULATION_OF_CELL_MATRIX_ADHESION		114	0.39201716	1.309543	0.16791044	0.39376774	1	6866	tags=30%, list=12%, signal=34%
GO_NEGATIVE_REGULATION_OF_DNA_BINDING_TRANSCRIPTION_FACTOR_ACTIVITY	GO_NEGATIVE_REGULATION_OF_DNA_BINDING_TRANSCRIPTION_FACTOR_ACTIVITY		165	0.3461371	1.3094673	0.12431444	0.393679	1	10151	tags=30%, list=18%, signal=36%
GO_PHAGOSOME_MATURATION	GO_PHAGOSOME_MATURATION		44	0.39281356	1.3091683	0.14426878	0.39398345	1	3849	tags=23%, list=7%, signal=24%
GO_INTRACELLULAR_RECEPTOR_SIGNALING_PATHWAY	GO_INTRACELLULAR_RECEPTOR_SIGNALING_PATHWAY		278	0.3557701	1.3090076	0.13919415	0.39405566	1	8629	tags=27%, list=16%, signal=32%
GO_OBSERVATIONAL_LEARNING	GO_OBSERVATIONAL_LEARNING		8	0.5967728	1.308985	0.17843866	0.39385518	1	11659	tags=50%, list=21%, signal=63%
GO_POSITIVE_REGULATION_OF_LONG_TERM_SYNAPTIC_DEPRESSION	GO_POSITIVE_REGULATION_OF_LONG_TERM_SYNAPTIC_DEPRESSION		6	0.70402443	1.3087497	0.15505226	0.394072	1	8853	tags=67%, list=16%, signal=79%
GO_POSITIVE_REGULATION_OF_VASCULAR_SMOOTH_MUSCLE_CELL_PROLIFERATION	GO_POSITIVE_REGULATION_OF_VASCULAR_SMOOTH_MUSCLE_CELL_PROLIFERATION		45	0.4164186	1.3084508	0.1561939	0.39440146	1	10069	tags=31%, list=18%, signal=38%
GO_TRABECULA_MORPHOGENESIS	GO_TRABECULA_MORPHOGENESIS		49	0.4408329	1.3080051	0.16425993	0.3949816	1	5312	tags=27%, list=10%, signal=29%
GO_SEQUESTERING_OF_EXTRACELLULAR_LIGAND_FROM_RECEPTOR	GO_SEQUESTERING_OF_EXTRACELLULAR_LIGAND_FROM_RECEPTOR		9	0.55303735	1.3075695	0.16977613	0.39553934	1	4934	tags=33%, list=9%, signal=37%
GO_MAINTENANCE_OF_CELL_POLARITY	GO_MAINTENANCE_OF_CELL_POLARITY		17	0.48195836	1.3074863	0.16029143	0.39546746	1	9075	tags=41%, list=16%, signal=49%
GO_HEMOGLOBIN_METABOLIC_PROCESS	GO_HEMOGLOBIN_METABOLIC_PROCESS		5	0.6866077	1.3071882	0.17769375	0.39581895	1	9280	tags=40%, list=17%, signal=48%
GO_CELL_PROLIFERATION_INVOLVED_IN_HEART_MORPHOGENESIS	GO_CELL_PROLIFERATION_INVOLVED_IN_HEART_MORPHOGENESIS		18	0.4901977	1.3070363	0.140255	0.39586976	1	5147	tags=33%, list=9%, signal=37%
GO_CELLULAR_RESPONSE_TO_VASCULAR_ENDOTHELIAL_GROWTH_FACTOR_STIMULUS	GO_CELLULAR_RESPONSE_TO_VASCULAR_ENDOTHELIAL_GROWTH_FACTOR_STIMULUS		66	0.39517698	1.3068916	0.15642458	0.39589947	1	12830	tags=41%, list=23%, signal=53%
GO_CELLULAR_RESPONSE_TO_PH	GO_CELLULAR_RESPONSE_TO_PH		21	0.43816096	1.3068082	0.114583336	0.39582002	1	12428	tags=43%, list=23%, signal=55%
GO_NEGATIVE_REGULATION_OF_SMOOTHENED_SIGNALING_PATHWAY_INVOLVED_IN_DORSAL_VENTRAL_NEURAL_TUBE_PATTERNING	GO_NEGATIVE_REGULATION_OF_SMOOTHENED_SIGNALING_PATHWAY_INVOLVED_IN_DORSAL_VENTRAL_NEURAL_TUBE_PATTERNING		6	0.66675925	1.3061656	0.166	0.39682725	1	7524	tags=50%, list=14%, signal=58%
GO_SENSORY_PERCEPTION_OF_PAIN	GO_SENSORY_PERCEPTION_OF_PAIN		103	0.38397574	1.3061279	0.11272141	0.39665827	1	6270	tags=27%, list=11%, signal=31%
GO_DITERPENOID_BIOSYNTHETIC_PROCESS	GO_DITERPENOID_BIOSYNTHETIC_PROCESS		5	0.6746018	1.3060377	0.16871704	0.3965803	1	7385	tags=40%, list=13%, signal=46%
GO_CERAMIDE_BIOSYNTHETIC_PROCESS	GO_CERAMIDE_BIOSYNTHETIC_PROCESS		58	0.37912345	1.3057581	0.10989011	0.39685392	1	8353	tags=28%, list=15%, signal=32%
GO_NEGATIVE_REGULATION_OF_MYOTUBE_DIFFERENTIATION	GO_NEGATIVE_REGULATION_OF_MYOTUBE_DIFFERENTIATION		17	0.5063937	1.305463	0.17708333	0.39714965	1	4192	tags=29%, list=8%, signal=32%
GO_REGULATION_OF_PEPTIDYL_SERINE_PHOSPHORYLATION_OF_STAT_PROTEIN	GO_REGULATION_OF_PEPTIDYL_SERINE_PHOSPHORYLATION_OF_STAT_PROTEIN		23	0.44296712	1.305461	0.14677104	0.39691114	1	9099	tags=26%, list=16%, signal=31%
GO_CYTOSOLIC_CALCIUM_ION_TRANSPORT	GO_CYTOSOLIC_CALCIUM_ION_TRANSPORT		166	0.36802948	1.3052262	0.14333333	0.39714962	1	6544	tags=23%, list=12%, signal=27%
GO_POSITIVE_REGULATION_OF_CHOLESTEROL_EFFLUX	GO_POSITIVE_REGULATION_OF_CHOLESTEROL_EFFLUX		16	0.5007851	1.305116	0.1539855	0.39711937	1	17461	tags=63%, list=32%, signal=91%
GO_POSITIVE_REGULATION_OF_CELL_MIGRATION_INVOLVED_IN_SPROUTING_ANGIOGENESIS	GO_POSITIVE_REGULATION_OF_CELL_MIGRATION_INVOLVED_IN_SPROUTING_ANGIOGENESIS		35	0.42232972	1.3051151	0.15905245	0.39688295	1	11695	tags=43%, list=21%, signal=54%
GO_TUBE_MORPHOGENESIS	GO_TUBE_MORPHOGENESIS		880	0.34248012	1.3051039	0.1528777	0.39666927	1	11233	tags=32%, list=20%, signal=39%
GO_REGULATION_OF_T_HELPER_2_CELL_CYTOKINE_PRODUCTION	GO_REGULATION_OF_T_HELPER_2_CELL_CYTOKINE_PRODUCTION		10	0.57382977	1.3050822	0.16517055	0.3964722	1	8497	tags=50%, list=15%, signal=59%
GO_METANEPHRIC_MESENCHYMAL_CELL_DIFFERENTIATION	GO_METANEPHRIC_MESENCHYMAL_CELL_DIFFERENTIATION		5	0.6613882	1.3050708	0.14387211	0.39625117	1	13750	tags=60%, list=25%, signal=80%
GO_POSITIVE_REGULATION_OF_CIRCADIAN_RHYTHM	GO_POSITIVE_REGULATION_OF_CIRCADIAN_RHYTHM		17	0.51635295	1.305062	0.15343915	0.3960285	1	9602	tags=47%, list=17%, signal=57%
GO_NEGATIVE_REGULATION_OF_CELLULAR_AMIDE_METABOLIC_PROCESS	GO_NEGATIVE_REGULATION_OF_CELLULAR_AMIDE_METABOLIC_PROCESS		207	0.34349817	1.304724	0.15769231	0.39643377	1	8520	tags=27%, list=15%, signal=31%
GO_SPHINGOLIPID_BIOSYNTHETIC_PROCESS	GO_SPHINGOLIPID_BIOSYNTHETIC_PROCESS		102	0.35842192	1.3044069	0.10714286	0.3967908	1	7225	tags=28%, list=13%, signal=33%
GO_NEGATIVE_REGULATION_OF_RESPONSE_TO_STIMULUS	GO_NEGATIVE_REGULATION_OF_RESPONSE_TO_STIMULUS		1616	0.31522223	1.3043997	0.12565444	0.3965595	1	8924	tags=26%, list=16%, signal=30%
GO_MAMMARY_GLAND_EPITHELIAL_CELL_DIFFERENTIATION	GO_MAMMARY_GLAND_EPITHELIAL_CELL_DIFFERENTIATION		17	0.47957784	1.3039072	0.1754386	0.39727542	1	7959	tags=24%, list=14%, signal=27%
GO_NEGATIVE_REGULATION_OF_HUMORAL_IMMUNE_RESPONSE_MEDIATED_BY_CIRCULATING_IMMUNOGLOBULIN	GO_NEGATIVE_REGULATION_OF_HUMORAL_IMMUNE_RESPONSE_MEDIATED_BY_CIRCULATING_IMMUNOGLOBULIN		6	0.6867003	1.3035489	0.1466431	0.39769945	1	1551	tags=50%, list=3%, signal=51%
GO_POSITIVE_REGULATION_OF_DIGESTIVE_SYSTEM_PROCESS	GO_POSITIVE_REGULATION_OF_DIGESTIVE_SYSTEM_PROCESS		11	0.56867814	1.303506	0.16308244	0.39753535	1	2900	tags=27%, list=5%, signal=29%
GO_RECEPTOR_INTERNALIZATION	GO_RECEPTOR_INTERNALIZATION		109	0.37680197	1.3033513	0.12651646	0.39759278	1	8705	tags=31%, list=16%, signal=37%
GO_VESICLE_MEDIATED_TRANSPORT_BETWEEN_ENDOSOMAL_COMPARTMENTS	GO_VESICLE_MEDIATED_TRANSPORT_BETWEEN_ENDOSOMAL_COMPARTMENTS		41	0.41721797	1.3030185	0.1694215	0.39800403	1	6618	tags=27%, list=12%, signal=30%
GO_NEGATIVE_REGULATION_OF_MHC_CLASS_II_BIOSYNTHETIC_PROCESS	GO_NEGATIVE_REGULATION_OF_MHC_CLASS_II_BIOSYNTHETIC_PROCESS		5	0.6648253	1.3029585	0.16791044	0.3978709	1	6122	tags=60%, list=11%, signal=67%
GO_POTASSIUM_ION_EXPORT_ACROSS_PLASMA_MEMBRANE	GO_POTASSIUM_ION_EXPORT_ACROSS_PLASMA_MEMBRANE		18	0.48808342	1.3028913	0.14208633	0.39774626	1	2029	tags=17%, list=4%, signal=17%
GO_NEGATIVE_REGULATION_OF_COLD_INDUCED_THERMOGENESIS	GO_NEGATIVE_REGULATION_OF_COLD_INDUCED_THERMOGENESIS		47	0.40799263	1.3026072	0.14414415	0.3980579	1	10008	tags=36%, list=18%, signal=44%
GO_POSITIVE_REGULATION_OF_ORGANELLE_ASSEMBLY	GO_POSITIVE_REGULATION_OF_ORGANELLE_ASSEMBLY		72	0.40364653	1.3022803	0.17514125	0.39841837	1	8693	tags=31%, list=16%, signal=36%
GO_NEGATIVE_REGULATION_OF_INTERLEUKIN_4_PRODUCTION	GO_NEGATIVE_REGULATION_OF_INTERLEUKIN_4_PRODUCTION		6	0.6264002	1.3022752	0.17761989	0.39818457	1	6104	tags=50%, list=11%, signal=56%
GO_PYRIMIDINE_CONTAINING_COMPOUND_METABOLIC_PROCESS	GO_PYRIMIDINE_CONTAINING_COMPOUND_METABOLIC_PROCESS		24	0.43072194	1.3022658	0.14339623	0.39796183	1	5579	tags=29%, list=10%, signal=32%
GO_EXTRINSIC_APOPTOTIC_SIGNALING_PATHWAY	GO_EXTRINSIC_APOPTOTIC_SIGNALING_PATHWAY		223	0.3345694	1.3022618	0.10051993	0.39772937	1	8822	tags=27%, list=16%, signal=32%
GO_NEGATIVE_REGULATION_OF_NUCLEOCYTOPLASMIC_TRANSPORT	GO_NEGATIVE_REGULATION_OF_NUCLEOCYTOPLASMIC_TRANSPORT		20	0.44248772	1.3021932	0.13909775	0.39761415	1	7650	tags=35%, list=14%, signal=41%
GO_POSITIVE_REGULATION_OF_GLUTAMATE_SECRETION	GO_POSITIVE_REGULATION_OF_GLUTAMATE_SECRETION		10	0.5664965	1.3021219	0.17137809	0.3975135	1	2321	tags=30%, list=4%, signal=31%
GO_EYE_PIGMENTATION	GO_EYE_PIGMENTATION		9	0.57709485	1.3015605	0.14711033	0.39834023	1	9766	tags=56%, list=18%, signal=67%
GO_POSITIVE_REGULATION_OF_MYELOID_CELL_APOPTOTIC_PROCESS	GO_POSITIVE_REGULATION_OF_MYELOID_CELL_APOPTOTIC_PROCESS		8	0.5863268	1.3010384	0.18888889	0.39906937	1	1616	tags=25%, list=3%, signal=26%
GO_EPITHELIAL_CELL_DIFFERENTIATION_INVOLVED_IN_PROSTATE_GLAND_DEVELOPMENT	GO_EPITHELIAL_CELL_DIFFERENTIATION_INVOLVED_IN_PROSTATE_GLAND_DEVELOPMENT		12	0.53477895	1.3006953	0.17877094	0.39948043	1	13794	tags=67%, list=25%, signal=89%
GO_POSITIVE_REGULATION_OF_CHEMOKINE_C_X_C_MOTIF_LIGAND_2_PRODUCTION	GO_POSITIVE_REGULATION_OF_CHEMOKINE_C_X_C_MOTIF_LIGAND_2_PRODUCTION		8	0.5873545	1.3002882	0.1610338	0.40002736	1	8345	tags=63%, list=15%, signal=74%
GO_CELLULAR_RESPONSE_TO_DRUG	GO_CELLULAR_RESPONSE_TO_DRUG		351	0.33657047	1.3002782	0.11795775	0.39980462	1	6873	tags=25%, list=12%, signal=28%
GO_POSITIVE_REGULATION_OF_ACUTE_INFLAMMATORY_RESPONSE_TO_ANTIGENIC_STIMULUS	GO_POSITIVE_REGULATION_OF_ACUTE_INFLAMMATORY_RESPONSE_TO_ANTIGENIC_STIMULUS		8	0.6208008	1.3000159	0.18656716	0.40003642	1	7459	tags=75%, list=14%, signal=87%
GO_CELL_SUBSTRATE_ADHESION	GO_CELL_SUBSTRATE_ADHESION		336	0.3780143	1.2999893	0.16793893	0.39984676	1	7161	tags=26%, list=13%, signal=30%
GO_REGULATION_OF_CELL_DEATH	GO_REGULATION_OF_CELL_DEATH		1688	0.30886048	1.2997614	0.09863946	0.40001804	1	7854	tags=23%, list=14%, signal=26%
GO_POSITIVE_REGULATION_OF_KERATINOCYTE_PROLIFERATION	GO_POSITIVE_REGULATION_OF_KERATINOCYTE_PROLIFERATION		9	0.57534176	1.29954	0.16300367	0.40019044	1	3762	tags=33%, list=7%, signal=36%
GO_HISTONE_H3_K4_TRIMETHYLATION	GO_HISTONE_H3_K4_TRIMETHYLATION		16	0.5547552	1.2992855	0.20576923	0.40043575	1	9455	tags=63%, list=17%, signal=75%
GO_NEGATIVE_REGULATION_OF_PROTEIN_LOCALIZATION_TO_MICROTUBULE	GO_NEGATIVE_REGULATION_OF_PROTEIN_LOCALIZATION_TO_MICROTUBULE		5	0.6289277	1.2992059	0.16698292	0.40037382	1	5553	tags=40%, list=10%, signal=44%
GO_BLOOD_VESSEL_ENDOTHELIAL_CELL_MIGRATION	GO_BLOOD_VESSEL_ENDOTHELIAL_CELL_MIGRATION		162	0.3323675	1.2991948	0.12177122	0.40015256	1	12325	tags=33%, list=22%, signal=42%
GO_POSITIVE_REGULATION_OF_GLOMERULAR_MESANGIAL_CELL_PROLIFERATION	GO_POSITIVE_REGULATION_OF_GLOMERULAR_MESANGIAL_CELL_PROLIFERATION		6	0.6283917	1.2990788	0.16565657	0.40010417	1	7432	tags=67%, list=13%, signal=77%
GO_SMOOTHENED_SIGNALING_PATHWAY_INVOLVED_IN_DORSAL_VENTRAL_NEURAL_TUBE_PATTERNING	GO_SMOOTHENED_SIGNALING_PATHWAY_INVOLVED_IN_DORSAL_VENTRAL_NEURAL_TUBE_PATTERNING		14	0.5724211	1.2986753	0.17635658	0.40065387	1	9860	tags=50%, list=18%, signal=61%
GO_NEGATIVE_REGULATION_OF_ACTIN_FILAMENT_BUNDLE_ASSEMBLY	GO_NEGATIVE_REGULATION_OF_ACTIN_FILAMENT_BUNDLE_ASSEMBLY		26	0.44032422	1.2982951	0.1576087	0.40113664	1	7715	tags=31%, list=14%, signal=36%
GO_REGULATION_OF_SISTER_CHROMATID_COHESION	GO_REGULATION_OF_SISTER_CHROMATID_COHESION		22	0.52914435	1.2982172	0.19056974	0.4010412	1	10008	tags=55%, list=18%, signal=67%
GO_ION_HOMEOSTASIS	GO_ION_HOMEOSTASIS		809	0.32713276	1.2977177	0.10016695	0.40174106	1	6859	tags=22%, list=12%, signal=25%
GO_REGULATION_OF_SODIUM_PROTON_ANTIPORTER_ACTIVITY	GO_REGULATION_OF_SODIUM_PROTON_ANTIPORTER_ACTIVITY		6	0.6186838	1.2974705	0.14102565	0.401972	1	5446	tags=33%, list=10%, signal=37%
GO_PHOSPHATIDIC_ACID_BIOSYNTHETIC_PROCESS	GO_PHOSPHATIDIC_ACID_BIOSYNTHETIC_PROCESS		42	0.388507	1.2970891	0.12854758	0.40242258	1	5449	tags=21%, list=10%, signal=24%
GO_CELLULAR_RESPONSE_TO_PEPTIDE	GO_CELLULAR_RESPONSE_TO_PEPTIDE		375	0.33399242	1.2970171	0.14059754	0.40232152	1	8856	tags=26%, list=16%, signal=31%
GO_POSTSYNAPTIC_MODULATION_OF_CHEMICAL_SYNAPTIC_TRANSMISSION	GO_POSTSYNAPTIC_MODULATION_OF_CHEMICAL_SYNAPTIC_TRANSMISSION		17	0.45183906	1.2969013	0.14017095	0.40229744	1	5942	tags=24%, list=11%, signal=26%
GO_DIET_INDUCED_THERMOGENESIS	GO_DIET_INDUCED_THERMOGENESIS		9	0.574695	1.296757	0.15949821	0.40232626	1	14433	tags=67%, list=26%, signal=90%
GO_REGULATION_OF_OLIGODENDROCYTE_DIFFERENTIATION	GO_REGULATION_OF_OLIGODENDROCYTE_DIFFERENTIATION		32	0.43945986	1.2962145	0.15485075	0.40309826	1	5728	tags=25%, list=10%, signal=28%
GO_REGULATION_OF_CELL_DIFFERENTIATION	GO_REGULATION_OF_CELL_DIFFERENTIATION		1835	0.32306606	1.2953949	0.15104167	0.4044087	1	8820	tags=25%, list=16%, signal=29%
GO_NEGATIVE_REGULATION_OF_INFLAMMATORY_RESPONSE_TO_ANTIGENIC_STIMULUS	GO_NEGATIVE_REGULATION_OF_INFLAMMATORY_RESPONSE_TO_ANTIGENIC_STIMULUS		12	0.5159369	1.2952876	0.17454545	0.40435547	1	8642	tags=50%, list=16%, signal=59%
GO_REGULATION_OF_EPITHELIAL_CELL_MIGRATION	GO_REGULATION_OF_EPITHELIAL_CELL_MIGRATION		264	0.33733645	1.2951108	0.15036231	0.40444356	1	12325	tags=36%, list=22%, signal=46%
GO_POSITIVE_REGULATION_OF_PROTEIN_POLYMERIZATION	GO_POSITIVE_REGULATION_OF_PROTEIN_POLYMERIZATION		134	0.3375952	1.2948315	0.13321167	0.40474218	1	6463	tags=21%, list=12%, signal=24%
GO_RESPONSE_TO_INTERFERON_BETA	GO_RESPONSE_TO_INTERFERON_BETA		29	0.47569913	1.2943282	0.19411765	0.4054829	1	7014	tags=34%, list=13%, signal=39%
GO_REGULATION_OF_HIGH_DENSITY_LIPOPROTEIN_PARTICLE_CLEARANCE	GO_REGULATION_OF_HIGH_DENSITY_LIPOPROTEIN_PARTICLE_CLEARANCE		6	0.6481334	1.2942982	0.1703204	0.40529805	1	18946	tags=83%, list=34%, signal=127%
GO_REGULATION_OF_MDA_5_SIGNALING_PATHWAY	GO_REGULATION_OF_MDA_5_SIGNALING_PATHWAY		7	0.5965187	1.2941283	0.17590822	0.40538752	1	4969	tags=43%, list=9%, signal=47%
GO_POSITIVE_REGULATION_OF_MACROPHAGE_DIFFERENTIATION	GO_POSITIVE_REGULATION_OF_MACROPHAGE_DIFFERENTIATION		13	0.514789	1.2939552	0.18939394	0.4054949	1	10008	tags=46%, list=18%, signal=56%
GO_NIK_NF_KAPPAB_SIGNALING	GO_NIK_NF_KAPPAB_SIGNALING		172	0.3392678	1.2937723	0.11986301	0.4056097	1	7207	tags=27%, list=13%, signal=31%
GO_CELLULAR_RESPONSE_TO_REACTIVE_OXYGEN_SPECIES	GO_CELLULAR_RESPONSE_TO_REACTIVE_OXYGEN_SPECIES		159	0.34072113	1.2936518	0.10992908	0.4055972	1	8566	tags=30%, list=16%, signal=35%
GO_REGULATION_OF_OSTEOBLAST_DIFFERENTIATION	GO_REGULATION_OF_OSTEOBLAST_DIFFERENTIATION		116	0.37614146	1.2932868	0.1598579	0.40602434	1	12612	tags=36%, list=23%, signal=47%
GO_BLOOD_VESSEL_REMODELING	GO_BLOOD_VESSEL_REMODELING		38	0.43877995	1.2929634	0.17286246	0.40636277	1	5046	tags=26%, list=9%, signal=29%
GO_POLYOL_BIOSYNTHETIC_PROCESS	GO_POLYOL_BIOSYNTHETIC_PROCESS		76	0.3612033	1.2925627	0.11443662	0.40688747	1	5593	tags=22%, list=10%, signal=25%
GO_METHYLATION_DEPENDENT_CHROMATIN_SILENCING	GO_METHYLATION_DEPENDENT_CHROMATIN_SILENCING		26	0.47497416	1.2924865	0.16438356	0.40680066	1	18328	tags=62%, list=33%, signal=92%
GO_MONOAMINE_TRANSPORT	GO_MONOAMINE_TRANSPORT		89	0.38545564	1.2921166	0.120192304	0.4072474	1	4672	tags=22%, list=8%, signal=25%
GO_REGULATION_OF_PROTEIN_LOCALIZATION	GO_REGULATION_OF_PROTEIN_LOCALIZATION		981	0.31655017	1.2918973	0.11578947	0.40742064	1	9044	tags=25%, list=16%, signal=30%
GO_LUNG_SECRETORY_CELL_DIFFERENTIATION	GO_LUNG_SECRETORY_CELL_DIFFERENTIATION		10	0.5685765	1.2918007	0.17487267	0.40737125	1	6840	tags=40%, list=12%, signal=46%
GO_POSITIVE_REGULATION_OF_POSTTRANSCRIPTIONAL_GENE_SILENCING	GO_POSITIVE_REGULATION_OF_POSTTRANSCRIPTIONAL_GENE_SILENCING		23	0.48829076	1.2914999	0.1730419	0.4076877	1	6592	tags=43%, list=12%, signal=49%
GO_REGULATION_OF_GENE_EXPRESSION_BY_GENETIC_IMPRINTING	GO_REGULATION_OF_GENE_EXPRESSION_BY_GENETIC_IMPRINTING		18	0.51190084	1.2913972	0.17375231	0.40766934	1	18799	tags=72%, list=34%, signal=109%
GO_ACTIN_POLYMERIZATION_OR_DEPOLYMERIZATION	GO_ACTIN_POLYMERIZATION_OR_DEPOLYMERIZATION		205	0.33448002	1.2911272	0.13743219	0.40794444	1	6820	tags=21%, list=12%, signal=24%
GO_RESPONSE_TO_IMMUNE_RESPONSE_OF_OTHER_ORGANISM_INVOLVED_IN_SYMBIOTIC_INTERACTION	GO_RESPONSE_TO_IMMUNE_RESPONSE_OF_OTHER_ORGANISM_INVOLVED_IN_SYMBIOTIC_INTERACTION		5	0.63660794	1.2906873	0.16387337	0.40855286	1	8589	tags=60%, list=16%, signal=71%
GO_NEGATIVE_REGULATION_OF_G_PROTEIN_COUPLED_RECEPTOR_SIGNALING_PATHWAY	GO_NEGATIVE_REGULATION_OF_G_PROTEIN_COUPLED_RECEPTOR_SIGNALING_PATHWAY		49	0.39622205	1.2904865	0.13811189	0.40871307	1	11250	tags=43%, list=20%, signal=54%
GO_NEGATIVE_REGULATION_OF_ASTROCYTE_DIFFERENTIATION	GO_NEGATIVE_REGULATION_OF_ASTROCYTE_DIFFERENTIATION		14	0.48962983	1.2903587	0.15870307	0.40872762	1	7138	tags=36%, list=13%, signal=41%
GO_REGULATION_OF_LYMPHOID_PROGENITOR_CELL_DIFFERENTIATION	GO_REGULATION_OF_LYMPHOID_PROGENITOR_CELL_DIFFERENTIATION		8	0.5890835	1.2902036	0.2035928	0.40879875	1	5199	tags=38%, list=9%, signal=41%
GO_XENOPHAGY	GO_XENOPHAGY		10	0.5336121	1.289173	0.14648438	0.41056597	1	10649	tags=40%, list=19%, signal=50%
GO_REGULATION_OF_ALKALINE_PHOSPHATASE_ACTIVITY	GO_REGULATION_OF_ALKALINE_PHOSPHATASE_ACTIVITY		9	0.5748527	1.2891378	0.18165137	0.41039526	1	8856	tags=44%, list=16%, signal=53%
GO_REGULATION_OF_ODONTOGENESIS	GO_REGULATION_OF_ODONTOGENESIS		26	0.45615813	1.2890867	0.15862069	0.41025296	1	7805	tags=31%, list=14%, signal=36%
GO_RESPONSE_TO_WOUNDING	GO_RESPONSE_TO_WOUNDING		665	0.32486957	1.2885405	0.15198618	0.4110179	1	6455	tags=21%, list=12%, signal=24%
GO_FATTY_ACID_TRANSPORT	GO_FATTY_ACID_TRANSPORT		96	0.35598096	1.288445	0.124797404	0.41094482	1	8374	tags=29%, list=15%, signal=34%
GO_NEGATIVE_REGULATION_OF_DNA_DEPENDENT_DNA_REPLICATION	GO_NEGATIVE_REGULATION_OF_DNA_DEPENDENT_DNA_REPLICATION		25	0.5437609	1.2883368	0.2205029	0.41092864	1	9239	tags=40%, list=17%, signal=48%
GO_VESTIBULOCOCHLEAR_NERVE_DEVELOPMENT	GO_VESTIBULOCOCHLEAR_NERVE_DEVELOPMENT		9	0.58186823	1.288264	0.16780822	0.41082793	1	3805	tags=22%, list=7%, signal=24%
GO_HISTONE_H3_K9_ACETYLATION	GO_HISTONE_H3_K9_ACETYLATION		12	0.53887314	1.2879323	0.17836812	0.41119123	1	8497	tags=42%, list=15%, signal=49%
GO_POSITIVE_REGULATION_OF_CYSTEINE_TYPE_ENDOPEPTIDASE_ACTIVITY	GO_POSITIVE_REGULATION_OF_CYSTEINE_TYPE_ENDOPEPTIDASE_ACTIVITY		141	0.33529568	1.2878665	0.13660245	0.41107127	1	8715	tags=30%, list=16%, signal=36%
GO_NEGATIVE_REGULATION_OF_EXTRINSIC_APOPTOTIC_SIGNALING_PATHWAY_VIA_DEATH_DOMAIN_RECEPTORS	GO_NEGATIVE_REGULATION_OF_EXTRINSIC_APOPTOTIC_SIGNALING_PATHWAY_VIA_DEATH_DOMAIN_RECEPTORS		37	0.42044473	1.2875679	0.16431095	0.41138533	1	5649	tags=27%, list=10%, signal=30%
GO_CELL_MOTILITY_INVOLVED_IN_CEREBRAL_CORTEX_RADIAL_GLIA_GUIDED_MIGRATION	GO_CELL_MOTILITY_INVOLVED_IN_CEREBRAL_CORTEX_RADIAL_GLIA_GUIDED_MIGRATION		7	0.6484993	1.2875243	0.20315582	0.41123465	1	8807	tags=57%, list=16%, signal=68%
GO_NEGATIVE_REGULATION_OF_MUSCLE_CELL_DIFFERENTIATION	GO_NEGATIVE_REGULATION_OF_MUSCLE_CELL_DIFFERENTIATION		62	0.386316	1.287291	0.15978456	0.41147363	1	11019	tags=35%, list=20%, signal=44%
GO_NEGATIVE_REGULATION_OF_DEFENSE_RESPONSE_TO_VIRUS	GO_NEGATIVE_REGULATION_OF_DEFENSE_RESPONSE_TO_VIRUS		22	0.44416457	1.2871714	0.1611002	0.4114483	1	2046	tags=23%, list=4%, signal=24%
GO_NEGATIVE_REGULATION_OF_ENDOCYTOSIS	GO_NEGATIVE_REGULATION_OF_ENDOCYTOSIS		44	0.38471273	1.2871135	0.12410072	0.41131866	1	8915	tags=32%, list=16%, signal=38%
GO_EMBRYONIC_EYE_MORPHOGENESIS	GO_EMBRYONIC_EYE_MORPHOGENESIS		34	0.46536905	1.286891	0.16637781	0.4115088	1	9187	tags=32%, list=17%, signal=39%
GO_IMMATURE_B_CELL_DIFFERENTIATION	GO_IMMATURE_B_CELL_DIFFERENTIATION		9	0.58657455	1.2863725	0.18908381	0.4122795	1	9035	tags=56%, list=16%, signal=66%
GO_MYOFIBROBLAST_DIFFERENTIATION	GO_MYOFIBROBLAST_DIFFERENTIATION		5	0.6978906	1.2863387	0.15212981	0.41210788	1	16674	tags=80%, list=30%, signal=115%
GO_NEGATIVE_REGULATION_OF_DEVELOPMENTAL_PROCESS	GO_NEGATIVE_REGULATION_OF_DEVELOPMENTAL_PROCESS		994	0.32163072	1.2862841	0.1507799	0.4119664	1	11283	tags=29%, list=20%, signal=36%
GO_WOUND_HEALING	GO_WOUND_HEALING		549	0.32988176	1.2857981	0.15017667	0.41267064	1	6337	tags=21%, list=11%, signal=24%
GO_REGULATION_OF_NEUROTROPHIN_TRK_RECEPTOR_SIGNALING_PATHWAY	GO_REGULATION_OF_NEUROTROPHIN_TRK_RECEPTOR_SIGNALING_PATHWAY		13	0.52626014	1.2855294	0.18845502	0.41292527	1	18948	tags=69%, list=34%, signal=105%
GO_HISTONE_H3_K27_DEMETHYLATION	GO_HISTONE_H3_K27_DEMETHYLATION		5	0.6811968	1.2852756	0.20622568	0.41316384	1	4942	tags=40%, list=9%, signal=44%
GO_MODIFICATION_BY_SYMBIONT_OF_HOST_MORPHOLOGY_OR_PHYSIOLOGY	GO_MODIFICATION_BY_SYMBIONT_OF_HOST_MORPHOLOGY_OR_PHYSIOLOGY		45	0.39136684	1.2850534	0.16666667	0.41331652	1	5615	tags=24%, list=10%, signal=27%
GO_MYOBLAST_DIFFERENTIATION	GO_MYOBLAST_DIFFERENTIATION		83	0.3739899	1.284627	0.14475873	0.413926	1	11014	tags=35%, list=20%, signal=44%
GO_POSITIVE_REGULATION_OF_DEPHOSPHORYLATION	GO_POSITIVE_REGULATION_OF_DEPHOSPHORYLATION		54	0.38822174	1.2845839	0.15384616	0.41378644	1	7029	tags=24%, list=13%, signal=28%
GO_RESPONSE_TO_GLUCAGON	GO_RESPONSE_TO_GLUCAGON		36	0.4237767	1.2842314	0.17206132	0.41422078	1	14076	tags=44%, list=26%, signal=60%
GO_INTERLEUKIN_7_MEDIATED_SIGNALING_PATHWAY	GO_INTERLEUKIN_7_MEDIATED_SIGNALING_PATHWAY		30	0.45755535	1.2841849	0.1880651	0.41406578	1	5137	tags=30%, list=9%, signal=33%
GO_POSITIVE_REGULATION_OF_DNA_BINDING	GO_POSITIVE_REGULATION_OF_DNA_BINDING		60	0.36827463	1.2841847	0.12157534	0.41382796	1	5147	tags=22%, list=9%, signal=24%
GO_ANTIMICROBIAL_PEPTIDE_PRODUCTION	GO_ANTIMICROBIAL_PEPTIDE_PRODUCTION		6	0.6524362	1.2840956	0.1891892	0.41376606	1	6125	tags=50%, list=11%, signal=56%
GO_PURINE_NUCLEOSIDE_DIPHOSPHATE_METABOLIC_PROCESS	GO_PURINE_NUCLEOSIDE_DIPHOSPHATE_METABOLIC_PROCESS		11	0.5209478	1.2840297	0.16179337	0.41365954	1	14723	tags=64%, list=27%, signal=87%
GO_NEGATIVE_REGULATION_OF_CREB_TRANSCRIPTION_FACTOR_ACTIVITY	GO_NEGATIVE_REGULATION_OF_CREB_TRANSCRIPTION_FACTOR_ACTIVITY		6	0.59868973	1.2838316	0.18131869	0.4138011	1	254	tags=17%, list=0%, signal=17%
GO_PHOSPHATIDYLETHANOLAMINE_BIOSYNTHETIC_PROCESS	GO_PHOSPHATIDYLETHANOLAMINE_BIOSYNTHETIC_PROCESS		15	0.5170397	1.283738	0.17805755	0.41374117	1	504	tags=13%, list=1%, signal=13%
GO_POSITIVE_REGULATION_OF_RECEPTOR_MEDIATED_ENDOCYTOSIS	GO_POSITIVE_REGULATION_OF_RECEPTOR_MEDIATED_ENDOCYTOSIS		51	0.3945901	1.2837315	0.19314079	0.41351467	1	8369	tags=35%, list=15%, signal=42%
GO_AMYLOID_BETA_CLEARANCE	GO_AMYLOID_BETA_CLEARANCE		31	0.44065085	1.2834324	0.20318726	0.413847	1	6692	tags=32%, list=12%, signal=37%
GO_CIRCADIAN_SLEEP_WAKE_CYCLE_NON_REM_SLEEP	GO_CIRCADIAN_SLEEP_WAKE_CYCLE_NON_REM_SLEEP		9	0.6004772	1.2833803	0.20588236	0.41370195	1	3839	tags=44%, list=7%, signal=48%
GO_POSITIVE_REGULATION_OF_BLOOD_VESSEL_ENDOTHELIAL_CELL_MIGRATION	GO_POSITIVE_REGULATION_OF_BLOOD_VESSEL_ENDOTHELIAL_CELL_MIGRATION		74	0.37240413	1.2831492	0.14134276	0.4138991	1	12325	tags=38%, list=22%, signal=49%
GO_MYOBLAST_FUSION	GO_MYOBLAST_FUSION		38	0.4480893	1.2827071	0.18485916	0.41450873	1	4414	tags=26%, list=8%, signal=29%
GO_HEPARIN_BIOSYNTHETIC_PROCESS	GO_HEPARIN_BIOSYNTHETIC_PROCESS		8	0.58207405	1.2825502	0.1615245	0.41461316	1	7650	tags=63%, list=14%, signal=73%
GO_REGULATION_OF_TRANSPORT	GO_REGULATION_OF_TRANSPORT		1822	0.31272948	1.2825022	0.11833333	0.41449153	1	8924	tags=25%, list=16%, signal=28%
GO_REGULATION_OF_PROTEIN_MODIFICATION_PROCESS	GO_REGULATION_OF_PROTEIN_MODIFICATION_PROCESS		1817	0.3154871	1.2823058	0.14056939	0.41464382	1	8092	tags=24%, list=15%, signal=28%
GO_RIBONUCLEOSIDE_CATABOLIC_PROCESS	GO_RIBONUCLEOSIDE_CATABOLIC_PROCESS		21	0.47372785	1.2817836	0.22103387	0.41542283	1	4326	tags=33%, list=8%, signal=36%
GO_MONOCYTE_CHEMOTACTIC_PROTEIN_1_PRODUCTION	GO_MONOCYTE_CHEMOTACTIC_PROTEIN_1_PRODUCTION		14	0.48206222	1.2817507	0.17636986	0.4152455	1	3794	tags=29%, list=7%, signal=31%
GO_POSITIVE_REGULATION_OF_MUCUS_SECRETION	GO_POSITIVE_REGULATION_OF_MUCUS_SECRETION		6	0.5841852	1.2815331	0.15860735	0.41541028	1	298	tags=17%, list=1%, signal=17%
GO_REGULATION_OF_RESPONSE_TO_OXIDATIVE_STRESS	GO_REGULATION_OF_RESPONSE_TO_OXIDATIVE_STRESS		82	0.35758212	1.281145	0.14548802	0.4159512	1	8915	tags=34%, list=16%, signal=41%
GO_NEGATIVE_REGULATION_OF_ERK1_AND_ERK2_CASCADE	GO_NEGATIVE_REGULATION_OF_ERK1_AND_ERK2_CASCADE		71	0.36639813	1.280967	0.14745763	0.41604245	1	10182	tags=35%, list=18%, signal=43%
GO_HISTONE_DEPHOSPHORYLATION	GO_HISTONE_DEPHOSPHORYLATION		5	0.65661377	1.2808917	0.18647167	0.41594973	1	14587	tags=60%, list=26%, signal=82%
GO_HOMEOSTATIC_PROCESS	GO_HOMEOSTATIC_PROCESS		1902	0.31016874	1.280011	0.11912752	0.4173569	1	6859	tags=21%, list=12%, signal=23%
GO_REGULATION_OF_TRANSFERASE_ACTIVITY	GO_REGULATION_OF_TRANSFERASE_ACTIVITY		950	0.32320726	1.27991	0.12544803	0.41731915	1	7435	tags=23%, list=13%, signal=27%
GO_POSITIVE_REGULATION_OF_RECEPTOR_INTERNALIZATION	GO_POSITIVE_REGULATION_OF_RECEPTOR_INTERNALIZATION		24	0.45203048	1.279655	0.18231046	0.417575	1	8369	tags=42%, list=15%, signal=49%
GO_POSITIVE_REGULATION_OF_MULTI_ORGANISM_PROCESS	GO_POSITIVE_REGULATION_OF_MULTI_ORGANISM_PROCESS		183	0.3239616	1.279566	0.13248639	0.41749993	1	6358	tags=25%, list=12%, signal=28%
GO_ACTIN_CYTOSKELETON_REORGANIZATION	GO_ACTIN_CYTOSKELETON_REORGANIZATION		97	0.36528084	1.2792118	0.16726619	0.41796032	1	8214	tags=26%, list=15%, signal=30%
GO_REGULATION_OF_EPITHELIAL_CELL_APOPTOTIC_PROCESS	GO_REGULATION_OF_EPITHELIAL_CELL_APOPTOTIC_PROCESS		84	0.36688733	1.2790201	0.15441176	0.41809505	1	8705	tags=26%, list=16%, signal=31%
GO_POSITIVE_REGULATION_OF_VIRAL_GENOME_REPLICATION	GO_POSITIVE_REGULATION_OF_VIRAL_GENOME_REPLICATION		35	0.44074777	1.2789545	0.20454545	0.41797766	1	2926	tags=26%, list=5%, signal=27%
GO_POSITIVE_REGULATION_OF_PRI_MIRNA_TRANSCRIPTION_BY_RNA_POLYMERASE_II	GO_POSITIVE_REGULATION_OF_PRI_MIRNA_TRANSCRIPTION_BY_RNA_POLYMERASE_II		29	0.44233498	1.2786642	0.17009346	0.41828594	1	10069	tags=38%, list=18%, signal=46%
GO_POSITIVE_REGULATION_OF_EPITHELIAL_CELL_DIFFERENTIATION	GO_POSITIVE_REGULATION_OF_EPITHELIAL_CELL_DIFFERENTIATION		64	0.35931396	1.2782656	0.14405361	0.41877148	1	15514	tags=44%, list=28%, signal=61%
GO_CELL_PROLIFERATION_INVOLVED_IN_KIDNEY_DEVELOPMENT	GO_CELL_PROLIFERATION_INVOLVED_IN_KIDNEY_DEVELOPMENT		21	0.47262624	1.2777908	0.15097691	0.41944328	1	8497	tags=33%, list=15%, signal=39%
GO_FILOPODIUM_ASSEMBLY	GO_FILOPODIUM_ASSEMBLY		58	0.38945687	1.2774625	0.17090909	0.41983387	1	2580	tags=16%, list=5%, signal=16%
GO_REGULATION_OF_DENDRITIC_CELL_CHEMOTAXIS	GO_REGULATION_OF_DENDRITIC_CELL_CHEMOTAXIS		9	0.58578014	1.2773435	0.19964664	0.41982293	1	6216	tags=56%, list=11%, signal=63%
GO_POSITIVE_REGULATION_OF_CYSTEINE_TYPE_ENDOPEPTIDASE_ACTIVITY_INVOLVED_IN_APOPTOTIC_SIGNALING_PATHWAY	GO_POSITIVE_REGULATION_OF_CYSTEINE_TYPE_ENDOPEPTIDASE_ACTIVITY_INVOLVED_IN_APOPTOTIC_SIGNALING_PATHWAY		11	0.53876126	1.2772552	0.19003691	0.41975677	1	2357	tags=27%, list=4%, signal=28%
GO_REGULATION_OF_LIPASE_ACTIVITY	GO_REGULATION_OF_LIPASE_ACTIVITY		97	0.37004033	1.2766497	0.16869566	0.42062417	1	16126	tags=44%, list=29%, signal=63%
GO_REGULATION_OF_PROTEIN_TYROSINE_PHOSPHATASE_ACTIVITY	GO_REGULATION_OF_PROTEIN_TYROSINE_PHOSPHATASE_ACTIVITY		5	0.66885775	1.2766368	0.19642857	0.42040697	1	72	tags=20%, list=0%, signal=20%
GO_NEGATIVE_REGULATION_OF_MYOBLAST_DIFFERENTIATION	GO_NEGATIVE_REGULATION_OF_MYOBLAST_DIFFERENTIATION		24	0.4255794	1.2763734	0.14117648	0.42070132	1	13498	tags=42%, list=24%, signal=55%
GO_NEGATIVE_REGULATION_OF_MYELOID_CELL_DIFFERENTIATION	GO_NEGATIVE_REGULATION_OF_MYELOID_CELL_DIFFERENTIATION		92	0.35124528	1.2762643	0.13427562	0.42066133	1	6973	tags=25%, list=13%, signal=29%
GO_SEQUESTERING_OF_CALCIUM_ION	GO_SEQUESTERING_OF_CALCIUM_ION		127	0.3780926	1.2762214	0.17820069	0.42049414	1	6544	tags=25%, list=12%, signal=29%
GO_CARDIOBLAST_DIFFERENTIATION	GO_CARDIOBLAST_DIFFERENTIATION		19	0.4941554	1.2762098	0.1878453	0.42028865	1	6840	tags=32%, list=12%, signal=36%
GO_GLIAL_CELL_MIGRATION	GO_GLIAL_CELL_MIGRATION		50	0.41429773	1.2760668	0.1812977	0.42035106	1	8807	tags=28%, list=16%, signal=33%
GO_POSITIVE_REGULATION_OF_CHROMATIN_SILENCING	GO_POSITIVE_REGULATION_OF_CHROMATIN_SILENCING		14	0.5622073	1.2760314	0.22954091	0.42017165	1	14852	tags=71%, list=27%, signal=98%
GO_ENDOTHELIAL_CELL_DEVELOPMENT	GO_ENDOTHELIAL_CELL_DEVELOPMENT		59	0.40454423	1.2757454	0.17915905	0.4204472	1	4283	tags=22%, list=8%, signal=24%
GO_POSITIVE_REGULATION_OF_RESPONSE_TO_WOUNDING	GO_POSITIVE_REGULATION_OF_RESPONSE_TO_WOUNDING		67	0.38262698	1.2756919	0.14990859	0.42030618	1	5781	tags=22%, list=10%, signal=25%
GO_REGULATION_OF_METHYLATION_DEPENDENT_CHROMATIN_SILENCING	GO_REGULATION_OF_METHYLATION_DEPENDENT_CHROMATIN_SILENCING		13	0.53762984	1.2753665	0.2007435	0.42066187	1	13103	tags=54%, list=24%, signal=71%
GO_NEGATIVE_REGULATION_OF_SYNAPTIC_TRANSMISSION	GO_NEGATIVE_REGULATION_OF_SYNAPTIC_TRANSMISSION		70	0.39877433	1.2753153	0.16695353	0.42052147	1	8853	tags=33%, list=16%, signal=39%
GO_MIRNA_MEDIATED_INHIBITION_OF_TRANSLATION	GO_MIRNA_MEDIATED_INHIBITION_OF_TRANSLATION		76	0.341783	1.2753034	0.15749526	0.42030922	1	11207	tags=24%, list=20%, signal=30%
GO_BEHAVIORAL_RESPONSE_TO_ETHANOL	GO_BEHAVIORAL_RESPONSE_TO_ETHANOL		10	0.5625403	1.2751951	0.16779661	0.42029214	1	277	tags=10%, list=1%, signal=10%
GO_POSITIVE_REGULATION_OF_PHAGOCYTOSIS_ENGULFMENT	GO_POSITIVE_REGULATION_OF_PHAGOCYTOSIS_ENGULFMENT		12	0.5341841	1.2749081	0.18199609	0.42061308	1	6692	tags=33%, list=12%, signal=38%
GO_PANCREATIC_JUICE_SECRETION	GO_PANCREATIC_JUICE_SECRETION		13	0.48852766	1.2748262	0.1576087	0.42053768	1	9631	tags=46%, list=17%, signal=56%
GO_GASTRIC_MOTILITY	GO_GASTRIC_MOTILITY		7	0.60102767	1.2746629	0.17595819	0.4206322	1	1559	tags=43%, list=3%, signal=44%
GO_MEDIUM_CHAIN_FATTY_ACID_CATABOLIC_PROCESS	GO_MEDIUM_CHAIN_FATTY_ACID_CATABOLIC_PROCESS		5	0.66720456	1.2742461	0.17624521	0.4211895	1	14799	tags=60%, list=27%, signal=82%
GO_NEGATIVE_REGULATION_OF_CALCIUM_ION_DEPENDENT_EXOCYTOSIS	GO_NEGATIVE_REGULATION_OF_CALCIUM_ION_DEPENDENT_EXOCYTOSIS		12	0.5360771	1.2741399	0.18846154	0.4211429	1	8867	tags=42%, list=16%, signal=50%
GO_REGULATION_OF_MAST_CELL_CYTOKINE_PRODUCTION	GO_REGULATION_OF_MAST_CELL_CYTOKINE_PRODUCTION		5	0.6481517	1.2736156	0.1922366	0.42188004	1	4521	tags=40%, list=8%, signal=44%
GO_CELLULAR_RESPONSE_TO_PEPTIDE_HORMONE_STIMULUS	GO_CELLULAR_RESPONSE_TO_PEPTIDE_HORMONE_STIMULUS		313	0.32997355	1.2734843	0.15570934	0.42189625	1	8856	tags=26%, list=16%, signal=31%
GO_HISTONE_H3_K9_TRIMETHYLATION	GO_HISTONE_H3_K9_TRIMETHYLATION		17	0.509394	1.2732975	0.20408164	0.42201182	1	15347	tags=65%, list=28%, signal=90%
GO_POSITIVE_REGULATION_OF_TRANSCRIPTION_BY_RNA_POLYMERASE_II	GO_POSITIVE_REGULATION_OF_TRANSCRIPTION_BY_RNA_POLYMERASE_II		1180	0.33878037	1.2728105	0.17615658	0.42271346	1	7831	tags=25%, list=14%, signal=29%
GO_LAMELLIPODIUM_ASSEMBLY	GO_LAMELLIPODIUM_ASSEMBLY		66	0.38028446	1.2727776	0.18621974	0.42253852	1	13772	tags=39%, list=25%, signal=52%
GO_REGULATION_OF_PEPTIDYL_CYSTEINE_S_NITROSYLATION	GO_REGULATION_OF_PEPTIDYL_CYSTEINE_S_NITROSYLATION		9	0.5358515	1.2725519	0.1904762	0.4227621	1	5840	tags=44%, list=11%, signal=50%
GO_RETINAL_BIPOLAR_NEURON_DIFFERENTIATION	GO_RETINAL_BIPOLAR_NEURON_DIFFERENTIATION		5	0.6784459	1.2724898	0.17592593	0.42263997	1	13350	tags=80%, list=24%, signal=106%
GO_NEGATIVE_REGULATION_OF_CELL_DIFFERENTIATION	GO_NEGATIVE_REGULATION_OF_CELL_DIFFERENTIATION		725	0.3245437	1.2722713	0.1579861	0.4228291	1	11019	tags=29%, list=20%, signal=36%
GO_MRNA_3_SPLICE_SITE_RECOGNITION	GO_MRNA_3_SPLICE_SITE_RECOGNITION		6	0.6508053	1.2720352	0.20850202	0.4230569	1	8565	tags=50%, list=16%, signal=59%
GO_INTERKINETIC_NUCLEAR_MIGRATION	GO_INTERKINETIC_NUCLEAR_MIGRATION		5	0.69682145	1.2719004	0.19557196	0.42308393	1	16734	tags=100%, list=30%, signal=144%
GO_LEUKOTRIENE_BIOSYNTHETIC_PROCESS	GO_LEUKOTRIENE_BIOSYNTHETIC_PROCESS		10	0.5445249	1.2718227	0.20887245	0.42301598	1	4371	tags=40%, list=8%, signal=43%
GO_REGULATION_OF_CELL_SUBSTRATE_ADHESION	GO_REGULATION_OF_CELL_SUBSTRATE_ADHESION		207	0.37074515	1.2712635	0.18867925	0.42388093	1	6544	tags=26%, list=12%, signal=29%
GO_CYCLOOXYGENASE_PATHWAY	GO_CYCLOOXYGENASE_PATHWAY		11	0.520172	1.2711623	0.20373832	0.4238573	1	4095	tags=36%, list=7%, signal=39%
GO_MONOUBIQUITINATED_PROTEIN_DEUBIQUITINATION	GO_MONOUBIQUITINATED_PROTEIN_DEUBIQUITINATION		10	0.5792584	1.2709472	0.218107	0.4240672	1	6027	tags=40%, list=11%, signal=45%
GO_ACTIVATION_OF_CYSTEINE_TYPE_ENDOPEPTIDASE_ACTIVITY_INVOLVED_IN_APOPTOTIC_PROCESS	GO_ACTIVATION_OF_CYSTEINE_TYPE_ENDOPEPTIDASE_ACTIVITY_INVOLVED_IN_APOPTOTIC_PROCESS		83	0.3575199	1.2708223	0.16521738	0.4240894	1	8504	tags=33%, list=15%, signal=38%
GO_CELL_MIGRATION_INVOLVED_IN_SPROUTING_ANGIOGENESIS	GO_CELL_MIGRATION_INVOLVED_IN_SPROUTING_ANGIOGENESIS		89	0.35735938	1.2707516	0.18796992	0.42397878	1	11820	tags=35%, list=21%, signal=44%
GO_REGULATION_OF_CALCIDIOL_1_MONOOXYGENASE_ACTIVITY	GO_REGULATION_OF_CALCIDIOL_1_MONOOXYGENASE_ACTIVITY		7	0.6211738	1.2703451	0.22580644	0.42451295	1	8345	tags=43%, list=15%, signal=50%
GO_CELL_VOLUME_HOMEOSTASIS	GO_CELL_VOLUME_HOMEOSTASIS		28	0.44561392	1.2699491	0.19029851	0.42504978	1	11362	tags=39%, list=21%, signal=49%
GO_REGULATION_OF_PROTEIN_LOCALIZATION_TO_CHROMATIN	GO_REGULATION_OF_PROTEIN_LOCALIZATION_TO_CHROMATIN		6	0.62535954	1.269699	0.22560975	0.42525783	1	10008	tags=67%, list=18%, signal=81%
GO_REGULATION_OF_TOLL_LIKE_RECEPTOR_3_SIGNALING_PATHWAY	GO_REGULATION_OF_TOLL_LIKE_RECEPTOR_3_SIGNALING_PATHWAY		9	0.5578069	1.2694818	0.18849206	0.42543846	1	4333	tags=44%, list=8%, signal=48%
GO_NEGATIVE_REGULATION_OF_PEPTIDASE_ACTIVITY	GO_NEGATIVE_REGULATION_OF_PEPTIDASE_ACTIVITY		250	0.31353363	1.269392	0.083694085	0.42537358	1	7281	tags=25%, list=13%, signal=28%
GO_REGULATION_OF_VASCULAR_SMOOTH_MUSCLE_CELL_DIFFERENTIATION	GO_REGULATION_OF_VASCULAR_SMOOTH_MUSCLE_CELL_DIFFERENTIATION		26	0.44975662	1.2693218	0.18539326	0.42526233	1	7082	tags=35%, list=13%, signal=40%
GO_ANATOMICAL_STRUCTURE_REGRESSION	GO_ANATOMICAL_STRUCTURE_REGRESSION		10	0.54934853	1.2692738	0.20689656	0.42511117	1	6104	tags=40%, list=11%, signal=45%
GO_AUTOPHAGY_OF_NUCLEUS	GO_AUTOPHAGY_OF_NUCLEUS		5	0.63022214	1.2692281	0.19709544	0.42497113	1	3476	tags=40%, list=6%, signal=43%
GO_REGULATION_OF_ANION_TRANSPORT	GO_REGULATION_OF_ANION_TRANSPORT		94	0.35400233	1.2685221	0.12776831	0.4260604	1	7380	tags=27%, list=13%, signal=31%
GO_GLOMERULAR_EPITHELIAL_CELL_DIFFERENTIATION	GO_GLOMERULAR_EPITHELIAL_CELL_DIFFERENTIATION		17	0.47857672	1.268438	0.16047297	0.42598546	1	9806	tags=41%, list=18%, signal=50%
GO_REGULATION_OF_ORGANELLE_ASSEMBLY	GO_REGULATION_OF_ORGANELLE_ASSEMBLY		188	0.35835382	1.2677524	0.19699812	0.4270375	1	7536	tags=29%, list=14%, signal=33%
GO_REFLEX	GO_REFLEX		19	0.47201887	1.2675802	0.1904762	0.4271314	1	14036	tags=53%, list=25%, signal=71%
GO_GLYCOSYL_COMPOUND_CATABOLIC_PROCESS	GO_GLYCOSYL_COMPOUND_CATABOLIC_PROCESS		42	0.4025757	1.2675347	0.17307693	0.4269796	1	4326	tags=26%, list=8%, signal=28%
GO_LONG_TERM_SYNAPTIC_DEPRESSION	GO_LONG_TERM_SYNAPTIC_DEPRESSION		30	0.4247787	1.267321	0.17708333	0.42715517	1	11695	tags=43%, list=21%, signal=55%
GO_REGULATION_OF_HYDROGEN_PEROXIDE_METABOLIC_PROCESS	GO_REGULATION_OF_HYDROGEN_PEROXIDE_METABOLIC_PROCESS		8	0.5296119	1.2672274	0.17751479	0.42708156	1	6361	tags=25%, list=12%, signal=28%
GO_ADHERENS_JUNCTION_ORGANIZATION	GO_ADHERENS_JUNCTION_ORGANIZATION		140	0.3801739	1.2665074	0.20637898	0.42822656	1	7315	tags=27%, list=13%, signal=31%
GO_PROTEIN_DEMETHYLATION	GO_PROTEIN_DEMETHYLATION		31	0.45879516	1.2661877	0.22851562	0.42860636	1	8594	tags=42%, list=16%, signal=50%
GO_REGULATION_OF_PROGRAMMED_NECROTIC_CELL_DEATH	GO_REGULATION_OF_PROGRAMMED_NECROTIC_CELL_DEATH		24	0.408195	1.2658896	0.15495495	0.42893937	1	6562	tags=29%, list=12%, signal=33%
GO_ORGANISM_EMERGENCE_FROM_PROTECTIVE_STRUCTURE	GO_ORGANISM_EMERGENCE_FROM_PROTECTIVE_STRUCTURE		27	0.45205155	1.2651669	0.18386492	0.4300962	1	4449	tags=26%, list=8%, signal=28%
GO_NEGATIVE_REGULATION_OF_PROTEIN_SERINE_THREONINE_KINASE_ACTIVITY	GO_NEGATIVE_REGULATION_OF_PROTEIN_SERINE_THREONINE_KINASE_ACTIVITY		134	0.33380967	1.2651348	0.16573557	0.42992008	1	8789	tags=25%, list=16%, signal=29%
GO_REGULATION_OF_BRANCHING_INVOLVED_IN_PROSTATE_GLAND_MORPHOGENESIS	GO_REGULATION_OF_BRANCHING_INVOLVED_IN_PROSTATE_GLAND_MORPHOGENESIS		7	0.61220735	1.264967	0.19855596	0.42998108	1	12612	tags=57%, list=23%, signal=74%
GO_DNA_METHYLATION	GO_DNA_METHYLATION		67	0.41835195	1.2648923	0.19823009	0.42992496	1	12910	tags=42%, list=23%, signal=54%
GO_CELL_FATE_COMMITMENT	GO_CELL_FATE_COMMITMENT		255	0.3544086	1.2648088	0.1573604	0.4298396	1	11357	tags=30%, list=21%, signal=38%
GO_CELLULAR_CHEMICAL_HOMEOSTASIS	GO_CELLULAR_CHEMICAL_HOMEOSTASIS		802	0.31354523	1.2645448	0.12376238	0.43016165	1	9574	tags=26%, list=17%, signal=31%
GO_REGULATION_OF_MAINTENANCE_OF_SISTER_CHROMATID_COHESION	GO_REGULATION_OF_MAINTENANCE_OF_SISTER_CHROMATID_COHESION		8	0.589972	1.264127	0.21401516	0.43071914	1	6689	tags=63%, list=12%, signal=71%
GO_POSITIVE_REGULATION_OF_TRANSMEMBRANE_TRANSPORT	GO_POSITIVE_REGULATION_OF_TRANSMEMBRANE_TRANSPORT		196	0.34552622	1.2634871	0.15106732	0.43170133	1	7585	tags=26%, list=14%, signal=30%
GO_REGULATION_OF_CIRCADIAN_SLEEP_WAKE_CYCLE	GO_REGULATION_OF_CIRCADIAN_SLEEP_WAKE_CYCLE		20	0.518183	1.2633889	0.16693944	0.43167755	1	4298	tags=35%, list=8%, signal=38%
GO_SENSORY_PERCEPTION_OF_TASTE	GO_SENSORY_PERCEPTION_OF_TASTE		66	0.3826182	1.2633582	0.15798046	0.4315049	1	15799	tags=53%, list=29%, signal=74%
GO_REGULATION_OF_ANATOMICAL_STRUCTURE_MORPHOGENESIS	GO_REGULATION_OF_ANATOMICAL_STRUCTURE_MORPHOGENESIS		1116	0.3186391	1.2631506	0.17290552	0.43168348	1	7901	tags=24%, list=14%, signal=27%
GO_NEGATIVE_REGULATION_OF_RESPONSE_TO_INTERFERON_GAMMA	GO_NEGATIVE_REGULATION_OF_RESPONSE_TO_INTERFERON_GAMMA		7	0.562762	1.2631174	0.18538325	0.43150243	1	8425	tags=57%, list=15%, signal=67%
GO_NEGATIVE_REGULATION_OF_PROTEIN_METABOLIC_PROCESS	GO_NEGATIVE_REGULATION_OF_PROTEIN_METABOLIC_PROCESS		1111	0.30151302	1.262559	0.15263158	0.4323005	1	7307	tags=23%, list=13%, signal=26%
GO_NUCLEOBASE_CONTAINING_SMALL_MOLECULE_CATABOLIC_PROCESS	GO_NUCLEOBASE_CONTAINING_SMALL_MOLECULE_CATABOLIC_PROCESS		49	0.38349697	1.2625436	0.19292036	0.43210587	1	5589	tags=24%, list=10%, signal=27%
GO_SMOOTH_MUSCLE_CELL_DIFFERENTIATION	GO_SMOOTH_MUSCLE_CELL_DIFFERENTIATION		69	0.40848163	1.2621856	0.2108209	0.43255833	1	7082	tags=30%, list=13%, signal=35%
GO_GLOMERULAR_EPITHELIAL_CELL_DEVELOPMENT	GO_GLOMERULAR_EPITHELIAL_CELL_DEVELOPMENT		11	0.53199863	1.2614145	0.18197574	0.43379116	1	7514	tags=36%, list=14%, signal=42%
GO_NEGATIVE_REGULATION_OF_VIRAL_RELEASE_FROM_HOST_CELL	GO_NEGATIVE_REGULATION_OF_VIRAL_RELEASE_FROM_HOST_CELL		15	0.4895571	1.2611625	0.19803922	0.43404734	1	9587	tags=47%, list=17%, signal=56%
GO_SPINDLE_LOCALIZATION	GO_SPINDLE_LOCALIZATION		42	0.4319836	1.2610022	0.2	0.4341472	1	11400	tags=36%, list=21%, signal=45%
GO_CRANIAL_NERVE_MORPHOGENESIS	GO_CRANIAL_NERVE_MORPHOGENESIS		28	0.45079932	1.2605876	0.1875	0.43472922	1	9860	tags=36%, list=18%, signal=43%
GO_POSITIVE_REGULATION_OF_CELL_PROLIFERATION_INVOLVED_IN_HEART_MORPHOGENESIS	GO_POSITIVE_REGULATION_OF_CELL_PROLIFERATION_INVOLVED_IN_HEART_MORPHOGENESIS		6	0.59411407	1.260477	0.17625232	0.43471983	1	4895	tags=50%, list=9%, signal=55%
GO_POSITIVE_REGULATION_OF_EPITHELIAL_CELL_MIGRATION	GO_POSITIVE_REGULATION_OF_EPITHELIAL_CELL_MIGRATION		159	0.35619834	1.2596868	0.18853974	0.43598	1	8873	tags=32%, list=16%, signal=38%
GO_ACTIVATION_OF_MAPKKK_ACTIVITY	GO_ACTIVATION_OF_MAPKKK_ACTIVITY		11	0.50581443	1.2596265	0.19585687	0.4358589	1	8345	tags=45%, list=15%, signal=54%
GO_PHENOL_CONTAINING_COMPOUND_BIOSYNTHETIC_PROCESS	GO_PHENOL_CONTAINING_COMPOUND_BIOSYNTHETIC_PROCESS		44	0.40365356	1.2593719	0.14832535	0.43612003	1	8566	tags=36%, list=16%, signal=43%
GO_MITOTIC_SISTER_CHROMATID_COHESION	GO_MITOTIC_SISTER_CHROMATID_COHESION		22	0.51744133	1.2591845	0.2591876	0.43623444	1	10263	tags=59%, list=19%, signal=73%
GO_ANGIOGENESIS_INVOLVED_IN_WOUND_HEALING	GO_ANGIOGENESIS_INVOLVED_IN_WOUND_HEALING		20	0.47711256	1.2590433	0.23431735	0.4362667	1	12613	tags=55%, list=23%, signal=71%
GO_PYROPTOSIS	GO_PYROPTOSIS		11	0.4772399	1.2587261	0.18397085	0.43664205	1	10797	tags=45%, list=20%, signal=56%
GO_ADHERENS_JUNCTION_ASSEMBLY	GO_ADHERENS_JUNCTION_ASSEMBLY		89	0.39930895	1.2584038	0.21011673	0.43704036	1	6866	tags=29%, list=12%, signal=33%
GO_POSITIVE_REGULATION_OF_DNA_RECOMBINATION	GO_POSITIVE_REGULATION_OF_DNA_RECOMBINATION		41	0.43879354	1.2577744	0.2118492	0.43806326	1	14729	tags=49%, list=27%, signal=66%
GO_PHOSPHOLIPID_EFFLUX	GO_PHOSPHOLIPID_EFFLUX		12	0.6021028	1.257581	0.21996616	0.4381784	1	16126	tags=67%, list=29%, signal=94%
GO_N_ACETYLGLUCOSAMINE_METABOLIC_PROCESS	GO_N_ACETYLGLUCOSAMINE_METABOLIC_PROCESS		13	0.49938625	1.2574551	0.18150087	0.43817198	1	7512	tags=38%, list=14%, signal=45%
GO_PHOSPHATIDYLCHOLINE_CATABOLIC_PROCESS	GO_PHOSPHATIDYLCHOLINE_CATABOLIC_PROCESS		8	0.55266535	1.2572033	0.17892644	0.438431	1	2434	tags=38%, list=4%, signal=39%
GO_LABYRINTHINE_LAYER_BLOOD_VESSEL_DEVELOPMENT	GO_LABYRINTHINE_LAYER_BLOOD_VESSEL_DEVELOPMENT		20	0.43178424	1.2570668	0.17457305	0.43845692	1	9187	tags=30%, list=17%, signal=36%
GO_MACROPHAGE_INFLAMMATORY_PROTEIN_1_ALPHA_PRODUCTION	GO_MACROPHAGE_INFLAMMATORY_PROTEIN_1_ALPHA_PRODUCTION		6	0.59121776	1.2566459	0.19512194	0.4390003	1	8214	tags=67%, list=15%, signal=78%
GO_POSITIVE_REGULATION_OF_PROTEIN_COMPLEX_ASSEMBLY	GO_POSITIVE_REGULATION_OF_PROTEIN_COMPLEX_ASSEMBLY		246	0.32052535	1.2566444	0.1508079	0.4387689	1	4980	tags=19%, list=9%, signal=21%
GO_MODULATION_OF_TRANSCRIPTION_IN_OTHER_ORGANISM_INVOLVED_IN_SYMBIOTIC_INTERACTION	GO_MODULATION_OF_TRANSCRIPTION_IN_OTHER_ORGANISM_INVOLVED_IN_SYMBIOTIC_INTERACTION		28	0.4324402	1.2564955	0.21651377	0.43882868	1	6104	tags=32%, list=11%, signal=36%
GO_CELLULAR_COMPONENT_MAINTENANCE	GO_CELLULAR_COMPONENT_MAINTENANCE		55	0.3801625	1.2563641	0.17625232	0.4388409	1	5615	tags=20%, list=10%, signal=22%
GO_POSITIVE_REGULATION_OF_PROTEIN_DEACETYLATION	GO_POSITIVE_REGULATION_OF_PROTEIN_DEACETYLATION		20	0.4468278	1.255985	0.175	0.43927804	1	3910	tags=20%, list=7%, signal=22%
GO_POSITIVE_REGULATION_OF_SMOOTH_MUSCLE_CELL_APOPTOTIC_PROCESS	GO_POSITIVE_REGULATION_OF_SMOOTH_MUSCLE_CELL_APOPTOTIC_PROCESS		17	0.4376756	1.2555879	0.17657992	0.4397959	1	12994	tags=47%, list=24%, signal=62%
GO_PURINE_NUCLEOSIDE_METABOLIC_PROCESS	GO_PURINE_NUCLEOSIDE_METABOLIC_PROCESS		36	0.38490483	1.2554274	0.16030534	0.43985057	1	4106	tags=25%, list=7%, signal=27%
GO_EPITHELIUM_DEVELOPMENT	GO_EPITHELIUM_DEVELOPMENT		1270	0.29680222	1.255418	0.123333335	0.43962678	1	8192	tags=24%, list=15%, signal=27%
GO_TOLL_LIKE_RECEPTOR_2_SIGNALING_PATHWAY	GO_TOLL_LIKE_RECEPTOR_2_SIGNALING_PATHWAY		15	0.4871891	1.2549776	0.22693726	0.4402509	1	15091	tags=53%, list=27%, signal=73%
GO_POSITIVE_REGULATION_OF_FIBROBLAST_GROWTH_FACTOR_PRODUCTION	GO_POSITIVE_REGULATION_OF_FIBROBLAST_GROWTH_FACTOR_PRODUCTION		5	0.6488008	1.2548304	0.23518164	0.44029242	1	15234	tags=80%, list=28%, signal=110%
GO_MYELIN_MAINTENANCE	GO_MYELIN_MAINTENANCE		14	0.45914376	1.2546117	0.17680608	0.4404535	1	7045	tags=36%, list=13%, signal=41%
GO_REGULATION_OF_SODIUM_ION_TRANSMEMBRANE_TRANSPORTER_ACTIVITY	GO_REGULATION_OF_SODIUM_ION_TRANSMEMBRANE_TRANSPORTER_ACTIVITY		52	0.38504845	1.2546003	0.19748653	0.4402342	1	10132	tags=35%, list=18%, signal=42%
GO_EXTRINSIC_APOPTOTIC_SIGNALING_PATHWAY_VIA_DEATH_DOMAIN_RECEPTORS	GO_EXTRINSIC_APOPTOTIC_SIGNALING_PATHWAY_VIA_DEATH_DOMAIN_RECEPTORS		84	0.36239704	1.2540452	0.15441176	0.44110534	1	8808	tags=30%, list=16%, signal=35%
GO_LIPID_LOCALIZATION	GO_LIPID_LOCALIZATION		403	0.30806872	1.254024	0.122689076	0.44091645	1	9395	tags=27%, list=17%, signal=32%
GO_MONOTERPENOID_METABOLIC_PROCESS	GO_MONOTERPENOID_METABOLIC_PROCESS		6	0.6298725	1.2537822	0.21621622	0.4411502	1	20429	tags=100%, list=37%, signal=159%
GO_NEUROMUSCULAR_PROCESS	GO_NEUROMUSCULAR_PROCESS		106	0.36891615	1.2535379	0.16896552	0.4413829	1	8625	tags=29%, list=16%, signal=35%
GO_AUTOPHAGY_OF_PEROXISOME	GO_AUTOPHAGY_OF_PEROXISOME		5	0.7222905	1.2528187	0.21666667	0.4425863	1	1552	tags=40%, list=3%, signal=41%
GO_REGULATION_OF_INTERLEUKIN_18_PRODUCTION	GO_REGULATION_OF_INTERLEUKIN_18_PRODUCTION		8	0.56650186	1.2524662	0.21284404	0.4430268	1	13870	tags=75%, list=25%, signal=100%
GO_POSITIVE_REGULATION_OF_CALCIUM_ION_TRANSPORT_INTO_CYTOSOL	GO_POSITIVE_REGULATION_OF_CALCIUM_ION_TRANSPORT_INTO_CYTOSOL		54	0.39420065	1.2521962	0.18032786	0.44331035	1	2938	tags=22%, list=5%, signal=23%
GO_INTERMEMBRANE_LIPID_TRANSFER	GO_INTERMEMBRANE_LIPID_TRANSFER		11	0.49197844	1.2521437	0.19633028	0.4431705	1	10020	tags=45%, list=18%, signal=56%
GO_NEGATIVE_REGULATION_OF_PROTEIN_AUTOPHOSPHORYLATION	GO_NEGATIVE_REGULATION_OF_PROTEIN_AUTOPHOSPHORYLATION		13	0.5090168	1.2512482	0.22779922	0.44463444	1	5446	tags=31%, list=10%, signal=34%
GO_GLOMERULUS_DEVELOPMENT	GO_GLOMERULUS_DEVELOPMENT		61	0.42652935	1.25115	0.2129964	0.44457558	1	10112	tags=34%, list=18%, signal=42%
GO_NEGATIVE_REGULATION_OF_NON_CANONICAL_WNT_SIGNALING_PATHWAY	GO_NEGATIVE_REGULATION_OF_NON_CANONICAL_WNT_SIGNALING_PATHWAY		6	0.61250615	1.2510408	0.19889502	0.4445502	1	9201	tags=50%, list=17%, signal=60%
GO_LIPID_MODIFICATION	GO_LIPID_MODIFICATION		235	0.34325144	1.2505531	0.17798164	0.44526497	1	7455	tags=24%, list=14%, signal=28%
GO_ISOTYPE_SWITCHING_TO_IGA_ISOTYPES	GO_ISOTYPE_SWITCHING_TO_IGA_ISOTYPES		6	0.65761226	1.2503625	0.2108209	0.44540706	1	14260	tags=83%, list=26%, signal=112%
GO_NEGATIVE_REGULATION_OF_DENDRITIC_CELL_APOPTOTIC_PROCESS	GO_NEGATIVE_REGULATION_OF_DENDRITIC_CELL_APOPTOTIC_PROCESS		7	0.6670762	1.2501707	0.2340824	0.44553685	1	8158	tags=71%, list=15%, signal=84%
GO_POSITIVE_REGULATION_OF_PROTEIN_DEPHOSPHORYLATION	GO_POSITIVE_REGULATION_OF_PROTEIN_DEPHOSPHORYLATION		41	0.38672832	1.2496282	0.1852552	0.4463468	1	7029	tags=24%, list=13%, signal=28%
GO_CELLULAR_RESPONSE_TO_NUTRIENT	GO_CELLULAR_RESPONSE_TO_NUTRIENT		70	0.35484356	1.2490795	0.17331022	0.44720665	1	5813	tags=23%, list=11%, signal=26%
GO_ADRENERGIC_RECEPTOR_SIGNALING_PATHWAY	GO_ADRENERGIC_RECEPTOR_SIGNALING_PATHWAY		31	0.406411	1.2490237	0.19031142	0.44706824	1	12954	tags=42%, list=23%, signal=55%
GO_BONE_MARROW_DEVELOPMENT	GO_BONE_MARROW_DEVELOPMENT		8	0.53734833	1.2490101	0.19649805	0.4468567	1	2050	tags=25%, list=4%, signal=26%
GO_APOLIPOPROTEIN_A_I_MEDIATED_SIGNALING_PATHWAY	GO_APOLIPOPROTEIN_A_I_MEDIATED_SIGNALING_PATHWAY		6	0.6178226	1.2489672	0.21616541	0.4467027	1	12100	tags=50%, list=22%, signal=64%
GO_REGULATION_OF_CELL_PROJECTION_ASSEMBLY	GO_REGULATION_OF_CELL_PROJECTION_ASSEMBLY		173	0.32923436	1.248756	0.17407407	0.44688416	1	7715	tags=25%, list=14%, signal=29%
GO_INTERSPECIES_INTERACTION_BETWEEN_ORGANISMS	GO_INTERSPECIES_INTERACTION_BETWEEN_ORGANISMS		924	0.30721024	1.2487037	0.17359856	0.44674316	1	7352	tags=24%, list=13%, signal=27%
GO_REGULATION_OF_LYASE_ACTIVITY	GO_REGULATION_OF_LYASE_ACTIVITY		45	0.38527414	1.2486354	0.15912898	0.44663492	1	5207	tags=20%, list=9%, signal=22%
GO_NEGATIVE_REGULATION_OF_JUN_KINASE_ACTIVITY	GO_NEGATIVE_REGULATION_OF_JUN_KINASE_ACTIVITY		13	0.4738294	1.248506	0.18774703	0.4466542	1	9290	tags=38%, list=17%, signal=46%
GO_SELECTIVE_AUTOPHAGY	GO_SELECTIVE_AUTOPHAGY		47	0.40316853	1.2484246	0.21756487	0.4465863	1	8740	tags=34%, list=16%, signal=40%
GO_NEGATIVE_REGULATION_OF_EXTRACELLULAR_MATRIX_ORGANIZATION	GO_NEGATIVE_REGULATION_OF_EXTRACELLULAR_MATRIX_ORGANIZATION		11	0.5025609	1.24836	0.21875	0.44647393	1	18850	tags=64%, list=34%, signal=97%
GO_NOTCH_SIGNALING_INVOLVED_IN_HEART_DEVELOPMENT	GO_NOTCH_SIGNALING_INVOLVED_IN_HEART_DEVELOPMENT		9	0.5687751	1.2480367	0.23163842	0.4468554	1	18569	tags=67%, list=34%, signal=100%
GO_ENDODERMAL_CELL_FATE_COMMITMENT	GO_ENDODERMAL_CELL_FATE_COMMITMENT		15	0.46617672	1.247949	0.17468806	0.44678277	1	6890	tags=33%, list=12%, signal=38%
GO_HISTONE_MRNA_CATABOLIC_PROCESS	GO_HISTONE_MRNA_CATABOLIC_PROCESS		12	0.5112506	1.247891	0.23828125	0.44666675	1	4383	tags=33%, list=8%, signal=36%
GO_PLASMA_MEMBRANE_ORGANIZATION	GO_PLASMA_MEMBRANE_ORGANIZATION		92	0.34704	1.2478428	0.173258	0.44652036	1	4406	tags=20%, list=8%, signal=21%
GO_REGULATION_OF_PROTEIN_POLYMERIZATION	GO_REGULATION_OF_PROTEIN_POLYMERIZATION		210	0.32299268	1.2478079	0.16058394	0.4463555	1	7959	tags=23%, list=14%, signal=27%
GO_THORAX_AND_ANTERIOR_ABDOMEN_DETERMINATION	GO_THORAX_AND_ANTERIOR_ABDOMEN_DETERMINATION		5	0.63748497	1.2476778	0.19739293	0.44636962	1	3805	tags=40%, list=7%, signal=43%
GO_VASCULAR_ENDOTHELIAL_GROWTH_FACTOR_RECEPTOR_SIGNALING_PATHWAY	GO_VASCULAR_ENDOTHELIAL_GROWTH_FACTOR_RECEPTOR_SIGNALING_PATHWAY		93	0.3736654	1.2474822	0.20729366	0.4465126	1	4283	tags=17%, list=8%, signal=19%
GO_PARATHYROID_GLAND_DEVELOPMENT	GO_PARATHYROID_GLAND_DEVELOPMENT		7	0.5791742	1.247398	0.21180555	0.44644073	1	8990	tags=43%, list=16%, signal=51%
GO_NEGATIVE_REGULATION_OF_LONG_TERM_SYNAPTIC_POTENTIATION	GO_NEGATIVE_REGULATION_OF_LONG_TERM_SYNAPTIC_POTENTIATION		12	0.50670505	1.2473246	0.22222222	0.44635996	1	7715	tags=42%, list=14%, signal=48%
GO_POSITIVE_REGULATION_OF_EPITHELIAL_CELL_PROLIFERATION_INVOLVED_IN_LUNG_MORPHOGENESIS	GO_POSITIVE_REGULATION_OF_EPITHELIAL_CELL_PROLIFERATION_INVOLVED_IN_LUNG_MORPHOGENESIS		5	0.62778157	1.2472672	0.21201414	0.44622025	1	14237	tags=80%, list=26%, signal=108%
GO_EPITHELIAL_CELL_APOPTOTIC_PROCESS	GO_EPITHELIAL_CELL_APOPTOTIC_PROCESS		107	0.3482347	1.2472085	0.18505338	0.44609374	1	8705	tags=26%, list=16%, signal=31%
GO_CHEMICAL_HOMEOSTASIS	GO_CHEMICAL_HOMEOSTASIS		1174	0.30394465	1.2470245	0.12605043	0.44620448	1	9001	tags=25%, list=16%, signal=29%
GO_EPOXYGENASE_P450_PATHWAY	GO_EPOXYGENASE_P450_PATHWAY		20	0.51490194	1.2469583	0.22970639	0.44609138	1	4040	tags=25%, list=7%, signal=27%
GO_POSITIVE_REGULATION_OF_EPITHELIAL_CELL_APOPTOTIC_PROCESS	GO_POSITIVE_REGULATION_OF_EPITHELIAL_CELL_APOPTOTIC_PROCESS		35	0.40610075	1.2467362	0.19666049	0.4462773	1	7554	tags=23%, list=14%, signal=26%
GO_GENITALIA_DEVELOPMENT	GO_GENITALIA_DEVELOPMENT		46	0.39828125	1.246645	0.18655463	0.4462262	1	11776	tags=39%, list=21%, signal=50%
GO_POSITIVE_REGULATION_OF_ION_TRANSPORT	GO_POSITIVE_REGULATION_OF_ION_TRANSPORT		265	0.32464907	1.2464372	0.15814696	0.44640234	1	8457	tags=26%, list=15%, signal=31%
GO_NEGATIVE_REGULATION_OF_SERINE_TYPE_PEPTIDASE_ACTIVITY	GO_NEGATIVE_REGULATION_OF_SERINE_TYPE_PEPTIDASE_ACTIVITY		7	0.5890507	1.2461565	0.21401516	0.44673118	1	1693	tags=43%, list=3%, signal=44%
GO_RIGHTING_REFLEX	GO_RIGHTING_REFLEX		8	0.5701475	1.2459873	0.2413793	0.44682926	1	12922	tags=50%, list=23%, signal=65%
GO_RESPONSE_TO_ALUMINUM_ION	GO_RESPONSE_TO_ALUMINUM_ION		5	0.6238883	1.2459546	0.20774648	0.44665435	1	1074	tags=20%, list=2%, signal=20%
GO_NEGATIVE_REGULATION_OF_CELL_DEATH	GO_NEGATIVE_REGULATION_OF_CELL_DEATH		996	0.29887062	1.2456863	0.13621262	0.44693935	1	7192	tags=22%, list=13%, signal=25%
GO_CELLULAR_RESPONSE_TO_ORGANIC_CYCLIC_COMPOUND	GO_CELLULAR_RESPONSE_TO_ORGANIC_CYCLIC_COMPOUND		539	0.32251185	1.245396	0.16784452	0.4472623	1	11283	tags=31%, list=20%, signal=39%
GO_NUCLEOBASE_CATABOLIC_PROCESS	GO_NUCLEOBASE_CATABOLIC_PROCESS		6	0.5886991	1.2450575	0.22307692	0.4476592	1	20992	tags=83%, list=38%, signal=134%
GO_INTERACTION_WITH_HOST	GO_INTERACTION_WITH_HOST		208	0.31893697	1.244062	0.15036231	0.44931504	1	7557	tags=25%, list=14%, signal=29%
GO_REGULATION_OF_PHOTORECEPTOR_CELL_DIFFERENTIATION	GO_REGULATION_OF_PHOTORECEPTOR_CELL_DIFFERENTIATION		10	0.5465491	1.24406	0.20103092	0.44908127	1	12249	tags=50%, list=22%, signal=64%
GO_APOPTOTIC_PROCESS	GO_APOPTOTIC_PROCESS		1948	0.2959305	1.2439569	0.1388889	0.44904947	1	8873	tags=24%, list=16%, signal=28%
GO_REGULATION_OF_MITOPHAGY	GO_REGULATION_OF_MITOPHAGY		16	0.4607934	1.2436392	0.2254902	0.44946554	1	8740	tags=38%, list=16%, signal=45%
GO_POSITIVE_REGULATION_OF_GLUCOSE_TRANSMEMBRANE_TRANSPORT	GO_POSITIVE_REGULATION_OF_GLUCOSE_TRANSMEMBRANE_TRANSPORT		43	0.42365196	1.2435316	0.21578947	0.44944707	1	5615	tags=26%, list=10%, signal=28%
GO_PERIPHERAL_NERVOUS_SYSTEM_NEURON_DIFFERENTIATION	GO_PERIPHERAL_NERVOUS_SYSTEM_NEURON_DIFFERENTIATION		12	0.5380576	1.2432055	0.21853147	0.4498436	1	5147	tags=33%, list=9%, signal=37%
GO_REGULATION_OF_SYNAPTIC_TRANSMISSION_GABAERGIC	GO_REGULATION_OF_SYNAPTIC_TRANSMISSION_GABAERGIC		32	0.44601363	1.2428432	0.2268761	0.45031205	1	4434	tags=25%, list=8%, signal=27%
GO_HEART_GROWTH	GO_HEART_GROWTH		104	0.36548236	1.2428116	0.17504655	0.4501424	1	12827	tags=37%, list=23%, signal=48%
GO_MACROPHAGE_DIFFERENTIATION	GO_MACROPHAGE_DIFFERENTIATION		39	0.4162094	1.2426581	0.2122905	0.45019665	1	2308	tags=23%, list=4%, signal=24%
GO_POSITIVE_REGULATION_OF_BONE_RESORPTION	GO_POSITIVE_REGULATION_OF_BONE_RESORPTION		17	0.45047414	1.2426251	0.21568628	0.45002228	1	2286	tags=24%, list=4%, signal=25%
GO_REGULATION_OF_STEM_CELL_DIVISION	GO_REGULATION_OF_STEM_CELL_DIVISION		10	0.5228142	1.2422861	0.20555556	0.450437	1	2777	tags=20%, list=5%, signal=21%
GO_MESENCHYMAL_EPITHELIAL_CELL_SIGNALING	GO_MESENCHYMAL_EPITHELIAL_CELL_SIGNALING		8	0.606512	1.2422621	0.22654867	0.45024064	1	11041	tags=50%, list=20%, signal=62%
GO_HOMOTYPIC_CELL_CELL_ADHESION	GO_HOMOTYPIC_CELL_CELL_ADHESION		77	0.3609726	1.2409781	0.17697595	0.45247525	1	5012	tags=23%, list=9%, signal=26%
GO_DNA_DEMETHYLATION	GO_DNA_DEMETHYLATION		26	0.42609534	1.2409439	0.19202898	0.45230407	1	9609	tags=42%, list=17%, signal=51%
GO_LOCOMOTOR_RHYTHM	GO_LOCOMOTOR_RHYTHM		13	0.4701119	1.2408937	0.20192307	0.45216864	1	7432	tags=31%, list=13%, signal=36%
GO_REGULATION_OF_PROTEIN_TYROSINE_KINASE_ACTIVITY	GO_REGULATION_OF_PROTEIN_TYROSINE_KINASE_ACTIVITY		88	0.34218523	1.2407676	0.17518248	0.45218852	1	6289	tags=22%, list=11%, signal=24%
GO_ENDOSOME_TO_LYSOSOME_TRANSPORT	GO_ENDOSOME_TO_LYSOSOME_TRANSPORT		57	0.3780873	1.2406875	0.18613862	0.45211238	1	6835	tags=26%, list=12%, signal=30%
GO_CHROMATIN_SILENCING_AT_TELOMERE	GO_CHROMATIN_SILENCING_AT_TELOMERE		8	0.58483756	1.2403781	0.2601476	0.45246682	1	12910	tags=63%, list=23%, signal=82%
GO_REGULATION_OF_PEPTIDASE_ACTIVITY	GO_REGULATION_OF_PEPTIDASE_ACTIVITY		428	0.29021654	1.2403725	0.119760476	0.45224604	1	7281	tags=23%, list=13%, signal=27%
GO_NEGATIVE_REGULATION_OF_OSTEOBLAST_PROLIFERATION	GO_NEGATIVE_REGULATION_OF_OSTEOBLAST_PROLIFERATION		12	0.48221615	1.2398942	0.1988743	0.45296523	1	7161	tags=42%, list=13%, signal=48%
GO_MAST_CELL_CYTOKINE_PRODUCTION	GO_MAST_CELL_CYTOKINE_PRODUCTION		7	0.5765972	1.2397617	0.21708184	0.45297793	1	4571	tags=43%, list=8%, signal=47%
GO_CAMP_BIOSYNTHETIC_PROCESS	GO_CAMP_BIOSYNTHETIC_PROCESS		10	0.56077313	1.2395655	0.21302816	0.4531171	1	16620	tags=70%, list=30%, signal=100%
GO_GOLGI_TO_LYSOSOME_TRANSPORT	GO_GOLGI_TO_LYSOSOME_TRANSPORT		8	0.5607383	1.2392776	0.21900827	0.45341906	1	2653	tags=38%, list=5%, signal=39%
GO_CHEMOKINE_BIOSYNTHETIC_PROCESS	GO_CHEMOKINE_BIOSYNTHETIC_PROCESS		14	0.46629876	1.2388037	0.20207255	0.45409593	1	10151	tags=43%, list=18%, signal=53%
GO_REGULATION_OF_CYSTEINE_TYPE_ENDOPEPTIDASE_ACTIVITY	GO_REGULATION_OF_CYSTEINE_TYPE_ENDOPEPTIDASE_ACTIVITY		228	0.3130774	1.2386967	0.1542461	0.45407617	1	7008	tags=25%, list=13%, signal=29%
GO_TANGENTIAL_MIGRATION_FROM_THE_SUBVENTRICULAR_ZONE_TO_THE_OLFACTORY_BULB	GO_TANGENTIAL_MIGRATION_FROM_THE_SUBVENTRICULAR_ZONE_TO_THE_OLFACTORY_BULB		6	0.6046039	1.2386311	0.243346	0.45396036	1	5475	tags=50%, list=10%, signal=56%
GO_PRODUCTION_OF_SMALL_RNA_INVOLVED_IN_GENE_SILENCING_BY_RNA	GO_PRODUCTION_OF_SMALL_RNA_INVOLVED_IN_GENE_SILENCING_BY_RNA		51	0.44331434	1.2383752	0.25519848	0.4542173	1	10501	tags=39%, list=19%, signal=48%
GO_CANONICAL_WNT_SIGNALING_PATHWAY_INVOLVED_IN_REGULATION_OF_CELL_PROLIFERATION	GO_CANONICAL_WNT_SIGNALING_PATHWAY_INVOLVED_IN_REGULATION_OF_CELL_PROLIFERATION		6	0.6186882	1.2383528	0.22161172	0.4540293	1	3788	tags=33%, list=7%, signal=36%
GO_POSITIVE_REGULATION_OF_EPITHELIAL_CELL_PROLIFERATION	GO_POSITIVE_REGULATION_OF_EPITHELIAL_CELL_PROLIFERATION		197	0.33634037	1.2382863	0.19080068	0.4539292	1	6358	tags=23%, list=12%, signal=26%
GO_NEGATIVE_REGULATION_OF_ACUTE_INFLAMMATORY_RESPONSE_TO_ANTIGENIC_STIMULUS	GO_NEGATIVE_REGULATION_OF_ACUTE_INFLAMMATORY_RESPONSE_TO_ANTIGENIC_STIMULUS		5	0.6189846	1.2380843	0.21102661	0.45412338	1	4434	tags=60%, list=8%, signal=65%
GO_REGULATION_OF_ENDOTHELIAL_CELL_MIGRATION	GO_REGULATION_OF_ENDOTHELIAL_CELL_MIGRATION		202	0.32147604	1.2380315	0.17710197	0.4539849	1	12045	tags=33%, list=22%, signal=42%
GO_TYPE_II_PNEUMOCYTE_DIFFERENTIATION	GO_TYPE_II_PNEUMOCYTE_DIFFERENTIATION		5	0.6438923	1.2379858	0.2311828	0.45384684	1	6840	tags=60%, list=12%, signal=68%
GO_NEGATIVE_REGULATION_OF_PRI_MIRNA_TRANSCRIPTION_BY_RNA_POLYMERASE_II	GO_NEGATIVE_REGULATION_OF_PRI_MIRNA_TRANSCRIPTION_BY_RNA_POLYMERASE_II		12	0.5195957	1.2369977	0.22727273	0.4555766	1	3669	tags=33%, list=7%, signal=36%
GO_ACID_SECRETION	GO_ACID_SECRETION		123	0.34459266	1.2368307	0.15629984	0.4556442	1	7266	tags=25%, list=13%, signal=29%
GO_POSITIVE_REGULATION_OF_NUCLEAR_CELL_CYCLE_DNA_REPLICATION	GO_POSITIVE_REGULATION_OF_NUCLEAR_CELL_CYCLE_DNA_REPLICATION		6	0.6403064	1.2367405	0.26177025	0.45559114	1	11041	tags=50%, list=20%, signal=62%
GO_AUTOPHAGOSOME_ORGANIZATION	GO_AUTOPHAGOSOME_ORGANIZATION		95	0.3602221	1.2367237	0.22460938	0.4553937	1	7748	tags=26%, list=14%, signal=31%
GO_NEUROTROPHIN_SIGNALING_PATHWAY	GO_NEUROTROPHIN_SIGNALING_PATHWAY		39	0.4104277	1.236458	0.21428572	0.45566264	1	8486	tags=26%, list=15%, signal=30%
GO_REGULATION_OF_WOUND_HEALING	GO_REGULATION_OF_WOUND_HEALING		135	0.3496262	1.2362794	0.18307427	0.45579824	1	5882	tags=24%, list=11%, signal=26%
GO_NECROTIC_CELL_DEATH	GO_NECROTIC_CELL_DEATH		57	0.3454686	1.2362148	0.1696113	0.45571297	1	6562	tags=28%, list=12%, signal=32%
GO_REGULATION_OF_ADHERENS_JUNCTION_ORGANIZATION	GO_REGULATION_OF_ADHERENS_JUNCTION_ORGANIZATION		67	0.40834734	1.2361729	0.25048923	0.45555046	1	6866	tags=33%, list=12%, signal=37%
GO_NEGATIVE_REGULATION_OF_SPROUTING_ANGIOGENESIS	GO_NEGATIVE_REGULATION_OF_SPROUTING_ANGIOGENESIS		61	0.30707157	1.2355574	0.17073171	0.45647794	1	7370	tags=20%, list=13%, signal=23%
GO_REGULATION_OF_CELLULAR_RESPONSE_TO_MACROPHAGE_COLONY_STIMULATING_FACTOR_STIMULUS	GO_REGULATION_OF_CELLULAR_RESPONSE_TO_MACROPHAGE_COLONY_STIMULATING_FACTOR_STIMULUS		5	0.6530937	1.2353438	0.23765996	0.45665425	1	4255	tags=60%, list=8%, signal=65%
GO_DEVELOPMENTAL_MATURATION	GO_DEVELOPMENTAL_MATURATION		278	0.32637468	1.2352369	0.17156863	0.45661426	1	7662	tags=23%, list=14%, signal=27%
GO_AMEBOIDAL_TYPE_CELL_MIGRATION	GO_AMEBOIDAL_TYPE_CELL_MIGRATION		436	0.32498118	1.2350329	0.2032967	0.4567714	1	8873	tags=26%, list=16%, signal=31%
GO_TISSUE_MIGRATION	GO_TISSUE_MIGRATION		333	0.32332993	1.2348326	0.20366973	0.45692325	1	8873	tags=27%, list=16%, signal=32%
GO_FOREBRAIN_MORPHOGENESIS	GO_FOREBRAIN_MORPHOGENESIS		12	0.49930462	1.2347784	0.21176471	0.4568052	1	10916	tags=33%, list=20%, signal=42%
GO_REGULATION_OF_CELL_MIGRATION_INVOLVED_IN_SPROUTING_ANGIOGENESIS	GO_REGULATION_OF_CELL_MIGRATION_INVOLVED_IN_SPROUTING_ANGIOGENESIS		73	0.3453401	1.2341074	0.19512194	0.45788717	1	11695	tags=33%, list=21%, signal=42%
GO_NEGATIVE_REGULATION_OF_ACUTE_INFLAMMATORY_RESPONSE	GO_NEGATIVE_REGULATION_OF_ACUTE_INFLAMMATORY_RESPONSE		12	0.48086837	1.2340084	0.20216607	0.45785734	1	4434	tags=33%, list=8%, signal=36%
GO_DYNAMIN_FAMILY_PROTEIN_POLYMERIZATION_INVOLVED_IN_MEMBRANE_FISSION	GO_DYNAMIN_FAMILY_PROTEIN_POLYMERIZATION_INVOLVED_IN_MEMBRANE_FISSION		5	0.64193016	1.2339925	0.24225865	0.45766082	1	1472	tags=40%, list=3%, signal=41%
GO_LACRIMAL_GLAND_DEVELOPMENT	GO_LACRIMAL_GLAND_DEVELOPMENT		7	0.6103527	1.2339026	0.23709369	0.45759192	1	12612	tags=43%, list=23%, signal=56%
GO_NEGATIVE_REGULATION_OF_SYNAPSE_ORGANIZATION	GO_NEGATIVE_REGULATION_OF_SYNAPSE_ORGANIZATION		24	0.43468827	1.2338585	0.19787987	0.4574613	1	3948	tags=25%, list=7%, signal=27%
GO_CELLULAR_RESPONSE_TO_HYPEROXIA	GO_CELLULAR_RESPONSE_TO_HYPEROXIA		7	0.53663254	1.2335817	0.18834952	0.45775896	1	5613	tags=43%, list=10%, signal=48%
GO_HEXOSE_CATABOLIC_PROCESS	GO_HEXOSE_CATABOLIC_PROCESS		33	0.37431315	1.2335427	0.1793961	0.45759907	1	7848	tags=24%, list=14%, signal=28%
GO_CARDIAC_MUSCLE_CELL_PROLIFERATION	GO_CARDIAC_MUSCLE_CELL_PROLIFERATION		64	0.38330597	1.2334285	0.20037106	0.4575848	1	11340	tags=33%, list=21%, signal=41%
GO_HISTAMINE_TRANSPORT	GO_HISTAMINE_TRANSPORT		12	0.48857155	1.2332006	0.21468927	0.45778048	1	4530	tags=25%, list=8%, signal=27%
GO_DE_NOVO_NAD_BIOSYNTHETIC_PROCESS_FROM_TRYPTOPHAN	GO_DE_NOVO_NAD_BIOSYNTHETIC_PROCESS_FROM_TRYPTOPHAN		7	0.58705086	1.2330782	0.21178637	0.45778102	1	6103	tags=43%, list=11%, signal=48%
GO_BILE_ACID_AND_BILE_SALT_TRANSPORT	GO_BILE_ACID_AND_BILE_SALT_TRANSPORT		25	0.41826302	1.2328209	0.20774648	0.45803544	1	9131	tags=36%, list=17%, signal=43%
GO_AROMATIC_AMINO_ACID_FAMILY_METABOLIC_PROCESS	GO_AROMATIC_AMINO_ACID_FAMILY_METABOLIC_PROCESS		13	0.4882041	1.2325659	0.23741007	0.45829555	1	6103	tags=31%, list=11%, signal=35%
GO_REGULATION_OF_NEURON_MIGRATION	GO_REGULATION_OF_NEURON_MIGRATION		40	0.41819507	1.2325021	0.21755028	0.45819515	1	8807	tags=35%, list=16%, signal=42%
GO_POSITIVE_REGULATION_OF_MESODERM_DEVELOPMENT	GO_POSITIVE_REGULATION_OF_MESODERM_DEVELOPMENT		8	0.55381954	1.2324778	0.22867514	0.4580145	1	11207	tags=50%, list=20%, signal=63%
GO_DEMETHYLATION	GO_DEMETHYLATION		68	0.37477255	1.2324625	0.21607143	0.4578169	1	9715	tags=37%, list=18%, signal=45%
GO_GLYCEROLIPID_METABOLIC_PROCESS	GO_GLYCEROLIPID_METABOLIC_PROCESS		225	0.3310323	1.231681	0.16201118	0.45907667	1	6043	tags=21%, list=11%, signal=24%
GO_POSITIVE_REGULATION_OF_ALCOHOL_BIOSYNTHETIC_PROCESS	GO_POSITIVE_REGULATION_OF_ALCOHOL_BIOSYNTHETIC_PROCESS		28	0.3966505	1.2316345	0.19320215	0.45893028	1	1407	tags=11%, list=3%, signal=11%
GO_POSITIVE_REGULATION_OF_LIPOPOLYSACCHARIDE_MEDIATED_SIGNALING_PATHWAY	GO_POSITIVE_REGULATION_OF_LIPOPOLYSACCHARIDE_MEDIATED_SIGNALING_PATHWAY		8	0.56033605	1.2314168	0.24705882	0.45911285	1	2366	tags=38%, list=4%, signal=39%
GO_NEUROMUSCULAR_PROCESS_CONTROLLING_BALANCE	GO_NEUROMUSCULAR_PROCESS_CONTROLLING_BALANCE		50	0.39429557	1.2307074	0.206655	0.46025744	1	4894	tags=24%, list=9%, signal=26%
GO_POSITIVE_REGULATION_OF_FATTY_ACID_BIOSYNTHETIC_PROCESS	GO_POSITIVE_REGULATION_OF_FATTY_ACID_BIOSYNTHETIC_PROCESS		20	0.44505978	1.2303063	0.19965577	0.46077016	1	4636	tags=20%, list=8%, signal=22%
GO_POSITIVE_REGULATION_OF_ION_TRANSMEMBRANE_TRANSPORT	GO_POSITIVE_REGULATION_OF_ION_TRANSMEMBRANE_TRANSPORT		149	0.33735564	1.2301787	0.17142858	0.46077606	1	7585	tags=26%, list=14%, signal=30%
GO_LYSOSOMAL_TRANSPORT	GO_LYSOSOMAL_TRANSPORT		104	0.3697244	1.2300793	0.24425887	0.46072888	1	10233	tags=32%, list=19%, signal=39%
GO_ADENOSINE_TO_INOSINE_EDITING	GO_ADENOSINE_TO_INOSINE_EDITING		9	0.52875537	1.2300742	0.21350364	0.46050593	1	2428	tags=22%, list=4%, signal=23%
GO_ANTIGEN_PROCESSING_AND_PRESENTATION_OF_PEPTIDE_ANTIGEN	GO_ANTIGEN_PROCESSING_AND_PRESENTATION_OF_PEPTIDE_ANTIGEN		185	0.34936884	1.2293699	0.22490707	0.46160343	1	3452	tags=19%, list=6%, signal=20%
GO_TRANSPOSITION_RNA_MEDIATED	GO_TRANSPOSITION_RNA_MEDIATED		5	0.6742617	1.2292523	0.24007562	0.46161264	1	6241	tags=40%, list=11%, signal=45%
GO_VOCALIZATION_BEHAVIOR	GO_VOCALIZATION_BEHAVIOR		18	0.47282848	1.2291018	0.23834197	0.4616818	1	4003	tags=22%, list=7%, signal=24%
GO_REGULATION_OF_LIPID_METABOLIC_PROCESS	GO_REGULATION_OF_LIPID_METABOLIC_PROCESS		382	0.3104379	1.2289681	0.18998273	0.46173346	1	12202	tags=33%, list=22%, signal=42%
GO_POSITIVE_REGULATION_OF_MACROPHAGE_CYTOKINE_PRODUCTION	GO_POSITIVE_REGULATION_OF_MACROPHAGE_CYTOKINE_PRODUCTION		9	0.5576237	1.2289039	0.24772313	0.46163023	1	4255	tags=33%, list=8%, signal=36%
GO_CELLULAR_RESPONSE_TO_OXIDATIVE_STRESS	GO_CELLULAR_RESPONSE_TO_OXIDATIVE_STRESS		287	0.31140366	1.2288533	0.15602838	0.46150744	1	6544	tags=23%, list=12%, signal=26%
GO_RESPONSE_TO_INTERLEUKIN_7	GO_RESPONSE_TO_INTERLEUKIN_7		40	0.39409497	1.2286447	0.2112676	0.46167064	1	3442	tags=23%, list=6%, signal=24%
GO_HISTAMINE_PRODUCTION_INVOLVED_IN_INFLAMMATORY_RESPONSE	GO_HISTAMINE_PRODUCTION_INVOLVED_IN_INFLAMMATORY_RESPONSE		7	0.5575721	1.2284533	0.22504893	0.4618247	1	237	tags=14%, list=0%, signal=14%
GO_RESPONSE_TO_NUTRIENT	GO_RESPONSE_TO_NUTRIENT		217	0.3101462	1.2283355	0.15823817	0.46180737	1	5882	tags=20%, list=11%, signal=22%
GO_OTIC_VESICLE_MORPHOGENESIS	GO_OTIC_VESICLE_MORPHOGENESIS		9	0.550687	1.2278112	0.21640489	0.46254018	1	12612	tags=56%, list=23%, signal=72%
GO_SREBP_SIGNALING_PATHWAY	GO_SREBP_SIGNALING_PATHWAY		9	0.5423005	1.2275926	0.234714	0.46274012	1	2132	tags=33%, list=4%, signal=35%
GO_RENAL_SYSTEM_PROCESS_INVOLVED_IN_REGULATION_OF_SYSTEMIC_ARTERIAL_BLOOD_PRESSURE	GO_RENAL_SYSTEM_PROCESS_INVOLVED_IN_REGULATION_OF_SYSTEMIC_ARTERIAL_BLOOD_PRESSURE		23	0.44799054	1.2275195	0.24682395	0.46265718	1	3611	tags=17%, list=7%, signal=19%
GO_NEGATIVE_REGULATION_OF_PROTEOLYSIS	GO_NEGATIVE_REGULATION_OF_PROTEOLYSIS		342	0.2903965	1.227338	0.114074074	0.4627684	1	7071	tags=24%, list=13%, signal=27%
GO_NEGATIVE_REGULATION_OF_SMOOTH_MUSCLE_CELL_DIFFERENTIATION	GO_NEGATIVE_REGULATION_OF_SMOOTH_MUSCLE_CELL_DIFFERENTIATION		22	0.4415387	1.2272139	0.22093023	0.46277198	1	5824	tags=32%, list=11%, signal=36%
[truncated: 2,780 more rows]
