# Supplementary material for: A signature of immune-related gene pairs (IRGPs) for risk stratification and prognosis of oral cancer patients
Source: World J Surg Oncol. 2022 Jul 8;20:227. doi: 10.1186/s12957-022-02630-1 (PMC9264557; doi:10.1186/s12957-022-02630-1)
Supplement: Supplementary file 2 — Additional file 2. [file 12957_2022_2630_MOESM2_ESM.xls]

NAME	GS<br> follow link to MSigDB	GS DETAILS	SIZE	ES	NES	NOM p-val	FDR q-val	FWER p-val	RANK AT MAX	LEADING EDGE
KEGG_NATURAL_KILLER_CELL_MEDIATED_CYTOTOXICITY	KEGG_NATURAL_KILLER_CELL_MEDIATED_CYTOTOXICITY	Details ...	132	0.63081187	2.1090727	0	0.003107488	0.004	6136	tags=41%, list=11%, signal=46%
KEGG_JAK_STAT_SIGNALING_PATHWAY	KEGG_JAK_STAT_SIGNALING_PATHWAY	Details ...	155	0.59828043	2.1015363	0	0.001553744	0.004	6136	tags=38%, list=11%, signal=43%
KEGG_CELL_ADHESION_MOLECULES_CAMS	KEGG_CELL_ADHESION_MOLECULES_CAMS	Details ...	131	0.659516	2.0851154	0	0.001766695	0.005	2959	tags=39%, list=5%, signal=41%
KEGG_T_CELL_RECEPTOR_SIGNALING_PATHWAY	KEGG_T_CELL_RECEPTOR_SIGNALING_PATHWAY	Details ...	108	0.6515489	2.0845819	0	0.001325021	0.005	6122	tags=44%, list=11%, signal=50%
KEGG_AUTOIMMUNE_THYROID_DISEASE	KEGG_AUTOIMMUNE_THYROID_DISEASE	Details ...	50	0.7779426	2.081099	0	0.001060017	0.005	2778	tags=46%, list=5%, signal=48%
KEGG_INTESTINAL_IMMUNE_NETWORK_FOR_IGA_PRODUCTION	KEGG_INTESTINAL_IMMUNE_NETWORK_FOR_IGA_PRODUCTION	Details ...	45	0.822812	2.0574827	0	0.002079828	0.011	2778	tags=62%, list=5%, signal=65%
KEGG_CYTOKINE_CYTOKINE_RECEPTOR_INTERACTION	KEGG_CYTOKINE_CYTOKINE_RECEPTOR_INTERACTION	Details ...	263	0.5991335	2.043716	0.001792115	0.002336525	0.015	6216	tags=39%, list=11%, signal=44%
KEGG_B_CELL_RECEPTOR_SIGNALING_PATHWAY	KEGG_B_CELL_RECEPTOR_SIGNALING_PATHWAY	Details ...	75	0.6456563	2.0425084	0.001876173	0.00213821	0.016	5899	tags=44%, list=11%, signal=49%
KEGG_PRIMARY_IMMUNODEFICIENCY	KEGG_PRIMARY_IMMUNODEFICIENCY	Details ...	35	0.8167314	2.0153768	0	0.003371374	0.025	2651	tags=63%, list=5%, signal=66%
KEGG_LEISHMANIA_INFECTION	KEGG_LEISHMANIA_INFECTION	Details ...	69	0.68991643	2.0137644	0.005424955	0.003034236	0.025	5207	tags=49%, list=9%, signal=54%
KEGG_HEMATOPOIETIC_CELL_LINEAGE	KEGG_HEMATOPOIETIC_CELL_LINEAGE		85	0.68690836	1.9913516	0.005347594	0.003984615	0.033	4735	tags=51%, list=9%, signal=55%
KEGG_CHEMOKINE_SIGNALING_PATHWAY	KEGG_CHEMOKINE_SIGNALING_PATHWAY		188	0.57662153	1.9909179	0.001788909	0.003652564	0.033	3330	tags=31%, list=6%, signal=33%
KEGG_ASTHMA	KEGG_ASTHMA		28	0.83367896	1.9576069	0	0.005106872	0.051	3764	tags=71%, list=7%, signal=77%
KEGG_FC_EPSILON_RI_SIGNALING_PATHWAY	KEGG_FC_EPSILON_RI_SIGNALING_PATHWAY		79	0.56751496	1.9483633	0	0.00561546	0.06	5418	tags=37%, list=10%, signal=41%
KEGG_TYPE_I_DIABETES_MELLITUS	KEGG_TYPE_I_DIABETES_MELLITUS		41	0.780083	1.9344118	0	0.006079609	0.066	2778	tags=56%, list=5%, signal=59%
KEGG_ALLOGRAFT_REJECTION	KEGG_ALLOGRAFT_REJECTION		35	0.84931785	1.9297127	0	0.00609827	0.07	2778	tags=66%, list=5%, signal=69%
KEGG_TOLL_LIKE_RECEPTOR_SIGNALING_PATHWAY	KEGG_TOLL_LIKE_RECEPTOR_SIGNALING_PATHWAY		102	0.55976456	1.9270822	0.001953125	0.005816754	0.071	7266	tags=39%, list=13%, signal=45%
KEGG_FC_GAMMA_R_MEDIATED_PHAGOCYTOSIS	KEGG_FC_GAMMA_R_MEDIATED_PHAGOCYTOSIS		96	0.55087143	1.91418	0	0.006788692	0.083	5449	tags=32%, list=10%, signal=36%
KEGG_ANTIGEN_PROCESSING_AND_PRESENTATION	KEGG_ANTIGEN_PROCESSING_AND_PRESENTATION		81	0.65467614	1.8804393	0.009633912	0.009838544	0.112	7459	tags=48%, list=14%, signal=56%
KEGG_GRAFT_VERSUS_HOST_DISEASE	KEGG_GRAFT_VERSUS_HOST_DISEASE		37	0.81213534	1.8445368	0.003738318	0.014384935	0.154	3589	tags=65%, list=7%, signal=69%
KEGG_ALPHA_LINOLENIC_ACID_METABOLISM	KEGG_ALPHA_LINOLENIC_ACID_METABOLISM		19	0.6796253	1.8434064	0.003484321	0.013789562	0.154	8239	tags=63%, list=15%, signal=74%
KEGG_ALDOSTERONE_REGULATED_SODIUM_REABSORPTION	KEGG_ALDOSTERONE_REGULATED_SODIUM_REABSORPTION		42	0.5861027	1.8056074	0.003418803	0.020865766	0.204	10649	tags=50%, list=19%, signal=62%
KEGG_ETHER_LIPID_METABOLISM	KEGG_ETHER_LIPID_METABOLISM		33	0.56269956	1.7948316	0.003436426	0.022747219	0.221	8239	tags=48%, list=15%, signal=57%
KEGG_ARACHIDONIC_ACID_METABOLISM	KEGG_ARACHIDONIC_ACID_METABOLISM		58	0.5350012	1.7372323	0.013816926	0.036964417	0.315	11416	tags=47%, list=21%, signal=59%
KEGG_RIG_I_LIKE_RECEPTOR_SIGNALING_PATHWAY	KEGG_RIG_I_LIKE_RECEPTOR_SIGNALING_PATHWAY		71	0.48845717	1.7318949	0.011904762	0.037274413	0.328	10035	tags=38%, list=18%, signal=46%
KEGG_VIRAL_MYOCARDITIS	KEGG_VIRAL_MYOCARDITIS		68	0.5902579	1.698871	0.018181818	0.04685904	0.39	2778	tags=29%, list=5%, signal=31%
KEGG_LEUKOCYTE_TRANSENDOTHELIAL_MIGRATION	KEGG_LEUKOCYTE_TRANSENDOTHELIAL_MIGRATION		116	0.49443987	1.6944093	0.012612613	0.047090538	0.399	5218	tags=28%, list=9%, signal=31%
KEGG_LINOLEIC_ACID_METABOLISM	KEGG_LINOLEIC_ACID_METABOLISM		29	0.5785161	1.678843	0.018242123	0.051921673	0.436	12110	tags=52%, list=22%, signal=66%
KEGG_PHOSPHATIDYLINOSITOL_SIGNALING_SYSTEM	KEGG_PHOSPHATIDYLINOSITOL_SIGNALING_SYSTEM		76	0.4983468	1.6531285	0.020560747	0.06179914	0.489	5831	tags=33%, list=11%, signal=37%
KEGG_INOSITOL_PHOSPHATE_METABOLISM	KEGG_INOSITOL_PHOSPHATE_METABOLISM		54	0.51381224	1.6195495	0.017142856	0.078048736	0.568	5831	tags=35%, list=11%, signal=39%
KEGG_APOPTOSIS	KEGG_APOPTOSIS		87	0.48173383	1.6097609	0.031598512	0.0813607	0.591	6606	tags=34%, list=12%, signal=39%
KEGG_ACUTE_MYELOID_LEUKEMIA	KEGG_ACUTE_MYELOID_LEUKEMIA		57	0.49493638	1.6008273	0.042801555	0.08466333	0.609	12095	tags=47%, list=22%, signal=61%
KEGG_CYTOSOLIC_DNA_SENSING_PATHWAY	KEGG_CYTOSOLIC_DNA_SENSING_PATHWAY		55	0.48161128	1.5699683	0.044843048	0.10322347	0.684	8822	tags=35%, list=16%, signal=41%
KEGG_VEGF_SIGNALING_PATHWAY	KEGG_VEGF_SIGNALING_PATHWAY		76	0.4147411	1.5118462	0.03508772	0.1465299	0.774	5824	tags=28%, list=11%, signal=31%
KEGG_ABC_TRANSPORTERS	KEGG_ABC_TRANSPORTERS		44	0.46746063	1.4969183	0.048333332	0.15418428	0.79	6774	tags=34%, list=12%, signal=39%
KEGG_NON_SMALL_CELL_LUNG_CANCER	KEGG_NON_SMALL_CELL_LUNG_CANCER		54	0.45757434	1.4704413	0.08364312	0.17440172	0.83	10969	tags=43%, list=20%, signal=53%
KEGG_NOD_LIKE_RECEPTOR_SIGNALING_PATHWAY	KEGG_NOD_LIKE_RECEPTOR_SIGNALING_PATHWAY		62	0.45539173	1.4689114	0.067028984	0.17109624	0.832	8747	tags=40%, list=16%, signal=48%
KEGG_VASCULAR_SMOOTH_MUSCLE_CONTRACTION	KEGG_VASCULAR_SMOOTH_MUSCLE_CONTRACTION		115	0.42935017	1.4678812	0.069518715	0.16788146	0.833	8853	tags=35%, list=16%, signal=41%
KEGG_PRION_DISEASES	KEGG_PRION_DISEASES		35	0.4552643	1.4440956	0.0528169	0.18664427	0.868	7432	tags=34%, list=13%, signal=40%
KEGG_RENIN_ANGIOTENSIN_SYSTEM	KEGG_RENIN_ANGIOTENSIN_SYSTEM		17	0.5801383	1.4298412	0.11172161	0.1967663	0.884	5356	tags=29%, list=10%, signal=33%
KEGG_COLORECTAL_CANCER	KEGG_COLORECTAL_CANCER		61	0.43911326	1.4044923	0.10982659	0.21949096	0.901	10969	tags=41%, list=20%, signal=51%
KEGG_GNRH_SIGNALING_PATHWAY	KEGG_GNRH_SIGNALING_PATHWAY		101	0.3846182	1.4033632	0.06017699	0.21544847	0.901	10665	tags=35%, list=19%, signal=43%
KEGG_LONG_TERM_DEPRESSION	KEGG_LONG_TERM_DEPRESSION		70	0.3939271	1.367849	0.078464106	0.25276908	0.929	5033	tags=21%, list=9%, signal=24%
KEGG_ENDOCYTOSIS	KEGG_ENDOCYTOSIS		181	0.35456786	1.3579718	0.10642202	0.2598218	0.933	7459	tags=24%, list=14%, signal=27%
KEGG_MAPK_SIGNALING_PATHWAY	KEGG_MAPK_SIGNALING_PATHWAY		266	0.36170605	1.3493216	0.09318996	0.26430503	0.94	8732	tags=28%, list=16%, signal=33%
KEGG_ENDOMETRIAL_CANCER	KEGG_ENDOMETRIAL_CANCER		52	0.43093368	1.3413986	0.14419475	0.268624	0.942	10969	tags=37%, list=20%, signal=46%
KEGG_DORSO_VENTRAL_AXIS_FORMATION	KEGG_DORSO_VENTRAL_AXIS_FORMATION		24	0.49107832	1.3387463	0.123893805	0.26652497	0.945	11663	tags=38%, list=21%, signal=48%
KEGG_CALCIUM_SIGNALING_PATHWAY	KEGG_CALCIUM_SIGNALING_PATHWAY		177	0.37754017	1.3352616	0.12540716	0.2652813	0.948	6835	tags=25%, list=12%, signal=29%
KEGG_CIRCADIAN_RHYTHM_MAMMAL	KEGG_CIRCADIAN_RHYTHM_MAMMAL		13	0.5796531	1.3345156	0.18379447	0.2607719	0.948	7109	tags=46%, list=13%, signal=53%
KEGG_THYROID_CANCER	KEGG_THYROID_CANCER		29	0.4277572	1.3224262	0.14568345	0.27030587	0.952	10838	tags=34%, list=20%, signal=43%
KEGG_COMPLEMENT_AND_COAGULATION_CASCADES	KEGG_COMPLEMENT_AND_COAGULATION_CASCADES		69	0.457479	1.3153327	0.16101696	0.27348256	0.953	6824	tags=38%, list=12%, signal=43%
KEGG_TASTE_TRANSDUCTION	KEGG_TASTE_TRANSDUCTION		51	0.40397078	1.3147131	0.12349914	0.26904395	0.954	16537	tags=53%, list=30%, signal=76%
KEGG_PRIMARY_BILE_ACID_BIOSYNTHESIS	KEGG_PRIMARY_BILE_ACID_BIOSYNTHESIS		16	0.49060622	1.29221	0.16809605	0.29107288	0.963	7324	tags=38%, list=13%, signal=43%
KEGG_LIMONENE_AND_PINENE_DEGRADATION	KEGG_LIMONENE_AND_PINENE_DEGRADATION		10	0.527968	1.2863235	0.17857143	0.2932269	0.965	2120	tags=30%, list=4%, signal=31%
KEGG_NEUROACTIVE_LIGAND_RECEPTOR_INTERACTION	KEGG_NEUROACTIVE_LIGAND_RECEPTOR_INTERACTION		271	0.3635384	1.2772143	0.13186814	0.29875204	0.968	6835	tags=23%, list=12%, signal=26%
KEGG_NEUROTROPHIN_SIGNALING_PATHWAY	KEGG_NEUROTROPHIN_SIGNALING_PATHWAY		126	0.35358706	1.2725836	0.18518518	0.29884794	0.971	12703	tags=36%, list=23%, signal=46%
KEGG_TERPENOID_BACKBONE_BIOSYNTHESIS	KEGG_TERPENOID_BACKBONE_BIOSYNTHESIS		15	0.5221698	1.2670727	0.2010582	0.30051702	0.972	3291	tags=20%, list=6%, signal=21%
KEGG_TYPE_II_DIABETES_MELLITUS	KEGG_TYPE_II_DIABETES_MELLITUS		47	0.38774872	1.2609981	0.1754386	0.30298975	0.972	12095	tags=36%, list=22%, signal=46%
KEGG_TRYPTOPHAN_METABOLISM	KEGG_TRYPTOPHAN_METABOLISM		40	0.41142204	1.2500648	0.19755244	0.31060666	0.973	6103	tags=28%, list=11%, signal=31%
KEGG_PANCREATIC_CANCER	KEGG_PANCREATIC_CANCER		69	0.3739087	1.2489544	0.22056074	0.30681044	0.974	10969	tags=36%, list=20%, signal=45%
KEGG_SYSTEMIC_LUPUS_ERYTHEMATOSUS	KEGG_SYSTEMIC_LUPUS_ERYTHEMATOSUS		136	0.39945152	1.2410206	0.23198594	0.31127387	0.975	4584	tags=26%, list=8%, signal=28%
KEGG_MTOR_SIGNALING_PATHWAY	KEGG_MTOR_SIGNALING_PATHWAY		52	0.36252487	1.23173	0.20522387	0.31794706	0.979	14076	tags=44%, list=26%, signal=59%
KEGG_SMALL_CELL_LUNG_CANCER	KEGG_SMALL_CELL_LUNG_CANCER		84	0.3705447	1.1865258	0.24637681	0.37439734	0.988	10969	tags=37%, list=20%, signal=46%
KEGG_LONG_TERM_POTENTIATION	KEGG_LONG_TERM_POTENTIATION		70	0.3422096	1.1822553	0.22413793	0.3743532	0.991	11177	tags=30%, list=20%, signal=38%
KEGG_PROSTATE_CANCER	KEGG_PROSTATE_CANCER		89	0.3569387	1.1776553	0.24074075	0.3751249	0.992	11041	tags=36%, list=20%, signal=45%
KEGG_AXON_GUIDANCE	KEGG_AXON_GUIDANCE		129	0.34110346	1.1693954	0.2504472	0.3803232	0.992	10877	tags=33%, list=20%, signal=41%
KEGG_FATTY_ACID_METABOLISM	KEGG_FATTY_ACID_METABOLISM		42	0.38744077	1.1630148	0.29499072	0.38373703	0.993	3276	tags=21%, list=6%, signal=23%
KEGG_PATHWAYS_IN_CANCER	KEGG_PATHWAYS_IN_CANCER		324	0.31274858	1.1593555	0.26003492	0.38272783	0.993	11041	tags=32%, list=20%, signal=40%
KEGG_REGULATION_OF_ACTIN_CYTOSKELETON	KEGG_REGULATION_OF_ACTIN_CYTOSKELETON		213	0.31531778	1.1522486	0.2618629	0.38673326	0.995	5726	tags=20%, list=10%, signal=22%
KEGG_SPHINGOLIPID_METABOLISM	KEGG_SPHINGOLIPID_METABOLISM		39	0.36408204	1.1475159	0.28181818	0.38772157	0.996	5214	tags=23%, list=9%, signal=25%
KEGG_REGULATION_OF_AUTOPHAGY	KEGG_REGULATION_OF_AUTOPHAGY		35	0.34731704	1.1395338	0.2835821	0.3933318	0.996	7748	tags=20%, list=14%, signal=23%
KEGG_PANTOTHENATE_AND_COA_BIOSYNTHESIS	KEGG_PANTOTHENATE_AND_COA_BIOSYNTHESIS		16	0.4300885	1.1380957	0.30018082	0.3900923	0.996	5579	tags=31%, list=10%, signal=35%
KEGG_ADHERENS_JUNCTION	KEGG_ADHERENS_JUNCTION		73	0.36203548	1.127933	0.31688803	0.39886576	0.996	7523	tags=27%, list=14%, signal=32%
KEGG_PPAR_SIGNALING_PATHWAY	KEGG_PPAR_SIGNALING_PATHWAY		69	0.33503944	1.0997149	0.3301282	0.43245336	0.997	17702	tags=46%, list=32%, signal=68%
KEGG_GLYCOSPHINGOLIPID_BIOSYNTHESIS_LACTO_AND_NEOLACTO_SERIES	KEGG_GLYCOSPHINGOLIPID_BIOSYNTHESIS_LACTO_AND_NEOLACTO_SERIES		26	0.34994984	1.0710477	0.35069445	0.46813524	0.998	7848	tags=27%, list=14%, signal=31%
KEGG_RENAL_CELL_CARCINOMA	KEGG_RENAL_CELL_CARCINOMA		69	0.31321844	1.0586481	0.38246268	0.4805854	0.998	5794	tags=23%, list=10%, signal=26%
KEGG_MELANOMA	KEGG_MELANOMA		71	0.31386125	1.0463197	0.4154104	0.4925305	0.998	11041	tags=35%, list=20%, signal=44%
KEGG_LYSINE_DEGRADATION	KEGG_LYSINE_DEGRADATION		44	0.35251993	1.0341681	0.40761906	0.50455725	0.998	5475	tags=25%, list=10%, signal=28%
KEGG_CHRONIC_MYELOID_LEUKEMIA	KEGG_CHRONIC_MYELOID_LEUKEMIA		72	0.3123942	1.0204854	0.44656488	0.5184595	1	10969	tags=29%, list=20%, signal=36%
KEGG_ERBB_SIGNALING_PATHWAY	KEGG_ERBB_SIGNALING_PATHWAY		87	0.2957373	1.0019051	0.44708028	0.5403335	1	6544	tags=21%, list=12%, signal=23%
KEGG_ADIPOCYTOKINE_SIGNALING_PATHWAY	KEGG_ADIPOCYTOKINE_SIGNALING_PATHWAY		67	0.29803702	0.9935717	0.459854	0.54594404	1	11019	tags=27%, list=20%, signal=34%
KEGG_TGF_BETA_SIGNALING_PATHWAY	KEGG_TGF_BETA_SIGNALING_PATHWAY		84	0.29857767	0.96092695	0.5063291	0.59040093	1	10926	tags=27%, list=20%, signal=34%
KEGG_GLIOMA	KEGG_GLIOMA		65	0.28349248	0.9581527	0.513465	0.5882243	1	12325	tags=32%, list=22%, signal=42%
KEGG_RIBOFLAVIN_METABOLISM	KEGG_RIBOFLAVIN_METABOLISM		16	0.3571245	0.9539862	0.5107143	0.58765465	1	5579	tags=31%, list=10%, signal=35%
KEGG_MELANOGENESIS	KEGG_MELANOGENESIS		101	0.27960223	0.9532055	0.5262238	0.58215326	1	10649	tags=27%, list=19%, signal=33%
KEGG_HISTIDINE_METABOLISM	KEGG_HISTIDINE_METABOLISM		29	0.31469187	0.94118994	0.54404145	0.5936718	1	12183	tags=34%, list=22%, signal=44%
KEGG_P53_SIGNALING_PATHWAY	KEGG_P53_SIGNALING_PATHWAY		68	0.2828114	0.93762666	0.53009707	0.59221333	1	8323	tags=25%, list=15%, signal=29%
KEGG_HEDGEHOG_SIGNALING_PATHWAY	KEGG_HEDGEHOG_SIGNALING_PATHWAY		56	0.29882887	0.93472886	0.5477032	0.5895738	1	14381	tags=36%, list=26%, signal=48%
KEGG_INSULIN_SIGNALING_PATHWAY	KEGG_INSULIN_SIGNALING_PATHWAY		137	0.25540528	0.9128325	0.5750916	0.6158672	1	8910	tags=22%, list=16%, signal=26%
KEGG_WNT_SIGNALING_PATHWAY	KEGG_WNT_SIGNALING_PATHWAY		150	0.24292102	0.88195133	0.6152482	0.65717417	1	10108	tags=26%, list=18%, signal=32%
KEGG_TAURINE_AND_HYPOTAURINE_METABOLISM	KEGG_TAURINE_AND_HYPOTAURINE_METABOLISM		10	0.38930544	0.8788001	0.61295974	0.6549417	1	9638	tags=30%, list=17%, signal=36%
KEGG_PROXIMAL_TUBULE_BICARBONATE_RECLAMATION	KEGG_PROXIMAL_TUBULE_BICARBONATE_RECLAMATION		23	0.32246515	0.8727996	0.62393165	0.6575178	1	13452	tags=39%, list=24%, signal=52%
KEGG_ARRHYTHMOGENIC_RIGHT_VENTRICULAR_CARDIOMYOPATHY_ARVC	KEGG_ARRHYTHMOGENIC_RIGHT_VENTRICULAR_CARDIOMYOPATHY_ARVC		74	0.27948827	0.86590934	0.61648744	0.66133916	1	6708	tags=20%, list=12%, signal=23%
KEGG_GAP_JUNCTION	KEGG_GAP_JUNCTION		90	0.25051144	0.8647892	0.6340206	0.65589637	1	12954	tags=30%, list=23%, signal=39%
KEGG_NICOTINATE_AND_NICOTINAMIDE_METABOLISM	KEGG_NICOTINATE_AND_NICOTINAMIDE_METABOLISM		24	0.28630996	0.8618451	0.65140843	0.6532889	1	5579	tags=17%, list=10%, signal=19%
KEGG_FOCAL_ADHESION	KEGG_FOCAL_ADHESION		199	0.2668864	0.8504312	0.6032907	0.66349083	1	5900	tags=18%, list=11%, signal=20%
KEGG_EPITHELIAL_CELL_SIGNALING_IN_HELICOBACTER_PYLORI_INFECTION	KEGG_EPITHELIAL_CELL_SIGNALING_IN_HELICOBACTER_PYLORI_INFECTION		68	0.24322319	0.8437557	0.6808118	0.66706926	1	2959	tags=12%, list=5%, signal=12%
KEGG_GLYCOSPHINGOLIPID_BIOSYNTHESIS_GLOBO_SERIES	KEGG_GLYCOSPHINGOLIPID_BIOSYNTHESIS_GLOBO_SERIES		14	0.31285796	0.8097646	0.7083333	0.71158004	1	7248	tags=29%, list=13%, signal=33%
KEGG_VASOPRESSIN_REGULATED_WATER_REABSORPTION	KEGG_VASOPRESSIN_REGULATED_WATER_REABSORPTION		44	0.23261313	0.78676003	0.8080439	0.74103975	1	7283	tags=16%, list=13%, signal=18%
KEGG_OLFACTORY_TRANSDUCTION	KEGG_OLFACTORY_TRANSDUCTION		384	0.21688397	0.77922416	0.8407258	0.7452496	1	18610	tags=30%, list=34%, signal=45%
KEGG_NON_HOMOLOGOUS_END_JOINING	KEGG_NON_HOMOLOGOUS_END_JOINING		13	0.29684535	0.72483104	0.8039604	0.81840837	1	6256	tags=15%, list=11%, signal=17%
KEGG_ECM_RECEPTOR_INTERACTION	KEGG_ECM_RECEPTOR_INTERACTION		84	0.26530218	0.7248279	0.72629696	0.8103922	1	4197	tags=14%, list=8%, signal=15%
KEGG_SULFUR_METABOLISM	KEGG_SULFUR_METABOLISM		13	0.27125195	0.71212965	0.8444846	0.81977934	1	10575	tags=31%, list=19%, signal=38%
KEGG_BASAL_CELL_CARCINOMA	KEGG_BASAL_CELL_CARCINOMA		55	0.22266692	0.6699276	0.8949212	0.8679612	1	9860	tags=22%, list=18%, signal=27%
KEGG_STEROID_BIOSYNTHESIS	KEGG_STEROID_BIOSYNTHESIS		17	0.27154565	0.65023303	0.8261649	0.8805273	1	13514	tags=41%, list=24%, signal=55%
